# Supplementary material for: Long Non-Coding RNA Expression Profile Associated with Malignant Progression of Oral Submucous Fibrosis
Source: J Oncol. 2019 Jul 29;2019:6835176. doi: 10.1155/2019/6835176 (PMC6699286; doi:10.1155/2019/6835176)
Supplement: Supplementary Materials — Supplementary Table S1. Summary of RNA-seq data and reads mapped to the human reference genome. Supplementary Table S2. List of lncRNAs identified during the OSF progression to OSCC. Supplementary Table S3. List of differentially expressed lncRNAs during the OSF progression to OSCC. Supplementary Table S4. List of differentially expressed lncRNAs among three stages of OSF progression. Supplementary Table S5. List of cis-acting lncRNAs during the OSF progression to OSCC. Supplementary Table S6. List of tans-acting lncRNAs during the OSF progression to OSCC. Supplementary Table S7. Primers used in the qPCR analysis. [file 6835176.f1.xlsx]

## Sheet: Table S1 Allsample.stat
Sample	Total_reads	Total_mapped_reads	Unique_mapped_reads	Reads_mapped_in_paired
010M	200000000	0.7782	0.4136	0.7061
011N	200000000	0.775	0.4937	0.6962
011T	200000000	0.804	0.5369	0.7268
013N	200000000	0.7997	0.5153	0.7293
013T	200000000	0.7491	0.4605	0.6733
01T	200000000	0.811	0.4675	0.7476
024N	200000000	0.7681	0.5339	0.6853
025N	200000000	0.7987	0.5349	0.7086
03T	200000000	0.8008	0.4422	0.7342
05N	200000000	0.8123	0.5494	0.7476
05T	200000000	0.7426	0.4333	0.6758
06T	181737452	0.7837	0.4998	0.7059
07N	198239246	0.8072	0.5457	0.7389
07T	149439282	0.7593	0.5132	0.6779
08N	200000000	0.8365	0.6194	0.7685
08T	200000000	0.8183	0.6049	0.7447
ON1	200000000	0.8114	0.5916	0.748
ON2	175289408	0.8544	0.5954	0.781

## Sheet: Table S2
ID	chr	start	end	strand	length	010M	011N	011T	013N	013T	01T	024N	025N	03T	05N	05T	06T	07N	07T	08N	08T	ON1	ON2
MSTRG.24488.1	chr5	147326628	147345476	+	2425	1.5711	2.2015	22.4307	0.7345	0.9114	5.2065	3.5603	1.1078	1.0733	2.9445	48.2676	5.8966	2.8045	0.8906	0.6842	1.9577	1.8041	0.8787
MSTRG.8945.20	chr14	49980625	50119019	-	369	439652	242725	263770	151338	250894	148526	156773	311198	160710	164284	270900	272911	165243	321005	116806	251711	197652	75516.1
MSTRG.23786.1	chr5	79399755	79439673	+	1506	116.142	337.082	240.79	271.427	137.026	337.311	169.454	139.683	240.219	315.822	314.822	310.224	386.857	186.25	241.951	226.856	336.868	139.644
MSTRG.3453.2	chr10	34895124	34900838	-	3592	6.9426	24.3622	19.8347	21.8178	10.5364	23.6328	20.5705	7.5938	30.8849	32.0817	5.0323	15.3445	27.9984	17.2109	30.8112	9.2989	30.7418	33.5746
MSTRG.20327.1	chr3	64282130	64304114	+	345	34.1336	63.2441	19.7855	28.3948	13.6125	17.1304	15.7137	161.121	33.9478	18.972	24.9086	6.0287	22.6994	57.9053	24.0475	65.8544	101.956	254.454
MSTRG.28748.36	chr8	70595617	70602574	+	237	205757	102169	55789.6	84073.7	101836	111561	45757.9	77309.5	120450	47232.5	87114.9	110255	70237.2	69932	32164.1	26841.9	31813.7	42855.8
MSTRG.29692.1	chr9	21856227	21863598	-	4731	15.008	36.9939	99.1037	44.66	46.3635	31.1165	17.5279	11.3564	115.734	40.4569	66.3305	33.1923	35.415	88.219	10.9777	28.7423	28.2233	18.2404
MSTRG.8989.45	chr14	50285201	50389238	+	1292	110555	47020	51657.6	47607.3	58673.4	43470.5	50867.1	89545.7	34549.5	50684.3	76636.1	53300.3	40893.6	69554.8	31640.9	58776.7	46736.2	25664.1
MSTRG.8516.12	chr13	110076469	110094847	+	269	357669	342637	354870	326594	418923	325035	605321	667213	181946	279138	314477	302973	359111	336595	294867	500764	335220	386745
MSTRG.28748.23	chr8	70541230	70602616	+	398	129998	68190	35038.9	55146.2	63519.7	70031.6	28861.2	66184.2	78550	29950.9	55709.3	68066.5	43194.8	47414.6	22899.7	17844.1	19793.8	28616.2
MSTRG.31621.1	chrY	21152513	21154356	+	1709	109.034	1361.88	984.305	824.775	255.24	1332.96	606.821	811.938	729.287	1517.81	844.071	914.445	1036.1	367.429	1088.19	252.887	1319.82	473.651
MSTRG.23804.10	chr5	79908212	79968746	+	250	49026	52934.3	46630.8	42327.6	59238.8	36199.2	72792	80564	24285.5	34256.3	45974.4	45072.5	33968	52089	29409.1	47547.4	37665.4	58964.5
MSTRG.29605.6	chr9	9413130	9473593	-	297	91309.7	39076.5	40147.2	29193.7	65240.6	24711.8	29403.9	59685.5	26980.7	27257.2	44922.9	53926	26199.3	57237.8	21598.6	33462	25242.3	15927.5
MSTRG.4723.11	chr11	10456480	10531348	+	220	48982.6	52372.4	53409.4	45275.1	60492.1	39626.2	77766.1	81474.3	25534.2	37421.1	51182.3	47554.1	31994	55029.7	30477.9	47251.4	42890.7	64312.6
MSTRG.17997.6	chr2	239171920	239198743	-	1311	96.166	160.589	75.1717	134.162	21.7042	259.415	144.425	96.9374	44.42	100.609	39.7814	46.2068	236.111	57.4523	165.548	45.9119	85.1636	188.045
MSTRG.3933.1	chr10	79795276	79853416	-	239	5647.49	7379.26	11376	9653.68	9989.07	6266.29	7959.17	7609.45	5940.39	9181.9	11734	12613.2	10447.5	10399.8	6587.13	7242.44	10145.6	5674.55
MSTRG.1639.1	chr1	144674400	144951762	+	2036	830.336	456.372	409.756	669.782	1127.4	874.649	1372.76	853.871	953.309	401.266	392.239	529.425	664.518	956.277	369.833	832.93	525.083	840.472
MSTRG.17496.1	chr2	191780050	191879347	-	1037	4072.44	1618.34	6301.86	5022.2	9491.48	2188.98	877.88	536.433	2960.94	2713.31	2135.44	3719.3	4209.37	7074.51	1910.81	7246.86	1404.89	871.406
MSTRG.4723.29	chr11	10495527	10531931	+	905	12020.7	12822.7	12080.3	11166.2	14905.5	9727.88	16958.9	20087.5	6147.18	9183.85	12545.2	11542	7808.97	13219.9	7452.45	11606.8	10559.7	15701.6
MSTRG.16544.1	chr2	92291370	92321322	+	345	99.3892	250.285	37.0977	451.735	191.376	166.632	927.688	930.19	357.395	54.6163	80.7382	721.937	169.648	222.231	327.046	296.345	142.028	239.014
MSTRG.7861.2	chr12	127627874	127650987	+	476	5476.94	1968.14	1378.91	1592.16	2185.08	1993.89	1632.02	1313.65	2369.6	1368.82	3166.83	1863.06	1007.92	1776.32	574.473	775.445	754.041	538.505
MSTRG.264.10	chr1	19231687	19246855	-	512	305.767	985.147	806.169	951.008	494.776	3088.26	448.63	214.311	508.333	610.139	997.207	987.141	1562.96	586.855	964.456	311.615	146.972	53.2686
MSTRG.29604.5	chr9	9389357	9476178	+	226	156087	70841.6	75964.5	88533.3	109765	45215.2	53943.8	104791	50138.7	48038.6	82222.7	95865.3	68205.5	97123.7	35858.8	65915.4	48674.5	26070.5
MSTRG.15861.2	chr2	33141280	33141694	+	273	49625.3	28779.4	17468.1	7387.11	21036.8	56582.8	7819.61	14989.5	25782.4	9017.73	10207.5	25297.8	12129.7	8727.84	4061.89	9458.19	5564.08	3179.73
MSTRG.12998.9	chr17	39650403	39658900	+	569	279.398	21474.5	2667.34	44923	157.79	20188.8	41540.7	9580.36	2303.06	79341.6	1599.33	6929.2	26192.2	125.73	54415.3	3055.19	69690.3	23900.3
MSTRG.16505.1	chr2	89070434	89072489	-	1221	103.254	4.1823	1.0482	4.5586	3.62	11.8807	0.9867	4.231	0.7993	4.7109	20.6288	5.3233	2.7006	11.055	4.8922	10.5535	3.7264	1.047
MSTRG.4723.8	chr11	10436043	10531931	+	910	12079.5	12858.1	13110.9	11164.6	14903.5	9785.13	19148.8	20006.8	6286.44	9199.65	12655.4	11660.3	7870.46	13546.5	7478.24	11632.5	10545.9	15962.8
MSTRG.23973.1	chr5	100320141	100325905	+	264	26.2391	70.3392	302.192	6.7467	66.9707	34.597	10.6477	0	75.1717	21.0364	101.02	70.9057	53.8635	61.3554	31.4257	17.3404	7.2916	5.6497
MSTRG.12998.8	chr17	39639178	39657738	+	474	124.951	8528.67	1116.96	18699.5	55.3674	8469.96	16672	3946.69	835.296	34097.5	630.162	2976.69	10839.1	46.1331	20991.6	1189.36	27863.3	8162.91
MSTRG.18798.20	chr21	17906892	17982254	+	4255	12.4542	60.2256	5.7652	166.811	33.566	32.1984	83.9477	82.0256	207.739	222.163	170.205	26.9458	185.502	33.5631	133.249	42.3179	389.687	440.17
MSTRG.8784.1	chr14	31093175	31127461	-	331	860.135	597.479	1091.69	911.415	983.999	543.764	526.531	611.187	1182.4	814.946	728.73	989.681	650.013	1080.67	732.89	826.751	783.002	431.299
MSTRG.9665.4	chr14	106013526	106235914	+	473	395821	10377.2	4081.34	860.439	3611.16	60209.1	7903.23	10573.3	2391.51	14723.1	49580.5	4060.86	6773.4	15704.1	5784.32	16348.9	13578.9	2875.83
MSTRG.3.8	chr1	556293	616615	-	296	40094.2	64071.2	47645.7	46535	42855.8	47956	59967.7	109410	34377.6	43241.6	48262.1	37086	43652	27541.8	63977	44445.2	54506.3	77708.1
MSTRG.6938.2	chr12	52884353	52911538	+	239	36384.8	72083.2	107143	92196.7	116718	87015.5	32994.4	5645.05	156237	97338.5	110122	107101	120420	48242.2	62965.8	54977.7	109504	12171.1
MSTRG.19765.47	chr3	15721350	15780208	-	635	29238.5	19759.8	17461	19432.5	17993.5	13874.3	21184.6	31896.5	9860.92	14921.7	20302.3	19660.4	12863	21889.6	15445.7	20184	17320.8	13727
MSTRG.1968.23	chr1	153028906	153113162	+	283	1644.89	19381.6	35162.5	6367.69	2559.5	50643.1	7162.3	1026.64	18014	76019.5	42490.9	21918	36854.5	6958.96	14684.9	1443.28	31175.2	635.459
MSTRG.1668.1	chr1	145312726	145366826	-	608	2221.69	2786.58	2336.96	3946.02	2774.36	3521.43	1730.78	1178.68	4616.73	2478.97	2019.7	3122.42	4311.21	3006.01	3124.25	2793.12	3174.74	1951.31
MSTRG.6259.3	chr12	6646948	6647537	-	339	3784.38	4735.51	11432.6	4220.33	6323.7	5024.04	4430.31	2782.05	6809.92	5050.45	6168.66	4718.89	6516.95	6843.07	3596.57	5163.04	5860.67	2478.33
MSTRG.30675.7	chrM	628	1554	-	469	2.12808e+06	2.15201e+06	2.15542e+06	1.95321e+06	2.33545e+06	2.17304e+06	3.44971e+06	3.21535e+06	1.32159e+06	2.03751e+06	2.22944e+06	1.77102e+06	2.05547e+06	1.88304e+06	1.88984e+06	2.53511e+06	2.17764e+06	2.21239e+06
MSTRG.8518.6	chr13	110076468	110149178	-	637	151442	145163	150244	138412	177948	137508	256368	282706	76990.1	117955	132919	128346	152079	142562	124829	211907	141935	163496
MSTRG.5322.13	chr11	65266516	65314416	+	1830	26170.9	23806.6	26614.8	28933.1	33358.7	25491.9	17781.2	14973	50096	22817.4	23066	55145.2	25367	27118.2	19564.6	29795	15959.3	14292.1
MSTRG.19765.39	chr3	15720418	15780208	-	328	56698.9	39848.8	35973	38928.2	36550.6	27560.6	41036.2	66413.4	19789.8	28918.2	41685.3	41254.8	26133.4	42940.7	31017.9	40635.3	34728.3	26601.8
MSTRG.16053.1	chr2	48128079	48128959	+	771	13.0277	15.3542	13.8335	19.6363	13.6156	9.4075	11.9794	5.3604	18.5664	16.2071	9.6085	12.8139	15.5033	13.6558	17.2169	10.1159	14.0726	23.7671
MSTRG.15130.1	chr19	42223849	42265408	-	252	196.543	2973.34	1663.33	1981.68	298.179	1713.09	1091.57	4628.95	1535	3509.58	1226.46	1020.35	2015.07	732.759	1162.81	213.957	1663.19	153.042
MSTRG.8576.1	chr14	21015099	21081636	+	266	3.9063	152.71	4.8115	42.6868	13.5011	20.1982	95.8638	74.5777	4.8922	156.587	35.6483	5.8644	27.1166	13.1937	34.3084	10.1985	61.8418	83.3073
MSTRG.18737.12	chr21	9826705	9852478	-	456	3.66094e+06	2.03844e+06	1.90548e+06	1.90422e+06	2.27682e+06	1.95698e+06	1.04544e+06	1.09193e+06	3.28533e+06	1.09848e+06	2.29071e+06	1.91979e+06	1.4419e+06	1.07806e+06	1.13587e+06	920976	954725	2.47266e+06
MSTRG.9671.5	chr14	106092059	106238197	+	799	201629	4002.1	2425.72	268.061	1918.91	22118.2	4389.64	5229.42	1306.22	7382.15	27137.4	3232.11	3531.84	9785.6	2747.05	10356.6	7111.67	1561.92
MSTRG.9671.2	chr14	106091783	106238531	+	794	202907	4027.3	2441	269.749	1931	22259.6	4417.28	5262.61	1314.44	7428.64	27309	3252.47	3554.08	9847.56	2764.35	10421.8	7156.89	1571.76
MSTRG.249.2	chr1	17067011	17222709	+	330	32043.2	38180.1	25989.1	61160.8	53584.1	21897.9	41698.9	58616.3	11529.6	30135.6	27042.9	56265.3	27776.7	60215	14276.3	40812.9	39297.4	34485.1
MSTRG.8945.9	chr14	49958453	50086272	-	458	358107	185938	222282	137167	209720	119710	128683	247438	132123	137711	220853	217665	139233	263206	110377	212531	180750	60156.8
MSTRG.20465.2	chr3	96273725	96364945	-	343	13778.5	17269.5	14543.1	12935.2	11588.2	13346.4	15466.9	22609	5000.46	14311.4	13387.4	12692.4	10177.5	14854.3	10569.1	13170.6	13040.8	17367.1
MSTRG.13802.1	chr18	3254103	3283416	-	1910	565.231	623.198	1974.98	876.926	1490.62	475.106	817.965	624.254	646.578	989.433	580.241	726.876	836.431	1179.5	700.372	973.185	707.327	367.023
MSTRG.6861.1	chr12	50934569	50939171	-	1441	14.4215	34.4716	19.54	62.7288	25.6891	39.5217	17.4172	4.5889	53.5072	37.026	30.6403	29.5892	35.325	26.2283	47.9015	33.063	31.5751	31.3475
MSTRG.12930.2	chr17	37559964	37562847	+	1178	33.2243	40.9854	68.9914	46.3048	60.0349	45.3807	31.8734	25.611	63.2439	41.9249	57.1019	60.0311	50.3845	57.7512	35.2139	61.0267	44.2697	22.248
MSTRG.17021.1	chr2	145255574	145342752	-	6316	102.328	53.7667	36.8466	39.3041	43.1264	42.1498	18.0885	9.1936	38.2715	27.1325	28.9007	19.9642	62.1588	76.3387	28.8193	39.1663	35.022	62.1073
MSTRG.7886.3	chr13	19444889	19446986	-	210	0	5.5267	0	104.959	0	2.5584	38.2449	17.7122	0	7.5559	0	0	14.7205	0	4.7408	0	5	15.2196
MSTRG.29605.3	chr9	9413097	9479231	-	328	82683	35384.7	36356.7	26513.3	59076.3	22377	26628	54046.4	24432.7	24681.7	40680.7	48834.9	23724.4	51829.8	19558.2	30304.1	22856.6	14424.1
MSTRG.17488.1	chr2	192428463	192432676	+	3084	0.7862	2.258	37.7653	5.4144	28.3958	2.439	0.0651	0	8.7557	1.6722	2.306	1.5174	17.7753	9.7166	16.9479	0.3848	0	0.0691
MSTRG.29175.2	chr8	116543093	116547445	+	4264	10.8846	41.8076	29.6155	31.1196	20.4729	31.3744	32.3969	17.7371	38.5303	39.0268	43.4343	14.8773	40.937	41.9128	18.5229	32.4071	34.2283	25.0852
MSTRG.9671.10	chr14	106092110	106237957	+	508	317103	6294.18	3815.26	421.615	3018.13	34785.2	6903.78	8225.01	2053.18	11609.3	42680.3	5083.58	5554.19	15389.5	4320.33	16289.2	11183.4	2456.65
MSTRG.5322.8	chr11	65266516	65276028	+	387	123521	112293	125631	136486	157435	120318	83956.9	70604.9	236558	107740	108807	260401	119776	127811	92343	140490	75318.8	67468
MSTRG.30717.1	chrX	3740740	3780187	+	1032	178.212	77.1482	52.2945	114.557	49.5223	301.174	62.4537	50.4592	88.5839	77.0695	31.0109	142.086	225.058	252.96	568.689	495.508	347.794	80.3158
MSTRG.6934.22	chr12	52910118	52910636	+	274	321.075	581.993	894.509	990.509	1185.67	479.427	219.838	49.7751	1480.62	609.508	866.268	994.405	887.526	504.458	392.413	484.519	813.682	129.089
MSTRG.31619.5	chrY	21152522	21233375	-	780	492.447	4255.82	2731.21	2510.99	903.493	3842.87	1515.67	2427.25	3429.34	4365.08	2389.23	2529.88	3255.37	1214.49	3202.2	875.577	4086.68	1845.83
MSTRG.13328.1	chr17	60070782	60082407	+	933	128.074	135.341	145.637	166.325	134.13	107.973	110.615	67.7733	222.119	114.584	110.527	195.339	117.07	150.173	130.715	125.391	110.664	94.7759
MSTRG.9657.1	chr15	20610981	20616895	+	733	17.0107	18.3669	47.726	17.9206	19.5978	22.3558	58.6195	6.2021	2.663	16.7767	31.5327	1.7734	40.7674	29.0957	12.6766	49.2691	16.9508	3.4883
MSTRG.23804.9	chr5	79908212	79952332	+	844	14467.3	15631.8	13739.2	12465.5	17448.5	10680.8	21514.5	23818.7	7128.03	10059.4	13537.3	13251.1	9988.11	15327.8	8654.59	13999.4	11063.7	17411.5
MSTRG.23804.30	chr5	79944197	79948279	+	1006	12009.9	12994.8	10911.8	10206.3	14407.2	8859.64	16707.7	19902.4	5843.06	8306.97	11160	10900.4	7921.63	12561.1	7156.67	11301.1	9114.92	14449.2
MSTRG.14193.3	chr18	52495693	52531481	+	2470	27.4841	88.2429	123.41	93.383	53.9087	63.8418	62.4305	72.5339	56.1101	156.105	70.3025	99.89	84.9377	106.127	64.02	80.6567	178.329	67.8905
MSTRG.5318.2	chr11	65205072	65205389	-	298	1035.58	1598.35	526.837	862.921	604.422	2641.28	939.919	330.766	1199.8	1538.16	641.377	1942.06	1270.41	597	2235.57	871.649	551.424	801.532
MSTRG.23804.11	chr5	79913133	79947544	+	428	28266.9	30485.7	26784.6	24325.6	33983.8	20862	41974.5	46516.2	13872.3	19645.7	26405.6	25863.3	19288.3	29897.2	16876.6	27290.9	21582.1	33944.5
MSTRG.9277.2	chr14	71277047	71282019	+	537	14.8346	42.3607	46.0786	35.6557	8.7455	25.5129	37.7641	20.7797	97.5393	77.9339	112.571	80.8528	52.577	32.1745	21.6293	7.5777	37.8024	4.7614
MSTRG.1665.20	chr1	145313552	145324252	+	1263	162.346	208.044	170.751	267.945	192.7	266.721	137.99	102.421	322.242	200.699	145.7	267.192	282.288	192.587	191.809	191.164	204.374	150.654
MSTRG.4723.39	chr11	10523362	10531971	+	1349	7977.23	8523.37	7986.63	7431.49	9932.25	6437.3	11350.7	13443.7	3992.99	6086.01	8256.94	7623.48	5139.33	8746.71	4950.78	7689.35	7018.91	10467
MSTRG.3450.2	chr10	34902743	34925181	+	2671	36.8271	120.796	100.387	117.53	56.9884	120.992	102.836	39.1468	171.01	152.378	26.1823	79.7192	146.521	84.4964	145.738	50.5922	147.744	121.894
MSTRG.8320.1	chr13	77759285	77810681	+	1328	368.003	312.347	492.802	623.663	718.303	277.132	238.735	157.316	5850.85	447.916	363.044	655.647	826.829	528.95	418.318	541.975	922.435	586.436
MSTRG.25880.1	chr6	108854002	108897458	+	878	213.415	212.027	261.173	243.434	112.956	210.809	410.947	159.806	347.195	167.846	162.001	266.798	241.295	178.029	221.111	103.893	152.476	209.677
MSTRG.30760.1	chrX	16782199	16789949	-	239	39.1281	51.4742	70.509	48.4407	45.0791	48.332	44.5257	46.689	49.0042	50.6232	28.5168	66.3567	75.0189	49.7005	60.4005	48.9498	49.7906	30.3118
MSTRG.13521.1	chr17	70520450	70539603	+	1483	61.1904	56.5038	98.6729	110.645	53.4625	281.678	18.4132	17.6963	96.9637	26.6152	43.36	67.6704	109.922	123.058	66.9082	51.3339	35.047	16.0919
MSTRG.16934.1	chr2	134252650	134318036	+	4501	32.7041	19.339	65.3537	52.8779	78.316	25.3058	16.6392	12.2581	232.959	69.2285	79.5953	152.261	113.78	87.2689	40.2562	69.7263	73.5611	66.8432
MSTRG.4532.1	chr11	1262662	1294679	-	213	37.4	45204.4	22.0322	225.777	88.1938	123.598	254.517	360858	58.0406	85.6695	52.8657	85.442	49.3446	79.8485	135.547	46.1687	36.1501	39.0136
MSTRG.23804.18	chr5	79922611	79956077	+	210	58087.2	62778.3	54916.6	50026.4	70071.2	42893.5	82382.3	95699	28620	40377.1	54330.7	53212	38688.3	61376.9	34759.5	56208.5	44444.8	69667.2
MSTRG.3540.10	chr10	47746962	47770871	+	646	541.517	789.062	1270.3	1927.26	2623.99	706.936	830.494	207.922	1282.2	1355.25	2258.23	2042.07	1247.68	1426.71	1291.72	2318.85	1726.42	548.848
MSTRG.13791.1	chr18	2668263	2672270	-	2749	18.3951	9.5415	26.6155	16.6029	12.4611	15.44	9.9334	5.7881	12.5447	13.1315	8.9469	9.1738	12.3697	19.8373	11.589	18.9966	9.7399	12.6341
MSTRG.16206.2	chr2	64340304	64418370	+	4778	198.187	240.961	191.882	449.569	78.459	386.368	252.684	58.2127	175.74	335.208	118.332	130.103	529.45	127.467	543.902	90.3466	96.9857	264.002
MSTRG.4723.27	chr11	10494244	10531931	+	847	12845.4	13703.5	12909	11932.2	15926.5	10399.7	18121.4	21464.2	6572.34	9815.08	13408.2	12333.9	8345.41	14129.9	7964.54	12403	11283.2	16813.3
MSTRG.23529.18	chr5	58764060	58883308	-	1356	441.63	509.943	329.721	518.51	607.718	372.445	858.521	1264.08	503.834	246.905	359.044	575.769	560.203	827.013	378.967	685.33	657.408	608.582
MSTRG.19600.1	chr22	50980699	50983513	-	928	12.3165	8.2542	45.9724	11.276	74.4219	10.7107	1.2982	0.4453	18.2299	14.3201	38.3181	34.7397	30.6465	45.6728	10.1917	44.2147	5.2801	1.3776
MSTRG.27724.1	chr7	116655571	116706607	-	3667	92.1853	83.4921	61.9518	67.6362	166.792	62.4888	53.7691	29.5284	115.956	55.3328	68.7684	81.9596	76.7134	109.767	66.6517	97.8372	91.7708	69.4947
MSTRG.12998.12	chr17	39657236	39759594	+	486	5281.57	79364.7	28252	159270	31295.7	68978.6	115377	32102.7	46356.6	242769	28677.8	40905.3	90084.8	9405.96	156233	17188.1	207471	62957.3
MSTRG.23945.1	chr5	96254057	96254502	-	295	412.105	84.1924	355.038	340.377	558.127	64.6547	102.775	8.4058	36.3932	141.194	123.553	29.9647	211.675	352.326	18.5614	70.1192	34.9998	174.071
MSTRG.12510.4	chr17	18918949	19093552	-	222	4338.81	3406.51	5098.35	3959.4	4243.36	4128.76	4787.2	3837.78	3158.08	4626.23	6333.64	3715.95	5346.18	6656.68	4289.46	4478.58	4147.17	3770.07
MSTRG.14893.1	chr19	23965323	24081401	-	3987	27.1039	77.1402	51.0408	96.5504	22.3803	335.744	112.958	51.6735	15.8301	191.031	103.532	188.388	43.9879	20.2456	186.82	39.2514	136.725	78.2929
MSTRG.22856.19	chr4	153419150	153469137	-	4145	222.604	131.712	135.964	232.363	95.8392	146.858	106.86	51.9971	164.197	147.765	104.161	122.561	163.179	126.026	128.539	94.8993	108.166	92.5293
MSTRG.10422.1	chr15	61307000	61320113	-	2274	14.9265	24.7022	7.5982	32.3094	15.5499	18.9014	49.5342	39.4383	31.4746	33.3189	13.5523	24.5811	25.6475	24.3371	39.9132	41.6793	54.947	67.0894
MSTRG.1680.1	chr1	146034546	146037996	+	237	220.674	293.822	218.712	396.433	348.523	303.774	202.48	149.968	393.969	276.175	202.552	319.225	385.216	358.813	308.052	376.302	422.361	276.907
MSTRG.18798.11	chr21	17603399	17634263	+	4587	3.3979	8.299	1.1161	29.802	7.2873	6.4421	20.0041	7.2079	109.508	41.4675	133.402	13.5463	28.7991	7.651	28.6132	8.3907	92.1731	140.563
MSTRG.3454.1	chr10	34939846	35021899	+	4185	64.14	218.198	174.268	189.338	91.8207	223.189	169.168	61.3261	281.567	268.581	42.9797	135.368	241.148	142.755	256.207	84.4309	260.805	225.243
MSTRG.23355.1	chr5	39199449	39216579	+	2242	120.344	52.0767	105.99	159.086	118.535	58.9513	19.2546	31.4295	46.87	85.1055	30.0027	32.7014	119.773	187.241	30.0476	101.791	52.9993	55.8821
MSTRG.9003.7	chr14	51955855	52050823	+	8806	106.55	178.584	455.886	444.422	401.55	164.092	159.47	20.5094	603.193	292.042	337.414	670.606	171.965	242.373	707.728	315.245	180.424	208.767
MSTRG.18732.1	chr21	15249967	15270578	-	1069	24.3	43.2102	0.3991	699.58	0.5168	26.1348	457.731	389.122	0.913	130.435	3.6036	13.8628	59.1848	5.3033	41.4432	0.1586	26.6837	158.66
MSTRG.5822.1	chr11	109963006	109991337	-	729	312.623	183.403	498.606	207.676	284.97	131.554	135.51	83.9041	391.382	92.5059	319.089	338.091	171.032	304.404	270.173	302.819	172.119	126.559
MSTRG.5324.1	chr11	65267197	65315301	-	323	136391	123092	140645	149927	176330	130688	93159.5	77170.3	258801	120425	120656	287616	132259	141585	101706	157914	83210.2	75505.5
MSTRG.1895.1	chr1	152188582	152190288	+	297	3.4985	254.784	22.2649	14.9927	13.9522	66.9328	36.5065	17.3941	13.1448	12.6886	39.9093	1278.05	2298.18	12.7256	10.6149	23.406	5.8922	10.0439
MSTRG.4723.43	chr11	10530551	10550734	+	333	25541.9	27412.4	24461	22198.6	34016.6	19116.7	37022.9	43173.3	13521.4	17669.8	25304.3	25014.2	17329.8	27358	15947	25331.3	21045.6	34075.3
MSTRG.29605.5	chr9	9413112	9472346	-	319	85012.5	36381.6	37378.4	27259.2	60742.2	23005.8	27372.9	55569.3	25119	25376.8	41794.1	50204.5	24391.9	53282.7	20108	31152.7	23480.6	14828.4
MSTRG.29614.1	chr9	14249223	14268420	-	1011	59.6103	228.675	137.144	149.749	100.009	84.231	128.495	197.445	109.088	150.278	140.689	63.5183	141.876	135.382	155.096	81.1696	151.112	306.018
MSTRG.29749.1	chr9	33855775	33858059	-	513	16.2038	38.9128	51.9766	42.5318	29.6179	27.7538	22.7009	10.0703	74.1988	32.8639	40.4344	90.2101	29.3261	69.4644	35.9025	33.7118	21.4911	27.4131
MSTRG.8945.10	chr14	49958482	50071041	-	366	447394	229785	274208	170128	256662	149566	159132	307332	164077	166692	275593	271010	173583	321434	136933	265556	224938	75010.9
MSTRG.20465.1	chr3	96273725	96391214	-	468	10099.8	12658.4	10660.6	9481.75	8493.64	9784.54	11337.1	16571.6	3664.86	10488.9	9812.96	9302.89	7459.19	10886.8	7746.85	9653.15	9557.65	12731.2
MSTRG.7673.1	chr12	112653818	112756354	+	482	2897.32	3594.48	3594.88	4009.85	4788.6	2329.66	3586.23	5849.86	3071.77	3748.78	4389.56	4587.54	3767.28	5013.93	2430.05	4265.85	3678.25	2019.34
MSTRG.10847.1	chr15	86147207	86155125	-	1459	92.5832	96.0933	72.3711	67.1433	43.1706	97.5853	73.3507	23.2278	65.3342	64.3019	38.3863	54.3497	107.634	90.1113	75.0599	53.3405	56.9737	78.1321
MSTRG.29213.1	chr8	120143367	120259055	-	6255	29.7351	134.707	432.694	434.817	221.003	158.648	174.977	106.245	622.112	361.014	183.812	249.804	357.151	127.753	323.314	152.04	191.17	119.329
MSTRG.5218.29	chr11	62297603	62299412	+	295	5092.02	6908.5	2997.21	10873.2	5141.14	5764.29	7489.64	4894.27	6669.88	7855.75	5131.97	6952.69	9317.2	4125.41	6141.02	5214.11	8619.45	5731.34
MSTRG.28748.35	chr8	70587586	70602574	+	225	216799	107685	58792.6	88643.8	107373	117604	48294.7	96232.8	126968	49816.8	93903.8	116217	74151.7	73721.7	33908.3	28317.2	33548.5	45194.5
MSTRG.18957.11	chr21	38792602	38799011	+	1105	124.751	112.174	131.076	144.465	118.502	103.321	93.7605	68.4444	162.814	99.082	100.563	136.229	129.993	115.315	115.174	95.7462	108.642	90.0504
MSTRG.19743.1	chr3	15295691	15306000	+	6597	23.8884	20.1613	8.5687	19.3043	15.3684	17.9579	17.9876	19.8592	17.5069	14.3413	14.0145	8.3155	16.9005	19.3971	15.2924	15.2665	21.6992	23.901
MSTRG.22379.1	chr4	89516146	89545128	-	1156	55.429	90.7595	59.6019	100.343	75.9938	62.2789	55.9282	54.6994	223.455	53.3606	75.8759	90.8607	65.7837	109.06	64.5913	67.0282	127.162	67.8299
MSTRG.22106.1	chr4	68200080	68249798	-	5724	0.4841	7.5427	3.7266	0.8168	86.3415	7.0867	10.4532	0.1805	4.6038	9.3558	7.7136	40.5152	69.8836	8.7724	24.437	2.3993	0.7949	0.2233
MSTRG.12998.10	chr17	39657233	39707589	+	512	1282.6	69586.4	7318.02	143364	1218.32	57228.3	107289	29895.3	8007.52	222217	4228.44	22018.7	70401.9	859.982	144755	7985.11	186417	59413.6
MSTRG.29511.12	chr9	3518209	3525991	-	5798	29.0323	16.8545	17.0708	13.7855	13.0551	17.838	13.2633	10.0506	11.7273	12.0416	11.7549	7.892	22.7484	22.303	8.5282	9.7379	17.023	26.5332
MSTRG.8945.36	chr14	50040340	50059457	-	1800	59400.1	25386	31803	23526.1	36924.3	21847	23099.2	44745.6	19495.8	25848.5	40905.4	30249.3	24520.1	46531.4	17945.3	32129.8	26212.3	11697.8
MSTRG.29312.3	chr8	128180876	128231333	-	766	65.5635	872.114	761.351	1221.62	427.365	2518.37	2844.81	239.554	130.813	2126.11	887.045	475.513	224.919	112.779	4508.65	606.708	217.264	173.019
MSTRG.16898.1	chr2	133012130	133013038	+	530	1522.66	555.335	365.045	465.446	693.242	661.959	193.209	299.436	768.523	250.736	739.698	573.935	288.91	489.5	98.6175	190.025	109.622	159.605
MSTRG.4725.3	chr11	10446927	10531595	-	405	27134.7	28874.5	29438.6	24938.5	33471.8	21979	42958.7	44925.6	14115.4	20658.1	28322.9	26181.7	17667.5	30417.9	16789	26114.1	23682.8	35227.2
MSTRG.4723.30	chr11	10502034	10550734	+	647	17104.7	18532.6	17680.8	16314.4	21414.2	14113.5	24328.3	28625.9	9217.44	13803.1	18053	16864.2	11560.9	18996.4	11089	16843.9	15624.7	22289.5
MSTRG.6214.1	chr12	3048612	3048980	-	312	301.952	221.704	143.575	229.777	186.826	276.385	217.518	168.228	670.478	158.293	178.556	316.652	286.672	168.727	344.088	205.96	279.887	398.149
MSTRG.18737.4	chr21	9761625	9829890	-	409	4.09096e+06	2.27048e+06	2.13005e+06	2.11816e+06	2.55293e+06	2.13191e+06	1.1699e+06	1.22136e+06	3.66817e+06	1.2224e+06	2.56144e+06	2.14872e+06	1.61486e+06	1.20556e+06	1.26373e+06	1.02987e+06	1.06536e+06	2.74856e+06
MSTRG.12552.1	chr17	20406768	20420545	+	621	54.1007	88.9604	226.708	93.9323	379.905	126.315	35.5659	5.3241	346.288	129.993	222.364	153.229	196.463	115.202	33.6665	60.6123	74.6776	6.8623
MSTRG.15861.3	chr2	33141297	33141692	+	339	39838.1	23116.8	14066.6	5901.63	16936.3	45389.9	6294.24	12048.6	20594.8	7258.55	8217.59	20369.5	9721.32	7022.24	3269.61	7614.27	4479.26	2558.15
MSTRG.19765.46	chr3	15721350	15854792	-	662	41822.8	23684.6	20219.2	22691.6	22285.6	17983.6	24475.5	34783.9	12148.9	19227.9	24164	22880.5	15291.5	26498.5	19288	22813.3	21263.2	15781
MSTRG.17061.1	chr2	151278902	151385479	-	3116	391.373	371.272	530.473	1020.32	323.863	564.342	430.697	250.013	172.794	781.789	285.39	359.527	1139.23	289.804	476.856	327.62	317.2	433.876
MSTRG.5643.1	chr11	85195005	85251504	+	260	3400.95	2314.94	1136.3	1984.93	2350.29	2231.74	1330.59	1897.93	2201	1716.43	2225.87	1880.91	1262.68	1803.57	996.844	1146.42	1416.15	1298.11
MSTRG.27069.1	chr7	48083183	48092435	-	854	8.1114	49.7399	114.149	22.6812	10.028	192.512	20.6898	3.1456	103.619	52.489	239.074	71.2378	110.041	25.2894	31.8644	11.3166	10.0409	2.7445
MSTRG.9671.13	chr14	106135888	106238531	+	468	189252	6073.29	3083.91	329.68	2138.61	12216.6	5235.01	5951.56	1418.12	7625.21	28951.3	3641.49	3430.81	9925.79	3436.62	13677.4	6633.52	1949.08
MSTRG.20832.1	chr3	129536422	129543619	-	551	38.3443	52.6586	93.2998	58.1857	71.1944	61.4303	42.2706	33.0028	122.221	82.7931	37.6458	69.8333	53.1112	69.0833	65.6484	69.2357	75.2719	53.3653
MSTRG.19249.3	chr22	23242346	23269420	-	1159	36658.5	1904.22	1042.45	259.716	697.667	2568.38	1574.41	3450.52	372.772	1901.46	5567.3	530.07	986.69	2317.4	503.081	1020.52	2758.62	709.819
MSTRG.6573.1	chr12	27065908	27126131	+	505	720.146	458.263	825.369	912.608	856.115	454.819	498.584	373.593	1313.57	696.363	600.868	728.995	683.146	768.194	562.512	681.896	766.878	439.229
MSTRG.30711.1	chrX	3471263	3478202	+	354	23.4818	47.8664	189.811	14.4654	56.1873	26.56	9.6422	0.5837	57.8983	10.6456	61.1068	35.987	27.9439	38.1305	33.2793	34.0059	3.9548	4.2133
MSTRG.4531.2	chr11	1247577	1273994	-	1526	0.227	6498.28	0.5591	23.4896	5.2499	1.5844	34.473	53694.9	1.7055	8.0585	2.136	1.0222	0.4052	3.0075	4.3494	1	0.8027	1.5359
MSTRG.10349.1	chr15	57276302	57330658	-	4433	68.2868	85.5066	76.2688	86.2338	74.2203	60.7203	53.0838	34.4948	111.771	57.1809	55.415	77.7676	77.9158	142.137	75.5341	74.3911	79.9793	79.8849
MSTRG.10966.16	chr15	100107412	100175822	+	3031	166.95	170.012	397.558	314.166	258.39	152.797	126.129	92.9924	277.676	209.861	212.15	317.543	251.71	301.494	255.543	261.402	212.874	127.17
MSTRG.5322.14	chr11	65266516	65317818	+	299	160457	146024	162898	177105	204181	156045	108903	91656.6	306619	139662	141197	337543	155266	166003	119764	182369	97686.4	87486.6
MSTRG.8327.1	chr13	78171726	78182194	-	2557	6.6373	156.774	152.413	348.024	63.7427	143.616	311.661	197.106	636.925	494.191	100.475	199.185	213.34	61.9745	357.683	35.475	273.62	89.2463
MSTRG.6935.9	chr12	52862496	52881774	+	566	8892.05	29253.2	42773.9	25152.1	48201	45843.7	15908.9	1259.57	66423.1	50280.1	68891.7	35057	55775.5	19716.4	19034.5	17689	49746.8	2789.17
MSTRG.24332.1	chr5	134530819	134592088	+	2587	10.9784	50.2462	41.0628	63.7715	13.8821	74.2461	43.2306	25.7205	35.5892	106.187	24.0543	34.0687	71.9351	15.1313	91.5907	19.2031	75.3572	61.3608
MSTRG.6425.1	chr12	13310060	13373408	+	5688	173.361	463.096	125.857	594.844	87.4708	424.632	693.501	388.036	159.406	566.088	74.2379	150.562	395.651	105.65	389.265	70.9144	390.671	327.478
MSTRG.26105.2	chr6	134749386	134803308	-	1567	57.6892	34.0698	250.339	47.5971	298.291	55.8872	17.6825	2.3737	66.4369	110.753	22.1252	163.094	103.372	68.5677	39.9201	111.771	117.708	14.0055
MSTRG.19765.18	chr3	15685534	15878558	-	246	115048	68249.7	58799.5	64972.3	66562.7	50968.7	67326	101469	35003.7	53397.1	69527.1	67472.1	44282.6	74119.3	54980.1	65181.9	61068.3	44089.1
MSTRG.25397.1	chr6	38218466	38264881	+	265	199.972	299.565	147.306	373.029	212.664	291.951	200.786	119.307	337.61	326.331	200.16	316.891	272.19	250.608	378.19	245.049	305.093	294.284
MSTRG.23804.12	chr5	79917703	79947508	+	515	23485.6	25332.1	22164.1	20198.5	28236.4	17334.6	34882.5	38653.7	11526.3	16321.2	21936.2	21487.6	15608.9	24841.4	14023.3	22674	17931.1	28192
MSTRG.15277.1	chr19	48423623	48445079	+	317	31.6856	60.7757	20.8602	52.6753	13.072	81.3534	68.4064	4.5631	18.4732	330.364	190.696	63.1516	3.9007	28.1035	71.1867	21.3944	8.2807	27.5585
MSTRG.19922.3	chr3	33429831	33459700	-	2089	121.697	127.004	142.344	156.563	198.76	105.577	89.8681	69.6391	183.925	124.475	144.971	116.242	132.886	183.25	104.37	135.705	132.192	102.61
MSTRG.16620.1	chr2	98166081	98168350	+	404	49.7244	37.9205	21.12	25.3502	26.6681	41.8912	9.9399	294.107	51.5379	10.8009	33.0066	47.6215	25.5058	36.7525	5.3393	50.3616	22.9578	26.898
MSTRG.23804.29	chr5	79940634	79947508	+	252	47559.4	51357.3	43151.6	40376.7	56917.1	35069.8	65985.9	78729.9	23097.4	32895.9	44159.7	43222.9	31345.6	49733.3	28296.6	44793.7	36100.5	57303.5
MSTRG.6937.1	chr12	52831286	52908808	+	330	58206.7	161535	268788	153593	311858	237729	73048.2	8109.14	428073	271342	394126	221831	300913	116876	109016	103152	254215	15274.2
MSTRG.1406.3	chr1	109605108	109628255	-	544	155.351	213.772	305.067	206.68	275.746	251.352	217.395	91.9254	285.863	209.646	204.269	141.464	201.162	220.338	211.68	112.514	134.788	110.846
MSTRG.4723.9	chr11	10443457	10531348	+	236	45663.2	48831.6	49794.8	42210.3	56396.8	36942	72497.2	75954.2	23807.2	34885.8	47718.6	44341.1	29825.8	51306.9	28418	44053	39983.6	59963.3
MSTRG.29605.11	chr9	9413179	9472376	-	248	109347	46797.3	48070.9	34952.8	78129.8	29580.3	35204.7	71474.9	32301.1	32640.3	53786.8	64575.5	31302.7	68525.1	25864.7	40052.9	30225.5	19072.7
MSTRG.4725.6	chr11	10483369	10531348	-	291	36920.9	39479.4	37183	34158.9	45638.9	29843.5	51749.6	61554.5	19180.1	28207	38495.9	35812.2	24062.5	41469.6	22989.3	35613.8	32368.8	48586.8
MSTRG.23804.24	chr5	79932406	79947494	+	234	51114.2	55176.9	47683.4	43386.4	61186.8	37746.8	72535.1	84653.6	24739.2	35226.3	47321	46473.3	33727.7	53529	30420.1	48228.5	38865.5	61579.4
MSTRG.249.1	chr1	17067011	17242628	+	255	41588.5	49567	33864.7	79373.7	69440.6	28480.7	54118.4	75959.3	14953.8	39095.5	35073.4	72912.8	36109.6	79654.1	18592.4	52972.9	51989.2	44785.7
MSTRG.18737.13	chr21	9826747	9827582	-	616	2.7097e+06	1.50111e+06	1.41037e+06	1.40199e+06	1.68507e+06	1.41233e+06	772234	808170	2.4295e+06	808623	1.69522e+06	1.42e+06	1.06702e+06	796636	835554	680891	705029	1.8222e+06
MSTRG.5322.26	chr11	65266516	65330732	+	1587	30244.1	27527.4	30694.9	33408.9	38477.7	29419.8	20531.7	17278.5	57779.1	26321.7	26611.9	63736.5	29263.1	31294.7	22583.3	34368.3	18418.8	16491
MSTRG.6544.1	chr12	25366821	25412797	-	523	341.72	307.125	395.219	391.218	350.204	285.072	220.749	192.813	631.383	355.729	296.893	363.883	364.099	353.069	303.62	300.847	321.557	288.852
MSTRG.29142.1	chr8	106890305	106895060	+	2476	2.2382	1.0312	26.9655	5.7549	33.2487	1.9529	6.163	0.1669	58.0764	28.4378	19.029	31.9209	14.5659	22.4606	9.7841	37.6627	0.1414	0
MSTRG.24447.1	chr5	140874679	140937850	-	1209	349.794	523.372	461.558	491.504	388.447	713.918	328.996	178.44	462.032	435.076	417.896	427.722	519.733	436.542	411.183	393.374	313.812	198.446
MSTRG.6484.1	chr12	19294695	19306665	+	10717	4.5892	19.1465	16.0626	12.3193	10.5429	10.8036	17.7048	4.2998	22.5854	12.9367	12.4702	20.8631	10.3649	14.6859	15.6375	13.6375	20.3624	12.0882
MSTRG.19765.38	chr3	15720387	15854797	-	422	65694.4	38602.8	33466.7	36712	36516.6	28798.8	38413.3	58319.1	19627.9	30187.7	39846.1	38634.7	24999	42067.7	31207.4	37044.4	34534.1	24777.2
MSTRG.9003.2	chr14	51955855	52043579	+	1778	448.822	724.557	1955.68	1890.07	1721.07	630.04	610.375	82.0526	2693.06	1241.93	1404.8	2873.76	682.589	1026.41	2963.74	1308.92	742.319	875.666
MSTRG.6938.1	chr12	52884309	52911615	+	286	30424.8	60260.1	89573.1	77092.2	97573.8	72755.2	27582.7	4718.81	130606	81380.5	92064.2	89550.3	100668	40352	52639.2	45982	91545.4	10184.4
MSTRG.9752.2	chr14	106993878	107114007	+	203	8762.98	476.817	246.937	155.739	321.163	2970.87	153.309	282.988	107.376	631.182	865.623	327.866	131.977	582.484	131.598	460.209	406.033	75.5732
MSTRG.29604.6	chr9	9389357	9472347	+	241	146369	66432.4	71235.6	83022.9	102933	42393.2	50579.6	98268.3	47016.7	45047.9	77062.1	89894.2	63958.6	91059.6	33624.8	61810.7	45616.7	24446.1
MSTRG.8518.7	chr13	110076468	110086099	-	225	427579	409570	424243	390439	500807	388571	723647	797639	217519	333713	375958	362193	429310	402232	352511	598652	400746	462357
MSTRG.6029.2	chr11	121936268	121972394	-	1148	316.487	503.06	100.338	416.773	115.507	216.219	210.405	146.342	165.5	155.669	244.185	85.6057	229.603	251.151	285.171	252.258	441.919	459.558
MSTRG.3540.12	chr10	47746962	47770871	+	1273	274.8	400.42	644.628	978.011	1331.58	358.744	421.445	105.513	650.666	687.736	1145.97	1036.27	633.153	724.004	655.5	1176.73	876.096	278.52
MSTRG.1599.4	chr1	121484317	121485439	-	444	42.9045	69.5312	62.4562	39.6141	752.855	102.856	118.934	67.4845	59.3513	117.487	708.113	255.889	140.176	90.596	111.366	268.073	104.448	82.0624
MSTRG.12510.18	chr17	19007493	19093558	-	231	2360.02	2105.15	3105.49	2354.6	2581.96	2324.69	2893.57	2514.59	1811.16	2738.17	3668.8	2186.82	3146.61	4045.95	2277.02	2599.78	2687.11	2027.44
MSTRG.18738.11	chr21	9826747	9880101	+	425	3.9285e+06	2.18731e+06	2.05559e+06	2.04334e+06	2.44487e+06	2.23715e+06	1.12194e+06	1.17188e+06	3.52682e+06	1.17875e+06	2.45796e+06	2.06016e+06	1.54722e+06	1.15688e+06	1.2202e+06	988296	1.02494e+06	2.65321e+06
MSTRG.19765.13	chr3	15683865	15780208	-	338	56283.9	39793.4	35518.3	38684.9	37761	27530.4	40484.4	65228	19904	28798.5	41057	40647.3	26025.4	42669.5	30703.5	40320.9	34607.9	26632.4
MSTRG.1968.24	chr1	153028906	153122589	+	309	1624.17	21051.5	37631.3	6277.18	3216.71	55611.9	7308.21	1018.5	20424.4	77382.9	47726.8	25861.6	41067.9	7164.96	14797.1	1476.57	31882.7	591.643
MSTRG.5131.1	chr11	57551778	57556085	+	3434	15.3308	30.8231	20.7473	57.7674	26.9497	36.0632	21.8677	18.4738	46.1378	42.3372	24.6795	34.5237	28.6865	25.1568	40.7813	24.3414	28.2322	22.9579
MSTRG.9667.1	chr14	106053692	106324463	+	733	300684	6503.46	3090.55	547.642	2645.71	41332.9	5686.37	7848.74	1696.79	10152.6	36579.5	3822.14	4525.47	12543.9	5029.68	12197.5	9751.73	2162.43
MSTRG.3.5	chr1	543087	569697	-	283	38380.7	60602	44273.9	43570.8	41107.2	44747.3	54722.9	106237	33238	39251.7	45437.4	35787.3	38846.9	25011.2	66282	46018.3	50162.3	71468
MSTRG.4913.1	chr11	31695433	31708375	+	2464	25.7237	19.9713	28.3954	36.8659	33.9712	14.9363	19.4755	17.2761	33.0086	24.7929	27.7806	37.2466	37.9721	36.2654	21.145	33.2358	49.4316	45.3994
MSTRG.29605.2	chr9	9413097	9479231	-	337	80474.9	34439.8	35385.7	25805.2	57498.6	21779.4	25916.8	52603	23780.2	24022.5	39594.3	47530.7	23090.9	50445.6	19035.9	29494.8	22246.2	14038.9
MSTRG.7990.1	chr13	30259739	30272181	+	744	12.1038	7.7997	34.1184	60.4482	96.1691	30.3298	12.4142	1.3887	66.9032	57.0504	53.7689	21.6656	95.0103	30.8426	158.568	26.2074	30.3426	6.8734
MSTRG.7033.1	chr12	56499474	56584068	-	337	8568.46	10583.8	14587.5	13642.5	14520.2	8999.7	10415.2	11217.5	11641.5	12306.7	12432.5	11431.7	14765.5	15734.8	10072.9	10140.3	14210.8	6975.82
MSTRG.5322.9	chr11	65266516	65301822	+	1854	25806.9	23471	26255.7	28540.7	32903.8	25137.3	17537.9	14754.7	49412.6	22509.1	22741.8	54398.4	25020.5	26740.1	19297.4	29388.4	15736.4	14096.1
MSTRG.22128.5	chr4	71346828	71347570	-	509	0	3747.2	0	0.4374	2.171	0	2.3668	41.0037	0	0	0	0	0	0	0	0	1.3752	3.7675
MSTRG.22200.1	chr4	76006912	76052372	-	963	8.9916	65.0802	52.0543	82.5367	83.1918	6.1371	3.5445	102.999	42.5669	93.7137	50.4647	55.6152	57.3532	88.3059	57.2046	507.948	127.57	139.394
MSTRG.19765.23	chr3	15697235	15780216	-	356	62368.4	39972.1	37389.5	39238.6	40932.2	28965.1	42845.2	66912.6	21721.5	30572.8	45050.8	41149.6	27342.3	44388.6	31936	41703.7	36881.1	26859.3
MSTRG.1757.1	chr1	148003105	148250785	+	354	2897.06	3905.37	2911.65	5583.01	5014.72	3825.4	2767.32	2354.2	4760.52	3375.2	2446.78	3891	4743.48	3174.74	3450.74	3068.2	3381.34	3323.12
MSTRG.7860.2	chr12	127648479	127650668	-	201	12005.3	4240.51	2856.89	3317.46	4197.41	4327.57	3537.22	2840.56	4727.85	2941.6	6837.62	3871.36	2180.83	3740.54	1225.89	1541.98	1594.15	1064.31
MSTRG.6368.1	chr12	11170992	11228153	+	1513	266.005	165.997	263.503	201.598	278.445	129.258	136.953	133.3	505.309	233.87	237.179	242.804	203.499	307.077	220.981	358.488	366.538	232.227
MSTRG.8518.4	chr13	110060027	110121263	-	286	336550	323517	333962	307575	396587	305820	569661	627885	171239	262629	295923	285174	337896	317079	277484	471287	315419	363904
MSTRG.23804.8	chr5	79902623	79952911	+	1006	12138.3	13116.6	11529.4	10475.9	14642.3	8963.78	18149.1	19985.3	5983.74	8443.01	11365.6	11120.3	8382.35	12863.5	7262.4	11755.1	9286.26	14609.8
MSTRG.3.10	chr1	563272	569606	-	241	44937.2	70930.3	51838.3	50939.5	48130.1	52386.2	64080.6	124187	38863.1	45954.8	53213.3	41894.7	45500.6	29281.6	74366.7	51551.8	58772.9	83717
MSTRG.4039.1	chr10	89675711	89677171	+	1429	13.3307	13.9694	15.823	20.8775	24.9383	9.2114	18.9685	7.9533	26.6368	16.5171	23.0176	26.9266	16.1523	29.849	17.9978	21.5943	31.1055	25.6465
MSTRG.19765.54	chr3	15763121	15780208	-	372	35896.3	27329.6	23397.2	26012.5	23803.2	19352.6	28766.3	42091.1	12266.5	21026.5	28574.8	25037.8	17977.2	29696	19247.2	27599.8	25003.7	21806.3
MSTRG.8516.10	chr13	110070909	110148767	+	240	401987	385322	398832	367455	472368	364986	680533	750390	204377	313104	352862	340704	403665	378453	331337	562616	376735	433981
MSTRG.12787.6	chr17	29300013	29361615	-	317	820.547	1055.89	1465.59	1330.93	1361.23	906.752	1123.64	1202.05	903.133	1206.95	1212.41	1250.73	1485.51	1613.82	970.966	1023.72	1630.2	1074.78
MSTRG.1998.2	chr1	154179196	154201378	-	859	336.276	347.233	486.222	474.052	557.976	325.24	364.64	366.375	439.332	445.638	443.972	535.714	464.474	635.154	419.552	589.381	474.067	263.18
MSTRG.21801.1	chr4	16242976	16292918	-	2351	18.8573	28.3361	3.6293	49.0549	26.3211	21.4817	18.1911	38.2345	21.8642	27.925	12.3522	36.3828	38.3947	16.0761	38.6765	57.6227	139.642	99.8758
MSTRG.28548.3	chr8	46841546	46849986	-	967	197.713	2.8805	1.103	0.4605	0.857	1.1112	5.6062	0.2137	0	0	0.3064	2.1509	1.4918	1.6751	2.917	3.8574	0.181	9.4749
MSTRG.13304.9	chr17	58160961	58165617	-	318	38.121	244.528	603.042	304.556	21.7181	351.423	577.101	136.462	33.761	353.65	67.0928	147.163	256.636	60.2749	147.144	31.9907	325.785	9.3806
MSTRG.13208.2	chr17	48391714	48460085	-	1486	186.231	156.829	214.747	153.122	208.399	155.288	92.9613	119.591	231.849	93.9663	175.881	200.677	144.51	215.644	131.313	211.653	98.8051	64.0944
MSTRG.16425.1	chr2	78683578	78769000	-	642	207.706	195.24	1637.38	2.7743	148.024	125.112	1.8765	24.1405	3157.05	25.0247	1226.85	19.0334	21.1865	22.2867	27.6547	172.456	3.8162	5.974
MSTRG.9671.7	chr14	106092110	106238531	+	467	344964	6847.27	4150.22	458.631	3283.11	37840.3	7509.9	8947.57	2234.84	12630.3	46431.2	5529.89	6042.7	16743	4699.63	17719.3	12166.4	2672.33
MSTRG.14037.2	chr18	28923347	29006951	-	851	429.384	1244.88	4549.74	4577.88	4908.95	4574.07	1473.45	205.914	13031.7	4632.52	7299.52	5639.99	10192.9	1764.44	3183.83	1288.86	8823.78	1228.62
MSTRG.11710.1	chr16	57294633	57334178	+	311	6.6821	59.7091	7.5448	47.2486	8.8828	23.3221	36.1543	39.8667	9.4148	79.0823	24.7733	20.0634	25.181	19.0971	33.0789	12.5391	55.1444	46.5886
MSTRG.19767.3	chr3	15732067	15814291	+	289	83073.9	48553.9	41583.3	47020.4	44627	35584.5	51529.6	69006.4	24036.4	38223.3	50853.3	45823.5	31410	55218.3	38070.4	47627.3	45128.6	33724
MSTRG.23981.2	chr5	95284953	95296578	-	8011	43.4945	22.108	26.5741	50.7758	26.8288	35.21	31.5302	7.79	53.9718	50.6567	28.2973	36.7702	33.4688	24.1286	33.575	14.2862	37.2673	39.8168
MSTRG.25820.1	chr6	101261192	101286197	+	655	258.048	257.28	510.972	366.423	309.995	168.974	228.681	100.008	311.426	291.005	190.916	373.906	277.194	438.949	307.03	386.472	172.595	107.35
MSTRG.13042.2	chr17	41429594	41438764	-	1488	20.949	14.1955	7.8845	3.1421	3.7131	22.0252	19.5658	8.4712	31.2652	45.3204	63.1287	14.3273	57.4771	23.4041	18.9568	7.6343	34.106	129.019
MSTRG.9665.5	chr14	106013526	106173902	+	435	183082	4967.89	911.112	614.694	1327.93	46466.6	1997.24	5670.07	1014.89	6237.56	19069.8	1432.62	3131.57	6881.28	2239.84	1587.93	7045.43	1006.59
MSTRG.24390.1	chr5	138855034	138940519	-	737	118.898	191.491	301.3	302.997	159.68	317.843	114.423	55.5158	211.003	361.432	412.525	146.75	320.734	195.605	160.975	200.838	152.679	79.2163
MSTRG.13304.1	chr17	58080100	58165618	-	490	190.849	348.653	822.775	433.468	345.036	404.05	567.527	323.88	516.549	608.388	459.608	482.304	504.702	468.856	274.289	497.925	652.14	201.768
MSTRG.6934.12	chr12	52844460	52946733	+	1239	17651.3	45192.8	68522.9	49892.8	75233.7	60929.6	20855.4	2804.43	106702	72402	90094	63897.2	79566.3	29342.8	31587.9	30491.5	71685.1	5483.01
MSTRG.6935.5	chr12	52840534	52881744	+	604	13771.1	42690.4	72849.9	34356.7	92284	68905.5	20399.3	1462.92	120849	74237	126752	56140.1	85541.2	33928.3	27035.8	25927.8	68654.4	4326.05
MSTRG.18798.10	chr21	17603399	17662761	+	1766	18.4357	57.3069	7.0057	171.708	44.5824	40.4627	130.408	46.2195	576.794	265.955	787.966	78.6146	182.981	45.2487	181.337	49.7323	612.497	849.885
MSTRG.8989.24	chr14	50271115	50379443	+	491	287581	112534	134961	122734	154224	113430	127409	231238	87682.9	131914	187098	138484	106535	174398	84256.9	153658	120958	66551.7
MSTRG.3.9	chr1	556293	569697	-	281	38599.6	60949.9	44531.3	43796.1	41335.9	45014.2	55031	106677	33391.2	39496.5	45711.2	35992.1	39070.6	25159.5	66697.7	46307.8	50460.2	71909.2
MSTRG.8778.1	chr14	25666640	25735917	+	384	63.1378	61.6567	87.769	72.4743	67.6247	40.5752	29.2812	37.6692	49.1389	63.5319	47.8444	48.0706	66.0121	95.6122	58.7661	72.8538	47.8513	41.0612
MSTRG.15146.1	chr19	43827708	43833524	+	377	66.1476	190.867	556.195	168.9	87.9324	295.713	123.028	43.8498	70.7621	88.9126	66.811	141.373	208.82	115.29	84.5044	38.6773	461.404	11.8689
MSTRG.24247.1	chr5	131744369	131768958	-	220	451.837	232.119	313.181	362.298	341.551	232.004	121.384	179.403	252.873	226.292	206.082	198.536	243.557	577.968	176.487	399.985	262.499	221.791
MSTRG.10792.1	chr15	82690876	83144202	+	3761	560.929	1300.76	1529.94	1314.71	1157.61	1048.12	1465.35	854.975	1215.7	1189.74	1063.5	1197.84	1514.99	1270.22	1266.14	946.165	2384.43	1973.59
MSTRG.23804.1	chr5	79874501	79947513	+	261	46373.2	51256.6	43981.5	40002.9	55756.8	34234.1	75326.1	76354.7	22783.3	32240.3	43470.3	42431.8	34325.6	49633	27717.6	44813.3	35415.5	58195.4
MSTRG.31413.1	chrX	129630568	129686145	+	416	79.9283	102.11	126.654	115.067	136.135	71.6793	112.459	86.4321	105.577	101.556	88.328	91.8706	127.318	93.449	87.3515	99.448	118.629	75.2931
MSTRG.17898.1	chr2	230753382	230795489	+	1624	81.0439	118.918	113.749	143.812	67.7027	121.581	92.7273	46.4436	106.174	110.286	118.056	157.049	108.754	112.707	115.353	99.7049	97.6289	94.5977
MSTRG.29605.4	chr9	9413111	9447133	-	271	99978.1	41571.6	43278.7	32039.8	69405	27044	32152.4	65340.1	29281.2	29829.8	49143.1	58999	28655.9	62432.4	23636.5	36633.6	27602.1	17424.1
MSTRG.5959.1	chr11	118618950	118672631	-	2503	302.352	273.109	303.392	421.088	572.485	249.639	244.825	250.893	455.7	326.478	373.871	350.251	402.293	406.402	301.693	396.679	348.74	265.258
MSTRG.8838.1	chr14	32839582	32844154	+	2868	21.4963	35.0445	13.7597	4.8906	3.4676	45.9903	0.7701	0.2882	5.218	0.2766	8.369	7.796	1.7246	4.7065	7.1162	3.488	0.9153	0.4458
MSTRG.19765.53	chr3	15763115	15780233	-	504	34443.2	22575.9	20464.4	21485.3	21575.2	16500.3	24914.5	35359.6	11509.3	18539.6	25944.4	20802.1	15735.8	25647.6	16482.8	23581	21815.5	17595.1
MSTRG.15634.1	chr2	11724849	11824113	+	200	784.497	412.012	292.237	264.943	549.746	237.743	249.978	446.347	183.813	235.037	422.265	431.579	147.352	508.882	178.373	344.188	276.499	127.845
MSTRG.9665.11	chr14	106090706	106235894	+	424	410671	7321.61	4197.31	477.838	3614.76	60453.8	8133.24	8869.05	2364.04	13417.7	47412.9	4337.62	6716.28	16437.2	4851.04	17587.3	13621.5	2945.35
MSTRG.16798.1	chr2	114669364	114670641	-	1257	17.3591	18.8355	23.4185	33.8301	20.8784	22.8672	16.7721	4.1098	18.8936	29.507	16.2661	22.3378	31.4786	16.9667	30.2287	18.0746	16.1495	23.7314
MSTRG.8945.35	chr14	50038731	50096386	-	327	363542	165184	201065	148116	233171	135742	136577	302290	123104	148384	243906	203268	153768	308941	101238	215971	174012	76891.2
MSTRG.6497.4	chr12	20665401	20704508	-	451	40601.2	29565.6	18698.1	23137.9	28670.4	21268.7	11183.9	8924.1	20668.4	11262.5	20023.4	33006.9	13354	20614.2	9272.83	7113.23	7136.55	19099.2
MSTRG.21008.1	chr3	143075494	143107648	-	4598	19.6605	15.5991	9.3249	55.4424	18.8055	20.7407	22.882	10.022	20.0238	54.0074	26.8099	24.9357	46.3896	16.7333	42.7631	18.8062	42.5128	60.1965
MSTRG.23010.1	chr4	177671616	177727600	+	11612	44.1446	13.9328	56.8183	26.9194	47.557	11.6366	2.7839	2.2067	57.799	4.4923	49.9917	84.4758	10.0984	71.7222	12.6318	159.695	7.9422	7.9453
MSTRG.20465.4	chr3	96319863	96337052	-	458	10298.4	12861.8	10603.2	9653.77	8647.72	9968.26	11548.7	16842.2	3731.39	10690.2	10000	9467.41	7597.3	11025.5	7897.15	9838.38	9705.96	12984.5
MSTRG.15539.1	chr2	38814	71006	-	2854	22.8153	52.2146	60.0921	85.5771	88.1807	96.0086	33.9802	13.5396	83.8981	86.7319	80.7785	124.984	61.5227	59.5926	57.6155	63.5666	66.3452	26.9516
MSTRG.29620.3	chr9	14674827	14693343	-	2872	29.064	46.7956	83.4085	46.9003	75.7006	47.6099	46.0017	31.3705	60.4902	91.506	61.5971	48.7929	60.6348	85.2567	64.7073	43.8045	82.2594	47.5559
MSTRG.16713.1	chr2	110279896	110376563	+	1050	510.628	900.623	741.919	1057.65	790.613	1040.26	662.019	308.979	865.696	1061.61	900.832	1009.99	993.729	710.39	1031.44	882.632	956.162	594.782
MSTRG.28387.1	chr8	28035147	28102606	-	631	59.8301	139.787	136.236	194.414	88.8742	245.646	151.146	60.5845	157.253	313.075	239.033	184.175	221.11	102.68	112.547	80.6104	252.376	196.19
MSTRG.4723.5	chr11	10426754	10531579	+	729	15078.1	16045.5	16362.4	13857.8	18598.8	12215	23865.1	24960.1	7849.05	11480.8	15741.5	14549	9820.91	16905.1	9328.84	14510.4	13155.7	19915.3
MSTRG.6916.5	chr12	53433926	53450670	-	661	556.475	850.519	1037.52	1079.19	723.025	728.69	727.506	967.874	985.351	1039.43	1051.26	1109.18	1350.32	837.255	746.55	650.5	1203.81	735.929
MSTRG.1933.1	chr1	152783696	152785585	+	847	0	24.1163	1.7629	0.2629	6.8493	0.3172	0	0	3.841	0	14.344	102.829	18.9784	0.3187	0.1959	0	1.2397	0
MSTRG.16036.1	chr2	47402403	47410506	+	294	124.877	120.007	113.912	196.136	136.248	79.4943	120.198	196.099	189.224	121.435	111.878	152.986	84.8179	160.693	154.64	143.022	110.714	131.178
MSTRG.9667.2	chr14	106053890	106231942	+	439	399330	10029.8	4193.84	815.505	3748.62	61517.6	7768.89	10274.7	2364.04	14803	49909.7	3943.64	6777.38	15218.2	5654.78	16636	14001.5	2938.87
MSTRG.6935.7	chr12	52840612	52940690	+	430	56788.7	147633	244370	157355	283105	206376	65233.8	8413.22	378953	242913	333495	218633	269634	104507	101321	101094	232713	16514.8
MSTRG.30675.9	chrM	646	1435	-	633	1.35625e+06	1.38226e+06	1.3663e+06	1.25564e+06	1.49934e+06	1.41869e+06	2.23901e+06	2.09178e+06	841904	1.32334e+06	1.45102e+06	1.10626e+06	1.33081e+06	1.23039e+06	1.23052e+06	1.65651e+06	1.43998e+06	1.47132e+06
MSTRG.30675.12	chrM	646	1435	-	575	1.49306e+06	1.52168e+06	1.50412e+06	1.3823e+06	1.65058e+06	1.56179e+06	2.46486e+06	2.30278e+06	926827	1.45682e+06	1.59738e+06	1.21785e+06	1.46505e+06	1.3545e+06	1.35464e+06	1.82361e+06	1.58523e+06	1.61973e+06
MSTRG.8993.1	chr14	50313778	50405994	-	327	457261	194916	226394	183808	230410	161147	198293	360797	145677	202191	278375	219395	155936	280078	122516	233836	185517	100331
MSTRG.2807.2	chr1	218772024	218772592	+	325	5.3286	5.7137	87.9501	0.685	37.4006	3.3063	0	0	5.0051	5.4926	83.8831	3.9998	15.2187	9.1372	5.616	2.0868	0	0
MSTRG.6937.2	chr12	52908608	52909469	+	626	512.341	833.182	1125.17	1192.87	1313.31	733.813	320.423	67.6704	1486.35	864.03	968.978	1413.73	1417.26	686.553	798.627	739.143	1098.36	274.342
MSTRG.17216.1	chr2	165695113	165735680	+	1130	25.4403	32.0448	78.7178	53.1974	52.0727	28.5277	53.4836	33.8308	34.5486	65.2954	29.6326	51.7675	55.9899	47.7812	95.4453	56.1168	84.5571	62.9795
MSTRG.22088.1	chr4	57325857	57326305	-	287	290.843	387.405	768.518	412.7	411.975	355.685	291.034	144.722	413.751	320.667	606.075	357.823	567.994	702.658	529.582	966.498	340.242	186.347
MSTRG.12510.5	chr17	18930285	19093558	-	234	4040.82	3204.04	4783.11	3697.36	3946.66	3876.85	4515.96	3617.12	2894.63	4344.91	5882.2	3438.73	5013.01	6163.02	4027.65	4182.25	3877.65	3561.26
MSTRG.9665.6	chr14	106013526	106235897	+	456	410570	10764	4233.49	892.517	3745.79	62451.3	8197.86	10967.4	2480.66	15272	51428.9	4211.69	7025.92	16289	5999.97	16957.7	14085.1	2983.04
MSTRG.17005.1	chr2	144074172	144169773	-	248	4163.26	1271.98	2072.91	3166.35	1692.06	1905.36	603.976	1154.03	505.053	1822.68	856.718	619.567	3219.27	2997.9	714.561	947.569	1462.8	1429.66
MSTRG.4725.10	chr11	10506898	10531585	-	1040	10418.7	11123.4	10452.5	9634.57	12938.3	8422.76	14718.4	17454.5	5286.98	7958.92	10795.7	9986.03	6748.54	11448.8	6457.47	10059.6	9160.2	13637.6
MSTRG.9665.1	chr14	106013526	106235933	+	492	380536	9976.41	3923.73	827.211	3471.71	57884.5	7598.02	10165	2301.14	14154.6	47665.8	3904.04	6511.83	15097.7	5560.95	15717.5	13054.5	2764.77
MSTRG.23803.24	chr5	79946319	79947498	-	402	29687.5	32057.9	26886.3	25167.8	35544	21881.8	41246.5	49151.6	14394.8	20470.3	27509	26925.5	19576.7	30996.8	17667.6	27907.1	22507.4	35831.5
MSTRG.1968.25	chr1	153028906	153043334	+	325	730.012	7046.43	10121.5	2686.76	453.907	16003.3	2837.56	527.097	6229.38	22683.8	9746.86	5976.52	11408.3	2360.73	5131.51	560.3	8411.81	111.454
MSTRG.981.1	chr1	61731288	61737675	+	5325	3.8376	6.0155	7.3708	8.8638	5.4473	4.4394	7.4281	7.1015	8.9199	6.4438	3.005	2.3436	12.8877	3.9544	11.3423	7.4825	12.5868	17.4061
MSTRG.1685.1	chr1	146216855	146223897	+	739	252.62	244.683	199.168	424.193	245.975	239.191	132.589	138.973	279.989	177.14	129.918	252.6	400.181	321.838	197.138	237.692	234.674	186.548
MSTRG.3106.1	chr1	246395450	246397033	-	515	36.9895	11.2679	21.5383	21.1833	39.6948	16.1703	19.1039	23.2723	48.642	18.1013	25.8926	22.7174	17.2072	23.5891	19.6536	22.7165	38.3979	46.3385
MSTRG.23804.26	chr5	79934132	79947544	+	452	26526.9	28647.2	24757.9	22527.6	31763.7	19556.9	37683.7	43908.3	12909.7	18361.7	24646.9	24125.9	17494.1	27763.3	15786.3	25015.8	20162.8	31965.9
MSTRG.9477.3	chr14	92335856	92370660	-	680	114.603	155.998	19.7627	93.9676	52.407	113.775	137.302	122.162	55.9764	82.2542	57.9579	19.1167	153.656	82.9742	189.841	75.5498	119.411	228.742
MSTRG.466.10	chr1	28835071	28877443	+	209	2986.29	2805.42	3703.87	3498.34	4463.69	2710.78	2440.17	2985.93	1930.21	2956.17	3581.44	4486.96	2025.37	3282.19	2055.44	4020.54	3154.17	1032.75
MSTRG.30677.2	chrM	648	3229	+	2294	1.91317e+06	2.02386e+06	1.84169e+06	1.64668e+06	1.6148e+06	2.01948e+06	2.59361e+06	2.68129e+06	1.09563e+06	2.00916e+06	2.15701e+06	1.63101e+06	1.74287e+06	1.66052e+06	2.05368e+06	1.99616e+06	2.04747e+06	2.40807e+06
MSTRG.6935.8	chr12	52840859	52881774	+	607	12143	39705	63854.8	31981.4	79545.7	63060.8	19317.4	1400.2	108019	69478.1	112351	50256.9	77228.4	29253.9	24142.9	23416.1	63612.3	4171.62
MSTRG.10786.3	chr15	83952630	83953341	-	272	10.1869	14.5075	20.3901	18.8263	35.5474	18.765	8.8582	0	77.745	16.0425	21.7887	43.0127	17.4264	36.723	20.741	30.544	9.6507	2.3501
MSTRG.23804.13	chr5	79922610	79952427	+	208	58624.1	63354.1	55393.4	50462.4	70678.6	43291.7	83154.2	96595.3	28849.9	40715.7	54784.8	53661.2	39031.6	61887.9	35061	56695.9	44812.4	70300.2
MSTRG.30675.1	chrM	1	5826	-	1357	3.29272e+06	3.58316e+06	3.19714e+06	2.88952e+06	2.80933e+06	3.60308e+06	4.51834e+06	4.9994e+06	1.89509e+06	3.56463e+06	3.75181e+06	2.83735e+06	3.12341e+06	2.9308e+06	3.56433e+06	3.56795e+06	3.61172e+06	4.19709e+06
MSTRG.4723.31	chr11	10503058	10531348	+	328	32441.3	34804.5	32720.6	30178.7	40325.5	26217.4	45816.5	54549.1	16558.3	24878.2	33731.5	31307.9	21118.2	35728.2	20228	31408.7	28618.2	42918.9
MSTRG.29604.3	chr9	9389354	9462259	+	257	137243	62286.6	65662.7	77848.1	96517	39747.6	47383.1	92133.5	44084.5	42233.3	72262.1	84278.5	59947.9	85140.5	31524.4	57956.6	42768.6	22918.3
MSTRG.227.1	chr1	16823982	16896411	-	411	11266.3	20571.6	11391.7	23227.8	19220.8	7178.65	10013.9	20208.7	4462.84	10718.3	9793.91	19953.3	9869.59	22759.7	5830.49	13991.8	13199.9	12190.3
MSTRG.8945.39	chr14	50041757	50105007	-	404	272960	122299	145553	112517	174798	105314	109197	209219	89537.5	119780	195685	142601	110986	226535	84300	151598	124452	54778
MSTRG.24809.1	chr5	178997612	179041932	+	331	1096.62	1222.31	1587.27	1475.08	1436.36	955.24	975.418	737.919	1333.77	978.535	995.513	1441.32	1466.26	1513.75	1184.55	1197.1	978.092	865.816
MSTRG.16733.24	chr2	112233122	112252663	-	4719	132.186	126.315	56.5487	37.7438	42.5592	74.9721	14.8919	14.144	66.5282	24.2518	38.9325	40.1634	37.0772	89.9879	28.7622	51.882	11.4219	8.308
MSTRG.5218.28	chr11	62295614	62299413	+	287	12449.5	16796.7	7766.93	26518.3	13275.6	13772.5	18258.9	12147.3	16392.5	19433.5	12188.6	17957.3	22642.2	10084.6	14619	13059.5	20944.4	13858.7
MSTRG.4723.34	chr11	10514038	10552076	+	1911	5773.69	6257.26	5961.79	5511.15	7238.7	4756.44	8232.1	9685.8	3091.43	4663.3	6076.01	5685.72	3893.64	6407.79	3746.53	5686.11	5273.42	7518.26
MSTRG.9228.6	chr14	69254379	69308653	-	1266	670.552	759.246	629.995	1270.78	633.246	1606.93	714.169	278.135	1076.99	984.198	524.774	1049.81	1558.18	803.281	1484.05	603.338	816.386	1135.56
MSTRG.30043.2	chr9	85596165	85655155	-	1617	8.9963	85.699	6.9917	34.6973	88.1553	22.9262	27.8145	354.116	13.8825	48.9419	89.0628	124.286	23.8331	87.6506	30.5792	104.331	23.1601	32.5475
MSTRG.29923.1	chr9	68259890	68328634	-	465	110.983	205.663	188.082	523.805	258.431	127.097	330.757	157.315	429.58	616.784	229.414	324.286	233.121	462.712	457.818	386.502	769.244	424.316
MSTRG.23995.1	chr5	95657181	95672392	-	5273	2.7588	5.4145	4.0858	6.8823	12.3117	5.8587	3.0462	3.9581	10.7971	8.1624	4.3834	15.6298	12.5067	4.403	4.5628	10.3859	37.7677	17.8202
MSTRG.3.2	chr1	529839	579474	-	750	16905.4	27153.9	20024	19682.7	18065.6	19798.1	25219.5	45634.9	14551.5	17868.1	20344.2	15645.7	18340.9	11501.5	26498.9	18377.5	22552	32393.3
MSTRG.28681.1	chr8	62115784	62139397	+	263	56.6286	68.8415	175.191	107.511	113.443	41.8786	45.0432	71.4998	94.0126	119.157	81.1236	174.973	117.54	100.595	51.1033	74.1381	95.817	48.6101
MSTRG.9671.6	chr14	106092110	106237957	+	508	317103	6294.18	3815.26	421.615	3018.13	34785.2	6903.78	8225.01	2053.18	11609.3	42680.3	5083.58	5554.19	15389.5	4320.33	16289.2	11183.4	2456.65
MSTRG.970.1	chr1	61540377	61612403	-	3251	93.4341	211.699	246.25	339.474	191.024	125.766	239.325	223.105	282.903	241.478	105.551	118.198	260.16	145.237	270.864	263.844	450.982	438.143
MSTRG.12819.2	chr17	33431207	33478374	-	440	6277.7	8382.67	3166.23	4532.26	4038.96	4573.52	3357.68	9489.58	2897.68	4226.97	8476.28	6009.85	4288	5315.22	2395.02	1723.25	1493.86	1506.53
MSTRG.29366.1	chr8	131337327	131395348	+	861	735.353	732.753	739.283	735.155	694.646	597.176	338.141	103.201	875.868	418.802	498.351	603.92	617.781	834.348	709.578	742.793	438.616	361.806
MSTRG.26999.1	chr7	39972347	40033486	-	1505	121.282	146.52	156.334	185.362	150.884	150.65	123.14	99.8199	185.905	162.101	134.282	172.922	113.519	139.018	122.048	125.839	178.72	110.855
MSTRG.27805.1	chr7	128891234	128894095	-	470	20.634	24.1997	19.9696	42.6334	36.442	14.2891	22.2146	13.1899	58.8368	44.7328	54.2214	32.0836	34.2016	29.8683	27.89	40.7643	75.5848	77.9762
MSTRG.15359.2	chr19	51833617	51835893	-	1989	2.7862	33.1432	22.4144	28.6557	3.7501	57.806	40.1773	17.2462	46.7799	71.2002	42.609	41.4359	96.0493	10.3154	29.8654	8.6097	58.3331	11.4625
MSTRG.7759.1	chr12	120668634	120729699	+	572	285.199	311.657	190.936	299.709	293.158	231.534	239.749	276.005	240.018	189.675	223.799	265.897	188.792	459.222	171.44	276.557	183.26	131.868
MSTRG.4725.4	chr11	10475763	10531595	-	1166	9420.83	10016.6	10220.9	8657.6	11618.6	7629.39	14918.2	15600.4	4897.57	7170.31	9830.61	9089.09	6133.1	10556.8	5826.83	9066.01	8222.56	12231.3
MSTRG.8989.76	chr14	50320337	50406629	+	951	156565	67006.3	77826.3	62512.3	78925.3	54986.7	68153.3	123988	49993.5	69460.1	95649.2	74795.3	61006.8	95687	41677.7	79850.9	63763.2	34101.5
MSTRG.27869.1	chr7	131007547	131069814	-	2115	269.061	204.133	232.676	256.011	138.584	189.379	225.184	166.584	271.188	230.041	200.913	210.08	223.918	280.175	259.051	269.758	262.623	202.798
MSTRG.5643.4	chr11	85195011	85205023	+	262	2764.24	2048.32	1090.98	1656.21	2160.48	2032.2	1121.18	1635.79	1871.29	1396.73	2021.13	1735.57	1064.26	1663.06	664.345	968.768	1023.28	897.84
MSTRG.23804.6	chr5	79902606	79950928	+	200	61048.7	65957.9	57971.8	52682.4	73621.7	45083.8	91274.1	100515	30077	42460.4	57151	55915.5	42147.8	64682	36519.1	59113.8	46673.2	73476.6
MSTRG.1909.8	chr1	152658599	152671918	+	595	0	32.3797	6.0946	0.7484	14.3931	0	0.6749	0	17.4969	1.0001	101.598	430.4	59.5746	9.5281	0.8366	0.5699	4.1176	1.4324
MSTRG.18737.6	chr21	9761632	9829303	-	588	2.84558e+06	1.5793e+06	1.48162e+06	1.47334e+06	1.77576e+06	1.48291e+06	813755	849549	2.5515e+06	850275	1.78168e+06	1.4946e+06	1.12325e+06	838557	879020	716357	741038	1.91184e+06
MSTRG.9415.14	chr14	81806625	81879361	-	786	200.058	269.92	432.866	308.752	588.007	248.471	410.001	88.0727	1457.79	298.525	804.153	722.409	283.172	569.809	280.558	514.476	241.793	202.231
MSTRG.6247.2	chr12	6484249	6493155	+	655	1.5864	13.8208	10.0957	12.9166	9.7005	6.152	8.8897	45.7452	12.4173	13.9295	15.3818	15.4802	14.4732	3.7094	8.1064	13.7194	25.6487	9.1085
MSTRG.12352.1	chr17	11875073	11880258	-	428	254.102	194.698	442.074	339.163	750.017	361.529	399.226	4.3453	287.327	563.518	536.572	829.774	876.349	308.44	1542.59	591.446	240.419	11.4503
MSTRG.12510.3	chr17	18913377	19093914	-	577	1669.35	1311.86	1963.8	1525.3	1634.54	1591.33	1848.13	1476.94	1218.45	1783.72	2448.16	1431.06	2058.72	2561.62	1651.23	1723.72	1598.35	1450.9
MSTRG.9003.8	chr14	51955855	52050803	+	5461	171.688	287.971	735.01	716.479	647.46	264.553	257.039	33.0718	972.604	470.78	543.817	1081.27	277.185	390.733	1140.99	508.279	290.747	336.565
MSTRG.15674.1	chr2	17614865	17623244	-	756	21.9909	14.1237	24.5478	60.6667	230.577	10.3048	13.0139	4.3734	92.0916	72.4111	58.4029	140.311	81.2351	65.7055	41.043	117.519	114.12	32.9758
MSTRG.19765.24	chr3	15697313	15814307	-	278	93380.4	57644.9	50327	55099.6	55404.9	41016.2	57339.4	88491.9	29501.2	44864.9	60206.5	58607.6	37150.4	63657.1	46542.2	55941.3	51392.5	36399.7
MSTRG.4723.10	chr11	10447749	10531763	+	744	14773.7	15725.8	16031.7	13653.5	18227.2	11966.2	23419	24469.3	7687.74	11249.9	15476.3	14257.4	9624.57	16567.9	9144.99	14225.6	12897.5	19185.9
MSTRG.9671.4	chr14	106092059	106238197	+	799	201629	4002.1	2425.72	268.061	1918.91	22118.2	4389.64	5229.42	1306.22	7382.15	27137.4	3232.11	3531.84	9785.6	2747.05	10356.6	7111.67	1561.92
MSTRG.4386.1	chr10	120300695	120301458	+	373	0	1.8669	0	14.9223	0.7406	2.1606	6.9979	0.554	0	21.8018	0	1.394	17.6803	0.7238	27.5805	0	12.6675	0
MSTRG.17930.1	chr2	232071926	232121119	+	233	310.68	190.278	171.199	164.353	215.787	228.283	102.547	148.995	513.831	80.0184	174.235	175.185	163.631	464.616	217.202	420.602	178.755	130.771
MSTRG.1963.7	chr1	152975175	153005174	-	675	463.861	22671.7	10399.2	30620.6	1943.6	17182.3	52471.1	17992.9	7621.95	88230	9644.87	13559.4	24994.8	2412.88	40096.3	4295.28	57986.2	17332.3
MSTRG.1907.1	chr1	152538130	152539248	-	690	32.6278	242.212	117.785	67.115	372.743	174.029	14.5497	20.3647	1018.43	391.513	1404.33	933.695	579.133	162.369	21.8832	31.2071	136.702	0.9264
MSTRG.18729.1	chr21	15237936	15260521	-	3022	9.3981	13.9794	0.2118	273.844	0.3657	9.7783	101.655	129.032	0.5383	44.368	1.5689	4.0435	22.5727	2.2333	14.6601	0.0561	10.1919	56.7587
MSTRG.14014.1	chr18	26736693	26755470	+	3106	1.1151	0.4484	0.1374	0	8.0937	0.5189	0.1293	0	1.0474	0	0.6678	6.9475	0.1991	43.2846	0.2671	8.6249	0.2817	0.1372
MSTRG.23803.1	chr5	79869303	79995775	-	306	40214.7	44591.2	38463.1	34863	48740.8	29771.2	65145.7	66064.1	20115.4	29102.7	37982.1	37143.4	30103.4	43362.7	24249.3	39249.9	31213.9	50417.2
MSTRG.6935.6	chr12	52840583	52863073	+	493	6576.55	17964.5	34746.9	12407.4	51121	32734.9	7759.36	304.305	68570.1	29710.5	69467.8	25448.2	41613.6	17938.6	11099.3	10559.6	28100.7	2907.41
MSTRG.21429.1	chr3	185303873	185387561	+	2826	55.7651	61.2742	141.302	87.6068	180.161	55.4192	50.6582	53.8177	208.024	123.245	93.7423	139.01	60.1632	162.876	78.3842	173.99	43.7808	41.7704
MSTRG.17081.1	chr2	154313782	154352621	-	7518	9.214	1.0498	2.6387	14.4814	1.5801	8.1112	0.9882	2.3638	124.629	1.3455	153.681	96.7951	41.3379	68.6939	2.5602	10.5095	30.9589	5.47
MSTRG.24883.2	chr6	3154694	3225875	+	294	315.726	600.826	700.882	493.748	1184.89	1563.39	297.081	267.089	2079.25	575.466	941.39	543.852	1129.97	386.581	475.773	239.332	302.38	336.281
MSTRG.333.10	chr1	23636708	23674957	-	348	1612.35	1746.23	2224.45	2330.69	2137.79	1236.65	1484.54	1127.63	2298.83	1953.8	1759.22	2178.52	1722.72	2450.62	1796.12	1959.58	1616.23	1203.14
MSTRG.30004.1	chr9	74794957	74799325	+	2825	0.4904	0.0822	0.0755	0.8669	0.1956	27.4817	0.1421	0.3657	1.0365	0.8425	4.0909	3.4051	14.9549	1.7201	6.1672	1.0203	0.1858	0
MSTRG.12510.13	chr17	18967213	19093558	-	381	2110.86	1624.23	2550.79	1890.4	2138.98	1950.96	2442.63	2021.41	1596.78	2350.97	3268.14	1875.87	2461.14	3279.25	1705.44	2099.13	2049.92	1560.31
MSTRG.2722.1	chr1	207047431	207102669	+	258	747.753	3811.97	611.825	415.079	273.042	296.749	193.003	4612.61	186.625	374.393	558.196	636.869	360.252	1217.98	823.208	605.913	150.581	135.443
MSTRG.23803.17	chr5	79927448	80005269	-	1844	6625.66	7178.83	6251.87	5716.83	8010.92	4908.14	9394.67	10938.6	3297.61	4784.88	6213.21	6094.91	4439.35	7001.64	3980.83	6446.05	5130.21	7980.7
MSTRG.8167.1	chr13	49155352	49173623	+	333	71.7675	99.6789	343.99	61.5104	202.421	70.9908	10.2503	0.6205	91.8358	44.672	176.194	248.276	61.2689	167.005	10.9622	54.9894	16.8167	54.3884
MSTRG.17442.1	chr2	179518480	179527677	+	677	250.686	142.632	20.1654	106.552	878.545	2220.11	1889.52	1209.03	1365.73	34.278	84.4771	45.6995	195.432	290.7	70.8319	328.332	49.1135	1125.17
MSTRG.1253.1	chr1	90349213	90378128	+	2969	52.8459	49.7231	98.6451	54.3667	57.6887	54.831	37.0598	24.0816	102.564	101.744	87.3309	63.3988	79.4776	76.8338	84.1655	58.706	53.6963	40.1892
MSTRG.6132.5	chr11	130098966	130154234	-	3330	96.002	122.751	88.7198	262.757	125.6	131.656	116.311	94.3853	109.714	241.229	68.6979	82.8369	157.752	119.903	227.964	132.789	187.191	126.245
MSTRG.6097.11	chr11	128941169	128983224	-	2088	36.8252	132.846	80.7071	89.6748	225.449	122.481	64.6206	50.5719	261.451	113.611	149.866	147.177	121.698	133.948	117.771	81.852	124.544	69.392
MSTRG.7310.1	chr12	76934136	76975726	+	404	394.366	290.724	356.928	356.556	324.804	337.125	327.022	168.792	455.788	283.769	238.381	306.966	337.696	366.857	251.767	283.704	396.78	401.36
MSTRG.29675.11	chr9	21580985	21592078	-	10181	0.7825	1.0488	17.9558	0.8091	4.5314	0.8707	0.3944	0.1218	9.0752	3.721	18.2785	4.7243	0.2024	0.3182	0.1304	15.2381	0.8594	0.1674
MSTRG.17611.1	chr2	203227308	203290547	-	715	224.768	315.877	286.405	302.356	256.163	272.769	229.71	122.54	459.562	235.793	285.136	375.982	263.733	508.589	357.383	371.351	317.691	380.852
MSTRG.4723.12	chr11	10471129	10531364	+	502	21467.2	22947	23405.2	19840.8	26507.7	17362.3	34080.4	35705.5	11185.8	16399.3	22428.1	20837.9	14021.3	24113.4	13353.9	20705.8	18796	28183.5
MSTRG.23991.1	chr5	95500403	95507763	-	1909	14.3332	1.9455	2.2348	3.3822	5.0649	3.0959	7.7832	2.7062	14.3153	28.1567	32.9079	5.1752	11.3353	1.8384	59.0178	2.2204	5.5919	4.4646
MSTRG.19765.12	chr3	15681952	15780221	-	232	96572.2	61869.8	57774.4	60669.7	63451.5	44748.7	66253.2	103527	33827.6	47384.4	69553.7	63559.1	42434.3	68673.2	49311.3	64634.6	57190	41705.6
MSTRG.9228.9	chr14	69254390	69308653	-	373	2274.06	2574.47	2138.27	4308.37	2148.56	5451.94	2421.27	941.247	3651.93	3337.81	1778.75	3560.37	5283.66	2722.8	5028.55	2043.7	2768.08	3841.05
MSTRG.6.5	chr1	566169	586534	-	532	15922.6	25045.3	20716.1	19315.8	16021.2	19912.9	24352	32229.6	13723.9	18119.7	19701.2	14450.8	17707.9	10743.7	28270.4	18410.3	23582.8	33770.7
MSTRG.5312.35	chr11	65192501	65226608	+	15607	946.393	1526.17	505.24	910.336	596.406	2480.62	980.655	361.144	1169.65	1629.81	594.247	2042.92	1258.78	654.905	2035.05	895.119	632.428	656.412
MSTRG.17693.1	chr2	210299710	210325332	+	6932	4.4968	10.3804	14.4321	77.2113	33.0373	18.6014	15.1487	32.463	10.0904	10.8442	21.502	15.5272	16.2919	16.863	27.3116	17.8552	36.9336	7.9918
MSTRG.19765.2	chr3	15658366	15878558	-	278	102041	60550.6	52204.6	57639.2	59173.1	45312.5	59649.9	89920.6	31311.6	47415.5	61641.2	59892.6	39311.4	66453.8	48739.8	57911.3	54305.1	39178.1
MSTRG.12998.6	chr17	39639020	39756150	+	913	2806.89	42213.9	15012.9	84684	16615.8	36683.3	61256.3	17099.9	24650.8	129133	15227.5	21742.4	47955.6	4992.7	83099.5	9137.72	110368	33865.5
MSTRG.28748.25	chr8	70545475	70650884	+	519	99702.5	52308.2	26874	42395.3	48772.4	53763.4	22344.1	50790.2	59326.6	23049.5	42813.2	52196.9	33182.7	36349.9	17542	13646.4	15257.6	21254.5
MSTRG.29945.1	chr9	68413559	68419076	+	2213	20.5028	19.4045	24.4832	40.6448	34.5786	16.3876	16.9665	12.9793	64.6844	36.6573	43.2505	46.4054	31.0108	47.2101	22.8685	42.7516	99.7962	51.704
MSTRG.6194.3	chr12	2364887	2365481	-	565	777.922	373.445	138.558	90.2386	203.401	351.366	215	22.6758	829.168	49.8492	244.928	121.941	171.799	241.295	199.701	425.527	108.407	143.684
MSTRG.18737.15	chr21	9826874	9840899	-	695	2.40195e+06	1.33703e+06	1.25015e+06	1.24777e+06	1.49377e+06	1.25607e+06	685803	716379	2.15547e+06	720538	1.50286e+06	1.25945e+06	946028	707309	745181	603713	626395	1.62234e+06
MSTRG.7202.1	chr12	66281388	66315533	-	809	87.7664	195.68	625.17	306.579	144.444	100.946	107.218	2.0434	802.676	32.8529	410.608	267.7	178.574	868.957	90.4502	394.43	24.011	2.6338
MSTRG.28862.1	chr8	86851934	86920842	+	442	112.84	20.4811	302.111	219.115	430.007	37.0742	10.9024	1.4025	36.8024	1.795	44.9182	71.1731	9.7914	113.605	5.631	1451.92	7.5226	11.0876
MSTRG.9665.9	chr14	106090692	106134668	+	207	302138	1332.16	1192.28	275.343	2000.51	78323.5	2850.77	4753.77	1414.49	6825.13	23389.7	2692.82	4071.95	11105	1195.16	2233.64	10532.1	1689.15
MSTRG.18763.2	chr21	16795389	16819403	+	3097	13.0848	4.7218	5.3035	10.9991	106.684	5.8984	4.9921	16.4807	25.2115	3.5224	5.4539	10.5775	9.6489	60.9315	3.2146	8.1025	4.803	2.9584
MSTRG.5322.28	chr11	65266516	65283925	+	1929	24782.7	22531.2	25206.2	27414	31595.4	24141.7	16846.1	14165.4	47460.7	21617.2	21837.8	52245.1	24030.7	25644.9	18530.8	28187.2	15112.2	13538.8
MSTRG.6935.1	chr12	52806883	52863074	+	401	8508.61	23372.9	47977.6	16743.6	68772.1	41802	9787.92	385.457	88955.5	38414.8	93050.2	35396.6	53501.3	24281.3	14637.2	13621.6	35970.4	3603.14
MSTRG.26165.1	chr6	138906896	138921366	-	545	86.4302	218.916	338.951	240.207	237.224	268.143	185.681	45.8784	451.885	194.704	178.883	342.039	322.175	217.952	282.23	181.684	191.054	136.446
MSTRG.26441.1	chr6	163838426	163890982	+	538	771.254	610.931	821.925	831.8	904.758	637.136	727.008	300.361	1214.86	608.671	511.135	716.174	682.614	888.673	617.758	690.493	602.088	704.175
MSTRG.30675.8	chrM	642	3234	-	856	5.12717e+06	5.42386e+06	4.93563e+06	4.41304e+06	4.32759e+06	5.41209e+06	6.95081e+06	7.1858e+06	2.93621e+06	5.38444e+06	5.78067e+06	4.37101e+06	4.67081e+06	4.45011e+06	5.50376e+06	5.34967e+06	5.48716e+06	6.45353e+06
MSTRG.17494.1	chr2	191685763	191749887	-	2640	67.9593	30.7734	64.7208	55.0699	73.7724	36.2251	25.0982	17.2985	39.3111	32.8319	31.5408	48.5507	39.578	67.491	32.18	36.8002	29.8957	23.7287
MSTRG.18569.1	chr20	46420946	46428516	+	1567	3.5365	0.2963	4.0838	2.1312	46.8945	0.6857	1.5376	0.2637	23.2529	3.1644	3.593	20.2415	5.1291	78.2154	0.5294	12.1185	11.5028	0.4079
MSTRG.25998.1	chr6	117946844	118016888	-	736	176.472	179.136	234.179	234.741	219.202	241.626	133.402	116.517	234.717	211.01	182.386	232.081	160.725	206.141	181.258	181.53	136.956	90.325
MSTRG.2972.1	chr1	233819341	233824918	+	254	35.4538	100.524	274.618	50.8393	61.9941	84.6097	35.5722	2.4407	64.042	25.769	76.9982	90.0745	69.7773	64.8338	79.0444	20.6932	2.7559	1.6778
MSTRG.20465.3	chr3	96319863	96337052	-	472	9992.96	12480.3	10288.7	9367.43	8391.22	9672.59	11206.1	16342.7	3620.71	10373.1	9703.43	9186.6	7371.96	10698.5	7662.92	9546.56	9418.07	12599.4
MSTRG.2542.1	chr1	195690804	195708364	+	1480	0	24.153	1.4413	31.4405	9.3329	24.867	63.356	3.9094	1.7586	20.5044	0.2002	1.9323	4.7344	0.3648	75.3402	1.4893	46.4694	57.1558
MSTRG.19249.8	chr22	23248513	23267773	-	260	61706	2590.81	1518.62	415.311	964.765	4656.7	1946.85	4298.16	549.312	2286.29	6439.4	413.98	1196.89	2365.3	1183.83	2175.46	3236.14	987.518
MSTRG.27824.1	chr7	129583275	129628629	-	273	370.462	529.708	395.369	499.107	441.197	640.593	317.727	185.448	558.906	354.548	441.776	441.884	566.172	460.817	429.103	330.406	292.306	385.563
MSTRG.2807.1	chr1	218772000	218772592	+	288	6.0131	7.2537	99.2493	0.7731	43.1647	3.7311	0	0	5.6481	6.1982	96.7176	5.4164	20.0362	13.1232	6.3375	2.3549	0	0
MSTRG.28548.2	chr8	46841546	46845686	-	405	157.357	3.4388	2.1068	1.0995	0	0	2.9746	0.5102	0	0	0	3.2097	2.0354	1.9997	3.6873	2.5119	0	13.6788
MSTRG.19832.5	chr3	23933588	23962011	-	1282	836.442	1245.15	1548.59	1401.67	1598.27	1051.7	1440.43	1773.55	826.783	1573.75	1329.54	824.781	1601.75	1306.44	1057.82	1133.42	1869.3	1168.59
MSTRG.16896.1	chr2	133007390	133034556	-	350	2460.12	957.658	602.149	799.599	1146.06	1088.36	345.351	494.17	1292.97	426.155	1198.85	951.555	492.841	833.803	193.424	345.399	206.999	332.396
MSTRG.14880.1	chr19	23543411	23544629	+	295	331.093	346.999	122.925	343.395	195.719	251.334	267.487	1262.27	245.93	379.206	261.169	555.228	209.579	156.488	361.104	435.084	529.15	397.98
MSTRG.19567.2	chr22	45529703	45559715	-	1237	115.639	116.904	264.527	253.238	293.45	143.113	93.9813	50.1153	265.895	143.186	223.023	333.759	147.776	211.912	212.205	203.68	120.674	96.9773
MSTRG.14879.1	chr19	23542512	23927019	+	221	1995.07	2299.14	807.883	3003.13	1338.77	2752	2245.89	5983.28	1551.59	3918.41	3558.6	5783.25	1733.55	1456.09	3748.77	3191.54	4039.23	2950.26
MSTRG.27145.1	chr7	66148025	66189139	-	513	272.764	542.064	257.388	520.364	421.651	585.448	318.204	115.204	478.17	396.687	488.101	774.895	340.264	278.91	551.476	378.762	435.963	347.232
MSTRG.20825.1	chr3	129474054	129476037	+	1117	12.7132	15.3776	19.4788	14.7497	21.2693	12.9869	12.9423	6.6599	52.7174	18.8222	16.4478	29.7927	18.2655	27.3106	16.7859	22.3133	13.3169	14.879
MSTRG.6934.19	chr12	52866975	52913767	+	249	66496.2	152005	236860	191628	247216	193189	73130.3	11307.2	321889	226874	250057	235166	253609	102755	121206	115378	242796	17387.4
MSTRG.6953.4	chr12	53200384	53202469	+	861	11.6659	5930.5	300.024	29663.2	7.0588	397.806	27517.2	8482.65	32.8734	26814.8	17.8966	1496.21	3199.73	27.9057	37560.6	1252.23	18198.7	24516.4
MSTRG.24996.1	chr6	15383227	15406728	+	978	122.535	154.034	148.969	131.354	127.958	206.558	68.3656	31.9049	333.982	120.669	99.3814	147.007	155.092	190.741	164.401	115.808	95.0149	76.9072
MSTRG.19387.1	chr22	35738522	35740133	-	1441	42.7838	44.9419	29.7541	47.4329	11.6943	50.7071	36.2278	20.5065	64.5699	27.8039	39.2771	48.1726	30.0334	29.7878	33.508	21.0615	17.4878	52.3444
MSTRG.23555.4	chr5	60615945	60651292	-	1473	292.275	428.783	258.639	355.198	230.118	386.996	260.081	151.93	252.227	308.086	173.209	214.097	581.743	306.985	359.679	223.535	361.047	716.034
MSTRG.3349.1	chr10	28811581	28818436	-	480	105.35	128.149	110.211	184.607	226.759	120.886	118.38	114.945	162.667	147.518	106.801	168.992	173.886	170.415	152.101	128.929	207.447	124.737
MSTRG.24573.1	chr5	151017320	151035110	+	1834	2.2662	4.3032	6.2807	6.5554	12.3516	9.6674	4.2697	2.8168	10.466	8.5437	8.2403	40.5433	13.2597	7.6544	10.6758	8.2279	18.9885	14.0578
MSTRG.8518.5	chr13	110069372	110101543	-	202	476358	456352	472657	435232	559690	432889	806225	888597	242346	371776	418885	403538	478272	448526	392726	667104	446449	515096
MSTRG.14552.4	chr19	9671029	9714890	-	507	454.977	835.996	1172.58	1260.31	794.98	804.848	623.742	453.635	816.22	1190.84	818.842	1048.67	847.922	939.282	1212.22	926.676	690.677	453.886
MSTRG.16050.1	chr2	48122325	48127957	-	2239	37.1262	38.8766	36.1077	48.7245	29.1184	46.4324	27.3513	12.7363	42.5737	29.3219	24.749	29.2617	36.1733	31.4697	42.9086	24.4595	25.0892	45.584
MSTRG.1464.1	chr1	112179765	112218692	+	796	429.899	342.347	377.048	575.063	354.688	322.295	328.421	148.232	408.301	399.428	233.785	215.241	410.361	504.995	351.45	298.205	387.373	357.89
MSTRG.28364.22	chr8	26167729	26237654	+	244	2988.03	4854.53	3868.46	7223.97	3187.11	6437.35	4136.68	2627.91	3992	9457.08	6830.08	3585.49	7165.73	3696.51	4700.38	3084.57	4654.69	3883.37
MSTRG.5322.33	chr11	65266516	65279625	+	1854	25784.1	23441.5	26225.1	28519.3	32873.1	25116.4	17527.2	14738.1	49379	22491.2	22720.9	54357.2	25002.3	26680.6	19276.7	29326.6	15723.1	14085.4
MSTRG.22293.26	chr4	83757863	83762565	-	2357	23.2178	27.5746	28.146	40.712	23.91	30.317	21.4671	23.6714	51.7607	24.1513	22.0013	33.7532	22.9082	32.2994	35.4102	36.6149	31.1836	28.7474
MSTRG.8516.11	chr13	110076469	110086880	+	271	355018	340065	352246	324173	415819	322628	600844	662275	180601	277072	312150	300734	356456	333969	292681	497058	332735	383879
MSTRG.20467.2	chr3	96323287	96343464	+	229	20608.9	25777.4	21605.1	19333.8	17340.1	19945.9	23121.9	33808.1	7476.98	21407.2	20023.4	18988.2	15213.5	22212.5	15435.6	19707.9	19424.9	25975.5
MSTRG.13017.1	chr17	39747122	39766468	+	414	1478.29	2631.81	9735.58	3068.04	14887.7	5667.95	1647.51	151.737	17305.5	6633.01	18184	7787.07	10721	3877.31	2048.45	3170.68	5283.37	44.2618
MSTRG.5117.1	chr11	58977179	58977539	+	250	189.803	300.827	172.356	429.252	208.848	161.181	125.29	75.2178	80.6826	196.757	67.5624	99.8353	409.7	305.599	420.793	211.599	216.299	490.923
MSTRG.29923.2	chr9	68259896	68328634	-	455	113.422	209.673	192.215	535.317	262.897	129.89	336.702	160.772	438.306	629.468	234.456	330.841	236.886	472.288	466.057	393.507	784.996	433.642
MSTRG.22434.1	chr4	101324360	101394898	+	3155	129.211	139.787	12.7784	53.9843	54.9006	123.206	47.0939	18.2736	35.1628	57.5856	63.3979	25.5455	68.8479	69.2237	182.231	69.6474	96.9013	206.996
MSTRG.5322.20	chr11	65266516	65317812	+	1584	30288.2	27563.9	30749	33430.7	38541.8	29455.5	20556.7	17301.3	57878.3	26362.9	26652.7	63715.5	29308.4	31335.2	22607	34424.4	18439.5	16514.2
MSTRG.1599.3	chr1	121484058	121485440	-	1044	18.5785	30.0154	26.7662	17.2739	329.441	45.5446	51.735	29.492	26.1762	50.9158	307.112	111.815	61.1943	39.0465	48.4751	115.957	45.2584	36.737
MSTRG.12824.7	chr17	33478110	33478374	+	212	12893.6	17231.6	6390.3	9192.34	8200.32	9247.66	6869.33	19566.7	5823.77	8589.58	17357.5	12234.1	8735.34	10794.7	4750.86	3394.21	2938.67	3011.18
MSTRG.10694.4	chr15	77735211	77911009	-	370	1111.15	1386.44	1364.04	1520.58	1249.12	1497.1	1372.4	1089.06	1279.35	1254.39	1058.77	1059.63	956.91	1349.09	1291.55	965.064	897.226	1786.95
MSTRG.19229.2	chr22	23040596	23177297	-	278	37563.4	1383.53	1022.06	136.147	134.152	1362.51	707.805	1578.81	138.091	475.882	1725.73	143.087	476.668	912.827	793.828	1439.35	984.528	218.44
MSTRG.8945.11	chr14	49963514	50071028	-	309	529844	269818	312713	199979	300982	170896	186100	360482	194307	196732	326400	311212	200967	373509	158673	308651	263505	86427.5
MSTRG.28750.21	chr8	70595885	70602618	-	254	195643	96769.1	53753.8	79918.5	97314.4	106874	43689	73467	116044	45366.8	83723.9	104734	66672.2	66706.6	30620.2	25696.3	30374.1	40912.8
MSTRG.16545.1	chr2	92297138	92322274	+	301	90.9041	232.891	37.5599	398.683	172.544	166.001	853.172	895.908	326.414	45.4675	70.882	672.858	146.52	200.006	309.254	268.69	113.372	218.738
MSTRG.3.7	chr1	556292	569697	-	377	28771.4	45429.5	33192.4	32643.8	30810	33551.7	41017.8	79514	24888.4	29439	34072	26827	29122.1	18752.8	49714.1	34515.9	37611.4	53598.1
MSTRG.1968.32	chr1	153065904	153122643	+	453	302.775	5062.56	8114.8	1069.46	1166.61	11631.4	1328.38	153.271	5873.23	14579.3	15236.3	8044.12	9864.85	1492.25	2923.7	303.17	7544.67	283.159
MSTRG.23804.14	chr5	79922610	79973796	+	1439	8511.12	9199.44	8065.98	7347	10290.7	6291.94	12053	13997.1	4220.51	5953.34	7979.6	7829.62	5695.38	9020.81	5110.21	8264.62	6556.08	10204.5
MSTRG.14890.1	chr19	23807308	23963134	-	1121	109.994	169.172	38.0574	342.998	65.7983	902.961	321.508	123.322	54.851	643.157	511.764	680.699	167.112	112.706	630.852	224.908	370.605	203
MSTRG.16913.1	chr2	133842530	133890488	+	1698	86.487	91.3167	139.319	168.62	143.333	167.541	53.33	26.8951	120.323	161.081	104.709	276.218	157.538	130.53	160.26	117.028	126.56	154.096
MSTRG.6194.2	chr12	2364872	2365481	-	580	758.4	364.187	134.975	87.9048	198.141	343.668	209.44	22.0893	807.724	48.9019	238.594	118.787	167.712	235.055	194.822	414.522	105.603	139.968
MSTRG.17178.1	chr2	161972901	162029404	+	560	497.887	392.53	537.089	628.961	463.219	393.839	257.794	181.55	335.79	468.587	310.084	543.188	521.472	534.143	385.782	361.506	325.623	334.451
MSTRG.6864.1	chr12	50968495	50987664	+	1162	88.5265	180.582	111.796	304.455	129.093	251.759	77.0657	29.876	359.77	177.861	150.713	127.756	183.385	177.498	215.335	167.07	121.084	159.347
MSTRG.18240.1	chr20	19732380	19737390	-	711	10.7171	241.26	93.3052	170.973	140.653	103.147	169.722	176.707	128.12	64.7197	9.169	106.774	56.8115	57.3341	240.374	4.2924	73.8393	169.021
MSTRG.6937.3	chr12	52909025	52909451	+	393	110.164	143.524	233.395	322.914	215.802	134.66	64.374	19.9807	327.817	223.073	192.273	274.542	440.49	175.854	274.858	235.559	243.574	224.46
MSTRG.8945.34	chr14	50038715	50119019	-	376	319215	148520	176836	130120	209648	119319	119555	264104	107937	130244	213208	183488	138183	271849	93264.3	195187	152093	68738
MSTRG.4725.5	chr11	10483360	10531744	-	529	20716.5	22050.9	20788.4	19163.1	25581.5	16766.6	29061.5	34390.9	10741.5	15775.2	21655.3	19973.8	13466.5	23224	12830.7	19946.1	18107.6	26961
MSTRG.5643.3	chr11	85195010	85205086	+	438	1653.49	1227.37	652.598	991.21	1294.86	1215.61	670.66	978.956	1119.35	835.488	1208.98	1038.17	636.61	995.414	397.772	579.491	613.296	539.497
MSTRG.2191.1	chr1	161483735	161565928	-	536	2359.87	1182.25	2251.32	1016.84	1146.25	581.376	733.467	272.567	712.577	856.282	553.4	513.67	1913.22	3118.69	612.323	1321.93	664.736	662.677
MSTRG.31056.1	chrX	64896934	64898237	-	729	35.1582	28.3383	21.0678	33.2893	17.4317	23.2154	14.3222	2.5511	30.3466	22.5823	11.3815	18.1884	35.0545	24.4412	35.9624	16.9783	6.2414	21.3367
MSTRG.17417.1	chr2	187490433	187579815	+	2949	709.86	362.15	471.688	450.416	748.013	266.814	198.539	219.746	692.477	277.035	398.317	676.285	359.62	741.416	285.38	716.839	259.799	147.83
MSTRG.5318.1	chr11	65205055	65205394	-	298	1328.47	1988.59	646.378	1067.63	755.528	3385.89	1223.58	416.058	1512.03	1910.22	827.327	2398.34	1643.16	770.937	2883.69	1130.53	729.946	1006.03
MSTRG.23804.7	chr5	79902606	79951648	+	259	47144.6	50935.4	44767.5	40682.3	56850.8	34813.7	70483.5	77619.3	23228	32790.2	44133.2	43178	32547.3	49948.5	28201.3	45651.7	36043.1	56740.3
MSTRG.7856.1	chr12	127668710	127682081	-	434	3.9903	0.5348	3.4405	3.078	1.9096	6.8087	3.2385	0	3.7481	0.457	6.145	10.7829	20.8936	1.2441	1.147	24.6122	8.0645	0.491
MSTRG.18737.5	chr21	9761632	9849851	-	556	3.00973e+06	1.67917e+06	1.56704e+06	1.56658e+06	1.87834e+06	1.60851e+06	862423	898591	2.70109e+06	904270	1.88475e+06	1.58186e+06	1.18828e+06	888374	935497	758538	785590	2.03098e+06
MSTRG.9499.1	chr14	93781266	93885537	-	1053	97.3613	104.046	134.713	149.062	118.582	126.027	105.636	61.4236	232.028	132.982	101.308	143.944	104.315	141.007	98.3276	103.534	118.328	96.5209
MSTRG.3531.19	chr10	47177204	47181681	-	282	12.2821	94.6586	49.9241	134.216	210.619	78.1139	262.73	21.2504	356.482	153.329	503.334	183.466	179.778	76.5855	132.389	28.8597	132.18	18.134
MSTRG.19765.26	chr3	15704547	15780209	-	232	83694.3	58022.8	52574	56608.4	55751	40628.8	59801.2	95760.9	29104.7	42431.8	60992.1	59399.3	38335.6	62838.7	45174.6	59177.5	50974.5	38706.1
MSTRG.23833.1	chr5	82735565	82831396	-	6609	201.976	132.9	63.3255	34.934	85.355	97.0243	49.9458	9.2237	270.545	25.0593	102.138	22.6589	127.662	208.896	62.3642	131.377	62.6756	56.549
MSTRG.5312.30	chr11	65192483	65264733	+	14593	1014.57	1637.91	543.139	976.307	639.059	2660.11	1052.14	387.258	1253.18	1751.4	638.463	2191.48	1352.7	702.539	2182.56	958.653	677.704	705.045
MSTRG.19765.3	chr3	15658367	15854797	-	300	94153.5	55715.6	47961.1	52851.3	54527.1	41648.4	54877.4	83078.5	28722.6	43463.7	56849.2	55224.8	36042.5	61189.1	44726.4	53360.4	49866	35929.3
MSTRG.6194.1	chr12	2364813	2365481	-	579	762.701	366.019	135.577	89.2102	201.346	345.654	210.149	22.1275	811.366	50.0141	241.565	119.442	170.137	236.393	197.738	417.581	106.39	140.946
MSTRG.26017.1	chr6	121769464	121769812	-	295	1111.86	992.212	3567.73	1332.83	6974.72	1859.51	1099.9	217.149	5882.46	1623.06	2447.96	3854.87	4480.11	2591.65	1510.23	2938.69	1803.38	1253.89
MSTRG.19431.1	chr22	38131680	38203499	+	376	572.962	708.087	1071.1	1104.32	936.032	781.616	732.654	1006.83	1176.74	1281.85	1975.77	1023.36	955.342	1124.37	867.591	1021.36	1076.52	770.128
MSTRG.1963.2	chr1	152933252	152997513	-	849	388.784	21337.2	10403.3	27871.3	892.213	17121.2	47418.7	16582.5	7398.36	81134.9	8937.96	12634.1	24339.8	2485	37354.5	3770.25	53354.1	16019.7
MSTRG.2304.5	chr1	170600629	170644292	+	6622	49.741	50.8265	16.976	33.6887	36.7532	31.1961	40.4482	7.8326	59.0532	28.0952	36.8282	11.2287	51.4438	59.3986	37.761	68.2606	66.5695	72.6873
MSTRG.3758.1	chr10	70536397	70583352	-	636	143.226	143.067	173.735	222.291	245.849	120.802	94.0788	83.1768	285.434	132.541	170.061	260.396	157.481	188.89	127.838	154.088	142.806	122.953
MSTRG.29213.3	chr8	120200115	120232972	-	614	76.7173	300.167	547.176	1073.68	282.103	420.017	253.435	171.641	974.41	631.857	285.709	319.268	915.977	148.172	795.319	246.87	272.759	471.262
MSTRG.5643.2	chr11	85195010	85215108	+	294	2498.71	1839.59	983.121	1519.87	1937.54	1826.54	1016.9	1464.77	1672.04	1251.45	1821.3	1548.43	956.129	1486.64	612.917	874.281	935.71	832.73
MSTRG.7238.2	chr12	67330283	67413952	+	4370	114.131	120.415	193.445	513.195	289.15	106.963	124.79	39.4843	440.205	229.116	137.992	221.436	259.094	309.563	222.958	221.696	427.567	124.968
MSTRG.14969.1	chr19	36237613	36237925	-	272	243.213	258.574	320.752	271.753	364.615	180.737	208.167	180.052	190.176	308.453	199.367	301.089	288.673	380.133	211.68	285.493	308.822	107.321
MSTRG.21190.1	chr3	160204890	160232943	+	251	3466.32	4673.83	3355.2	5705.29	4909.84	3216.14	4332.49	5173.47	3869	5668.99	2849.93	4841.36	4313.04	5170.18	4987.09	6082.21	4214.62	2972.01
MSTRG.28681.2	chr8	62115810	62139397	+	234	63.6466	76.3811	192.345	120.835	126.321	45.9206	48.0512	79.4778	104.273	128.839	89.911	192.213	129.465	109.601	56.0184	80.4279	104.7	51.9027
MSTRG.19765.25	chr3	15697313	15780209	-	271	71700.8	49767.8	45017.5	48561.2	47825.6	34832.4	51247.7	82017.2	25009.8	36415.4	52266.1	50957.6	32871.9	53853.3	38741.4	50775.7	43722.7	33216.8
MSTRG.6497.3	chr12	20660215	20704506	-	452	40539.8	29515.6	18656.3	23073.4	28596.6	21244.2	11168	8902.53	20609.7	11240.2	19995.5	32923.5	13332.7	20574.6	9272.14	7112.5	7130.44	19078.6
MSTRG.16207.1	chr2	64304286	64337915	+	351	1634.09	2290.11	1868.76	3899.07	930.292	4014.23	2765.24	715.3	1990	3567.92	1360.91	1593.26	3495.25	1396.74	5704.42	1081.07	993.158	1339.76
MSTRG.7076.1	chr12	58267676	58284293	+	246	4.2239	15.0972	2.6014	13.5757	4.4919	13.1042	26.1184	13.4401	2.645	3.2251	2.4092	11.6255	13.404	12.0716	7.4195	4.1354	2.8455	11.26
MSTRG.22293.27	chr4	83758405	83762776	-	1823	24.889	29.5401	29.1359	45.7983	25.913	32.7137	23.1294	26.5246	57.8211	26.4386	23.0819	36.0817	25.2097	34.6525	36.4077	39.0627	31.8704	28.8697
MSTRG.23804.19	chr5	79922611	79951648	+	268	45498	49159.9	42980.8	39159.9	54841.6	33596.5	64527.8	74964.1	22378.8	31597.3	42516.2	41641.7	30284.7	48023.3	27207.2	43999.6	34762.8	54555
MSTRG.9228.13	chr14	69255322	69308653	-	1079	462.878	591.807	469.128	921.309	450.097	1283.43	462.979	200.897	891.576	695.949	395.743	807.432	1135.1	610.484	1148.73	484.296	695.131	856.247
MSTRG.19765.4	chr3	15658380	15854792	-	268	105394	62367.3	53686.9	59161.9	61035.7	46619.3	61429.9	92993.6	32149.7	48651.9	63636.1	61813	40344.5	68492.2	50066.9	59730.5	55819.5	40219.4
MSTRG.2637.1	chr1	202305339	202441067	+	227	1010.08	1365.11	1082.53	1137.72	1158.56	1196.43	1053.46	918.511	1855.98	981.233	875.925	1226.64	1246.51	1460.42	772.625	1066.6	1332.92	1527.19
MSTRG.1904.2	chr1	152466531	152552980	-	620	165.357	1428.28	1134.68	611.544	1423.15	1069.34	1042.79	367.29	3622.22	3063.45	4649.46	3212.52	2274.93	786.814	397.959	192.522	1070.32	32.9922
MSTRG.7759.2	chr12	120668777	120731030	+	426	603.278	617.895	378.053	580.121	669.884	396.017	452.946	491.382	359.699	372.01	411.101	521.196	369.601	980.362	272.651	509.846	406.688	210.073
MSTRG.17055.1	chr2	149639292	149684810	+	359	239.266	309.708	194.892	208.997	233.931	178.841	400.453	2886.08	67.9665	147.515	149.401	201.327	181.402	275.228	881.867	1418.27	214.484	1583.52
MSTRG.12998.7	chr17	39639020	39658661	+	508	152.724	10157	1342.02	23101.6	66.8883	9742.28	19596.4	4975.28	1061.82	40382.8	741.982	3572.78	13089.3	62.7081	24413.6	1397.79	33920.2	10263.2
MSTRG.6652.17	chr12	32721666	32727784	+	2713	14.2985	13.6893	10.0641	18.1363	9.1643	10.0008	17.9841	9.9779	18.1074	16.0108	10.9225	9.1039	14.8127	12.5379	19.2043	15.9989	14.1264	10.9954
MSTRG.30413.1	chr9	127420691	127461031	+	765	147.597	293.411	450.883	439.752	343.783	311.477	222.833	55.1046	573.692	431.43	333.9	489.049	248.381	627.798	417.965	404.483	375.162	237.585
MSTRG.4723.7	chr11	10432772	10531364	+	340	31699.7	33899	34571.6	29303.5	39149.3	25646	50325.7	52724.8	16529.8	24220.1	33124.9	30782.5	20706.8	35614.6	19726.4	30582.9	27755.4	42358.6
MSTRG.6.4	chr1	566160	616413	-	466	18340.5	28703.1	23776	22281.8	18581.9	22879	27957	37076.3	15838	20795.4	22618.1	16642.6	20332.2	12391.7	32513.3	21205.8	27140.6	38856.4
MSTRG.6497.5	chr12	20681516	20704506	-	253	72210.5	52537.9	33244.6	41127	51010.9	37800.1	19892.9	15864.1	36645.6	20028.8	35525.2	58718.2	23741.5	36625.4	16475.4	12603.7	12691.2	33998.4
MSTRG.19791.2	chr3	23277999	23288656	-	7003	23.5421	31.1901	15.4128	37.1651	34.7931	32.2992	39.9105	10.3867	32.3335	36.5079	31.778	22.4979	33.666	29.7218	29.8305	28.4239	23.4648	27.9921
MSTRG.23468.1	chr5	53362344	53420997	+	1370	427.762	327.339	332.736	567.978	817.471	226.085	355.845	416	651.141	447.793	371.598	482.59	704.455	847.529	388.659	574.492	714.686	657.109
MSTRG.29605.10	chr9	9413162	9453152	-	273	99250.7	42455.7	42960.9	31714.5	70911.3	26851.8	31917.6	64866	29302.6	29617.1	48789.6	58580.1	28390.9	61977	23470	36367.1	27403.1	17305.1
MSTRG.23803.7	chr5	79921989	79947496	-	900	13435.9	14492.5	12680	11553.8	16151.4	9917.43	19009.5	22116.2	6593.42	9334.71	12548.1	12293.1	8930.18	14162.9	8022.06	12968.4	10256.3	16128.5
MSTRG.9671.1	chr14	106091783	106237790	+	668	241152	4786.24	2901.43	320.63	2295.23	26455	5250.48	6254.95	1561.4	8828.66	32452.2	3865.18	4223.54	11702.2	3285.77	12387.1	8505.54	1868.23
MSTRG.31220.1	chrX	100686318	100712741	+	392	102.493	111.323	64.2112	112.456	132.489	90.459	79.3923	113.864	154.367	89.5582	99.0274	151.881	83.0655	148.756	116.827	148.789	170.981	229.381
MSTRG.11859.2	chr16	69151913	69201167	-	618	555.403	608.468	1012.71	796.536	874.805	606.386	494.816	355.104	663.827	787.276	1040.02	740.839	728.972	820.375	816.483	840.346	613.063	342.022
MSTRG.26732.11	chr7	7310930	7465677	+	1414	17.1463	85.198	2.4137	146.59	14.0667	50.1555	405.547	67.0784	21.3974	460.791	16.1366	25.3736	123.594	12.4099	148.678	18.4659	327.845	1690.73
MSTRG.8515.1	chr13	109887976	109925586	-	6068	88.4156	123.557	166.03	119.98	231.365	246.013	117.103	6.7768	149.316	95.2494	196.363	346.622	168.048	116.964	246.431	101.904	4.8739	1.2992
MSTRG.6937.4	chr12	52909030	52909451	+	368	117.648	153.274	248.671	341.221	228.21	143.808	68.7472	21.3381	347.435	237.15	205.335	293.193	470.415	187.801	292.177	250.64	257.743	237.972
MSTRG.20596.1	chr3	112960839	113002265	-	2474	19.8798	36.7788	12.071	75.3236	28.9207	31.4892	90.4103	36.083	43.1323	149.92	30.9023	29.4246	102.21	25.5342	61.502	57.225	265.257	184.911
MSTRG.28699.1	chr8	67580016	67585651	+	931	45.7592	25.9295	63.6957	54.7635	85.7545	18.4669	28.468	38.6206	98.5434	60.5044	46.1518	88.5243	35.8604	95.1108	40.9919	134.766	106.391	59.2763
MSTRG.19249.4	chr22	23242346	23309662	-	1287	33029.5	1718.08	938.937	234.577	628.924	2313.57	1418.29	3108.95	335.95	1712.5	5014.29	478.765	889.038	2089.86	453.433	919.815	2486.16	640.051
MSTRG.3.4	chr1	537574	569606	-	219	49549.5	78216.8	57147.1	56217.4	53068.6	57742	70664.6	137143	42899.4	50660.9	58694.3	46190	50156.2	32285.9	81941.9	56792.5	64771.3	92245.6
MSTRG.9003.16	chr14	52092923	52111119	+	3155	27.9939	67.3919	107.501	109.803	101.395	93.4052	73.0592	7.4666	155.603	72.485	93.5471	176.429	66.7576	68.1969	217.941	76.5799	47.4245	60.1741
MSTRG.19939.15	chr3	37153281	37217818	-	17243	17.817	42.4984	28.1315	65.3604	26.0505	24.3195	40.4878	13.3623	24.4712	34.1174	22.1519	15.485	29.6168	24.5023	34.2287	17.9846	27.5748	19.1783
MSTRG.28750.35	chr8	70601838	70602620	-	395	123053	58897.2	34362.7	49048.7	62451.6	67018.8	26648.6	47231.6	73887.7	29100.3	49430.2	63579.2	40975.7	42234	19183.8	16472.6	19459	26129.9
MSTRG.7861.1	chr12	127627874	127650987	+	461	5655.15	2032.18	1423.78	1643.97	2256.18	2058.76	1685.12	1356.4	2446.7	1413.36	3269.87	1923.68	1040.71	1834.11	593.165	800.676	778.576	556.027
MSTRG.6497.7	chr12	20699678	20707727	-	603	30256.5	21976.7	13943.1	17246.4	21399.4	15801	8322.78	6648.53	15371	8387.99	14708.2	25089.9	9949.91	15363.3	6872.39	5275.19	5308.02	14228.3
MSTRG.4725.1	chr11	10433948	10531349	-	906	11895.4	12720.7	12973.4	10996.2	14691.2	9624.34	18885.1	19785.4	6202.87	9088.34	12430.7	11551.7	7770.55	13365.3	7402.84	11476.7	10415.2	15895.9
MSTRG.25954.32	chr6	112073395	112081311	-	2750	42.3184	17.7255	15.8239	28.9838	9.9452	19.6348	9.5647	4.4334	11.0022	14.0644	12.7151	7.3742	36.9457	27.1927	8.6283	10.9745	9.4818	20.3002
MSTRG.6953.3	chr12	53188653	53227443	+	413	65.4135	24029.7	1196.72	120842	107.692	1596.85	106392	34430.2	178.815	108581	76.7722	6151.57	12811.8	107.855	143868	4792.99	69772.1	85771
MSTRG.4725.12	chr11	10511330	10531348	-	942	11264.7	12085.7	11345.6	10480.4	14015.9	9089.13	15942.2	18980.2	5717.85	8639.31	11674.4	10861.2	7311.04	12396.6	7023.58	10904.5	9941.7	14888.5
MSTRG.9671.11	chr14	106110132	106238197	+	848	138122	3533.52	1847.11	211.351	1329.15	12783	3264.66	3959.34	994.414	5239.97	19678.1	2364.11	2467.93	7136.21	2143.37	8029.26	5012.24	1208.59
MSTRG.10757.1	chr15	81953524	82000057	+	664	54.7702	37.4048	65.2143	47.613	18.306	71.2047	27.5173	42.3243	192.064	18.52	23.6526	182.07	25.1401	38.6243	53.4768	241.303	34.5254	50.0596
MSTRG.23981.1	chr5	95196352	95296554	-	6148	682.459	654.563	605.83	840.734	639.591	985.842	592.167	179.686	938.164	795.955	497.99	783.304	892.058	545.329	660.122	392.327	826.606	630.316
MSTRG.19038.1	chr21	45205063	45277314	+	560	64.9418	196.472	233.881	228.207	107.049	311.809	159.194	44.6495	198.686	197.635	248.173	188.491	256.136	120.52	576.6	63.2787	127.187	79.1419
MSTRG.29604.10	chr9	9389364	9447649	+	231	152590	69228.8	73021	86555.3	107299	44184.2	52667.5	102434	48987.3	46949	80335.2	93665.3	66642.7	94620.6	35037.4	64435.8	47536.9	25469.3
MSTRG.11120.1	chr16	3119339	3132194	-	214	784.966	278.76	765.531	752.194	1147.62	651.505	297.425	108.149	434.791	342.004	220.168	191.953	673.152	736.724	193.841	541.928	229.789	250.91
MSTRG.18957.1	chr21	38738092	38844409	+	1983	608.699	610.089	649.402	730.909	527.711	520.473	454.729	257.183	913.656	468.103	476.543	644.135	640.707	558.17	561.628	468.209	534.352	618.593
MSTRG.8946.1	chr14	50012168	50066447	+	283	538539	283762	326166	184307	294126	176333	193244	371698	199072	194293	324257	328157	193909	374967	136706	293270	241065	93438.8
MSTRG.8945.8	chr14	49958453	50071028	-	391	418792	215129	256690	159268	240261	140012	148968	287702	153595	156065	257979	253701	162514	300905	128227	248579	210563	70249.7
MSTRG.1963.1	chr1	152922009	152997513	-	942	355.18	19244	9387.08	25139.8	808.234	15442.6	42747.9	14947.3	6692.47	73158.9	8089.52	11413.5	21963.5	2250.84	33694.8	3400.91	48089.8	14440.7
MSTRG.1968.27	chr1	153042992	153122608	+	472	534.21	8062.7	14841.4	2004.24	1759.95	20770.3	2406.45	292.014	8863.26	27273.9	22616.9	12435.9	16427.1	2738.53	4842.84	529.486	12025.6	304.714
MSTRG.19765.60	chr3	15779161	15780209	-	212	58684.5	47385.2	41680.3	44724.6	41087.6	33328.6	48764.4	72420.3	20824.4	36732.8	49370.5	44025	31527.3	50665.3	33855.6	48976.1	44506.7	38323.2
MSTRG.4723.36	chr11	10519153	10531971	+	1023	10550.8	11265.8	10563.2	9821.23	13118.7	8515.73	14977.7	17739.5	5306.78	8048.52	10940.9	10090	6813.14	11576.2	6542.07	10178.2	9275.98	13812.3
MSTRG.78.1	chr1	7889900	7890184	-	231	62.9738	96.4652	94.1897	229.388	100.456	54.6575	104.304	16.102	54.9264	132.229	74.4023	57.3999	145.42	65.4458	214.054	114.502	244.696	50.732
MSTRG.6934.16	chr12	52863227	53070228	+	397	50894.3	125838	189741	145879	201867	160861	57797.9	8407.79	278100	196042	216809	192541	232947	80597.5	96139.5	87722.6	196606	13510.6
MSTRG.9853.1	chr15	30037603	30044431	-	2652	12.0154	39.9994	28.2325	54.4849	17.0836	51.8633	32.48	14.2593	29.4419	52.3531	23.6882	30.9789	38.1555	23.1078	89.2832	18.6045	29.8264	21.5324
MSTRG.30675.21	chrM	15234	16571	-	609	16009.2	30472.8	15844.3	18834.2	14783.5	24444.5	18888.7	42667	13973.8	21899.5	16912	12917	17500.4	8684.06	23841.9	11804.8	18295.3	29339.2
MSTRG.17424.1	chr2	188022231	188043653	-	966	7.888	6.9684	5.0789	3.6876	5.1476	5.2837	2.7021	11.3375	3.0311	3.9012	7.0554	104.156	19.4139	9.5018	19.238	15.2701	18.8405	71.2454
MSTRG.23804.15	chr5	79922610	79959483	+	547	22309.9	24108.6	21097.6	19220	26928	16477.1	31633.8	36749.8	11006	15526.6	20878.8	20455.4	14862.3	23586.1	13357	21599.6	17087.5	26760.5
MSTRG.29164.1	chr8	115025787	115042249	+	536	68.4958	121.689	126.156	157.427	106.688	73.6744	63.682	80.5751	97.1144	91.4008	82.9271	136.785	105.735	114.835	104.324	80.3467	85.8671	69.1697
MSTRG.19229.1	chr22	23040596	23241837	-	524	60809.3	2023.51	1438.23	150.835	305.778	4110.54	1617.78	2156.73	161.425	1029.57	3075.8	231.21	486.112	2030.91	1735.91	3671.87	1815.12	413.95
MSTRG.9665.8	chr14	106032341	106235896	+	726	257807	6756.08	2655.82	559.976	2349.3	39193.4	5144.92	6882.95	1555.41	9586.88	32292.6	2640.34	4411.56	10227	3766.06	10648.3	8843.97	1868.66
MSTRG.18737.8	chr21	9770757	9829890	-	403	4.14473e+06	2.29614e+06	2.15818e+06	2.14547e+06	2.58018e+06	2.15993e+06	1.18246e+06	1.23691e+06	3.71736e+06	1.23711e+06	2.59445e+06	2.17378e+06	1.63306e+06	1.21932e+06	1.27805e+06	1.04226e+06	1.07873e+06	2.78631e+06
MSTRG.5741.2	chr11	95990899	95999222	+	1675	83.1255	90.6305	47.1196	86.1322	55.7456	53.4064	77.9168	44.7828	114.401	103.494	48.2968	81.4887	99.1676	116.689	67.8571	79.9672	74.5967	88.7916
MSTRG.7134.1	chr12	64229383	64305362	+	286	839.248	2541.95	779.409	1968.74	701.261	1469.98	735.746	619.927	1987.26	637.335	769.827	953.591	505.849	1168.58	996.728	1630.89	459.526	556.527
MSTRG.8945.48	chr14	50047473	50071028	-	288	368364	153968	195243	150174	231975	136801	143145	261086	121453	157812	258299	181375	147778	279458	105531	198427	167239	73441.1
MSTRG.22645.4	chr4	123915724	124020173	+	5438	39.1705	30.4769	52.21	38.9765	50.2419	29.2446	27.5812	21.2038	72.6286	28.7777	46.1545	60.957	50.0626	64.835	32.0383	63.6984	42.1247	40.789
MSTRG.30806.1	chrX	23095300	23133214	-	590	44.6154	40.1291	59.2935	59.6225	174.649	43.2549	37.4346	25.9178	74.992	31.6005	41.1843	58.1667	52.7442	124.458	45.5599	74.7172	21.0592	14.8069
MSTRG.18150.1	chr20	11137913	11141125	+	2236	0	0.7267	0.2862	1.0953	1.2355	0.4806	0.0898	0	0	0.887	0.1325	0.4651	0.1843	2.0525	1.6326	0.6066	12.9136	7.3375
MSTRG.8518.2	chr13	110037158	110103687	-	329	292536	290108	292093	267292	344692	266130	495371	545729	148836	241271	257243	248170	294028	301936	241176	409642	338780	316313
MSTRG.23491.1	chr5	55142478	55240856	+	372	3492.42	4574.37	4457.76	4393.57	4551.51	3419.33	5038.53	4397.26	2783.7	3811.71	3330.48	3300.86	4486.81	4913.05	4128.13	3915.16	4540.1	3589.62
MSTRG.3147.1	chr10	4801905	4808778	-	2987	0.8117	0.1554	1.2854	0.8199	35.1445	0	2.6216	1.5912	3.1586	0.7968	0.8928	1.9149	0.414	10.6648	0.2778	10.9552	3.1637	0.0713
MSTRG.25601.1	chr6	71110102	71150154	-	4362	18.4215	59.5996	90.127	88.352	67.6386	78.6446	88.3328	24.3025	75.3293	101.445	64.469	91.6692	71.5302	54.4631	59.4176	45.5944	71.6125	33.3142
MSTRG.26201.1	chr6	143182948	143183749	+	691	32.0793	15.4522	20.9916	19.3321	23.1878	16.3281	10.7512	7.4762	18.8326	10.0463	17.1535	16.5549	31.9121	24.6132	24.9732	23.3101	16.4616	9.2507
MSTRG.227.2	chr1	16823982	16840775	-	227	20001.7	36985.7	20427.2	41639.7	34475.8	12721.7	17798.3	36238.9	7545.72	19111.8	17489.8	35698.5	17442	40818.1	10207.1	24901.5	23301.9	21472.6
MSTRG.12510.1	chr17	18897472	19093549	-	449	2196.93	1797.5	2621.98	2089.06	2197.11	2192.76	2394.67	1918.69	1750.57	2431.81	3311.07	1990.15	2787.45	3377.85	2263.49	2264.58	2173.26	1905.81
MSTRG.9665.10	chr14	106090692	106134668	+	207	302138	1332.16	1192.28	275.343	2000.51	78323.5	2850.77	4753.77	1414.49	6825.13	23389.7	2692.82	4071.95	11105	1195.16	2233.64	10532.1	1689.15
MSTRG.18737.1	chr21	9757324	9887691	-	221	7.57311e+06	4.22495e+06	3.96396e+06	3.94179e+06	4.72953e+06	4.31806e+06	2.17024e+06	2.26137e+06	6.79921e+06	2.27532e+06	4.7421e+06	3.9928e+06	2.98986e+06	2.23564e+06	2.35645e+06	1.90869e+06	1.97758e+06	5.11124e+06
MSTRG.9752.1	chr14	106791070	107114007	+	202	20733.4	1022.7	590.304	289.874	470.453	4117.31	516.874	1002.52	225.478	837.56	1987.73	611.357	297.907	1181.43	301.463	1046.68	639.353	180.375
MSTRG.16547.1	chr2	92320485	92322910	+	728	0.9515	17.8553	2.0511	15.5971	8.3483	9.9631	49.369	35.1973	15.1941	3.5418	1.6282	34.9983	6.2279	11.1249	17.3221	18.1661	6.9711	13.1708
MSTRG.4723.13	chr11	10471796	10550583	+	477	23474.5	25345.3	26105.4	22252.9	29210.6	19383.4	37358.3	38892.1	12868.7	18866.3	24885.8	23259.9	15914	26568.5	15178.8	23034	21290.8	30377.2
MSTRG.29898.1	chr9	66801886	66803529	-	790	9.6454	7.0517	0.54	36.3553	3.8466	7.481	32.5323	29.5577	9.8835	54.4817	5.6264	3.9492	10.4348	7.8597	22.0537	22.7498	29.4619	16.992
MSTRG.23804.25	chr5	79934100	79968421	+	641	18930.7	20473.6	17732.2	16124.6	22778.3	13961.1	26919	31310.3	9288.49	13162.5	17653.8	17289.4	12546.2	19903.2	11309.2	17931.4	14465.4	22766.1
MSTRG.18731.1	chr21	15243721	15263795	-	518	50.8167	82.0035	0.8236	1404.62	1.5999	44.5998	575.223	726.04	1.8842	240.463	10.8691	25.5972	116.968	13.5503	77.8388	0.3273	51.0133	303.981
MSTRG.8989.23	chr14	50271115	50345259	+	397	339031	134209	157552	140139	167931	127765	146684	245235	100764	152595	220150	151389	123959	199209	97260.9	178434	139652	80023.1
MSTRG.4723.41	chr11	10530334	10552165	+	1923	4653.02	5032.03	4484.87	4442.17	6128.45	3539.34	6673.22	7907.42	2497.77	3339.87	4628.27	4553.5	3171.57	5034.55	2935.1	4631.39	4043.64	6096.83
MSTRG.14033.1	chr18	28707384	28755061	-	2643	19.2638	6.0599	102.177	12.7199	225.561	27.138	3.2667	1.4855	412.236	13.1328	751.187	1093.46	596.739	186.002	18.7085	9.3019	47.2094	12.9796
MSTRG.19765.27	chr3	15705462	15780227	-	239	97149.3	61086.2	57356.8	59556.9	62942	44181	65336	102072	33228.9	46749.3	68980.8	62591.8	41932.1	68623.9	48520.4	63775.2	56055.4	40406.6
MSTRG.7204.2	chr12	66394470	66451533	+	222	34114.5	159244	45449.9	48554.8	25379.3	45670.5	68482.4	18093.3	55478.1	38482.2	26776.2	10582.2	28013.8	34751.2	31132.4	22169.9	16435.7	36462.6
MSTRG.3938.1	chr10	81238136	81276188	+	3168	2.8426	7.5468	7.272	5.4114	8.8073	5.6814	3.1056	0.9784	9.037	10.8939	6.0799	10.8328	3.6429	3.4938	5.9185	4.4957	3.4801	1.816
MSTRG.9671.8	chr14	106092110	106136138	+	250	143838	906.194	691.984	197.705	1100.6	35292.3	2013.48	3787.34	1048.87	4908.61	16354.8	1878.15	3421.04	7929.38	901.32	1289.94	7152.57	712.521
MSTRG.11184.1	chr16	9149288	9201061	-	2830	91.6681	109.826	119.771	106.364	104.742	138.305	74.9221	49.2144	171.518	102.676	169.105	174.826	90.8819	91.9594	87.5372	60.3313	68.7629	67.0093
MSTRG.27559.1	chr7	104631824	104646351	-	9780	23.7987	14.3591	15.7694	22.3552	29.0095	17.1125	13.1599	12.0436	28.7743	16.914	28.8752	31.1028	13.4652	26.2235	12.0629	25.6926	29.2202	17.9741
MSTRG.10472.1	chr15	64859015	64860697	-	1271	12.2628	13.8797	17.6221	16.8163	18.0402	14.795	14.5337	5.0401	31.2279	12.1721	15.6207	16.3643	21.0789	22.0899	18.0158	16.9417	16.3847	31.014
MSTRG.19249.7	chr22	23248511	23265071	-	307	54741.2	2245.58	1323.65	360.432	852.159	4075.04	1710.93	3766.68	476.873	2046.75	5754.72	358.224	1063.33	2087.6	1011.78	1899.3	2849.58	850.909
MSTRG.14265.1	chr18	61089917	61091220	-	509	8.1656	19.6093	9.2198	33.6805	1.6282	24.2775	8.2839	4.4657	3.835	33.9015	1.7465	4.597	20.6491	5.8342	21.8412	3.9973	5.1571	3.7675
MSTRG.12510.15	chr17	18967227	19093549	-	382	2076.32	1603.57	2535.73	1867.39	2125.42	1911.39	2424.67	2015.57	1587.49	2329.24	3252.61	1869.6	2401.28	3248.75	1639.73	2056.8	2034.94	1536.7
MSTRG.5322.21	chr11	65266516	65273940	+	3782	12632.7	11476.9	12847.7	13943.6	16098	12304.8	8581.27	7219.53	24188	11009.2	11122.9	26619.1	12247.2	13068.1	9433.01	14366.4	7693.16	6891.17
MSTRG.27245.23	chr7	76133566	76305153	+	11799	140.139	205.561	123.984	269.381	217.51	209.326	141.089	99.1617	246.833	187.988	169.573	226.297	149.233	198.303	106.259	103.147	171.988	135.097
MSTRG.4723.24	chr11	10479246	10531744	+	686	16001.6	17022.2	17358.8	14791	19745.3	12955.2	25391.2	26528.5	8314.02	12183.4	16748.5	15437.1	10414.6	17938	9905.12	15405.9	13977	20796.5
MSTRG.19765.15	chr3	15684015	15780207	-	219	86358.1	61296.5	54587.4	59488.9	57974.3	42291.1	62219.7	100330	30557.5	44232.4	63032.3	62577.5	39970.4	65577.8	47221.3	61962.6	53119.8	41002.7
MSTRG.30166.1	chr9	97723312	97727748	+	735	24.5041	18.6327	25.5394	17.8719	19.1687	19.7365	8.4685	3.936	35.853	14.842	24.5931	30.0666	32.5252	29.3838	18.0602	62.9759	35.7141	22.9019
MSTRG.23036.2	chr4	183735473	183740288	-	639	390.803	1115.19	885.295	489.183	959.756	1216.22	333.7	11.6418	1021.31	254.836	672.879	966.715	527.956	406.424	588.668	173.796	49.0217	40.3474
MSTRG.14862.1	chr19	27731929	27734211	+	255	2.7165	2.7308	9.2017	2.6193	89.918	12.6417	10.2361	7.2933	2.5516	10.8894	52.2929	30.5868	14.5473	6.3521	10.4112	21.9418	6.1764	11.6982
MSTRG.17496.5	chr2	191830285	191879615	-	4427	668.693	189.596	1176.52	872.258	1697.34	303.345	78.1916	50.0385	502.661	438.264	315.47	603.662	754.89	1220.36	240.815	1336.03	197.215	98.1865
MSTRG.1968.26	chr1	153036165	153122643	+	253	1014.43	15277.7	28373	3776.98	3360.91	39212.3	4564.9	553.769	17228.5	53073	43920.7	24536.5	31804.1	5348.06	9147.02	1007.92	22809.4	573.532
MSTRG.9671.9	chr14	106092110	106238531	+	467	344964	6847.27	4150.22	458.631	3283.11	37840.3	7509.9	8947.57	2234.84	12630.3	46431.2	5529.89	6042.7	16743	4699.63	17719.3	12166.4	2672.33
MSTRG.22128.4	chr4	71346828	71372591	-	459	3.0184	13020.9	0	3.8805	21.0651	1.7558	13.5607	183.682	9.2142	0.4321	8.3927	30.0204	0.449	14.7039	0.723	30.6595	10.6753	19.9612
MSTRG.18763.1	chr21	16795389	16798223	+	517	18.0882	1.7959	7.8393	13.7805	127.173	5.196	1.9418	6.7948	35.8684	1.9182	4.5853	13.5777	7.5738	89.8139	3.2094	9.1826	3.3849	0.8243
MSTRG.19765.20	chr3	15685548	15780221	-	214	104656	67022.8	62590.1	65732.2	68739.5	48485	71796.8	112196	36625.8	51315.4	75373.5	68874.9	45951.5	74406.6	53417.2	70004.6	61919.5	45164.8
MSTRG.29312.1	chr8	128128798	128231333	-	3029	35.5618	367.299	322.397	441.46	209.311	937.165	1045.82	93.8043	83.1323	732.149	307.185	210.634	115.46	56.6844	1598.64	265.717	120.402	92.8551
MSTRG.23804.3	chr5	79881398	80014722	+	404	30530.8	33097.1	29249.6	26465.1	37075.5	22623.9	49228.3	50093.9	15368.8	22167.8	28872	28262.7	21540.1	32612.8	18413.5	29858.1	23751.4	37636.1
MSTRG.6935.10	chr12	52881125	52881721	+	484	3127.94	7949.13	15400.8	9763.54	13593.5	12965	4423.92	604.557	16173.9	15061.8	15977.7	12311.8	16554.6	6783.12	6209.61	7094.5	14885.8	186.66
MSTRG.7445.1	chr12	95500400	95542317	-	2366	42.0136	21.4853	66.2655	63.894	82.8996	25.0924	12.8143	7.0744	159.642	44.7656	57.2363	97.4679	49.6489	90.7106	48.2495	104.482	46.6714	35.2122
MSTRG.22294.1	chr4	83742771	83745701	+	1160	34.6356	39.6204	29.6062	47.5991	27.1491	33.1163	33.5797	25.6521	64.2252	24.7929	33.7199	34.9639	40.862	40.7273	42.0541	42.8261	41.7886	44.8191
MSTRG.10694.3	chr15	77730300	77910963	-	345	1277	1502.38	1485.15	1656.58	1371.66	1609.48	1483.49	1212.9	1386.2	1366.56	1155.24	1168.06	1038.8	1468.76	1399.57	1055.64	979.995	2086.28
MSTRG.27803.1	chr7	128885636	128897051	+	2315	15.2606	16.0428	16.8622	30.4869	25.6564	14.8533	14.8312	7.4088	47.7811	31.8721	47.105	23.8088	31.6029	21.1073	23.5811	30.1749	62.2891	52.8314
MSTRG.6.3	chr1	566160	630362	-	466	18348.7	28708.6	23782.4	22299.9	18598	23001.8	27976	37086.5	15854.1	20801	22621.9	16651.5	20345.5	12402.7	32539.3	21229.5	27156.8	38874.6
MSTRG.25431.1	chr6	42184098	42230380	+	202	708.144	698.656	493.152	842.068	560.714	448.17	307.142	251.653	671.604	603.868	501.701	724.619	722.323	808.555	358.141	856.986	791.828	727.828
MSTRG.28364.24	chr8	26190919	26237654	+	1213	321.514	560.301	422.755	800.443	391.493	700.712	465.3	310.389	445.221	1049.11	767.077	418.595	748.231	410.621	516.798	331.833	523.699	385.045
MSTRG.12819.3	chr17	33474362	33478373	-	202	13540.5	18088.1	6706.65	9655.12	8624.05	9716.1	7213.37	20549.7	6123.35	9016.78	18221.1	12838.5	9169.83	11329.1	4987.69	3563.08	3083.28	3166.58
MSTRG.2660.1	chr1	203255970	203278730	+	1741	684.954	193.722	127.178	290.93	172.798	414.295	945.226	180.768	142.578	245.736	227.393	251.924	755.69	191.812	523.23	173.154	181.231	658.193
MSTRG.21499.1	chr3	188125765	188207035	-	10559	51.7943	39.1519	41.9392	41.5805	50.1805	25.5177	34.9887	25.637	65.3501	54.5872	28.0919	44.8373	38.3326	62.0515	39.5059	53.102	27.5782	37.9575
MSTRG.15334.1	chr19	50634984	50640579	-	223	6.2127	63.4945	19.1311	29.9517	14.8657	71.074	61.2261	36.1392	14.5889	162.766	187.363	26.8149	14.7865	24.212	81.1038	17.4873	9.417	13.3769
MSTRG.16664.1	chr2	102332042	102338388	-	851	40.6999	62.1894	35.0924	27.732	18.5035	68.5005	19.819	9.2273	48.1692	25.4048	40.3923	33.3004	32.6929	55.1982	31.1968	45.6253	15.8342	19.2794
MSTRG.8993.2	chr14	50320250	50366063	-	531	245859	98149.3	105888	103429	135146	92227.1	106314	190610	70809.9	112942	153834	111666	92247.6	148542	70114.7	122192	109016	59639.6
MSTRG.4153.1	chr10	98583632	98655997	-	2080	116.063	157.35	159.881	171.583	110.635	135.738	96.8211	77.8882	231.018	139.603	141.467	215.24	140	174.698	147.74	139.39	181.477	152.328
MSTRG.30675.20	chrM	15234	16571	-	583	16723.1	31831.8	16550.9	19674.1	15442.8	25534.7	19731.1	44569.9	14597	22876.2	17666.2	13493	18280.9	9071.34	24905.1	12331.2	19111.2	30647.6
MSTRG.23048.4	chr4	185297314	185303446	-	3129	30.7725	7.9376	2.7269	3.7	2.9135	5.6663	1.8609	3.8304	1.9755	1.7115	6.9133	3.4898	2.3052	5.5218	2.8636	5.2561	2.6286	2.5196
MSTRG.30675.10	chrM	646	3737	-	1023	4.30906e+06	4.59804e+06	4.1561e+06	3.75223e+06	3.64133e+06	4.66313e+06	5.83222e+06	6.18519e+06	2.47245e+06	4.55005e+06	4.88789e+06	3.68056e+06	3.9584e+06	3.75297e+06	4.6393e+06	4.56395e+06	4.62432e+06	5.45428e+06
MSTRG.1904.1	chr1	152466516	152552980	-	637	160.944	1390.17	1104.4	595.224	1385.61	1040.81	1014.96	357.488	3525.55	2981.69	4528.63	3126.79	2214.54	765.816	387.339	187.384	1041.75	32.1117
MSTRG.28548.1	chr8	46841546	46847436	-	286	370.577	5.6812	3.7292	1.5569	0.9659	0	7.7225	0.7225	0	0	0	4.5452	2.8823	2.8318	6.3818	3.557	0	23.0955
MSTRG.6497.1	chr12	20613908	20704506	-	321	57664.5	41931.9	26487.2	32650.5	40465.6	30347.5	15919.6	12640.6	29479.6	15968.2	28661.5	46515.1	18914.4	29376.4	15680.4	10370.6	10207.7	27188.6
MSTRG.11629.1	chr16	50693880	50794431	-	1570	189.282	132.027	301.897	210.445	203.583	250.499	92.3358	55.4117	284.925	215.399	339.171	291.948	377.519	210.812	180.935	128.405	100.652	70.301
MSTRG.2603.1	chr1	200792701	200795143	-	1314	8.1713	18.5483	15.5844	18.8076	20.8137	16.1509	15.2805	5.0324	28.7204	12.8304	20.7474	24.1389	31.0541	21.367	33.8422	29.2907	16.248	14.2698
MSTRG.30675.11	chrM	646	1435	-	497	1.72738e+06	1.7605e+06	1.74018e+06	1.59924e+06	1.90962e+06	1.8069e+06	2.8517e+06	2.66418e+06	1.07228e+06	1.68546e+06	1.84808e+06	1.40898e+06	1.69498e+06	1.56708e+06	1.56724e+06	2.10981e+06	1.83402e+06	1.87393e+06
MSTRG.11007.1	chr16	223469	227522	-	243	161.063	1408	144.841	206.149	30.6949	100.6	12133.9	2617.47	9.3717	204.057	23.1695	25.6778	77.1764	42.2166	286.789	10.4661	527.878	3074.23
MSTRG.8945.38	chr14	50041256	50119054	-	960	115517	52107.9	61857.8	47575.1	74801.6	44479.6	46152	88285.3	37932.1	50530.1	82584	60769.4	47850.1	96352.3	36344.4	65612.9	52536.2	23126.1
MSTRG.8833.1	chr14	32606262	32609254	+	2128	5.6966	12.6531	12.5301	11.1948	12.0731	10.0991	5.85	3.9814	23.391	6.2448	7.6588	10.7514	8.2318	9.5147	9.5128	7.9676	11.7598	9.8126
MSTRG.31101.3	chrX	73040491	73061505	-	4238	0	0.4929	0	0.3152	0.1956	0.5705	266.688	2.8768	0	0.3744	0	0.3067	0.3404	0.1911	0.9397	0.4801	1.404	0.6033
MSTRG.3521.2	chr10	45950050	45955296	-	2215	41.1249	25.0458	22.7276	29.9535	31.9283	21.4666	18.1296	39.8358	30.2567	32.8632	30.7698	30.6351	34.2392	30.9575	25.9941	42.6364	39.1082	30.2056
MSTRG.28748.32	chr8	70573702	70602518	+	223	186885	97817	50813.2	76957.9	90544.5	98805	41029.6	85793.6	109092	43001.4	79592.2	102277	62422	62022.7	28724.1	23445.1	27477.2	38129.8
MSTRG.23803.19	chr5	79935469	79948402	-	2019	5987.72	6478.88	5595.77	5090.53	7187.54	4415.53	8524.78	9920.26	2919.14	4144.09	5567.38	5444.93	3951.98	6271.08	3568.81	5652.44	4550.41	7205.06
MSTRG.19765.21	chr3	15692336	15780221	-	227	98487.2	62997.4	58883.5	61801	64632.5	45612.5	67559.5	105459	34362.1	48170.4	70923.8	64763.3	43112.9	69950.4	50263	65744.6	58039.6	42298.6
MSTRG.24031.1	chr5	106914500	106927386	-	5557	3.428	28.9888	5.2589	25.7618	16.2561	19.3367	25.8344	28.8191	20.0223	32.8372	39.727	33.4985	37.8647	17.732	30.9939	35.8811	41.506	46.3955
MSTRG.19765.1	chr3	15658366	15878558	-	278	102041	60550.6	52204.6	57639.2	59173.1	45312.5	59649.9	89920.6	31311.6	47415.5	61641.2	59892.6	39311.4	66453.8	48739.8	57911.3	54305.1	39178.1
MSTRG.5322.29	chr11	65266516	65330071	+	759	63228.5	57557	64180.2	69797.2	80452.9	61513.3	42924.5	36127.8	120810	55036	55643	133267	61186.2	65422.3	47214.9	71860.6	38510.9	34481.3
MSTRG.3538.2	chr10	49203333	49207818	-	304	13.672	71.0102	37.8909	116.447	169.933	75.112	202.107	14.9544	280.386	126.575	408.423	93.2193	170.835	79.0355	127.175	19.5206	100.74	12.6162
MSTRG.8516.9	chr13	110070765	110093206	+	390	246718	236328	244807	225318	288987	224197	417569	460229	125516	192554	216953	209005	247708	232206	203396	345509	231224	266775
MSTRG.4725.11	chr11	10507696	10539287	-	2990	3671.95	3962.18	3760.71	3469.92	4588.96	3003.42	5225.93	6163.47	1935.02	2917.04	3845.01	3583.74	2448.09	4064.45	2348.24	3586.65	3320.42	4799.52
MSTRG.11599.1	chr16	48626859	48652308	-	863	197.058	176.712	290.183	256.437	257.368	193.928	76.0798	61.5377	293.29	190.299	418.222	419.053	202.982	294.677	190.346	258.157	130.388	95.5502
MSTRG.6933.24	chr12	52862300	52961998	-	863	24654.3	62501.7	94094	69547.6	102129	83803.1	29195.8	3940.33	143174	100495	120931	88031	109789	40277.5	44100.5	42364.1	100525	7680.06
MSTRG.7228.1	chr12	67178694	67242694	+	1932	182.321	180.337	289.936	734.3	428.108	166.298	204.215	68.1321	595.602	296.694	191.262	303.588	415.266	503.457	366.038	365.692	708.33	170.504
MSTRG.23803.21	chr5	79944197	79960896	-	1421	8516.8	9215.68	7752.03	7248.76	10235.4	6284.11	11842.7	14104.8	4160.88	5906.2	7931.79	7752.43	5629.89	8929.7	5083.4	8031.88	6487.65	10249.5
MSTRG.23441.3	chr5	52284546	52287256	-	1608	17.6624	25.8392	49.4809	21.1841	23.7084	10.1908	8.7407	11.5658	25.0879	19.3656	17.8754	40.5827	11.5347	63.9653	15.7879	38.8026	28.6224	12.9859
MSTRG.13523.1	chr17	70550977	70563446	+	3008	15.7749	18.443	28.4369	34.7136	14.1433	67.2482	8.8111	4.8775	28.0124	9.627	13.7918	22.8181	33.5028	41.1049	20.1342	12.7952	8.7849	5.7377
MSTRG.29613.1	chr9	14225278	14233428	-	3577	9.4892	29.5908	17.4132	14.5025	10.1945	9.688	18.1308	22.6457	11.8237	18.2984	18.2253	4.7971	18.667	14.6416	24.8637	11.7553	21.7709	40.0892
MSTRG.12998.22	chr17	39660835	39724977	+	645	499.934	8680.18	1174.7	17507.2	692.991	6399.36	11616.3	4314.18	1906.1	20511.8	552.683	3622.09	8561.69	493.469	14972.4	1050.95	18627.8	6922.44
MSTRG.30946.1	chrX	47277136	47305158	+	555	24.9626	25.094	21.9077	33.2959	27.3765	15.4889	22.4301	19.7334	13.4823	26.4458	15.4837	17.801	22.2796	29.1853	18.5361	21.3848	37.207	33.4008
MSTRG.11684.4	chr16	56623448	56661019	+	628	680.027	540.749	1390.26	453.082	612.334	589.886	1459.53	479.752	392.679	229.927	1168.32	867.73	377.06	1541.97	640.196	1984.12	640.921	266.682
MSTRG.26803.25	chr7	18548308	18586879	+	4850	41.4199	14.5015	62.85	50.9549	190.473	17.669	8.7352	7.8396	36.4239	11.1645	22.0565	24.873	18.909	119.619	17.7218	56.4586	10.7886	22.4058
MSTRG.19088.1	chr22	18746415	18851599	-	370	77.6961	50.8153	89.3604	55.9611	170.979	65.3438	35.2731	27.9246	94.9621	35.9163	74.482	70.2669	80.7636	175.841	60.0928	142.972	43.0403	36.8561
MSTRG.22562.1	chr4	113076977	113140826	-	4002	31.7623	55.9128	40.2958	88.2887	71.1689	43.8329	72.8487	23.5971	70.3181	57.59	36.504	69.2521	59.5807	60.9139	85.4102	43.934	46.0455	80.5019
MSTRG.16546.1	chr2	92299373	92302696	+	253	2.738	15.5969	3.3725	35.2002	15.2868	9.5562	61.9023	61.2576	18.0026	3.1359	2.3425	31.8562	16.2914	6.4023	21.6428	14.7435	16.6007	20.2126
MSTRG.3.11	chr1	568956	569697	-	345	6887.97	12757.1	8648.72	8017.66	5991.11	8562.08	8212.42	16912.3	7257.29	6801.17	7127.29	6751.39	6784.72	3417.19	23665.2	15449.3	6360.84	15392
MSTRG.23803.2	chr5	79869303	79962884	-	761	16069.4	17793.3	15289.5	13896.2	19406	11867.3	26107.9	26463.5	7947.36	11205.5	15110.7	14751.3	11915.9	17258.9	9635.16	15581.1	12320.5	20132.3
MSTRG.18727.1	chr21	15230654	15256160	+	6186	4.8152	7.3921	0.1379	160.52	0.2679	5.9928	58.6842	75.829	0.263	25.2659	0.8622	2.1855	14.1589	1.2656	9.0126	0.0548	5.8276	34.8235
MSTRG.20465.5	chr3	96320745	96337000	-	516	9122.05	11393.2	9395.23	8550.54	7663.38	8822.81	10222.6	14919.5	3306.29	9471.67	8860.5	8390.65	6724.97	9774.68	6977.98	8714.11	8569.87	11506.8
MSTRG.27852.19	chr7	130771767	130813474	-	940	600.228	289.161	107.791	171.481	93.7501	598.429	363.764	203.125	149.169	117.74	102.769	113.399	368.544	202.186	261.954	138.526	120.824	657.13
MSTRG.17496.4	chr2	191830283	191879429	-	4383	675.169	191.5	1188.18	880.963	1714.44	306.391	78.9766	50.4937	507.707	442.664	318.637	609.722	762.468	1232.67	243.156	1349.6	199.195	99.1722
MSTRG.7204.1	chr12	66379388	66451502	+	303	33826.3	116735	33335.1	36973.1	26316.2	33507.7	50385.3	14267.9	65757	29220	19714	8041.6	20593	29475.1	23054.1	17027.2	13208.1	33368.3
MSTRG.2114.1	chr1	159052109	159083732	-	3253	22.6787	5.2089	41.5083	26.0763	66.5796	3.8813	2.4072	6.7335	14.4015	6.7679	5.5567	3.7564	9.4396	44.8971	7.7532	73.3868	12.3193	23.1873
MSTRG.14856.1	chr19	21607364	21608464	-	293	81.5651	49.1174	10.1924	140.575	47.1424	54.0939	62.36	107.2	51.0762	94.0947	52.5903	90.5076	51.3458	58.0468	88.3439	93.7447	219.197	92.3565
MSTRG.6044.1	chr11	124583362	124657932	+	539	339.288	301.454	206.98	313.515	248.065	265.147	266.348	413.668	372.413	328.978	421.674	217.541	234.38	328.565	336.474	312.049	317.206	341.947
MSTRG.29604.4	chr9	9389354	9443860	+	229	153900	67691.7	73652.2	87303.5	104991	44561.9	53125.8	103315	49091.2	47349.5	81022.6	94459.5	67217.5	95438.7	35335.4	64991.2	47941.4	25683.4
MSTRG.7245.1	chr12	69673837	69748010	-	551	1067.36	11697	1623.65	957.639	660.303	442.688	353.47	7003.34	150.562	833.331	290.948	216.106	1429.14	1191.56	218.025	492.651	424.317	220.035
MSTRG.5322.4	chr11	65266516	65317812	+	1188	40384.3	36751.8	40998.6	44574.3	51389.1	39274	27408.9	23068.4	77171	35150.5	35537	84954	39077.8	41780.3	30142.7	45899.3	24586.1	22018.9
MSTRG.12998.21	chr17	39660835	39684384	+	781	399.13	7081.27	961.679	14429.5	567.365	5279.5	9576.26	3507.89	1547.52	16883.1	443.92	2967.39	7015.12	391.638	12315.2	864.035	15345.3	5687.26
MSTRG.9003.5	chr14	51955855	52128776	+	4401	348.402	620.092	1375.69	1346.42	1214.99	639.94	592.685	73.8109	1846.66	887.701	1041.22	2078.19	604.492	786.398	2201.1	974.194	578.281	637.044
MSTRG.1669.1	chr1	145325345	145330671	-	596	92.4004	100.871	101.287	110.947	70.9176	116.289	51.8808	39.8722	129.369	61.2336	57.1771	100.331	140.388	101.463	103.844	87.0512	105.117	74.004
MSTRG.990.1	chr1	62390078	62391208	+	782	89.9109	145.149	107.747	128.403	110.219	149.089	116.312	71.6113	119.4	125.55	96.2492	62.171	86.9674	107.709	123.491	72.1999	73.8488	161.304
MSTRG.29312.6	chr8	128209017	128231333	-	6728	3.2947	51.7162	47.4942	76.872	23.4865	156.598	182.462	14.9269	6.4796	134.607	57.3009	27.1271	10.384	6.2997	279.079	34.4242	9.0777	7.4424
MSTRG.22128.2	chr4	71346828	71372591	-	459	3.0184	13020.9	0	3.8805	21.0651	1.7558	13.5607	183.682	9.2142	0.4321	8.3927	30.0204	0.449	14.7039	0.723	30.6595	10.6753	19.9612
MSTRG.14862.2	chr19	27731929	27733908	+	291	2.3805	2.393	7.3303	2.2953	56.9596	6.462	8.9698	6.391	1.118	6.8159	39.7138	25.9094	9.9148	4.6386	8.553	18.6447	4.2096	8.0544
MSTRG.26494.1	chr6	170685929	170687824	-	1225	61.0718	96.4479	93.509	103.233	135.083	42.7624	46.0578	43.5214	46.4762	36.4304	39.4295	131.161	24.8986	31.5141	44.9698	100.07	24.5713	25.9168
MSTRG.4723.42	chr11	10530377	10531971	+	499	17534.4	18614.2	16239.9	16201	22871.5	12946.2	24936.8	29799.1	8782.04	11606.9	17126.9	16577.2	11365.7	18715.7	10428.5	17045.4	14460.8	23070.5
MSTRG.5675.1	chr11	87916131	88023970	+	11628	41.4627	18.6246	38.7073	33.1626	65.1673	16.0793	7.5804	3.3232	29.7131	21.3047	18.0426	83.8453	38.8672	54.745	26.7414	36.5114	24.6215	10.2982
MSTRG.23361.1	chr5	39412982	39421039	-	2537	20.0687	32.5717	14.7141	29.0478	37.3493	18.0008	16.6992	9.3669	22.4412	13.0561	14.8338	14.4495	18.4397	30.6463	46.8287	35.4205	29.109	62.8221
MSTRG.4723.33	chr11	10513973	10578206	+	561	19728.7	21464.6	20451.7	18943.5	24780.6	16309.7	28197.7	33114.3	10649.6	16134.1	20820.5	19501.4	13448.2	21952.7	12925.5	19484.1	18159.7	25665.4
MSTRG.30938.1	chrX	45629676	45727085	+	11933	67.2801	248.284	368.527	599.506	111.029	285.722	158.417	31.4648	380.923	380.897	137.473	241.163	371.812	218.699	429.232	155.228	331.828	266.267
MSTRG.1963.6	chr1	152957968	153005211	-	296	1436.91	61203.4	30181.5	79664.1	6374.38	49543.3	134002	47062.8	23262.4	226515	30526.6	39064.9	70369.5	7831.69	104019	11467	152650	45746.2
MSTRG.12510.14	chr17	18967227	19093549	-	385	2060.14	1591.07	2515.97	1852.84	2108.86	1896.5	2405.78	1999.87	1575.12	2311.09	3227.26	1855.03	2382.57	3223.44	1626.96	2040.77	2019.08	1524.73
MSTRG.18737.7	chr21	9770076	9827883	-	649	2.57367e+06	1.42579e+06	1.34012e+06	1.33221e+06	1.60215e+06	1.34122e+06	734243	768058	2.30829e+06	768181	1.61101e+06	1.3498e+06	1.01404e+06	757128	793605	647189	669842	1.73017e+06
MSTRG.1599.2	chr1	121484058	121485440	-	704	27.5511	44.5115	39.693	25.6164	488.546	67.5405	76.7206	43.7354	38.8182	75.5058	455.433	165.816	90.7483	57.9042	71.8864	171.959	67.1162	54.4792
MSTRG.18804.1	chr21	17635103	17687996	-	8811	4.0882	13.5936	1.7431	36.9173	9.1552	10.1222	30.9918	10.7414	112.063	57.4028	165.063	15.1667	41.0489	9.8352	41.3549	11.4689	143.697	191.02
MSTRG.12510.2	chr17	18906001	19093558	-	934	1039.81	832.796	1232.6	962.791	1026.64	1019.32	1142.37	916.173	786.164	1127.42	1554.29	913.576	1298.74	1598.1	1042.82	1072.49	1006.34	899.977
MSTRG.19765.17	chr3	15685531	15854797	-	272	103606	61290.6	52721	58142.9	59862.9	45720.4	60451.2	91496.9	31334.8	47769.4	62581.5	60718.6	39623.9	66604.6	49240.3	58615.9	54727.1	39460.3
MSTRG.18293.1	chr20	23666277	23728399	+	201	709.944	19.632	32.8989	26.584	164.928	17.3745	16.9819	14.393	422.447	9.8678	16.2169	27.1629	41.0122	181.319	17.3358	299.455	15.6716	19.0813
MSTRG.3981.1	chr10	85926428	85932205	+	980	48.4192	27.2385	176.962	26.3534	149.685	43.3107	46.5085	9.2778	233.709	111.922	397.622	168.461	79.0699	108.537	36.2332	58.1316	61.964	2.8265
MSTRG.30675.2	chrM	1	14673	-	1063	4.78783e+06	5.97567e+06	5.0214e+06	4.68953e+06	4.15979e+06	5.48648e+06	7.22337e+06	8.81409e+06	2.82578e+06	5.8574e+06	6.23428e+06	4.49223e+06	5.11914e+06	4.26241e+06	5.7443e+06	5.57519e+06	5.86666e+06	6.34716e+06
MSTRG.1686.1	chr1	146224866	146226851	+	446	79.9881	98.8849	112.395	163.736	129.455	137.932	78.3334	44.9424	161.208	85.8303	80.3935	121.833	221.335	144.667	117.935	161.947	133.8	71.184
MSTRG.19559.1	chr22	44034045	44042074	-	1269	25.9289	41.5217	52.2774	24.0361	66.1791	29.425	20.0944	14.8183	44.352	22.976	66.5508	41.7947	43.361	41.0583	28.243	48.2331	32.4073	14.9438
MSTRG.6937.5	chr12	52909042	52909469	+	374	125.022	153.298	248.674	343.486	234.151	139.346	71.9392	20.4432	350.56	242.361	202.833	294.05	470.582	194.894	297.25	254.779	265.774	249.536
MSTRG.5312.32	chr11	65192494	65248670	+	13572	1090.01	1758.72	582.946	1048.75	686.544	2857.67	1130.12	415.995	1346.78	1881.15	685.511	2353.51	1452.19	754.594	2345.71	1030.38	728.248	757.221
MSTRG.12510.12	chr17	18967153	19093549	-	453	1803.65	1392.2	2161.37	1624.35	1807.54	1673.49	2082.32	1707.42	1350.89	2007.08	2764.4	1592.07	2120.46	2785.45	1529.98	1801.43	1741.49	1359.82
MSTRG.29382.1	chr8	135812856	135879897	-	1637	140.912	161.08	232.337	223.593	232.378	137.19	244.451	229.995	315.595	228.392	116.938	168.349	185.566	225.932	218.332	212.637	209.315	217.76
MSTRG.15244.1	chr19	46799402	46892862	+	299	334.772	1246.77	800.455	960.558	666.152	516.607	923.345	944.058	1449.31	524.715	465.797	1317.33	326.016	545.345	531.635	504.682	466.469	570.811
MSTRG.20680.5	chr3	119729102	119813264	-	1285	475.465	507.953	748.833	736.361	584.756	599.988	335.788	197.476	633.45	789.67	430.077	770.858	632.212	576.693	1133.6	810.544	485.64	367.45
MSTRG.4356.1	chr10	116081869	116086870	+	730	13.7594	8.5852	28.3442	16.7743	91.5802	14.3518	5.501	5.3784	43.2292	20.3778	32.0682	23.5057	17.5032	28.4756	14.5471	27.6391	16.541	6.1295
MSTRG.25214.1	chr6	31238016	31323322	+	200	10707.6	4291.89	12441.4	5167.5	8936.82	5378.09	2252.81	397.786	6651.44	8332.41	5194.6	16938.2	8574.23	15489.2	1372.22	5027.18	3724.86	1965.61
MSTRG.29696.5	chr9	21967995	21994319	-	429	470.689	340.333	2215.16	1098.67	3178.53	293.057	1162.12	106.934	2383.5	2958.51	1619.78	1172.67	1375.83	3273.55	153.938	874.628	150.932	43.2109
MSTRG.1564.1	chr1	118266160	118320426	-	929	145.775	55.2189	73.247	59.6745	88.9128	50.8933	36.9584	52.2723	61.2845	48.2515	47.2081	70.2442	53.019	81.0763	44.8309	75.0111	54.6284	36.6974
MSTRG.18737.14	chr21	9826836	9827583	-	569	2.93352e+06	1.6251e+06	1.52686e+06	1.51779e+06	1.82426e+06	1.52899e+06	836019	874916	2.63018e+06	875413	1.83523e+06	1.53729e+06	1.15516e+06	862430	904572	737129	763264	1.97272e+06
MSTRG.29834.7	chr9	37130806	37142011	+	10264	13.8353	14.0212	35.164	21.3444	16.768	12.3011	12.1481	11.8984	21.3318	18.9184	20.2093	13.121	18.0506	24.7765	15.6487	16.7502	17.4419	11.2516
MSTRG.31240.1	chrX	102553616	102617503	+	204	397.291	504.063	739.272	345.967	1138.87	338.428	545.271	439.621	655.451	540.583	647.851	1031.03	678.873	819.155	472.569	572.649	416.91	325.878
MSTRG.12171.1	chr17	2499815	2506365	+	1661	31.904	35.3559	41.3525	47.4503	36.2573	55.3121	25.1435	14.6802	50.3375	34.0325	30.3284	38.3486	39.9517	43.7208	33.0657	29.5004	22.6519	47.4639
MSTRG.14284.1	chr18	61304767	61324050	+	1346	538.061	1865.58	1282.88	830.024	485.805	1931.94	2103.92	101.325	1285.38	1663.08	1012.93	1648.97	3631.16	1685.57	2998.91	794.091	644.611	1527.14
MSTRG.12123.1	chr17	1247886	1248193	+	288	484.658	539.194	1267.28	680.292	1189.43	468.247	349.283	449.16	1077.67	517.897	917.788	1006.55	741.339	792.081	353.173	806.543	507.376	258.945
MSTRG.19765.14	chr3	15684002	15780227	-	220	105939	66810.3	62495.5	65107.3	68813.7	48220.1	71236.9	111409	36610.3	51220.4	75209	68390.9	45909.5	74885.5	52946.1	69871.8	61480.4	44416.3
MSTRG.8518.8	chr13	110076468	110086197	-	254	378761	362808	375807	345862	443628	344207	641026	706570	192684	295612	333033	320841	380295	356308	312265	530303	354991	409568
MSTRG.22611.1	chr4	119199864	119230357	+	790	67.0791	126.637	167.139	220.105	154.912	138.738	208.919	145.434	59.3012	176.25	265.193	181.991	240.521	146.942	230.829	251.321	287.53	155.895
MSTRG.16052.1	chr2	48126283	48127840	+	1506	16.0989	19.4203	16.997	18.4795	13.5742	22.4755	10.6659	5.0769	18.7941	13.697	11.4123	13.9834	15.8739	13.4444	19.2811	12.6093	13.7118	21.0811
MSTRG.23804.2	chr5	79878434	79952473	+	554	22044.9	23851.3	20952.7	19025	26588.2	16279.6	35703.6	36321.7	10869.3	15332.6	20687.7	20191.3	16335.5	23359.7	13200.9	21346.5	16863.1	27145.1
MSTRG.1765.1	chr1	148337914	148344434	+	244	88.0085	128.427	120.644	203.479	186.811	158.539	136.6	94.8522	302.666	146.319	123.874	182.204	163.011	190.302	115.606	147.315	135.553	128.369
MSTRG.3313.1	chr10	23415581	23427619	-	494	35.7574	70.9514	138.61	307.371	232.635	35.8906	58.935	82.8242	187.034	72.2709	67.1833	174.728	110.97	153.016	72.8874	64.5253	67.3074	25.8795
MSTRG.31470.1	chrX	149156754	149208558	-	1215	91.5064	82.5313	99.7211	190.94	151.883	64.1188	56.5174	82.1467	87.5588	174.836	172.918	208.632	123.822	171.088	113.487	295.702	278.99	199.22
MSTRG.18660.1	chr20	56560946	56562866	-	1360	0	29.6976	0	0	0	0.3951	0.2953	222.748	0	0	0.2179	0	0.3031	0.1985	0.488	0.2493	0.386	0
MSTRG.23803.14	chr5	79926113	79948435	-	1527	7926.04	8570.78	7410.88	6807.97	9517.11	5860.38	11278.4	13131.9	3867.35	5486.73	7373.03	7212.4	5231.52	8308.24	4722.81	7631.22	6027.79	9533.79
MSTRG.20422.1	chr3	78897563	78912426	+	3325	24.7918	35.8825	35.0281	42.6533	36.4739	31.9131	20.5918	9.3222	73.2856	26.3066	44.4712	28.8528	83.3643	60.8941	20.111	31.7174	73.1049	41.5896
MSTRG.19249.6	chr22	23243154	23265067	-	468	89541.9	4695.95	2572.51	642.234	1724.23	6338.2	3894.73	8519.58	917.606	4706.84	13751.3	1312.16	2442.65	5727.5	1233.82	2523.7	6823.85	1756.04
MSTRG.1759.1	chr1	148004543	148252253	+	384	2551.67	3452.17	2576.96	5011.16	4479.06	3455.89	2425.11	2091.18	4334.39	3005.63	2145.28	3459.73	4236.58	2746.04	3085.65	2714.13	3026.48	2892.6
MSTRG.1965.11	chr1	153004822	153005376	+	458	837.91	9643.09	10705.7	4351.71	6919.02	11024	3584.33	409.224	14012.8	10882.5	16482.3	9582.08	9210.9	3728.8	8353.27	1768.06	5502.54	1118.41
MSTRG.26876.3	chr7	27481908	27496886	-	897	65.2555	80.4784	116.287	73.7173	110.255	74.8706	53.0504	58.7445	96.1129	76.286	99.7665	107.241	102.469	101.124	60.4888	75.0408	78.4277	54.6345
MSTRG.464.1	chr1	28785398	28835236	-	253	3683.97	4884.6	6281.32	5974.35	7605.18	4779.17	4120.47	4725	3101.59	5649.26	5800.03	7704.06	4781.53	7684.9	3123.12	6676.81	6252.24	2006.1
MSTRG.23804.27	chr5	79935568	79948279	+	1287	9393.33	10163.8	8777.94	7985.15	11275.6	6926.92	13373.2	15562.4	4579.44	6500.8	8733.91	8541.21	6199.73	9836.79	5598.36	8866.83	7138.25	11303
MSTRG.18245.1	chr20	19326863	19422518	+	6700	33.0331	56.5748	31.2327	109.127	29.9756	157.814	54.4518	18.1043	180.827	167.645	68.9512	71.6324	143.707	58.7876	85.391	91.4814	173.824	138.403
MSTRG.8353.1	chr13	80147333	80219982	+	674	54.4714	24.4517	55.3851	48.2279	98.7793	25.907	5.6601	11.957	146.255	13.5368	52.7584	176.282	26.6017	99.7344	24.6184	661.6	37.1289	47.4201
MSTRG.29605.1	chr9	9375467	9442248	-	204	69386.7	40500.3	47416.9	61920.4	61977.1	22136.1	31273.3	66883.2	24746	26270.8	43840.3	68574.3	39488.8	59664.7	19534.8	37638.6	28083.1	15419.7
MSTRG.23726.1	chr5	75508283	75537298	-	292	195.715	162.96	204.546	166.218	165.563	88.3186	114.833	89.8752	137.041	135.852	159.326	138.898	201.146	265.341	195.477	212.519	158.218	148.131
MSTRG.8945.31	chr14	50037757	50105007	-	1314	90866.8	42034.1	50155.9	37073.8	59076.8	34027.4	34068.5	75354.4	30710.1	37208.3	60843.4	51945.7	38380.5	77034.4	26053	53834.5	43408.3	19611.9
MSTRG.4723.22	chr11	10477050	10531931	+	910	12069.6	12839.3	13096.2	11157	14888.9	9774.21	19143	19999.8	6275	9191.37	12638.5	11646.3	7861.41	13531.4	7470.04	11620.9	10541.1	15681.3
MSTRG.19249.2	chr22	23237619	23253118	-	342	196097	9453.77	5407.02	1134.04	3194.69	14346.1	7739.05	15573.1	1622.86	8848.91	25016.2	2208.37	4382.65	11940.8	3461.68	7446.84	12961.2	3374.3
MSTRG.20544.1	chr3	105537823	105575023	+	1514	708.269	403.219	554.977	408.518	375.334	357.53	521.061	250.864	452.759	234.763	298.871	291.413	465.668	499.629	305.991	319.615	224.817	360.988
MSTRG.6497.9	chr12	20699924	20704511	-	350	52097.9	37850.7	23987.8	29692	36853.9	27204.4	14334.9	11450.9	26411.5	14442.8	25302	42420.3	17124	26427.9	11824	9055.94	9140.46	24508.4
MSTRG.17443.1	chr2	179584093	179643598	+	2136	682.821	491.95	31.1579	213.99	3813.89	3544.21	4759.35	2974.26	3128.59	48.843	226.129	72.2999	418.927	626.124	39.773	838.942	84.3863	1751.88
MSTRG.18737.11	chr21	9826677	9874076	-	492	3.39346e+06	1.88937e+06	1.77557e+06	1.76499e+06	2.11181e+06	1.93246e+06	969124	1.01223e+06	3.04645e+06	1.01819e+06	2.12318e+06	1.7795e+06	1.33647e+06	999295	1.05401e+06	853662	885337	2.29189e+06
MSTRG.12998.2	chr17	39491544	39697272	+	302	2247.87	118475	12477.3	244738	2178.93	97298.6	182862	50934.6	13683.4	379209	7266.86	38034.8	119946	1543.8	247414	13617.9	317294	102496
MSTRG.7394.1	chr12	93438397	93518364	-	348	303.559	395.537	513.052	475.991	517.58	239.302	413.111	498.198	264.567	376.169	412.132	416.13	518.769	651.637	263.196	308.894	452.584	261.445
MSTRG.6703.1	chr12	44120039	44137390	-	416	431.28	260.576	480.977	430.832	467.507	218.912	211.887	236.943	699.153	338.996	423.832	549.349	422.576	530.842	267.24	386.787	499.757	292.465
MSTRG.22484.2	chr4	104470596	104480506	-	2457	2.8193	190.457	126.754	0.0906	160.783	83.6412	3.4322	0	41.8418	83.7935	135.922	71.531	329.722	76.4733	14.1143	6.4867	0.0712	0
MSTRG.19765.6	chr3	15658383	15780209	-	230	85042.5	59090.5	53407.7	57628.2	56924	41436.5	60641.6	97227.9	30165.5	43362.2	61907.7	60487.8	39147.5	64621.1	45884.8	60481.7	52254.8	39723.6
MSTRG.9671.14	chr14	106208529	106267034	+	258	154128	2166.45	2213.32	158.783	1148.92	7802.93	3579.9	3085.22	958.346	4347.41	21396.4	3840.36	2162.31	9531.4	1894.67	10591	4708.02	1720.29
MSTRG.31540.1	chrX	154712311	154741573	+	226	715.701	460.13	373.768	785.154	829.985	370.86	509.96	545.865	488	1005.76	521.849	716.692	567.194	678.493	706.295	1075.82	863.381	788.187
MSTRG.7.1	chr1	569827	570220	-	249	1172.6	2071.36	1956.64	1761.46	1356.86	1531.98	2273.96	2637.39	1047.86	1703.05	1598.26	962.685	1870.5	1232.73	167.927	121.886	2170.97	2997.59
MSTRG.28556.1	chr8	43832815	43838765	-	346	348.358	6.0378	2.466	0.6435	0	0	13.9273	0	3.7611	0	0	1.5028	1.7869	3.121	2.3978	3.9202	0	18.4747
MSTRG.23804.5	chr5	79888450	79948137	+	989	12337.5	13335.2	11708.2	10641.1	14870.2	9110.53	19955.9	20320.3	6073.43	8578.31	11572.6	11289.1	8508.93	13061.7	7377	11934.7	9422	15183.4
MSTRG.30178.1	chr9	99714693	99717039	-	1149	6.9332	12.1211	18.3794	14.1452	16.8301	15.4308	7.6889	3.7768	12.1752	18.298	10.316	13.8027	11.2998	16.4469	15.4519	19.626	13.0983	9.8285
MSTRG.24307.1	chr5	135879357	135905301	+	225	4.6181	43.3289	92.9092	1.979	92.0847	37.012	5.3543	5.5105	30.3644	10.5783	80.3374	17.3325	24.7304	29.996	11.0619	0.7536	0	1.894
MSTRG.1719.1	chr1	147476809	147834665	-	269	16747.4	28782.8	16578.1	32643	29220.3	10960.1	13778.8	32555	7081.14	15571.1	14461.6	29022.9	16494.6	27645.7	9104.45	21121.3	19600.6	18239.6
MSTRG.1232.1	chr1	89696660	89767774	+	1171	936.138	133.602	3381.11	1024.22	806.351	171.367	45.7812	38.1168	541.759	323.346	420.323	257.767	684.08	2658.83	52.5698	584.523	110.439	76.241
MSTRG.1089.3	chr1	68851356	68883089	-	5629	71.6832	190.017	1198.66	7.3172	461.716	45.0033	11.5214	0.4038	206.678	260.606	905.14	115.838	228.895	189.056	102.581	24.6389	0.2176	0.3028
MSTRG.22637.1	chr4	122923423	122997524	-	207	11.7125	32.5191	44.3112	21.5112	34.6986	23.3596	15.5197	31.9447	18.8599	28.7454	37.2197	37.6794	39.8235	44.3419	22.4444	24.5726	29.5892	19.5576
MSTRG.12351.1	chr17	11875015	11880529	+	1350	80.8164	62.0704	140.154	107.692	238.397	115.215	127.016	1.5307	91.0933	179.244	171.211	263.839	278.598	98.1868	489.18	188.264	76.3515	3.6302
MSTRG.10694.1	chr15	77730215	77910976	-	444	996.944	1168.44	1154.96	1289.71	1068.31	1253.03	1154.52	942.922	1083.71	1064.98	900.992	907.615	807.636	1143.09	1091.24	821.022	765.424	1623.01
MSTRG.14981.1	chr19	36048876	36066759	+	298	851.943	612.234	402.286	525.971	708.249	678.801	369.23	429.927	663.767	219.642	456.422	651.714	204.012	550.799	194.325	228.723	151.509	328.907
MSTRG.20976.2	chr3	141598686	141612632	-	12957	25.6352	19.4911	23.6739	18.5062	28.0369	28.9638	19.5253	2.7431	20.8904	34.7182	25.2027	31.0011	28.2639	19.5852	28.1861	32.9627	21.3127	70.8275
MSTRG.17180.1	chr2	162021060	162111179	-	6560	165.681	133.009	232.302	246.704	203.822	121.05	108.351	91.4455	147.689	200.551	160.043	228.876	195.405	213.131	165.194	177.537	156.726	97.6374
MSTRG.23375.1	chr5	40830162	40830451	+	267	11.6749	18.2566	47.9353	37.5238	35.1784	30.1838	33.0883	28.6358	35.3358	24.5144	67.7	81.7939	34.7337	46.5106	29.8297	38.1013	49.8125	19.1528
MSTRG.7245.3	chr12	69693617	69753124	-	544	1070.27	11835.5	1643.76	912.255	621.572	436.533	324.062	7128.02	136.353	836.033	282.164	193.557	1436.17	1196.97	202.53	473.744	395.357	214.641
MSTRG.28556.2	chr8	43834694	43838765	-	336	251.52	5.5267	1.9046	0.6626	0	0	13.1467	0	3.873	0	0	0.7738	1.2267	3.2139	1.9753	3.5323	0	13.9513
MSTRG.9611.1	chr14	103884016	103892117	+	347	132.753	206.7	218.845	246.381	148.079	246.185	80.43	30.9666	392.837	212.633	182.749	181.317	169.264	167.269	321.336	154.892	72.1178	114.827
MSTRG.21521.1	chr3	190024479	190024921	+	375	85.8963	461.144	601.255	435.783	1418.11	191.269	140.282	96.9841	413.824	143.865	122.481	991.42	294.566	300.2	696.455	1042.17	243.132	168.187
MSTRG.19765.9	chr3	15663136	15814307	-	252	103431	63977.4	55816.6	61122.9	61595.9	45459.1	63476.1	98123.1	33049.7	49877.1	66666.4	64994.9	41340.8	70591.3	51546.3	62288.3	57321.3	40657.5
MSTRG.17756.1	chr2	216807361	216809205	+	1153	18.9249	43.082	68.0822	39.3918	25.8764	59.6451	45.1027	14.8754	36.3989	81.1953	93.8067	99.6657	60.5926	34.1845	74.8331	30.4397	30.0519	13.6752
MSTRG.6934.14	chr12	52863226	53070228	+	398	50766.4	125524	189267	145514	201362	160479	57658.8	8388.22	277403	195580	216270	192058	232364	80397.7	95898.4	87503	196130	13476.7
MSTRG.5234.1	chr11	63676720	63677028	-	269	47.6401	56.0883	49.9578	62.0746	59.5641	76.8957	23.1389	24.582	31.4448	57.5123	58.384	118.879	52.8623	55.1971	56.7486	47.2725	56.5982	13.4657
MSTRG.8945.30	chr14	50037043	50119035	-	2064	58153.3	27058.5	32216.4	23706	38193.6	21737.2	21780.3	48114.7	19667.4	23746.6	38842.7	33429.6	25174.4	49525.8	16991.5	35560.3	27708.8	12524
MSTRG.9263.2	chr14	70078355	70113958	+	4530	55.8146	45.8602	58.4842	52.097	42.7493	40.9773	27.259	19.7063	66.5748	43.7407	45.4629	58.3107	46.995	90.5839	42.0863	48.1329	48.4821	62.0409
MSTRG.18737.3	chr21	9761625	9852478	-	593	2.82195e+06	1.5744e+06	1.4693e+06	1.46884e+06	1.76115e+06	1.50815e+06	808618	842529	2.53257e+06	847851	1.76715e+06	1.48317e+06	1.11415e+06	832950	877130	711216	736578	1.90426e+06
MSTRG.9665.2	chr14	106013526	106235897	+	421	444702	11658.9	4585.45	966.717	4057.2	67643.2	8879.4	11879.2	2686.9	16541.7	55704.4	4561.83	7610.02	17643.2	6498.78	18367.4	15256.1	3231.04
MSTRG.19767.4	chr3	15780022	15838089	+	222	89640.7	55710.7	47288.9	50809.3	51202.8	43678.7	56377.3	77956.3	26485.3	45309.9	57981.2	50818.2	37296.1	60408.7	43219	54973.3	52754.4	42654.2
MSTRG.29896.1	chr9	66771447	66801144	+	208	241.45	188.597	32.8172	524.491	126.174	157.565	436.322	712.32	211.154	631.266	102.575	126.244	244.728	312.795	300.744	475.231	497.233	307.319
MSTRG.3683.1	chr10	63763774	63776965	+	3518	38.0027	39.9182	51.8424	41.8322	31.5674	36.2712	6.963	14.9783	58.1679	25.6527	32.0922	48.4798	46.1615	56.8628	21.0358	48.8699	37.6562	31.0103
MSTRG.29604.13	chr9	9389373	9447540	+	210	167849	76141.8	80321.1	95210.8	116735	48597.5	57934.3	112676	53884.5	51637.3	88363.1	103029	73305.9	104081	38539.5	70876.2	52289.8	28014.2
MSTRG.6567.1	chr12	26927955	26955523	+	936	190.57	135.899	167.277	196.714	129.568	108.201	121.201	51.6606	285.709	142.4	166.209	99.4397	285.13	180.264	146.428	182.231	289.048	381.531
MSTRG.758.15	chr1	46126470	46152208	-	1027	110.618	127.925	206.042	238.466	196.095	98.6131	114.763	111.47	231.566	215.725	165.042	252.646	140.869	189.264	140.239	196.131	216.747	117.015
MSTRG.29604.7	chr9	9389358	9456909	+	209	168742	76570.5	80727.8	95704.7	118649	48855.7	58252.8	113257	54195.2	51914.8	88822.7	103590	73704	104614	38751.7	71252.6	52580.1	28170.7
MSTRG.16785.1	chr2	114009009	114012738	+	3694	2.344	6.9749	1.2127	15.6705	3.7392	11.9992	0.8697	0.951	0.5284	30.82	21.5787	26.1818	7.6432	5.8465	4.5817	2.0655	5.4954	0.8075
MSTRG.12510.6	chr17	18961569	19093558	-	406	2295.68	1827.22	2730.5	2071.77	2227.04	2207.97	2582.02	2060.32	1606.63	2483.69	3313.6	1943.5	2863.38	3460.32	2276.4	2354.08	2185.77	2025.78
MSTRG.11165.1	chr16	5941545	5956088	-	398	22.6263	2.3329	55.7398	2.797	88.1515	4.0498	1.5135	4.1536	33.5142	4.4852	114.659	81.6544	4.6602	81.3961	2.0845	17.8923	5.2764	3.2122
MSTRG.4725.13	chr11	10523278	10531763	-	981	10970.4	11720.7	10983.5	10218.8	13657.5	8851.56	15607.7	18486.8	5490.2	8368.24	11354.3	10484.6	7067.65	12028.4	6807.27	10574	9650.82	14392.4
MSTRG.20915.2	chr3	136904824	136930501	-	852	6.9109	9.263	10.265	48.3434	30.4788	22.3863	4.9489	2.4254	38.5665	62.6225	54.2569	78.4235	22.7372	5.0697	64.6574	182.685	80.7215	148.802
MSTRG.9668.2	chr14	106054423	106174998	+	306	256262	7100.88	1429.05	564.606	1851.63	63790.5	2610.87	8068.5	1388.51	8554.05	24180.6	2075.65	4346.67	9935.73	2760.04	2717.24	9643.26	1543.05
MSTRG.6259.2	chr12	6646947	6703867	-	251	10216.8	11974	26192.3	11041.6	15398.7	12699.7	10411.3	6843.89	17827.2	12624.4	15391.3	12647.2	15972.9	16392.5	9502.18	13187.8	14276	6335.36
MSTRG.21565.1	chr3	195027000	195045285	+	953	118.844	145.897	159.368	201.615	211.031	153.627	124.938	62.2312	271.395	282.634	104.165	190.694	187.273	168.55	190.652	164.391	142.129	130.349
MSTRG.9671.12	chr14	106110648	106237957	+	694	156171	4250.39	2204.43	247.022	1552.84	13165.1	3807.69	4473.78	1163.51	5939.73	22365.4	2756.84	2669.92	7867.07	2523.83	9743.05	5356.89	1423.36
MSTRG.4051.2	chr10	90580301	90662652	-	2350	83.2729	97.4901	262.056	264.99	159.052	174.67	127.05	55.3977	143.977	332.964	261.65	295.611	192.932	140.381	204.48	103.895	137.17	60.8395
MSTRG.7531.1	chr12	104869824	104876940	-	5335	23.3068	9.7895	14.7939	14.8566	9.0618	18.4294	3.199	2.5564	23.5996	8.8855	11.4976	9.113	11.666	21.6072	5.1318	10.9326	3.7066	4.3933
MSTRG.23804.21	chr5	79926936	79947494	+	245	48856	52715.7	45591.3	41904.7	58489.2	36092.6	69304.6	80932.1	23651.1	33660.9	45243.6	44442	32238.7	51189.5	29071.2	47005	37153.4	58843.3
MSTRG.29604.2	chr9	9389297	9493717	+	298	118399	53755.1	58542	71067.3	83265.6	34306.9	40938	79684.2	38035.6	36446.6	62384.6	72755.5	62461.5	73687.4	27232.8	50006.1	36928.3	19825.2
MSTRG.6935.2	chr12	52821520	52881774	+	520	16188.8	50727.4	89033.1	41200.1	111549	80791.7	23959.9	1716.72	142278	89677.6	154050	69570.2	100965	40801.4	32088.5	30639.1	81636.8	5033.47
MSTRG.9671.3	chr14	106092059	106238531	+	518	311010	6173.12	3741.61	413.476	2959.87	34116.7	6770.89	8066.63	2014.8	11386.8	41859.8	4985.44	5447.76	15094.5	4237.25	15974.7	10969.9	2409.22
MSTRG.25213.15	chr6	31321649	31350033	-	441	4333.77	1646.94	5137.38	2106.25	3718.47	2468.28	1530.25	65.1321	3673.09	4212.44	2753.62	8320.78	3258.6	6141.22	870.275	2582.47	1085.71	963.908
MSTRG.4725.2	chr11	10438414	10531367	-	305	35334	37786	38533.9	32662.5	43640	28584.6	56100.1	58773.8	18425.6	26996.2	36926.1	34315	23079.7	39699.7	21989	34090.2	30940.4	47218.7
MSTRG.19765.57	chr3	15774528	15854792	-	214	95154.1	59319.5	50449.3	54011.2	53633.3	46221.7	59386.6	81986.8	27981.7	48513.5	60699.8	53103.1	39376	63413.7	45489.1	57627.4	56356.3	45360.9
MSTRG.5312.14	chr11	65112160	65252943	+	12572	1300.6	2056.98	719.546	1266.48	820.632	3319.01	1307.87	554.706	1633.06	2178.53	834.343	2791.31	1684.95	919.707	2692.32	1184.58	854.367	869.415
MSTRG.7762.1	chr12	120729224	120731040	-	483	344.922	292.192	178.422	297.316	392.361	166.298	241.525	264.399	63.3153	189.72	201.845	231.459	188.166	532.662	97.5642	213.43	251.086	79.4066
MSTRG.7860.1	chr12	127627615	127650988	-	315	8277.36	2974.07	2083.68	2405.94	3303.65	3013.84	2468.07	1985.08	3583.83	2069.07	4785.43	2817.77	1525.04	2685.07	868.093	1172.32	1139.44	813.741
MSTRG.15146.2	chr19	43827806	43833457	+	212	91.4903	285.769	801.932	201.637	136.824	449.838	129.753	41.9133	101.283	79.5245	106.23	183.953	247.887	185.918	113.488	56.7835	352.475	8.0405
MSTRG.1963.4	chr1	152956311	153005064	-	221	2178.44	91763.8	50002.8	111753	7312.61	76161.3	184752	64178.8	41371.8	326491	50057.7	57956.1	103665	11811.2	151045	15999.1	210493	62219.6
MSTRG.19765.40	chr3	15720453	15780209	-	297	64213.5	44361.4	40509.2	43475	41225.1	31005.3	46143.5	74295.9	22279.3	32609.8	47151.8	45981	29446.8	48185.4	34769.4	45627.4	39204.5	29684.8
MSTRG.6935.4	chr12	52839894	52881721	+	701	11862.1	36748	62780	29491.5	79688.5	59219.4	17492.4	1251.94	104237	63772.4	109297	48346.6	73581.4	29243.9	23240.1	22249.8	58940	3727.74
MSTRG.23804.16	chr5	79922610	79963308	+	545	22401.9	24209.8	21191.1	19306	27045.5	16542.5	31761.3	36897.2	11058.9	15599.6	20979.9	20551.4	14927.5	23698.9	13414.3	21696.9	17167.3	26865
MSTRG.19765.11	chr3	15663154	15854797	-	248	113779	67342.7	57975.3	63880	65893.3	50224.1	66367.7	100448	34565.3	52531.4	68716.6	66723.5	43571.5	73197.2	54085.1	64483.2	60259.7	43430.2
MSTRG.12510.16	chr17	18967227	19093549	-	356	2227.97	1720.68	2720.93	2003.77	2280.65	2050.99	2601.75	2162.78	1703.43	2499.35	3490.16	2006.14	2576.66	3486.02	1759.49	2207.02	2183.56	1648.93
MSTRG.4725.7	chr11	10504821	10531348	-	635	16744.5	17963.5	16877.2	15577.5	20816.1	13525.7	23662.3	28169.4	8535	12840.2	17396	16156.9	10890.8	18439.6	10440.9	16209.6	14773.5	22164.1
MSTRG.8167.2	chr13	49155352	49173623	+	484	49.3772	68.5807	236.671	42.3202	139.269	48.8429	7.0524	0.4269	63.1845	30.7351	121.224	170.818	42.1541	114.902	7.5422	37.8336	11.5702	37.4201
MSTRG.4019.1	chr10	89010872	89014584	+	3109	11.1404	16.1267	11.6639	19.7648	16.083	14.7754	14.5955	5.3837	16.9521	15.2474	10.7703	18.8991	11.2688	16.4114	21.8818	18.3239	23.3595	15.2832
MSTRG.18833.1	chr21	27522355	27528598	+	2525	7.6816	20.0404	24.4147	22.5727	26.4766	9.3624	11.8483	9.8206	36.7208	16.2602	28.0483	29.9629	9.7126	24.27	21.9485	40.7593	12.4752	10.5482
MSTRG.8239.1	chr13	51905167	51981981	+	4518	102.42	129.88	117.704	170.208	198.6	97.0371	95.1487	55.1138	162.955	118.269	145.146	216.714	184.739	156.374	143.892	148.385	147.498	82.1077
MSTRG.30677.1	chrM	648	3229	+	2355	1.86362e+06	1.97144e+06	1.79399e+06	1.60403e+06	1.57297e+06	1.96717e+06	2.52643e+06	2.61184e+06	1.06725e+06	1.95712e+06	2.10114e+06	1.58876e+06	1.69772e+06	1.6175e+06	2.00048e+06	1.94446e+06	1.99443e+06	2.34569e+06
MSTRG.28748.16	chr8	70502481	70602517	+	217	203187	105915	54302.1	84910.3	95974.8	103846	44498.5	107086	123712	46193	83856.3	106704	65279.1	74541.1	36354.3	29494	29253.1	43582.1
MSTRG.19765.7	chr3	15660083	15780207	-	222	85381.5	60605.1	54022.7	58827.4	57488.3	41958	61460.3	99078.4	30361.5	43791.9	62272.6	61884.1	39562.1	65606.1	46680.3	61358.2	52673.2	40634.8
MSTRG.12510.10	chr17	18966766	19093549	-	667	1273.26	977.198	1498.94	1139.91	1243.35	1184.49	1441.62	1169.22	928.687	1394.35	1921.01	1097.64	1534.37	1935.08	1154.53	1288.79	1222.37	1028
MSTRG.21295.1	chr3	172101925	172108424	+	2307	55.9995	22.236	28.571	9.0716	22.632	26.1998	14.4475	11.7339	34.973	10.317	15.1567	21.9755	7.8611	34.4037	19.4913	42.6265	9.7854	11.1756
MSTRG.16564.1	chr2	89326686	89384962	+	272	9552.81	289.296	265.856	27.8301	156.409	3610.78	126.229	263.621	52.6274	292.411	2155.99	83.1578	129.562	345.395	329.416	542.936	162.775	16.4506
MSTRG.25564.1	chr6	62254279	62284534	+	495	2306.94	2776.99	3559.51	2707.22	2197.2	3033.68	3494.48	4640.89	896.473	3517.29	3223.67	2628.76	1615.38	2970.69	1984.1	2458.31	3313.67	4050.14
MSTRG.15335.1	chr19	50640265	50686726	+	311	10.0232	52.9919	13.0319	38.6579	10.6593	50.9631	44.5473	26.5778	9.4148	100.766	109.574	18.3914	22.5304	20.8332	59.2219	16.9005	9.5659	28.7753
MSTRG.5702.10	chr11	93463520	93469405	-	532	350.913	397.046	539.695	551.999	707.252	394.369	377.039	186.056	583.398	469.015	435.577	958.338	383.507	544.495	507.452	467.22	250.657	144.586
MSTRG.7678.1	chr12	112763201	112843151	+	591	610.079	787.085	1091.46	933.887	887.659	740.907	792.271	764.332	687.548	1086.36	925.581	923.374	1176.54	977.991	704.702	683.653	1080.79	629.849
MSTRG.9241.1	chr14	68601548	68605410	-	3163	3.9421	3.7427	6.137	8.4467	5.0657	4.4164	3.2375	1.9599	10.9027	8.4028	6.7453	9.206	9.8385	9.6446	6.0328	7.9334	9.2396	6.1975
MSTRG.19675.1	chr3	9387960	9449445	+	518	508.167	595.534	688.116	947.729	919.958	483.856	569.022	597.188	790.723	775.761	776.283	498.895	576.485	700.968	544.231	792.764	770.267	487.85
MSTRG.7203.3	chr12	66432930	66467392	-	251	1568.95	94996	21943.9	7802.19	1889.75	27760.5	39991.5	2561.21	12844.8	10825.1	9803.56	3276.26	8800.14	1936	21599.7	1188.21	714.638	10785.3
MSTRG.8233.1	chr13	52286978	52375600	-	730	542.308	652.478	836.007	1012.86	1018.36	800.019	793.241	303.453	1455.09	894.72	1173.13	1424.59	1076.73	980.745	882.6	971.78	1190.71	633.385
MSTRG.6934.13	chr12	52863094	52889310	+	584	17756.1	54096.5	86556.4	54526.8	86242.4	79035.5	26574.2	3329.63	132104	94063.1	107867	68865.1	94736.6	35519.7	35084.7	33398	84366.7	2158.11
MSTRG.19767.1	chr3	15721610	15814291	+	386	66139.7	39117.5	33864.6	37776.9	36127.8	28250.6	40774.6	59174.1	20201.8	31785.8	40815.5	38802.8	25220	44503.5	31982	38358	35178.5	25702
MSTRG.29605.8	chr9	9413138	9461126	-	297	91302.7	39069.5	39510.1	29189.2	65234.1	24705.4	29368.1	59670.9	26975.3	27249.2	44886	53905.9	26184.1	57040.5	21590.7	33455.7	25216.4	15921.8
MSTRG.4725.8	chr11	10506517	10531364	-	918	11573.1	12420.7	11660.4	10766.6	14391.4	9346.65	16364.7	19484.7	5890.02	8874.68	12014.8	11165.6	7523.28	12744.8	7216.06	11205.7	10212.7	15326.3
MSTRG.20610.2	chr3	118052422	118248506	-	8898	3.1919	329.397	102.629	2.4521	4.9364	11.8649	1.1283	1.974	162.447	4.4805	206.842	46.0486	53.3398	13.2585	6.247	1.2957	17.0908	1.5326
MSTRG.9665.3	chr14	106013526	106173902	+	435	183082	4967.89	911.112	614.694	1327.93	46466.6	1997.24	5670.07	1014.89	6237.56	19069.8	1432.62	3131.57	6881.28	2239.84	1587.93	7045.43	1006.59
MSTRG.11394.1	chr16	26043026	26129324	+	750	126.997	94.0857	139.079	131.507	92.0847	87.7543	60.7711	52.6249	89.3582	109.486	99.5656	94.6355	169.266	163.418	122.787	125.694	109.666	113.64
MSTRG.4758.12	chr11	13002216	13011084	-	323	97.5802	79.7686	466.248	207.477	550.798	216.239	165.353	28.1494	349.507	156.587	429.352	577.929	107.191	360.23	379.631	344.875	72.0585	21.7692
MSTRG.17376.14	chr2	181868615	181916506	+	7038	43.8974	45.7774	42.1896	69.69	87.8848	44.4291	34.1775	26.3074	76.1329	53.6863	45.43	81.7864	51.8876	76.3708	47.8121	80.3667	78.2001	60.8222
MSTRG.19765.8	chr3	15660892	15814307	-	217	120133	74302.8	64826.2	70992.7	71552.4	52792.5	73720.7	113951	38392.3	57927.3	77425.8	75487.5	48013.4	81989.4	59864.8	72344.2	66586	47236.7
MSTRG.15111.6	chr19	41961934	42006539	-	909	37.3409	44.1767	17.8347	35.2699	24.3128	40.1919	43.9564	8.1839	27.9164	22.911	22.4934	24.0253	26.526	39.4997	69.3648	34.134	23.4872	81.1042
MSTRG.17280.2	chr2	173366632	173461542	-	2366	797.819	336.112	563.212	295.945	571.657	298.724	161.324	114.588	646.404	163.386	666.672	891.936	253.732	566.627	293.284	955.317	247.706	142.29
MSTRG.1906.1	chr1	152486978	152516030	+	623	63.9341	595.388	671.094	413.119	317.936	472.592	950.106	270.99	807.85	1907.35	967.46	672.295	520.343	251.764	316.142	94.7088	593.817	21.2048
MSTRG.2607.1	chr1	201268419	201301312	-	1510	440.859	726.948	1009.77	1292.94	1624.78	1791.5	496.778	150.808	2312.88	1451.59	2249.73	2177.18	1725.12	869.605	1104.24	515.614	1217.11	385.086
MSTRG.23804.17	chr5	79922610	79950928	+	210	58060.8	62734.1	54851.6	49976.5	69988.3	42875.5	82349.8	95667.5	28556.5	40322.3	54257.3	53142.7	38648.1	61286.9	34720	56148.7	44363.1	69621.5
MSTRG.7996.2	chr13	31032552	31075295	-	2176	440.745	338.899	558.375	463.392	514.422	267.031	335.043	257.258	377.512	331.606	326.15	326.896	516.163	619.081	491.683	435.097	438.141	289.55
MSTRG.29605.7	chr9	9413134	9501292	-	301	90122.8	38581.2	40432.2	30197.1	64392.9	24396.8	29037.9	59049.6	26629.8	26905.5	44342.6	53313	29787.4	56502.3	21349	33034.2	24920.2	15761.1
MSTRG.23804.28	chr5	79940537	79947776	+	527	22926.5	24806.8	21416.2	19483.4	27504.3	16910.8	32642.7	37987.7	11158.2	15854.3	21307.9	20835	15117.4	23989.4	13659.3	21620.1	17399.6	27583.2
MSTRG.17990.1	chr2	238633258	238691472	-	1656	621.81	691.592	639.678	688.09	317.125	647.905	462.801	252.688	498.608	566.405	407.091	496.583	625.602	503.9	639.965	487.56	335.309	299.025
MSTRG.4723.28	chr11	10494743	10531971	+	843	12905.2	13767.5	12969.8	11989.3	16002.4	10448.8	18207.9	21565.3	6602.37	9860.71	13470	12391.8	8384.52	14195.7	8001.94	12462.1	11336.5	16856.4
MSTRG.10424.1	chr15	61381676	61395750	+	9312	5.542	7.6526	2.3365	12.6479	6.319	6.3755	19.3411	10.7182	11.2846	12.5243	4.3278	6.2819	9.605	6.8129	16.0012	14.3841	20.8977	26.2911
MSTRG.26775.1	chr7	11126946	11204680	-	2581	165.194	161.251	236.784	245.5	339.618	128.333	122.292	160.286	342.854	224.164	305.052	319.419	235.231	296.845	221.151	305.73	354.067	178.236
MSTRG.12510.11	chr17	18966789	19093558	-	827	1026.92	788.7	1208.94	919.639	1002.8	955.005	1162.71	943.008	749.014	1124.59	1549.35	885.278	1236.52	1561.02	930.761	1039.45	985.878	829.109
MSTRG.18737.9	chr21	9826677	9827883	-	927	1.80062e+06	997506	937204	931636	1.11975e+06	938508	513158	537039	1.61443e+06	537338	1.12649e+06	943605	709048	529374	555234	452461	468499	1.21087e+06
MSTRG.13013.1	chr17	39659077	39672475	+	232	1106.25	64036.9	6389.24	125541	1124.07	47159.5	88128.4	26153.6	7659.35	181334	3585.29	20913.3	59494.1	849.455	119612	6563.51	135845	47173
MSTRG.4723.40	chr11	10530194	10578192	+	259	35401.9	38586.5	34253.4	33874.1	46381.9	27079.3	50934.4	60057.1	19017.5	25852.8	35298.3	34652.6	24454.3	39164.6	22613	35294.7	31043.8	46032.3
MSTRG.24564.1	chr5	150647820	150648137	-	276	194.512	205.207	388.753	270.235	366.337	249.169	94.5729	68.1321	183.884	278.831	530.381	738.516	545.831	239.642	163.523	333.572	266.303	90.325
MSTRG.29604.11	chr9	9389366	9489514	+	242	145772	66165.5	71565.3	83045.1	102514	42235.8	50379.8	97875.9	46823.8	44867.4	76793.8	89556.1	64038.4	90711.2	33493.4	61560.9	45458.6	24352.1
MSTRG.5322.17	chr11	65266516	65317812	+	1844	26017.7	23677.4	26413.4	28717.1	33107.5	25302.3	17658.2	14861.9	49717.6	22645.8	22894.7	54731.8	25176	26917	19419.5	29570.7	15839.6	14185.7
MSTRG.6772.3	chr12	48111979	48130053	+	1639	8.0302	55.2328	10.0214	133.123	8.0904	133.908	97.3914	23.0723	65.7018	114.722	56.4087	62.1813	82.9878	15.9771	91.6197	22.655	62.7819	74.3615
MSTRG.11006.1	chr16	223125	227132	-	204	285.235	2934.49	291.735	414.723	40.6256	156.704	22314.8	5092.11	12.7582	382.103	59.5558	52.2524	174.769	86.0179	544.959	39.8943	941.907	6107.09
MSTRG.20915.1	chr3	136862219	136930483	-	206	147.958	146.483	203.993	546.875	407.676	251.683	69.2028	32.0998	457.993	781.82	664.577	968.012	316.133	56.3517	844.943	2108.68	1067.83	1600.13
MSTRG.21363.2	chr3	182362010	182365494	+	1959	0	2.8437	1.5244	1.0229	0.7051	0	0	55.4843	0.8304	1.215	1.9664	3.3179	0.7364	0.689	0.7623	1.9041	2.0546	2.5016
MSTRG.11580.1	chr16	47332382	47408793	+	1377	241.468	204.98	230.197	274.542	268.43	181.237	141.585	142.564	378.492	234.21	243.818	310.966	277.326	304.665	217.14	286.032	279.211	227.929
MSTRG.9228.3	chr14	69254379	69266134	-	294	2762.6	3110.71	2656.97	5310.82	2623.48	6763.41	3013.83	1161.13	4453.97	4144.3	2205.31	4347.28	6605.28	3315.78	6262.93	2452.72	3410.7	4799.97
MSTRG.1670.1	chr1	145330075	145365288	-	610	1075.41	1249.64	1019.35	1843.91	1299.75	1665.1	762.656	448.177	2315.2	1018.71	930.27	1416.72	1987.21	1479.05	1529.26	1347.51	1433.56	913.775
MSTRG.18903.1	chr21	36173093	36179105	-	4242	30.1286	20.8481	12.7726	12.0715	18.951	19.1249	3.8813	5.9917	30.2172	8.0422	9.0113	13.4223	9.4736	24.0562	13.9251	18.6658	7.7557	7.0322
MSTRG.19765.16	chr3	15685500	15780209	-	282	69141	48049.5	43391.6	46869.1	46168.7	33592.8	49387.6	79180.6	24292.7	35213.7	50379.7	49157	31806.7	51948.9	37339.7	49113.8	42363.5	32236.9
MSTRG.16419.1	chr2	78581747	78599972	+	17517	6.4656	4.0548	29.6398	0	2.7283	2.5764	0.0344	0.5073	58.596	0.4076	22.4651	0.3117	0.4	0.262	0.3789	2.8457	0.0999	0
MSTRG.1909.2	chr1	152627944	152649050	+	1015	0.6825	42.9935	17.0229	0.2194	11.9756	1.588	0	1.0179	25.001	0.7816	94.8828	192.621	40.8112	5.8514	0.8174	0.8352	2.7586	0
MSTRG.22337.1	chr4	87579002	87600702	-	1230	37.7331	107.379	298.463	210.875	123.304	125.145	94.3529	69.7208	233.552	139.324	209.356	204.608	282.154	128.836	122.355	140.741	365.222	135.987
MSTRG.1600.2	chr1	121484284	121485439	+	816	23.3451	37.8332	33.9835	21.5547	411.334	55.9658	64.714	36.7195	32.2941	63.9269	385.297	139.234	76.7773	49.2949	60.7996	145.863	57.0463	44.6516
MSTRG.25323.1	chr6	35761814	35852487	-	712	649.418	1083.66	1547.41	1134.16	1144.59	1076.05	904.099	381.36	1116.28	1180.31	902.713	1773.54	1659.11	1179.58	1497.55	885.616	737.11	499.767
MSTRG.14683.4	chr19	13925999	13953500	+	1293	335.106	278.974	160.85	174.084	115.8	409.914	159.013	33.4016	143.418	101.703	157.903	163.271	315.425	152.207	237.022	99.0029	63.7468	217.524
MSTRG.3.6	chr1	556159	569606	-	463	23402.6	36934	26988.3	26532.7	25059.8	27278.4	33365.5	64660.7	20236.7	23930.2	27706.2	21813.7	23689.3	15249.7	38721.8	26839.9	30598.8	43591.4
MSTRG.17048.1	chr2	149490410	149639410	-	839	542.033	532.297	429.675	507.112	632.849	363.411	541.81	1560.28	395.518	482.738	543.206	621.305	559.062	629.379	784.548	1155.93	588.615	1054.2
MSTRG.19249.5	chr22	23243154	23261211	-	396	99548.5	5325.26	2976.13	734.265	2000.75	7303.36	4545.06	9779.5	1068.83	5458.45	15947	1542.86	2866.48	6589.57	1396.14	2877.22	7802.93	2064.02
MSTRG.9233.1	chr14	68426695	68462314	+	318	703.604	480.297	1215.48	1113.91	1044.21	482.362	448.295	445.775	1453.77	1014.8	988.686	1410.31	1292.25	1234.36	696.062	993.311	1381.28	1439.93
MSTRG.6935.3	chr12	52839586	52881728	+	390	21395.9	66204.6	113225	53232.3	143617	106828	31558.9	2259.29	187810	115007	196904	87161.2	132689	52755.8	41924.9	40157.8	106321	6703.65
MSTRG.23629.1	chr5	69786972	69808985	-	733	247.127	216.286	229.318	294.931	328.264	183.611	155.04	165.765	378.594	219.45	224.771	237.287	362.971	484.683	251.721	362.926	384.616	400.277
MSTRG.27097.3	chr7	55838662	55841376	+	595	24.4487	15.2145	45.889	0	0.4643	30.2497	14.848	8.6824	12.5759	40.6688	47.3126	21.4107	31.5191	58.9837	17.5688	31.0605	21.4705	1.0743
MSTRG.1183.1	chr1	82232815	82235591	+	1568	1.1045	10.5105	4.4893	21.8665	17.7944	13.8772	12.8052	2.504	13.4864	28.8408	21.3551	16.5808	23.2636	8.2642	20.5293	4.9741	12.3883	2.3101
MSTRG.15517.1	chr19	58908409	58936531	-	1987	19.5228	75.5819	47.8798	69.0221	34.3406	99.5047	80.1323	20.9034	78.4271	142.544	155.545	98.3949	128.61	36.1401	74.7385	24.4044	49.1442	22.8409
MSTRG.27881.1	chr7	133317328	133329836	+	11319	12.5764	7.9567	13.1918	17.1913	10.1042	7.0488	7.6632	7.6494	16.9866	13.1423	13.6919	16.1703	14.9116	17.2201	11.3902	18.2298	17.6561	11.803
MSTRG.23803.6	chr5	79921989	79947772	-	1184	10294.7	11125.3	9730.19	8861.26	12404.8	7601.89	14595.1	16961.1	5062.17	7151.42	9623.35	9417.75	6844.72	10856.9	6154.47	9946.78	7856.64	12338.2
MSTRG.6020.1	chr11	120233324	120240640	+	779	42.2386	66.1495	59.1468	97.459	67.0244	90.3499	49.4876	19.6297	95.6371	70.2732	51.7335	55.7355	101.588	60.6466	94.1465	74.2192	78.8507	65.6455
MSTRG.2174.1	chr1	161420471	161428342	-	441	9.4247	56.8455	22.7339	57.5535	26.3099	45.6864	38.7002	34.6747	14.0166	117.387	83.3208	22.4026	28.9736	39.1784	22.199	13.8409	15.8729	17.3938
MSTRG.1965.8	chr1	153003678	153005376	+	548	888.644	9941.31	10807.3	4616.96	6798.48	11876.8	3617.44	440.435	14471.4	11477.1	17072.3	10220.2	10161.8	3913.49	8632.79	1863.82	5873.65	1088.7
MSTRG.19765.56	chr3	15771200	15780221	-	441	34868.1	24701.5	22554	23564.6	23030	18006.5	26747.7	38289.3	12239.5	20058.8	27972.3	23062.3	17144.4	27110.2	18286.7	26063.9	24200.7	19753.6
MSTRG.8553.1	chr13	114553159	114600134	+	1654	260.291	110.446	57.1325	79.6877	104.222	137.404	50.9855	44.4768	96.3804	45.8085	116.99	146.027	72.0181	132.044	85.2713	111.735	107.92	129.081
MSTRG.28981.1	chr8	98595640	98664787	-	2396	41.0539	31.4853	56.3549	56.6824	69.1789	43.3898	28.7435	19.5775	92.3316	44.4535	31.0425	46.5504	51.1776	50.4774	42.9363	70.6933	37.2494	34.1488
MSTRG.3282.1	chr10	20050363	20111541	+	1617	72.1843	43.7826	22.9538	159.305	107.461	67.4497	110.016	33.8653	113.474	97.1479	66.339	37.945	114.068	84.1446	154.538	67.1072	122.835	106.208
MSTRG.21348.1	chr3	178891878	178895660	+	375	59.1114	46.4239	72.2416	84.3067	125.235	26.5054	53.5428	40.2264	118.855	70.3458	64.7967	79.0362	77.4885	88.5481	59.2916	84.0971	108.733	64.2064
MSTRG.30284.3	chr9	111777546	111792803	-	4758	28.7538	21.0751	30.7549	25.2214	39.017	19.5916	20.8466	36.0907	38.0854	23.8863	29.8319	43.2766	31.5324	35.7455	19.5989	45.6839	33.1755	27.5411
MSTRG.11275.1	chr16	15198199	15457783	+	329	366.358	397.919	324.831	537.993	350.986	555.235	308.807	310.906	633.856	289.377	377.388	336.641	498.616	514.49	576.461	342.193	530.849	508.399
MSTRG.6934.21	chr12	52884939	52912957	+	595	14516.7	27236.8	38290.7	35889.4	43560.4	30479.1	11655.3	2146.65	55958.4	34205.8	39519.5	41845.3	45140.6	18001.8	23850.4	21167.9	41020.7	5443.6
MSTRG.25249.1	chr6	32489706	32552125	+	216	157.143	78.4477	152.083	232.948	89.5268	68.4026	918.408	21.0469	4.5185	3352.56	843.707	887.087	187.958	89.9879	62.9911	99.6895	9.7222	18.7427
MSTRG.26747.1	chr7	7624317	7668561	-	742	195.584	217.103	232.286	442.281	307.156	175.953	277.907	249.53	227.996	429.299	268.77	292.223	208.031	207.385	314.413	207.254	483.96	256.149
MSTRG.29605.9	chr9	9413154	9447133	-	219	123717	51442.5	53553	39528.4	85882.3	33462.9	39784.9	80852.8	36230.8	36911.8	60811.8	73007.9	35385.7	77255.3	29248.8	45328.1	34156	21561.4
MSTRG.9665.12	chr14	106090913	106235897	+	224	718609	13716.8	7742.08	899.509	6579.54	108396	15114.5	16537.8	4435.57	25001.9	86893.7	8037.56	12460	30356.5	9007.51	32595.3	24905.4	5369.66
MSTRG.19765.19	chr3	15685535	15780207	-	213	88776.1	63000.2	56118.1	61154.1	59585.3	43476.1	63965.8	103151	31396.9	45461.6	64800.9	64334.1	41092.5	67414.9	48543.6	63699.3	54596.5	42147.7
MSTRG.20465.6	chr3	96322973	96336853	-	372	11604.8	14355.2	12213.3	10826.2	9741.67	11575.2	12960.4	18963.3	4104.27	12295.7	11479.5	10672.1	8643.44	12526.5	8971.26	11351.2	11182.5	14865.9
MSTRG.9426.5	chr14	86000184	86087826	+	498	431.902	435.806	1041.72	672.841	2524.01	457.436	328.998	86.7234	3892.89	437.312	3106.67	4144.66	545.012	2733.79	589.744	3813.87	698.24	1422.64
MSTRG.28521.1	chr8	39775473	39860683	-	587	276.731	39.1479	938.282	265.88	163.305	69.1039	12.656	9.5048	52.0976	99.0028	65.1211	67.3222	115.156	292.499	12.4375	164.351	22.6575	15.6085
MSTRG.7245.2	chr12	69691244	69748010	-	549	1057.36	11634.7	1622.18	896.647	637.548	431.089	340.129	7009.28	135.111	814.328	276.355	190.847	1417.45	1176.24	200.081	466.341	385.381	208.417
MSTRG.29604.9	chr9	9389364	9466222	+	227	155396	70526.4	74342.5	88141.3	109279	45003	53646.9	104313	49915	47825.3	81812.2	95425.8	67876	96399.7	35697.2	65619.1	48428.5	25951.9
MSTRG.19765.22	chr3	15696288	15780208	-	227	83513	58964.4	52730.3	57351.1	55973.7	40851.6	60103	96684.9	29381.7	42606.3	60945.3	60290.8	38489.1	63283.3	45579.7	59691.5	51092.8	39267.6
MSTRG.19546.1	chr22	42960931	42961324	-	302	895.709	898.502	954.959	1104.36	1407.8	571.963	1127.59	1605.93	502.004	969.388	1166.66	1118.29	748.599	1700.24	631.295	1136.89	993.787	645.573
MSTRG.29604.12	chr9	9389373	9486072	+	214	164843	74821.6	80925	93909.8	115925	47754.4	56970.6	110679	52950.2	50733.3	86838.8	101266	72416.3	102575	37875.8	69611.6	51405.6	27536.4
MSTRG.10615.13	chr15	73920560	73925562	-	277	148.796	200.276	214.852	241.127	121.671	125.105	128.3	170.834	182.046	167.554	147.628	166.129	231.382	184.199	222.236	258.917	176.894	116.922
MSTRG.30936.7	chrX	45604639	45710447	-	2247	829.436	2277.6	2719.89	4549.72	881.505	2197.62	1277	304.951	2655.66	2816.88	1022.7	1829.4	2791.29	1697.28	3315.9	1311.89	2323.43	1917.38
MSTRG.7883.1	chr13	19342985	19362635	-	334	11.4069	10.4245	0.6387	69.3253	0	2.4129	70.3351	56.9194	0	7.72	1.7744	2.3352	3.7022	0.8083	4.9679	0	1.5718	33.1733
MSTRG.18263.1	chr20	21342585	21395470	-	778	467.002	477.963	506.959	463.311	432.846	526.913	302.211	173.707	494.69	456.088	407.925	351.551	467.271	624.942	542.358	543.957	329.304	242.927
MSTRG.9049.1	chr14	55675717	55696645	+	369	76.0294	64.1631	102.898	51.8892	132.512	39.3125	47.3397	36.9604	70.5329	62.8894	77.8961	96.5266	66.4615	114.131	56.2086	102.006	50.745	28.8719
MSTRG.23517.9	chr5	60079693	60140081	-	591	274.272	444.993	673.864	485.968	243.534	780.907	350.61	91.2583	324.232	522.204	513.432	1043.03	936.979	255.346	579.765	154.919	261.759	186.395
MSTRG.15704.20	chr2	20529175	20550463	-	3756	38.5455	37.7596	54.7478	65.7372	52.2941	43.8428	27.6909	24.3173	95.1054	48.7938	41.8139	68.2502	52.2898	54.5534	48.3294	46.4504	51.95	43.8516
MSTRG.29604.8	chr9	9389360	9463395	+	224	157467	71471	75337.2	89317.8	110737	45605.7	54364.5	105709	50582	48456.9	82907.9	96700.3	68786	97685.9	36172.3	66496.4	49073.2	26299.5
MSTRG.7202.2	chr12	66281469	66284082	-	1961	2.2961	7.8123	23.3871	12.3753	4.3671	5.7535	3.8908	0.1054	29.5305	0.4046	12.6932	11.9321	6.6208	32.0763	3.3846	16.4276	0.8924	0.2173
MSTRG.11338.1	chr16	22029953	22032099	+	1501	10.3838	10.3611	13.785	11.8663	11.963	12.8859	12.0391	6.1951	15.8223	13.3462	11.4503	18.187	10.5721	13.8489	14.813	6.8905	10.9593	8.8012
MSTRG.15184.1	chr19	44471118	44617298	-	852	267.897	210.324	288.171	297.116	277.875	164.902	187.353	294.441	353.208	237.919	198.246	459.556	250.351	386.568	224.353	475.02	434.006	357.625
MSTRG.13930.1	chr18	14153677	14227139	+	654	45.0157	78.7928	10.7634	1540.1	11.405	19.7164	274.775	432.875	6.9643	227.762	8.1558	14.3112	87.2874	20.6394	313.842	4.148	436.963	338.508
MSTRG.14973.10	chr19	36815892	36822609	-	1399	7.6748	17.9191	2.4396	56.3366	9.8733	8.8329	8.0372	12.9982	11.1623	44.9427	38.1263	5.761	11.4902	9.4555	19.3326	6.0597	45.4072	39.5992
MSTRG.29344.1	chr8	130853758	130945439	+	925	934.226	995.227	2024.04	1604.22	1590.63	972.607	544.617	319.905	2558.7	1280.33	807.609	1364.02	1296.01	1770.09	1172.26	1552.35	821.456	609.047
MSTRG.13982.1	chr18	21520509	21522690	-	1915	6.5111	2.4242	3.2303	3.1391	2.5966	3.507	4.823	1.9423	10.3631	2.2786	4.178	19.9573	3.1209	10.291	1.7329	61.7111	7.5848	3.1154
MSTRG.21805.18	chr4	16775535	16899507	-	12731	29.7359	54.3514	17.2915	39.5406	33.1132	33.2972	24.1933	4.3663	46.2535	27.2954	24.7656	23.2398	39.0773	59.926	69.0508	38.7552	56.262	169.475
MSTRG.1640.1	chr1	144693867	144969875	+	706	2343.55	1297.37	1167.78	1911.05	3091.62	2397.56	3588.54	2356.19	2641.37	1152.42	1140.81	1563.24	1896.52	2770.38	1041.4	2358.34	1525.67	2294.93
MSTRG.15527.1	chr19	58824744	58826120	-	1060	17.3178	17.7374	29.7832	24.3645	20.8494	13.6852	12.5017	15.0108	16.5736	17.589	16.4936	28.2062	18.8589	29.5432	25.3588	32.4705	21.2971	15.277
MSTRG.20467.1	chr3	96323213	96344087	+	248	19031.4	23804.4	19949.8	17853.5	16011.6	18417.8	21352.9	31219.6	6904.15	19768.8	18489.3	17533.4	14048.8	20512.9	14256.4	18199.3	17937.4	23986.3
MSTRG.29604.1	chr9	9346768	9457026	+	321	110801	50388	52914.6	62666.2	77840.9	32046.3	38431.4	74433.1	35891	34091.6	58400.3	68018.8	48332.1	69229.3	25449.5	47677	34565.3	18557.4
MSTRG.31377.1	chrX	125603677	125610140	-	209	2205.74	2938.7	2783.26	2131.6	3367.92	1543.69	4632.48	4443.3	1374.49	1730.05	2408.89	2006.51	2161.44	3080.69	1852.2	3071.38	2313.51	2818.9
MSTRG.7060.1	chr12	57760197	57786061	-	512	217.826	194.491	200.397	491.81	185.608	292.246	147.844	100.9	396.5	238.632	179.416	256.941	269.683	307.4	192.502	197.036	285.741	289.232
MSTRG.118.1	chr1	9986170	10040814	-	1290	63.3644	74.3142	119.554	125.3	135.772	59.9745	80.1586	87.9431	133.916	97.4805	112.558	129.591	113.747	121.379	82.1922	85.5639	120.871	96.1312
MSTRG.8989.16	chr14	50247124	50381526	+	1112	128796	54485.8	62230.5	55200.1	68517	51230.4	58454.4	105238	41966.2	58629.1	88195.7	62261.2	47386.9	81134.8	37954.4	68431.4	54067.2	29629.8
MSTRG.464.2	chr1	28833890	28835311	-	231	3997.34	4141.97	5836.99	5334.71	7287.85	3201.53	3644.56	4776.03	2242.12	4602.26	5323.61	6784.44	3779.14	6948.94	2456.59	6528.8	5351.49	1365.15
MSTRG.5714.1	chr11	94539857	94548184	-	2986	16.4711	34.5925	28.3606	52.8642	29.2352	38.685	46.6662	16.6089	49.9004	34.275	45.352	77.7525	37.5456	32.0955	64.2373	44.9144	35.1053	32.9673
MSTRG.8945.13	chr14	49965538	50071028	-	331	487921	251883	291925	184857	280976	159536	173731	336512	179935	183654	304704	290521	187579	348682	148126	288136	244282	80682.5
MSTRG.4397.1	chr10	121326930	121334071	-	1126	35.6814	30.5095	32.7735	58.9227	50.7856	31.7305	37.8033	38.3554	47.0953	41.7473	44.7384	29.7854	47.9526	45.0739	37.8716	45.4745	52.0646	44.6586
MSTRG.23804.4	chr5	79881414	79948279	+	968	12606.9	13638.4	11963.5	10874	15193.7	9308.17	20416.7	20762.4	6207.21	8765.43	11824.6	11535.1	8765.49	13347	7538.23	12195.4	9628.57	15523
MSTRG.9033.1	chr14	55046145	55095943	-	1062	692.712	443.475	177.157	163.941	180.788	319.732	428.418	242.639	218.42	113.366	124.167	184.341	210.55	293.605	358.26	277.954	71.3509	305.768
MSTRG.21393.1	chr3	182572273	182646613	-	327	2870.41	5297.57	7803.17	6563.48	7120.94	5816.33	5844.27	2911.95	8736.24	11007.8	6160.32	7406.07	7084.46	5067.39	9169.17	4141.81	4838.97	2786.91
MSTRG.20380.1	chr3	71147168	71229295	+	367	834.275	803.247	579.488	1311.58	334.215	600.953	535.063	775.331	994.615	1071.16	615.261	406.629	888.362	1260.81	725.2	642.629	832.557	870.876
MSTRG.19765.10	chr3	15663152	15780208	-	228	83578.2	59097.8	52813.4	57450.2	56210.5	40888	60081.6	96792.9	29689.5	42823.9	60941.8	60387.8	38698.2	63403.6	45594.5	59965.1	51538	39636.5
MSTRG.23360.1	chr5	39412115	39451336	+	1497	57.1476	82.49	41.1805	75.106	109.431	51.502	40.9082	27.4695	57.808	36.8333	37.8078	35.9502	48.7339	89.8076	113.168	102.047	72.5948	147.601
MSTRG.27859.1	chr7	130700276	130716767	-	4676	57.405	27.0045	10.7203	18.1408	11.0478	43.3747	26.7514	18.1188	14.6108	11.6224	11.1534	9.9525	25.254	21.6502	22.8169	14.2501	10.8158	27.3862
MSTRG.25584.1	chr6	66968938	66988966	+	4934	2.5973	1.4584	0.4756	1.083	2.8555	4.1379	0.0814	0	35.2763	0.0402	68.7064	84.2035	24.0587	31.4064	2.6567	1.2715	0.0355	0.1296
MSTRG.29415.1	chr8	144526313	144536873	-	446	25.6272	28.1041	32.5229	30.9501	18.5821	40.9579	19.3583	9.2665	47.414	52.0318	27.9052	39.0564	31.4213	33.2915	68.8266	42.5777	18.4416	10.5104
MSTRG.18906.1	chr21	36302559	36310758	-	6967	25.006	4.098	9.0015	4.9533	22.9584	9.254	0.5764	1.3644	30.3993	5.039	6.5075	6.8663	9.3178	30.3792	2.4531	18.6902	4.044	4.4958
MSTRG.8945.37	chr14	50041170	50119035	-	1027	107981	48708.4	57823.1	44471.2	69921.6	41578.1	43141.1	82525.7	35456.9	47232.6	77196.9	56803.9	44728.6	90065.7	33973.7	61332.7	49108.8	21617.2
MSTRG.12510.8	chr17	18966762	19093549	-	679	1250.76	959.928	1472.45	1119.76	1221.38	1163.56	1416.14	1148.55	912.274	1369.71	1887.06	1078.24	1507.25	1900.88	1134.13	1266.01	1200.77	1009.83
MSTRG.10577.1	chr15	71832495	71862807	+	568	59.1488	154.474	115.294	375.511	73.4408	307.891	434.446	138.974	100.807	1321.01	102.775	250.375	430.314	168.252	414.528	157.909	693.219	363.502
MSTRG.8989.63	chr14	50298077	50379440	+	499	264453	106195	121556	114632	146320	104014	119239	212054	79672.1	129014	165142	130046	100473	163249	78951.4	137285	118532	64570.5
MSTRG.11093.1	chr16	3083346	3092490	-	278	9.9671	121.904	154.229	163.377	86.4537	171.038	98.9483	121.161	83.0887	230.45	209.987	153.374	113.422	60.2078	155.184	21.3463	180.035	62.0828
MSTRG.9668.1	chr14	106054423	106174998	+	306	256262	7100.88	1429.05	564.606	1851.63	63790.5	2610.87	8068.5	1388.51	8554.05	24180.6	2075.65	4346.67	9935.73	2760.04	2717.24	9643.26	1543.05
MSTRG.30382.1	chr9	124118481	124123383	+	3914	4.3361	14.8855	6.976	10.8078	7.2698	9.6775	19.9041	2.587	7.3977	9.375	7.5709	5.4469	11.2679	12.4153	17.4237	8.5338	8.4951	30.377

## Sheet: Table S3 OSF-vs-Normal.lncRNA
GeneID	baseMean	log2Fold	lfcSE	stat	pvalue	qvalue	Type	Diff
AC005304.1	32.8505	-2.0589	0.419955	-4.90266	9.45e-07	0.00037844	lincRNA	Down
AC007551.3	73.3542	-1.15844	0.282019	-4.10768	4e-05	0.00501988	lincRNA	Down
AC012370.3	8.50087	-2.18295	0.543422	-4.01705	5.89e-05	0.00656564	lincRNA	Down
AC012593.1	88.1623	-2.74854	0.46497	-5.91121	3.4e-09	5.1e-06	lincRNA	Down
AC017048.1	25.7779	-2.60744	0.628968	-4.14559	3.39e-05	0.00450226	lincRNA	Down
AC020601.1	23.2481	-2.77053	0.636467	-4.35299	1.34e-05	0.00232921	lincRNA	Down
AC026150.8	132.908	-1.52345	0.366285	-4.15918	3.19e-05	0.00442031	lincRNA	Down
AC133680.1	113.779	-2.03549	0.481334	-4.22886	2.35e-05	0.00357921	lincRNA	Down
LINC00277	13.1116	-2.23262	0.466509	-4.78581	1.7e-06	0.000538158	lincRNA	Down
LINC00407	13.0296	-1.81142	0.430794	-4.20485	2.61e-05	0.00380723	lincRNA	Down
LINC00498	9.97238	-2.5395	0.652044	-3.89468	9.83e-05	0.00955289	lincRNA	Down
LINC00499	142.604	-3.61266	0.619051	-5.83581	5.35e-09	7.02e-06	lincRNA	Down
LINC00883	232.85	-1.06583	0.274644	-3.88079	0.000104119	0.00998612	lincRNA	Down
LINC00887	47.1489	2.54909	0.569768	4.47391	7.68e-06	0.00161231	lincRNA	Up
LINC01011	34.2202	-1.66679	0.347548	-4.79584	1.62e-06	0.00052859	lincRNA	Down
RP1-34H18.1	1614.87	-2.22322	0.514488	-4.32122	1.55e-05	0.00261772	lincRNA	Down
RP1-93H18.1	536.673	-1.32804	0.330942	-4.0129	6e-05	0.00661949	lincRNA	Down
RP11-1000B6.3	648.585	-1.23332	0.294314	-4.19047	2.78e-05	0.00392541	lincRNA	Down
RP11-1082L8.3	23.4354	-1.64022	0.401616	-4.08406	4.43e-05	0.00535195	lincRNA	Down
RP11-108M12.3	15.6469	-1.87123	0.459282	-4.07426	4.62e-05	0.00549911	lincRNA	Down
RP11-111F5.3	51.4315	-2.5039	0.60393	-4.14602	3.38e-05	0.00450226	lincRNA	Down
RP11-114G22.1	1191.19	-3.99846	0.482327	-8.28994	1.13e-16	2.25e-12	lincRNA	Down
RP11-114H21.2	11.015	-2.20402	0.454587	-4.8484	1.24e-06	0.000453094	lincRNA	Down
RP11-134O21.1	26.3389	-2.02104	0.489775	-4.12647	3.68e-05	0.00480803	lincRNA	Down
RP11-13N12.2	75.4108	-2.44281	0.612885	-3.98576	6.73e-05	0.0072898	lincRNA	Down
RP11-153K16.1	250.626	-3.65327	0.575159	-6.35176	2.13e-10	5.81e-07	lincRNA	Down
RP11-153K16.2	26.8223	-3.34879	0.594141	-5.63636	1.74e-08	1.8e-05	lincRNA	Down
RP11-172F10.1	170.894	-2.60034	0.541434	-4.80269	1.57e-06	0.00052799	lincRNA	Down
RP11-254I22.2	369.46	-1.76838	0.40004	-4.42051	9.85e-06	0.00191951	lincRNA	Down
RP11-258C19.5	1249.4	-1.21448	0.250558	-4.84711	1.25e-06	0.000453094	lincRNA	Down
RP11-276H19.1	253.69	-1.83177	0.34499	-5.30962	1.1e-07	8.24e-05	lincRNA	Down
RP11-285B24.1	44.324	-4.31785	0.65821	-6.55998	5.38e-11	1.8e-07	lincRNA	Down
RP11-2A4.3	8.07969	-3.86422	0.629592	-6.13765	8.37e-10	1.57e-06	lincRNA	Down
RP11-314N14.1	22.5502	-2.54897	0.574746	-4.43495	9.21e-06	0.00184307	lincRNA	Down
RP11-345M22.3	10.4302	-2.82736	0.552212	-5.12006	3.05e-07	0.000179794	lincRNA	Down
RP11-348J24.2	456.238	-2.70064	0.588808	-4.58662	4.5e-06	0.00110848	lincRNA	Down
RP11-373D23.3	18.23	-2.02116	0.481489	-4.19772	2.7e-05	0.00387262	lincRNA	Down
RP11-378A12.1	5.94491	-2.58505	0.646459	-3.99878	6.37e-05	0.00695047	lincRNA	Down
RP11-380D23.2	92.0315	-4.64553	0.58943	-7.88138	3.24e-15	3.24e-11	lincRNA	Down
RP11-400N13.1	103.353	-1.19751	0.253389	-4.72598	2.29e-06	0.000680679	lincRNA	Down
RP11-427M20.1	99.404	-1.41265	0.26534	-5.32394	1.02e-07	8.02e-05	lincRNA	Down
RP11-446H18.5	98.7157	-1.14839	0.259895	-4.41866	9.93e-06	0.00192348	lincRNA	Down
RP11-466L17.1	205.853	-2.74714	0.56243	-4.88442	1.04e-06	0.000398167	lincRNA	Down
RP11-536N17.1	26.089	2.87424	0.669664	4.29207	1.77e-05	0.00287862	lincRNA	Up
RP11-682N22.1	238.357	-1.46518	0.266897	-5.48969	4.03e-08	3.66e-05	lincRNA	Down
RP11-707A18.1	118.397	-3.59868	0.650208	-5.53466	3.12e-08	3.02e-05	lincRNA	Down
RP11-719N22.2	115.983	-3.4674	0.67869	-5.10895	3.24e-07	0.00018349	lincRNA	Down
RP11-764K9.1	40.4954	-1.77203	0.419944	-4.21967	2.45e-05	0.00366204	lincRNA	Down
RP11-790J24.1	12.6495	-2.55495	0.643958	-3.96758	7.26e-05	0.00767487	lincRNA	Down
RP11-90C4.1	30.1623	-2.91613	0.618459	-4.71516	2.42e-06	0.000701479	lincRNA	Down
RP4-734C18.1	87.8427	-3.12763	0.640734	-4.88133	1.05e-06	0.000398167	lincRNA	Down
MSTRG.18150.1	24.5944	-2.84675	0.676038	-4.21094	2.54e-05	0.0037241	lincRNA	Down
MSTRG.20327.1	97.824	-2.28077	0.483838	-4.7139	2.43e-06	0.000701479	lincRNA	Down
MSTRG.21801.1	536.903	-1.72332	0.34478	-4.99833	5.78e-07	0.000271719	lincRNA	Down
MSTRG.23995.1	242.224	-1.96534	0.431951	-4.54991	5.37e-06	0.00123936	lincRNA	Down
MSTRG.264.10	1422.82	2.48212	0.498543	4.97875	6.4e-07	0.000283951	lincRNA	Up
MSTRG.27805.1	82.4844	-1.33526	0.329339	-4.05437	5.03e-05	0.00580428	lincRNA	Down
MSTRG.2972.1	45.9476	2.90549	0.628554	4.6225	3.79e-06	0.000980797	lincRNA	Up
MSTRG.29945.1	350.656	-1.46394	0.32471	-4.50845	6.53e-06	0.00143097	lincRNA	Down
MSTRG.30806.1	101.68	1.22617	0.257703	4.75807	1.95e-06	0.000598713	lincRNA	Up
MSTRG.8515.1	2674.94	3.69659	0.600537	6.15548	7.49e-10	1.57e-06	lincRNA	Up

## Sheet: Table S3-OSCC-vs-OSF.lncRNA
GeneID	baseMean	log2Fold	lfcSE	stat	pvalue	qvalue	Type	Diff
AC007064.24	3.0105	-2.2129	0.577342	-3.83291	0.000126639	0.00401509	lincRNA	Down
AC007091.1	41.9784	-1.42031	0.356814	-3.98053	6.88e-05	0.00266107	lincRNA	Down
AC007163.3	20.7219	2.24973	0.537651	4.18438	2.86e-05	0.00146532	lincRNA	Up
AC009502.4	63.6358	1.98835	0.321335	6.18777	6.1e-10	4.68e-07	lincRNA	Up
AC011891.5	10.6217	-2.46787	0.581573	-4.24344	2.2e-05	0.00121256	lincRNA	Down
AC017048.3	57.2185	1.58833	0.41684	3.81041	0.000138736	0.00427559	lincRNA	Up
AC019186.1	128.352	1.14964	0.269186	4.2708	1.95e-05	0.00110576	lincRNA	Up
AC069277.2	896.346	2.13125	0.599437	3.55541	0.00037739	0.0086454	lincRNA	Up
AC079630.2	10.8782	-2.45585	0.581339	-4.22447	2.4e-05	0.00128913	lincRNA	Down
AC090044.1	283.449	-1.8441	0.421069	-4.37957	1.19e-05	0.00077782	lincRNA	Down
AC092684.1	88.1572	-1.53893	0.397344	-3.87305	0.000107481	0.00353485	lincRNA	Down
AC093159.1	23.3792	-2.81921	0.576218	-4.89261	9.95e-07	0.000118924	lincRNA	Down
AC093381.2	106.156	-1.27867	0.330807	-3.8653	0.000110955	0.00361202	lincRNA	Down
AC097499.1	26.3365	-2.59364	0.511185	-5.07378	3.9e-07	6.14e-05	lincRNA	Down
AC107399.2	11.9034	2.63041	0.562323	4.67776	2.9e-06	0.0002734	lincRNA	Up
AC108066.1	45.6854	-1.21535	0.322924	-3.76359	0.000167491	0.00493306	lincRNA	Down
AF015720.3	25.5687	-2.23823	0.579929	-3.8595	0.000113622	0.00368862	lincRNA	Down
AP000654.4	45.5586	1.35094	0.385175	3.50733	0.000452626	0.00987261	lincRNA	Up
CASC14	108.643	1.27215	0.347639	3.65941	0.0002528	0.00651513	lincRNA	Up
CNTN4-AS2	74.1883	-1.76015	0.427641	-4.11597	3.86e-05	0.00179771	lincRNA	Down
CTA-384D8.34	46.6921	1.57333	0.444449	3.53996	0.000400185	0.00905578	lincRNA	Up
CTA-384D8.35	76.6962	1.66775	0.457906	3.64212	0.000270401	0.00685671	lincRNA	Up
CTB-151G24.1	58.294	1.0285	0.249383	4.1242	3.72e-05	0.00175116	lincRNA	Up
CTB-27N1.1	2.16041	-2.37386	0.63962	-3.71136	0.000206146	0.00561227	lincRNA	Down
CTC-458G6.2	36.8426	2.08112	0.556993	3.73635	0.000186713	0.0052916	lincRNA	Up
CTC-513N18.7	382.726	-1.06248	0.287288	-3.69832	0.000217034	0.0058455	lincRNA	Down
CTC-527H23.3	1.7639	2.22639	0.611866	3.63869	0.000274023	0.00692542	lincRNA	Up
CTC-529L17.1	3.88429	-2.03582	0.553593	-3.67746	0.000235566	0.0062101	lincRNA	Down
CTD-2037L6.2	10.3665	2.2997	0.623803	3.68657	0.000227294	0.00604443	lincRNA	Up
CTD-2066L21.1	190.504	2.7997	0.548409	5.10514	3.31e-07	5.52e-05	lincRNA	Up
CTD-2066L21.2	66.3306	2.99065	0.53447	5.59555	2.2e-08	6.99e-06	lincRNA	Up
CTD-2066L21.3	1038.13	1.87089	0.338655	5.52449	3.3e-08	9.79e-06	lincRNA	Up
CTD-2086O20.3	6.10159	-1.97264	0.428083	-4.60809	4.06e-06	0.0003529	lincRNA	Down
CTD-2091N23.1	21.407	2.38632	0.450289	5.29952	1.16e-07	2.45e-05	lincRNA	Up
CTD-2128A3.2	34.5193	1.44806	0.392305	3.69115	0.000223246	0.00596271	lincRNA	Up
CTD-2171N6.1	10.7463	2.0457	0.55041	3.71669	0.000201852	0.00555543	lincRNA	Up
CTD-2184D3.3	14.5462	1.76249	0.480938	3.66469	0.000247642	0.0064244	lincRNA	Up
CTD-2215E18.3	21.6896	1.52604	0.410104	3.7211	0.000198356	0.00551082	lincRNA	Up
CTD-2218G20.2	41.7055	2.7252	0.567381	4.80313	1.56e-06	0.000167904	lincRNA	Up
CTD-2227C6.3	3.86729	2.14085	0.575433	3.72042	0.000198889	0.00551451	lincRNA	Up
CTD-2231E14.5	1.79157	-2.58212	0.613917	-4.20598	2.6e-05	0.00136225	lincRNA	Down
CTD-2235C13.3	7.72176	-1.51321	0.416228	-3.63554	0.000277402	0.00699113	lincRNA	Down
CTD-2331D11.4	8.92365	2.62155	0.645219	4.06304	4.84e-05	0.00208376	lincRNA	Up
CTD-2332E11.2	3.94965	-1.80443	0.507087	-3.55841	0.000373105	0.00860261	lincRNA	Down
CTD-2507G9.1	6.08439	-1.63731	0.434782	-3.7658	0.000166014	0.00490199	lincRNA	Down
CTD-2515H24.4	3.69782	-2.32276	0.59842	-3.88148	0.000103821	0.00347608	lincRNA	Down
CTD-2544M6.1	41.2722	1.83653	0.311066	5.90401	3.55e-09	1.67e-06	lincRNA	Up
CTD-2544M6.2	20.8929	1.95988	0.418962	4.67793	2.9e-06	0.0002734	lincRNA	Up
CTD-2547L24.4	20.2519	1.47188	0.363709	4.04687	5.19e-05	0.00218383	lincRNA	Up
CTD-2562J17.4	8.6807	-1.56492	0.389717	-4.01553	5.93e-05	0.00240373	lincRNA	Down
CTD-2626G11.2	3.64691	-2.56846	0.633238	-4.05607	4.99e-05	0.00211981	lincRNA	Down
CTD-3179P9.1	974.105	-1.61447	0.388512	-4.15553	3.25e-05	0.00160585	lincRNA	Down
CYP4F35P	27.0845	-3.41934	0.568334	-6.01642	1.78e-09	1.01e-06	lincRNA	Down
CYP4F59P	18.5239	-2.48486	0.545939	-4.55153	5.33e-06	0.000428688	lincRNA	Down
FAM66E	53.5791	-1.19464	0.313737	-3.80777	0.000140224	0.00430639	lincRNA	Down
FGF14-IT1	104.223	-2.74286	0.432693	-6.33904	2.31e-10	2.31e-07	lincRNA	Down
GS1-122H1.2	64.3753	-1.55595	0.311821	-4.98989	6.04e-07	8.07e-05	lincRNA	Down
GS1-204I12.1	80.9949	-2.46488	0.54546	-4.5189	6.22e-06	0.000479551	lincRNA	Down
GS1-279B7.1	43.2289	1.42658	0.343385	4.15445	3.26e-05	0.00161009	lincRNA	Up
HCG22	47.9533	-2.16244	0.569488	-3.79717	0.000146355	0.0044367	lincRNA	Down
KB-7G2.8	3.81237	-1.94902	0.497239	-3.91969	8.87e-05	0.00316193	lincRNA	Down
LINC00269	6.10093	2.7532	0.617057	4.46183	8.13e-06	0.000576902	lincRNA	Up
LINC00324	22.822	-1.01577	0.272087	-3.73324	0.000189029	0.00532015	lincRNA	Down
LINC00341	60.986	-1.23162	0.295431	-4.1689	3.06e-05	0.00153497	lincRNA	Down
LINC00382	62.768	1.49512	0.39775	3.75896	0.000170624	0.00500041	lincRNA	Up
LINC00460	10.9103	3.07731	0.586374	5.24803	1.54e-07	3.05e-05	lincRNA	Up
LINC00492	278.808	1.95897	0.550695	3.55727	0.00037473	0.00861243	lincRNA	Up
LINC00551	40.6012	-2.54253	0.57315	-4.43605	9.16e-06	0.000638389	lincRNA	Down
LINC00568	6.64431	-1.74743	0.475499	-3.67494	0.000237907	0.00625478	lincRNA	Down
LINC00639	95.6585	-1.16417	0.279166	-4.17017	3.04e-05	0.00153387	lincRNA	Down
LINC00704	121.065	2.2764	0.515402	4.41675	1e-05	0.000678019	lincRNA	Up
LINC00705	22.6318	2.27356	0.567153	4.00873	6.1e-05	0.00244852	lincRNA	Up
LINC00911	8.36357	2.38994	0.461453	5.17917	2.23e-07	3.89e-05	lincRNA	Up
LINC00936	20.8122	-1.15852	0.322721	-3.58987	0.000330846	0.00783893	lincRNA	Down
LINC00941	13.2009	1.72903	0.462687	3.73692	0.000186287	0.00528966	lincRNA	Up
LINC00958	1035.49	1.18113	0.334139	3.53483	0.000408031	0.00914749	lincRNA	Up
LINC00964	218.856	1.61084	0.374718	4.29879	1.72e-05	0.000997447	lincRNA	Up
LINC00968	78.3758	-1.4526	0.352203	-4.12435	3.72e-05	0.00175116	lincRNA	Down
LLNLR-249E10.1	3.89046	-2.24583	0.509839	-4.40498	1.06e-05	0.000707227	lincRNA	Down
RAMP2-AS1	22.8519	-2.01485	0.512675	-3.93007	8.49e-05	0.00306137	lincRNA	Down
RERG-AS1	10.0917	-1.89934	0.421115	-4.51026	6.47e-06	0.000490928	lincRNA	Down
RP1-193H18.3	58.0881	-1.26916	0.35669	-3.55816	0.000373459	0.00860261	lincRNA	Down
RP1-251M9.2	28.7251	-2.29004	0.475615	-4.81491	1.47e-06	0.000161241	lincRNA	Down
RP1-309H15.2	6.55508	3.0196	0.622409	4.85147	1.23e-06	0.000139825	lincRNA	Up
RP1-34H18.1	530.802	-1.36405	0.3634	-3.75359	0.000174318	0.00506107	lincRNA	Down
RP11-1082L8.3	29.6943	1.40162	0.342416	4.09334	4.25e-05	0.00192021	lincRNA	Up
RP11-108K3.2	42.6703	1.65371	0.429069	3.85419	0.000116112	0.00376255	lincRNA	Up
RP11-108M12.3	26.6306	1.94741	0.443935	4.38671	1.15e-05	0.000756297	lincRNA	Up
RP11-114F10.2	18.3935	1.65015	0.452989	3.64281	0.000269681	0.00684512	lincRNA	Up
RP11-114J13.1	51.6277	-1.01323	0.185827	-5.45257	4.96e-08	1.3e-05	lincRNA	Down
RP11-118A3.1	4.3198	2.14247	0.577103	3.71246	0.000205257	0.00560443	lincRNA	Up
RP11-133F8.2	32.0872	-1.9535	0.421003	-4.6401	3.48e-06	0.000316438	lincRNA	Down
RP11-136K7.2	70.8929	-2.04936	0.559557	-3.66246	0.000249802	0.00646625	lincRNA	Down
RP11-138I17.1	103.777	-1.79676	0.446709	-4.02222	5.77e-05	0.0023583	lincRNA	Down
RP11-164N3.2	448.179	1.27532	0.334019	3.81809	0.000134489	0.00418495	lincRNA	Up
RP11-172F10.1	40.7034	-1.91211	0.379823	-5.0342	4.8e-07	7.05e-05	lincRNA	Down
RP11-180P8.1	14.7738	1.27289	0.281967	4.51434	6.35e-06	0.000485736	lincRNA	Up
RP11-217E22.5	460.939	-3.06591	0.570387	-5.37514	7.65e-08	1.81e-05	lincRNA	Down
RP11-218E20.3	7.92909	1.83713	0.445326	4.12535	3.7e-05	0.00174705	lincRNA	Up
RP11-221N13.3	27.3626	2.18968	0.472461	4.63463	3.58e-06	0.000322417	lincRNA	Up
RP11-230G5.2	106.23	1.42011	0.303093	4.68539	2.79e-06	0.000269272	lincRNA	Up
RP11-24I21.1	27.7809	1.74069	0.471115	3.69484	0.000220029	0.00589911	lincRNA	Up
RP11-250B2.3	83.3404	-1.22971	0.306407	-4.01333	5.99e-05	0.00241584	lincRNA	Down
RP11-254F7.2	10.0412	-1.35659	0.343752	-3.94642	7.93e-05	0.00293777	lincRNA	Down
RP11-25I15.3	130.156	2.91919	0.483613	6.03622	1.58e-09	9.59e-07	lincRNA	Up
RP11-274B18.4	30.7213	-1.55971	0.422227	-3.69401	0.000220744	0.0059093	lincRNA	Down
RP11-276H19.1	109.32	-1.30396	0.285931	-4.56041	5.11e-06	0.000416664	lincRNA	Down
RP11-27M24.3	124.24	-1.30959	0.349433	-3.74775	0.000178425	0.00513515	lincRNA	Down
RP11-290F20.2	28.2631	1.20995	0.29602	4.08738	4.36e-05	0.00194943	lincRNA	Up
RP11-292E2.4	68.7222	-1.98794	0.487716	-4.07602	4.58e-05	0.00202154	lincRNA	Down
RP11-297H3.3	21.8635	1.91548	0.445782	4.2969	1.73e-05	0.00100272	lincRNA	Up
RP11-307P5.1	1018.68	-1.32772	0.372716	-3.56229	0.000367641	0.00851613	lincRNA	Down
RP11-308N19.1	605.147	2.04401	0.49588	4.12199	3.76e-05	0.00176339	lincRNA	Up
RP11-314N14.1	261.252	3.98914	0.590446	6.75616	1.42e-11	2.94e-08	lincRNA	Up
RP11-314P15.2	82.7711	-2.16998	0.413699	-5.24532	1.56e-07	3.05e-05	lincRNA	Down
RP11-323C15.2	3.09414	-1.99163	0.535592	-3.71855	0.000200369	0.00553188	lincRNA	Down
RP11-338L18.1	18.7891	2.02411	0.470265	4.30419	1.68e-05	0.000981533	lincRNA	Up
RP11-340B18.1	115.791	3.25092	0.538832	6.03327	1.61e-09	9.6e-07	lincRNA	Up
RP11-346D19.1	49.3628	1.48066	0.357832	4.13786	3.51e-05	0.00167245	lincRNA	Up
RP11-351J23.1	128.349	-2.65864	0.507276	-5.24102	1.6e-07	3.09e-05	lincRNA	Down
RP11-351J23.2	10.4184	-2.21069	0.49926	-4.42792	9.51e-06	0.000652607	lincRNA	Down
RP11-364P22.2	111.419	2.53732	0.486017	5.22064	1.78e-07	3.27e-05	lincRNA	Up
RP11-366H4.1	6.3065	2.83851	0.618159	4.59187	4.39e-06	0.000371402	lincRNA	Up
RP11-367F23.1	6.24747	2.08481	0.580062	3.59412	0.000325487	0.00774839	lincRNA	Up
RP11-367F23.2	11.1526	2.11659	0.472265	4.48177	7.4e-06	0.000539222	lincRNA	Up
RP11-369C8.1	5.22185	-2.32131	0.583854	-3.97584	7.01e-05	0.00270521	lincRNA	Down
RP11-379I19.1	12.0365	2.4252	0.561122	4.32206	1.55e-05	0.000925265	lincRNA	Up
RP11-380J14.1	7.95332	1.95305	0.492032	3.96936	7.21e-05	0.00274978	lincRNA	Up
RP11-384F7.2	273.618	-2.79706	0.470208	-5.94857	2.71e-09	1.37e-06	lincRNA	Down
RP11-394I13.1	5.95136	1.71595	0.447018	3.83865	0.00012371	0.00394351	lincRNA	Up
RP11-397A16.1	468.593	2.06026	0.582343	3.53789	0.000403345	0.00909754	lincRNA	Up
RP11-398G24.2	282.021	1.2428	0.309988	4.0092	6.09e-05	0.00244646	lincRNA	Up
RP11-426L16.8	7.59963	1.42811	0.358173	3.98721	6.69e-05	0.00261712	lincRNA	Up
RP11-42I10.1	71.1737	1.62628	0.346384	4.69501	2.67e-06	0.000258921	lincRNA	Up
RP11-430B1.2	120.493	-1.49281	0.393455	-3.79411	0.000148176	0.00447268	lincRNA	Down
RP11-466L17.1	46.1354	-1.59396	0.379528	-4.19986	2.67e-05	0.00138678	lincRNA	Down
RP11-473L15.3	31.97	-2.62753	0.467817	-5.61657	1.95e-08	6.42e-06	lincRNA	Down
RP11-475O6.1	634.609	-1.79681	0.361158	-4.97515	6.52e-07	8.64e-05	lincRNA	Down
RP11-481E4.2	2.05188	-2.30816	0.617966	-3.73509	0.000187649	0.00530311	lincRNA	Down
RP11-486P11.1	121.044	-1.61163	0.351631	-4.5833	4.58e-06	0.000385111	lincRNA	Down
RP11-497E19.1	20.8814	1.70982	0.435264	3.92824	8.56e-05	0.00307527	lincRNA	Up
RP11-507B12.1	56.9607	-3.12738	0.622597	-5.02313	5.08e-07	7.26e-05	lincRNA	Down
RP11-510I5.4	23.2134	1.21701	0.29588	4.11317	3.9e-05	0.00180626	lincRNA	Up
RP11-515E23.1	40.845	1.41683	0.369985	3.82942	0.000128445	0.00405412	lincRNA	Up
RP11-523G9.3	8.70644	-2.03262	0.518812	-3.91785	8.93e-05	0.00316893	lincRNA	Down
RP11-523L1.2	5.59847	-1.53666	0.422699	-3.63534	0.000277615	0.00699113	lincRNA	Down
RP11-524C21.2	2.4467	2.00746	0.5648	3.55428	0.000379018	0.00867142	lincRNA	Up
RP11-526A4.1	261.676	1.96508	0.464716	4.22857	2.35e-05	0.00127367	lincRNA	Up
RP11-53M11.3	18.5816	2.00361	0.54751	3.65949	0.000252713	0.00651513	lincRNA	Up
RP11-541G9.1	17.6447	-1.74651	0.45418	-3.84541	0.000120349	0.00386681	lincRNA	Down
RP11-542B15.1	45.858	1.68024	0.426713	3.93764	8.23e-05	0.00299704	lincRNA	Up
RP11-553L6.5	375.971	-1.29377	0.310472	-4.1671	3.09e-05	0.00154279	lincRNA	Down
RP11-572C15.6	393.823	-1.46317	0.37307	-3.92196	8.78e-05	0.00313957	lincRNA	Down
RP11-608O21.1	814.564	-2.69228	0.517994	-5.1975	2.02e-07	3.61e-05	lincRNA	Down
RP11-624A4.1	15.7407	3.20889	0.535246	5.99517	2.03e-09	1.12e-06	lincRNA	Up
RP11-631F7.2	12.7943	-1.66352	0.409522	-4.06212	4.86e-05	0.0020883	lincRNA	Down
RP11-636O21.1	8.2894	-1.85661	0.474327	-3.9142	9.07e-05	0.0032043	lincRNA	Down
RP11-643A5.2	3.69804	-2.60934	0.579504	-4.50272	6.71e-06	0.000503249	lincRNA	Down
RP11-647P12.1	3.08382	-2.6636	0.577632	-4.61124	4e-06	0.000348448	lincRNA	Down
RP11-650P15.1	13.9246	-2.27999	0.584328	-3.9019	9.54e-05	0.00332495	lincRNA	Down
RP11-65J21.3	181.188	1.41797	0.298058	4.75735	1.96e-06	0.000204603	lincRNA	Up
RP11-65J3.1	67.6645	1.29509	0.297232	4.35719	1.32e-05	0.000830917	lincRNA	Up
RP11-65M17.1	6.80118	1.71367	0.48203	3.55512	0.000377808	0.00864935	lincRNA	Up
RP11-66B24.1	9.56597	-2.43364	0.562794	-4.32421	1.53e-05	0.000920966	lincRNA	Down
RP11-6J21.2	137.654	-1.20862	0.321979	-3.75373	0.000174224	0.00506107	lincRNA	Down
RP11-707A18.1	10.4347	-1.8779	0.498628	-3.76614	0.000165792	0.00489956	lincRNA	Down
RP11-707F2.1	26.4327	2.11981	0.491823	4.31011	1.63e-05	0.000966847	lincRNA	Up
RP11-714L20.1	21.5475	-1.4062	0.378536	-3.71484	0.000203333	0.00558311	lincRNA	Down
RP11-71H9.2	7.94893	-2.31533	0.427694	-5.41353	6.18e-08	1.53e-05	lincRNA	Down
RP11-733O18.1	146.961	2.24698	0.463595	4.84686	1.25e-06	0.000142191	lincRNA	Up
RP11-757O6.1	41.36	-3.39544	0.548599	-6.1893	6.04e-10	4.68e-07	lincRNA	Down
RP11-765K14.1	9.01515	2.58338	0.608947	4.24238	2.21e-05	0.00121643	lincRNA	Up
RP11-768G7.2	19.005	-2.90256	0.572158	-5.07301	3.92e-07	6.14e-05	lincRNA	Down
RP11-770G2.2	80.3846	-1.31607	0.373864	-3.52018	0.000431254	0.00955644	lincRNA	Down
RP11-774O3.3	49.2835	-1.02092	0.258751	-3.94556	7.96e-05	0.00294099	lincRNA	Down
RP11-78O7.2	12.4334	-1.21944	0.311821	-3.91072	9.2e-05	0.00323139	lincRNA	Down
RP11-792D21.2	174.733	1.21039	0.274978	4.4018	1.07e-05	0.00071416	lincRNA	Up
RP11-810P8.1	27.2114	1.50815	0.40789	3.69744	0.000217789	0.00586134	lincRNA	Up
RP11-844P9.1	1.80954	-2.12172	0.588164	-3.60736	0.000309333	0.00747487	lincRNA	Down
RP11-85M11.2	1436.55	2.27688	0.57942	3.92958	8.51e-05	0.00306448	lincRNA	Up
RP11-875H7.5	28.8761	-3.81136	0.570861	-6.67651	2.45e-11	4.31e-08	lincRNA	Down
RP11-879F14.2	21.6995	1.29523	0.361776	3.5802	0.000343325	0.00805878	lincRNA	Up
RP11-91K9.1	46.9007	1.9618	0.398936	4.91758	8.76e-07	0.000109926	lincRNA	Up
RP11-93I21.3	235.632	1.18636	0.338005	3.50988	0.000448311	0.00980499	lincRNA	Up
RP11-94H6.1	21.8493	-2.52118	0.576751	-4.37135	1.23e-05	0.000798109	lincRNA	Down
RP11-981G7.2	14.1942	-1.28446	0.30643	-4.19169	2.77e-05	0.00142718	lincRNA	Down
RP11-9G1.3	15.4864	-2.39435	0.555827	-4.30772	1.65e-05	0.000972462	lincRNA	Down
RP13-137A17.4	6.28264	-2.21441	0.519602	-4.26174	2.03e-05	0.00113878	lincRNA	Down
RP13-192B19.2	9.49751	2.06962	0.485939	4.25901	2.05e-05	0.00114554	lincRNA	Up
RP3-331H24.5	3198.28	-1.01189	0.288183	-3.51127	0.000445975	0.00978234	lincRNA	Down
RP3-522D1.1	23.9322	1.36989	0.27817	4.92467	8.45e-07	0.000106615	lincRNA	Up
RP4-723E3.1	124.845	1.95319	0.447924	4.36053	1.3e-05	0.000822288	lincRNA	Up
RP4-765H13.1	16.2744	-2.40241	0.570426	-4.2116	2.54e-05	0.00133832	lincRNA	Down
RP4-781K5.6	157.425	-2.1963	0.562977	-3.90124	9.57e-05	0.00333079	lincRNA	Down
RP5-1022J11.2	7.60445	1.92125	0.534108	3.59713	0.000321752	0.00770696	lincRNA	Up
RP5-1070A16.1	25.1771	2.41203	0.507888	4.74913	2.04e-06	0.000210604	lincRNA	Up
RP5-836J3.1	28.0588	-1.68626	0.421906	-3.99676	6.42e-05	0.00254885	lincRNA	Down
RP5-855F14.1	7.1657	-2.40943	0.60379	-3.9905	6.59e-05	0.00259724	lincRNA	Down
RP5-965F6.2	253.825	-2.52681	0.386357	-6.54009	6.15e-11	9.85e-08	lincRNA	Down
RP5-968D22.1	169.084	2.37531	0.602043	3.94541	7.97e-05	0.00294099	lincRNA	Up
RP5-968D22.3	290.621	2.24078	0.605091	3.70321	0.000212893	0.00575966	lincRNA	Up
RP5-968J1.1	28.7213	1.24909	0.355679	3.51186	0.000444989	0.00976869	lincRNA	Up
RP6-114E22.1	163.066	2.42665	0.410869	5.90613	3.5e-09	1.67e-06	lincRNA	Up
TPTEP1	159.348	-1.78745	0.41587	-4.2981	1.72e-05	0.00099892	lincRNA	Down
U73166.2	6.7116	-1.85572	0.39633	-4.68227	2.84e-06	0.00026962	lincRNA	Down
ZBTB20-AS2	129.511	-1.10104	0.243825	-4.51572	6.31e-06	0.000484384	lincRNA	Down
ZBTB20-AS3	74.8439	-1.22431	0.275545	-4.44325	8.86e-06	0.000621086	lincRNA	Down
ZNF385D-AS2	22.1884	-2.86435	0.561541	-5.10087	3.38e-07	5.62e-05	lincRNA	Down
ZNF667-AS1	85.4471	-1.71665	0.390525	-4.39576	1.1e-05	0.000731519	lincRNA	Down
MSTRG.11006.1	713.025	-3.03448	0.566013	-5.36115	8.27e-08	1.89e-05	lincRNA	Down
MSTRG.11007.1	431.388	-2.97875	0.569	-5.23506	1.65e-07	3.16e-05	lincRNA	Down
MSTRG.11165.1	50.355	2.62483	0.49005	5.35625	8.5e-08	1.93e-05	lincRNA	Up
MSTRG.11710.1	39.1325	-1.5016	0.3682	-4.07821	4.54e-05	0.00201516	lincRNA	Down
MSTRG.12998.10	128452	-2.20031	0.567435	-3.87764	0.000105473	0.00350257	lincRNA	Down
MSTRG.12998.12	152930	-1.62673	0.449222	-3.62121	0.000293224	0.00721353	lincRNA	Down
MSTRG.12998.2	129283	-2.20457	0.566122	-3.89416	9.85e-05	0.00336311	lincRNA	Down
MSTRG.12998.21	18251.6	-2.14448	0.498461	-4.3022	1.69e-05	0.000985485	lincRNA	Down
MSTRG.12998.22	18352.4	-2.14726	0.496412	-4.32557	1.52e-05	0.000918444	lincRNA	Down
MSTRG.12998.6	152760	-1.62737	0.449251	-3.62241	0.000291869	0.00720055	lincRNA	Down
MSTRG.12998.7	21937.9	-2.13667	0.588807	-3.62882	0.000284721	0.00711924	lincRNA	Down
MSTRG.12998.8	17209.2	-2.1043	0.591618	-3.55685	0.000375335	0.00861511	lincRNA	Down
MSTRG.12998.9	50380.5	-2.13264	0.588593	-3.62328	0.000290892	0.00720055	lincRNA	Down
MSTRG.13013.1	49128.4	-2.19736	0.562778	-3.90449	9.44e-05	0.00330257	lincRNA	Down
MSTRG.13930.1	557.895	-4.31185	0.475542	-9.06722	1.22e-19	4.3e-15	lincRNA	Down
MSTRG.14014.1	48.7699	2.85562	0.620206	4.60431	4.14e-06	0.000355387	lincRNA	Up
MSTRG.16425.1	1080.77	2.22267	0.614081	3.6195	0.000295172	0.00724795	lincRNA	Up
MSTRG.18569.1	72.7105	2.46409	0.542119	4.54529	5.49e-06	0.000437577	lincRNA	Up
MSTRG.18727.1	663.545	-3.60186	0.586738	-6.13878	8.32e-10	5.86e-07	lincRNA	Down
MSTRG.18729.1	555.656	-3.59345	0.588541	-6.1057	1.02e-09	6.94e-07	lincRNA	Down
MSTRG.18731.1	516.124	-3.61521	0.589874	-6.12879	8.86e-10	6.12e-07	lincRNA	Down
MSTRG.18732.1	614.756	-3.5778	0.601502	-5.94811	2.71e-09	1.37e-06	lincRNA	Down
MSTRG.1963.7	66330.1	-1.85054	0.505907	-3.65787	0.000254318	0.00653993	lincRNA	Down
MSTRG.20596.1	559.531	-1.30876	0.341919	-3.82768	0.000129359	0.00407568	lincRNA	Down
MSTRG.23010.1	1842.1	1.72275	0.450881	3.82087	0.000132984	0.004151	lincRNA	Up
MSTRG.2660.1	2705.07	-1.31182	0.367559	-3.569	0.000358344	0.00833987	lincRNA	Down
MSTRG.26732.11	674.408	-2.8801	0.484792	-5.9409	2.83e-09	1.41e-06	lincRNA	Down
MSTRG.29675.11	199.504	2.36339	0.554496	4.26224	2.02e-05	0.00113849	lincRNA	Up
MSTRG.29898.1	59.1929	-1.72861	0.461105	-3.74883	0.00017766	0.00512569	lincRNA	Down
MSTRG.4356.1	70.6439	1.18975	0.317966	3.74176	0.000182734	0.00522767	lincRNA	Up
MSTRG.4386.1	9.72506	-2.85434	0.600641	-4.75215	2.01e-06	0.0002087	lincRNA	Down
MSTRG.4531.2	2748.82	-2.46563	0.64669	-3.81269	0.000137461	0.00425489	lincRNA	Down
MSTRG.4532.1	2711.99	-2.85656	0.646427	-4.419	9.92e-06	0.00067231	lincRNA	Down
MSTRG.6425.1	7856.92	-1.69034	0.369761	-4.57145	4.84e-06	0.000400164	lincRNA	Down
MSTRG.6953.3	67527.8	-3.49052	0.612597	-5.69791	1.21e-08	4.55e-06	lincRNA	Down
MSTRG.6953.4	35614.1	-3.078	0.633993	-4.85495	1.2e-06	0.000138289	lincRNA	Down
MSTRG.7883.1	25.5594	-3.65041	0.57636	-6.33355	2.4e-10	2.31e-07	lincRNA	Down
MSTRG.7886.3	11.4507	-3.42939	0.622706	-5.50723	3.65e-08	1.02e-05	lincRNA	Down
MSTRG.8353.1	246.362	2.06784	0.463132	4.46491	8.01e-06	0.000570522	lincRNA	Up
MSTRG.8576.1	54.155	-2.24011	0.490397	-4.56795	4.93e-06	0.000405696	lincRNA	Down
MSTRG.9426.5	2999.9	2.19916	0.341607	6.43771	1.21e-10	1.58e-07	lincRNA	Up
MSTRG.9477.3	288.598	-1.31241	0.328065	-4.00046	6.32e-05	0.00251845	lincRNA	Down

## Sheet: Table S3-OSCC-vs-Normal.lncRNA
GeneID	baseMean	log2Fold	lfcSE	stat	pvalue	qvalue	Type	Diff
AC004063.1	6.6328	-2.51431	0.706207	-3.56031	0.000370422	0.00578829	lincRNA	Down
AC005304.1	29.4676	-2.46913	0.593241	-4.16211	3.15e-05	0.000866144	lincRNA	Down
AC007091.1	48.5072	-2.44387	0.643044	-3.80047	0.00014442	0.00281719	lincRNA	Down
AC007092.1	70.1874	-1.78493	0.45186	-3.95019	7.81e-05	0.00176381	lincRNA	Down
AC007392.3	65.6671	-2.13144	0.483099	-4.41202	1.02e-05	0.000349002	lincRNA	Down
AC007551.3	64.8153	-1.49492	0.319599	-4.6775	2.9e-06	0.000125242	lincRNA	Down
AC009495.4	250.011	-1.49501	0.371737	-4.0217	5.78e-05	0.00139464	lincRNA	Down
AC010084.1	42.8927	-2.40937	0.528206	-4.56141	5.08e-06	0.000198	lincRNA	Down
AC011752.1	59.9874	-1.64166	0.478965	-3.42752	0.000609119	0.00842277	lincRNA	Down
AC011891.5	5.44774	-2.91558	0.725006	-4.02145	5.78e-05	0.00139505	lincRNA	Down
AC012370.3	8.72421	-2.2804	0.635332	-3.58929	0.000331574	0.00532488	lincRNA	Down
AC012531.25	8.0121	3.38413	0.882619	3.83419	0.000125978	0.00252892	lincRNA	Up
AC012593.1	79.205	-3.62879	0.424967	-8.539	1.35e-17	1.57e-14	lincRNA	Down
AC013402.2	17.3572	-3.6161	0.593714	-6.09065	1.12e-09	1.7e-07	lincRNA	Down
AC016582.2	31.9125	-1.67978	0.42775	-3.92701	8.6e-05	0.00189161	lincRNA	Down
AC017002.1	200.751	2.13062	0.384078	5.54737	2.9e-08	2.58e-06	lincRNA	Up
AC017002.2	96.6626	2.69125	0.445485	6.04118	1.53e-09	2.22e-07	lincRNA	Up
AC017048.1	21.7095	-4.26317	0.733971	-5.80837	6.31e-09	7.21e-07	lincRNA	Down
AC017048.2	135.454	-3.84627	0.659975	-5.82791	5.61e-09	6.53e-07	lincRNA	Down
AC020601.1	20.6088	-3.95555	0.803599	-4.92229	8.55e-07	4.46e-05	lincRNA	Down
AC026150.8	107.315	-2.20992	0.40291	-5.48489	4.14e-08	3.51e-06	lincRNA	Down
AC060834.3	7.48102	-2.43693	0.71623	-3.40245	0.000667855	0.00902717	lincRNA	Down
AC068491.2	239.567	2.01149	0.413267	4.86729	1.13e-06	5.66e-05	lincRNA	Up
AC078842.4	50.3615	-3.93387	0.598413	-6.57384	4.9e-11	1.1e-08	lincRNA	Down
AC079305.11	100.762	-1.15426	0.307936	-3.74838	0.000177982	0.00331252	lincRNA	Down
AC079630.2	14.4343	-4.42938	0.677143	-6.54128	6.1e-11	1.33e-08	lincRNA	Down
AC090044.1	275.975	-2.89752	0.449962	-6.43947	1.2e-10	2.42e-08	lincRNA	Down
AC092684.1	56.6474	-1.34747	0.391826	-3.43894	0.000583986	0.00815368	lincRNA	Down
AC093159.1	19.198	-3.53983	0.875481	-4.04329	5.27e-05	0.00129234	lincRNA	Down
AC093381.2	100.604	-1.93867	0.478575	-4.05091	5.1e-05	0.00126338	lincRNA	Down
AC093901.1	132.505	2.72773	0.644678	4.23115	2.33e-05	0.000678275	lincRNA	Up
AC097499.1	34.792	-4.38816	0.570602	-7.69041	1.47e-14	7.43e-12	lincRNA	Down
AC097500.2	237.951	-1.21666	0.325241	-3.7408	0.000183432	0.00338098	lincRNA	Down
AC108066.1	49.4255	-2.17721	0.490804	-4.436	9.16e-06	0.000321052	lincRNA	Down
AC112721.2	9.99524	2.85754	0.759365	3.76306	0.000167846	0.0031675	lincRNA	Up
AC123768.4	67.048	-1.17847	0.306007	-3.85114	0.000117571	0.00239875	lincRNA	Down
AC133680.1	96.062	-2.84921	0.45371	-6.2798	3.39e-10	5.94e-08	lincRNA	Down
AC145110.1	103.803	3.23285	0.481628	6.71233	1.92e-11	4.74e-09	lincRNA	Up
AJ006995.3	118.662	-2.89505	0.667159	-4.33938	1.43e-05	0.00045578	lincRNA	Down
AL022344.4	11.6944	3.62624	0.873392	4.15191	3.3e-05	0.000899572	lincRNA	Up
AL035610.2	174.784	-2.00285	0.551886	-3.6291	0.000284415	0.00470962	lincRNA	Down
AP000462.2	159.288	-1.78075	0.49722	-3.58141	0.000341749	0.00545319	lincRNA	Down
AP000473.5	103.301	-2.78216	0.748957	-3.71471	0.000203439	0.00366438	lincRNA	Down
AP001605.4	19.0107	-1.99445	0.568698	-3.50705	0.000453107	0.00679242	lincRNA	Down
ARL5B-AS1	62.7456	-1.60852	0.464007	-3.46658	0.00052713	0.00757312	lincRNA	Down
BACH1-AS1	33.4337	1.62761	0.423497	3.84325	0.000121416	0.00245403	lincRNA	Up
BACH1-IT2	67.4617	1.44261	0.401002	3.5975	0.000321288	0.00520609	lincRNA	Up
BMS1P18	104.686	2.01574	0.580697	3.47124	0.000518053	0.00747669	lincRNA	Up
CTA-363E6.2	10.7497	-2.91822	0.703488	-4.14821	3.35e-05	0.000910389	lincRNA	Down
CTA-384D8.34	61.2658	3.28853	0.664556	4.94847	7.48e-07	3.99e-05	lincRNA	Up
CTA-384D8.35	102.864	3.21606	0.639033	5.0327	4.84e-07	2.75e-05	lincRNA	Up
CTA-392E5.1	591.81	3.18369	0.853989	3.72802	0.000192989	0.0035179	lincRNA	Up
CTA-520D8.2	63.0826	3.49015	0.558597	6.24806	4.16e-10	7.06e-08	lincRNA	Up
CTB-118N6.2	16.2114	-1.73545	0.456608	-3.80074	0.000144267	0.00281705	lincRNA	Down
CTB-151G24.1	70.3029	1.69753	0.365229	4.64784	3.35e-06	0.000141318	lincRNA	Up
CTB-60E11.4	27.8706	1.71949	0.467438	3.67855	0.000234564	0.00409319	lincRNA	Up
CTB-73N10.1	56.6059	-2.15166	0.471174	-4.56659	4.96e-06	0.000194691	lincRNA	Down
CTC-340D7.1	31.2846	-2.11426	0.490955	-4.30643	1.66e-05	0.00051701	lincRNA	Down
CTC-347C20.1	11.4714	-1.99595	0.551015	-3.62232	0.000291973	0.00481525	lincRNA	Down
CTC-436P18.3	92.8147	-2.63396	0.576268	-4.57071	4.86e-06	0.000192293	lincRNA	Down
CTC-513N18.7	408.028	-1.95823	0.425617	-4.60092	4.21e-06	0.000170947	lincRNA	Down
CTC-523E23.4	35.3744	-1.83601	0.50742	-3.61832	0.000296524	0.00486557	lincRNA	Down
CTC-523E23.5	29.3428	-1.6344	0.458824	-3.56215	0.000367833	0.00575337	lincRNA	Down
CTC-537E7.1	5.22569	-2.30531	0.674286	-3.41889	0.000628779	0.00863573	lincRNA	Down
CTC-806A22.1	92.3783	-2.3014	0.539523	-4.26562	1.99e-05	0.000602123	lincRNA	Down
CTD-2066L21.1	297.993	2.76657	0.777658	3.55757	0.000374301	0.00583765	lincRNA	Up
CTD-2091N23.1	31.9298	2.51167	0.644305	3.89826	9.69e-05	0.00207492	lincRNA	Up
CTD-2215E18.3	28.7143	2.24471	0.651374	3.44612	0.000568705	0.00802122	lincRNA	Up
CTD-2325B11.1	181.609	-3.32783	0.533068	-6.24279	4.3e-10	7.22e-08	lincRNA	Down
CTD-2357A8.3	44.0782	2.66337	0.688262	3.8697	0.00010897	0.00225589	lincRNA	Up
CTD-2554C21.2	10.4333	-2.64934	0.705158	-3.75709	0.000171903	0.00322342	lincRNA	Down
CTD-2555C10.3	49.9546	1.80284	0.535106	3.36912	0.000754081	0.00991183	lincRNA	Up
CTD-3032H12.2	8.40706	-2.18149	0.616404	-3.53905	0.000401566	0.00615664	lincRNA	Down
CTD-3179P9.1	1287.61	-3.0702	0.546927	-5.61354	1.98e-08	1.91e-06	lincRNA	Down
CXorf49	6.29825	3.19283	0.891293	3.58224	0.000340658	0.00543846	lincRNA	Up
CXorf49B	7.16616	3.29098	0.886963	3.7104	0.000206936	0.00370066	lincRNA	Up
CYP4F35P	17.8557	-4.36226	0.77141	-5.65492	1.56e-08	1.56e-06	lincRNA	Down
DIO3OS	26.2525	-1.94453	0.449272	-4.32819	1.5e-05	0.000475349	lincRNA	Down
EPB41L4A-AS1	212.59	-1.66061	0.404099	-4.10941	3.97e-05	0.00103398	lincRNA	Down
FAM41AY1	3.86607	-3.95507	0.811662	-4.87281	1.1e-06	5.52e-05	lincRNA	Down
FAM41AY2	3.97222	-4.58189	0.870964	-5.26071	1.43e-07	1.01e-05	lincRNA	Down
FAM66B	94.8497	-1.91016	0.50224	-3.80328	0.000142795	0.0027922	lincRNA	Down
FAM66E	58.6212	-2.14481	0.534631	-4.01176	6.03e-05	0.00144181	lincRNA	Down
FGF14-IT1	142.783	-4.36043	0.589089	-7.402	1.34e-13	5.18e-11	lincRNA	Down
GS1-122H1.2	64.0063	-2.41443	0.473746	-5.09647	3.46e-07	2.08e-05	lincRNA	Down
GS1-600G8.5	49.6076	4.42671	0.752429	5.88323	4.02e-09	4.98e-07	lincRNA	Up
HCG22	48.3299	-3.17378	0.831049	-3.819	0.000133993	0.00265188	lincRNA	Down
HIF1A-AS1	175.646	1.21565	0.297727	4.08309	4.44e-05	0.00113786	lincRNA	Up
HIF1A-AS2	10878.8	1.02247	0.234778	4.35506	1.33e-05	0.000432414	lincRNA	Up
LA16c-444G7.1	54.2205	1.49059	0.373355	3.99241	6.54e-05	0.00153196	lincRNA	Up
LINC00152	3414.5	2.17235	0.304736	7.12865	1.01e-12	3.29e-10	lincRNA	Up
LINC00159	57.3619	-1.90712	0.4212	-4.52782	5.96e-06	0.000225586	lincRNA	Down
LINC00271	315.295	-1.64272	0.476482	-3.4476	0.000565584	0.00798414	lincRNA	Down
LINC00277	10.0023	-3.34297	0.702514	-4.75859	1.95e-06	9.01e-05	lincRNA	Down
LINC00324	23.4978	-1.78929	0.456501	-3.91957	8.87e-05	0.00193653	lincRNA	Down
LINC00460	17.4047	2.95787	0.87822	3.36803	0.000757068	0.00993347	lincRNA	Up
LINC00499	147.081	-3.99472	0.684572	-5.83535	5.37e-09	6.29e-07	lincRNA	Down
LINC00500	10.5594	-2.96504	0.85159	-3.48177	0.000498111	0.00727542	lincRNA	Down
LINC00559	8.2644	-2.53661	0.678796	-3.73693	0.000186283	0.00342575	lincRNA	Down
LINC00592	33.9839	2.38456	0.650139	3.66777	0.000244671	0.00423765	lincRNA	Up
LINC00639	115.677	-2.35729	0.470795	-5.00705	5.53e-07	3.09e-05	lincRNA	Down
LINC00691	24.816	-2.15471	0.609397	-3.5358	0.000406536	0.00622077	lincRNA	Down
LINC00707	639.316	3.52593	0.470499	7.49401	6.68e-14	2.85e-11	lincRNA	Up
LINC00885	26.9788	-1.91601	0.565346	-3.3891	0.000701227	0.00938828	lincRNA	Down
LINC00958	1243.84	3.11268	0.385922	8.06558	7.29e-16	5.45e-13	lincRNA	Up
LINC00968	64.8902	-1.88412	0.433897	-4.34231	1.41e-05	0.000451056	lincRNA	Down
LINC00992	27.669	-2.16801	0.39699	-5.46111	4.73e-08	3.9e-06	lincRNA	Down
LINC01011	31.2128	-1.98474	0.424313	-4.67755	2.9e-06	0.000125242	lincRNA	Down
LINC01050	20.769	2.93784	0.769889	3.81593	0.000135673	0.00267715	lincRNA	Up
LINC01060	638.058	3.69527	0.499667	7.39546	1.41e-13	5.38e-11	lincRNA	Up
LLNLR-249E10.1	4.3712	-3.18722	0.80308	-3.96875	7.23e-05	0.00165757	lincRNA	Down
LUCAT1	280.469	2.10449	0.535238	3.93188	8.43e-05	0.00186503	lincRNA	Up
MIR4435-1HG	7606.36	2.01297	0.326276	6.16955	6.85e-10	1.08e-07	lincRNA	Up
OSER1-AS1	35.6672	-1.33138	0.34917	-3.813	0.00013729	0.00270411	lincRNA	Down
RP1-193H18.3	66.4657	-2.49794	0.346869	-7.20138	5.96e-13	2.01e-10	lincRNA	Down
RP1-23E21.2	6.0677	-3.65742	0.911347	-4.0132	5.99e-05	0.00143623	lincRNA	Down
RP1-251M9.2	24.1459	-3.15191	0.599148	-5.26065	1.44e-07	1.01e-05	lincRNA	Down
RP1-261G23.5	10.6729	2.92394	0.849426	3.44225	0.0005769	0.00809457	lincRNA	Up
RP1-34H18.1	1231.93	-3.61133	0.647363	-5.57853	2.43e-08	2.25e-06	lincRNA	Down
RP1-90G24.6	14.4507	-1.80085	0.534249	-3.3708	0.000749491	0.00987816	lincRNA	Down
RP1-90J4.1	37.025	3.51496	0.638075	5.50869	3.62e-08	3.15e-06	lincRNA	Up
RP1-97G4.1	65.8487	-3.52686	0.676609	-5.21255	1.86e-07	1.26e-05	lincRNA	Down
RP11-1000B6.3	538.553	-1.7175	0.415805	-4.13054	3.62e-05	0.000968696	lincRNA	Down
RP11-1002K11.1	145.674	2.61102	0.590107	4.42466	9.66e-06	0.000334775	lincRNA	Up
RP11-1008C21.1	85.5772	-1.878	0.39581	-4.74471	2.09e-06	9.55e-05	lincRNA	Down
RP11-1008C21.2	13.2851	-2.20076	0.635328	-3.46397	0.000532267	0.00761992	lincRNA	Down
RP11-100L22.1	8.24293	-2.99398	0.627249	-4.7732	1.81e-06	8.45e-05	lincRNA	Down
RP11-1028N23.4	13.2601	-3.07572	0.729763	-4.21469	2.5e-05	0.000719975	lincRNA	Down
RP11-108K3.1	5938.71	3.39596	0.442489	7.67467	1.66e-14	8.15e-12	lincRNA	Up
RP11-108K3.2	56.5254	3.18999	0.628252	5.07756	3.82e-07	2.26e-05	lincRNA	Up
RP11-1100L3.8	98.4696	-2.75202	0.734324	-3.74769	0.000178468	0.00331776	lincRNA	Down
RP11-110L15.1	14.7797	-3.07328	0.680127	-4.51869	6.22e-06	0.000233087	lincRNA	Down
RP11-111F5.3	48.1716	-3.01297	0.739485	-4.07441	4.61e-05	0.00117097	lincRNA	Down
RP11-111F5.4	68.8761	-1.6916	0.479603	-3.52709	0.000420157	0.00638402	lincRNA	Down
RP11-114G22.1	1158.34	-4.30537	0.711051	-6.05493	1.4e-09	2.06e-07	lincRNA	Down
RP11-114H21.2	9.1927	-2.9267	0.647477	-4.52017	6.18e-06	0.000231731	lincRNA	Down
RP11-114J13.1	50.7145	-1.66319	0.330395	-5.03394	4.8e-07	2.75e-05	lincRNA	Down
RP11-118B18.1	487.858	-2.3863	0.404315	-5.9021	3.59e-09	4.56e-07	lincRNA	Down
RP11-121M22.1	50.4544	-1.92032	0.500226	-3.83891	0.000123584	0.00249009	lincRNA	Down
RP11-128P17.2	2.41536	-3.01974	0.870573	-3.46868	0.000523029	0.00753757	lincRNA	Down
RP11-12D16.2	17.3111	3.46343	0.841301	4.11675	3.84e-05	0.00101259	lincRNA	Up
RP11-131K5.1	36.9324	-2.35482	0.427163	-5.5127	3.53e-08	3.1e-06	lincRNA	Down
RP11-131N11.4	8.2359	-2.23558	0.64689	-3.45589	0.000548472	0.00780712	lincRNA	Down
RP11-132E11.2	7.76233	-2.00335	0.528141	-3.79322	0.000148706	0.00288346	lincRNA	Down
RP11-133F8.2	36.4341	-3.14588	0.597788	-5.26253	1.42e-07	1e-05	lincRNA	Down
RP11-136K7.2	54.5424	-2.67312	0.792997	-3.37091	0.000749203	0.00987816	lincRNA	Down
RP11-13N12.1	58.833	-3.20614	0.556184	-5.76453	8.19e-09	9.1e-07	lincRNA	Down
RP11-141E13.1	16.5228	-2.58491	0.635623	-4.06674	4.77e-05	0.00119893	lincRNA	Down
RP11-144A16.5	5.33805	-3.80462	0.750562	-5.06903	4e-07	2.35e-05	lincRNA	Down
RP11-149B9.2	14.3824	4.25925	0.833555	5.10975	3.23e-07	1.98e-05	lincRNA	Up
RP11-152P17.3	260.312	5.42009	0.718533	7.54327	4.58e-14	2.01e-11	lincRNA	Up
RP11-153K16.1	243.894	-3.7934	0.844284	-4.49304	7.02e-06	0.000256529	lincRNA	Down
RP11-172F10.1	132.56	-4.89977	0.481174	-10.1829	2.36e-24	1.1e-20	lincRNA	Down
RP11-175B12.2	115.248	2.86867	0.485642	5.90697	3.48e-09	4.45e-07	lincRNA	Up
RP11-187C18.2	664.096	-1.66173	0.332754	-4.99387	5.92e-07	3.27e-05	lincRNA	Down
RP11-191L9.4	1627.81	2.88483	0.742771	3.88388	0.000102804	0.00216836	lincRNA	Up
RP11-201E8.1	34.3097	-2.56815	0.659791	-3.89238	9.93e-05	0.002112	lincRNA	Down
RP11-202K23.1	31.2926	-2.61766	0.499012	-5.24569	1.56e-07	1.08e-05	lincRNA	Down
RP11-203M5.8	956.207	1.74649	0.384672	4.54021	5.62e-06	0.000213976	lincRNA	Up
RP11-213H15.4	32.6368	2.88167	0.59029	4.88179	1.05e-06	5.31e-05	lincRNA	Up
RP11-215P8.4	63.4924	2.75189	0.779314	3.53117	0.000413721	0.00629508	lincRNA	Up
RP11-217E22.5	355.955	-4.19349	0.741333	-5.65669	1.54e-08	1.55e-06	lincRNA	Down
RP11-218D6.4	25.1803	-1.76284	0.497457	-3.5437	0.000394547	0.00608363	lincRNA	Down
RP11-221J22.1	45.5544	2.09888	0.558267	3.75964	0.000170161	0.00319948	lincRNA	Up
RP11-221J22.2	24.5003	2.16764	0.554101	3.912	9.15e-05	0.00198889	lincRNA	Up
RP11-221N13.3	39.5261	2.96282	0.764944	3.87325	0.000107395	0.00223684	lincRNA	Up
RP11-250B2.6	25.8513	-1.38487	0.348844	-3.96988	7.19e-05	0.00165271	lincRNA	Down
RP11-252C15.1	15.5147	-3.22766	0.813514	-3.96755	7.26e-05	0.00166475	lincRNA	Down
RP11-255M2.2	19.3342	-3.26325	0.781394	-4.17619	2.96e-05	0.000826855	lincRNA	Down
RP11-258C19.5	1144.82	-1.47204	0.315621	-4.66396	3.1e-06	0.000131708	lincRNA	Down
RP11-259O2.1	102.291	-1.64666	0.476523	-3.45557	0.000549132	0.00781309	lincRNA	Down
RP11-259O2.2	13.725	-2.38287	0.496292	-4.80134	1.58e-06	7.44e-05	lincRNA	Down
RP11-25I15.3	200.322	3.7405	0.679064	5.50832	3.62e-08	3.15e-06	lincRNA	Up
RP11-266K4.9	15.7743	-1.67069	0.45967	-3.63455	0.000278462	0.00463723	lincRNA	Down
RP11-274B18.4	26.8649	-2.12523	0.623147	-3.41048	0.000648479	0.00882002	lincRNA	Down
RP11-276H19.1	177.369	-3.11751	0.480339	-6.49023	8.57e-11	1.78e-08	lincRNA	Down
RP11-277P12.9	19.721	-3.19905	0.621295	-5.14899	2.62e-07	1.65e-05	lincRNA	Down
RP11-27G24.1	8.17766	-2.53543	0.72373	-3.50329	0.000459552	0.0068605	lincRNA	Down
RP11-281P23.2	162.48	-1.24136	0.31654	-3.92166	8.79e-05	0.00192626	lincRNA	Down
RP11-285B24.1	44.129	-5.29555	0.762507	-6.94492	3.79e-12	1.11e-09	lincRNA	Down
RP11-290F20.2	35.2082	1.82447	0.499222	3.65464	0.000257547	0.00439265	lincRNA	Up
RP11-292E2.4	37.7289	-1.92389	0.541705	-3.55155	0.000382964	0.00593037	lincRNA	Down
RP11-297P16.4	607.721	6.88275	0.740599	9.29349	1.49e-20	3.46e-17	lincRNA	Up
RP11-2A4.3	8.03764	-4.37728	0.848384	-5.15955	2.48e-07	1.58e-05	lincRNA	Down
RP11-307P5.1	1196.72	-2.46606	0.578626	-4.26192	2.03e-05	0.000609343	lincRNA	Down
RP11-314P15.2	44.218	-2.04848	0.334434	-6.12521	9.06e-10	1.4e-07	lincRNA	Down
RP11-328J2.1	22.2535	-1.30959	0.38027	-3.44385	0.000573495	0.00805725	lincRNA	Down
RP11-340B18.1	184.34	3.12921	0.757522	4.13084	3.61e-05	0.000968696	lincRNA	Up
RP11-340I6.8	12.7165	-2.44742	0.466512	-5.24621	1.55e-07	1.08e-05	lincRNA	Down
RP11-345M22.3	10.6404	-2.77052	0.785562	-3.52679	0.000420623	0.00638512	lincRNA	Down
RP11-346D14.1	27.8659	-3.32173	0.774972	-4.28625	1.82e-05	0.000556107	lincRNA	Down
RP11-346D19.1	65.3009	1.84604	0.545717	3.38278	0.000717558	0.0095439	lincRNA	Up
RP11-346J10.1	8.75298	-1.77736	0.514901	-3.45184	0.000556778	0.00788593	lincRNA	Down
RP11-347J14.8	5.49134	-3.92654	0.727791	-5.39514	6.85e-08	5.28e-06	lincRNA	Down
RP11-348F1.2	42.1804	-1.66838	0.472201	-3.53319	0.000410576	0.00626781	lincRNA	Down
RP11-348J24.2	389.437	-4.33638	0.548567	-7.90491	2.68e-15	1.67e-12	lincRNA	Down
RP11-351J23.1	79.2116	-3.01135	0.726655	-4.14412	3.41e-05	0.000924464	lincRNA	Down
RP11-351J23.2	7.46558	-2.61262	0.741426	-3.52378	0.000425431	0.00643798	lincRNA	Down
RP11-352D13.5	3.7211	-2.6058	0.722	-3.60914	0.000307216	0.00501312	lincRNA	Down
RP11-367F23.2	15.7094	3.5657	0.803433	4.43808	9.08e-06	0.000318666	lincRNA	Up
RP11-368I23.2	8.69573	-2.40467	0.636714	-3.77668	0.000158931	0.00303279	lincRNA	Down
RP11-373D23.3	19.0131	-2.10628	0.458619	-4.59266	4.38e-06	0.000175924	lincRNA	Down
RP11-378A12.1	5.10782	-3.47486	0.881518	-3.9419	8.08e-05	0.0018084	lincRNA	Down
RP11-380D23.2	92.7164	-4.51333	0.869436	-5.1911	2.09e-07	1.37e-05	lincRNA	Down
RP11-383C5.3	14.3862	-2.19785	0.592875	-3.70711	0.000209642	0.0037367	lincRNA	Down
RP11-383C5.4	41.9928	-1.6229	0.438578	-3.70037	0.000215286	0.00381841	lincRNA	Down
RP11-384F7.2	566.213	-5.13644	0.577478	-8.89461	5.86e-19	9.51e-16	lincRNA	Down
RP11-388K12.1	9.51527	-3.8326	0.82635	-4.63799	3.52e-06	0.000147166	lincRNA	Down
RP11-388K12.2	20.4744	-3.72686	0.753589	-4.94548	7.6e-07	4.03e-05	lincRNA	Down
RP11-395N3.2	64.9437	2.36492	0.633408	3.73364	0.000188732	0.0034649	lincRNA	Up
RP11-400N13.3	390.722	2.52841	0.628256	4.0245	5.71e-05	0.00138124	lincRNA	Up
RP11-407A16.3	15.653	-1.7446	0.446111	-3.91069	9.2e-05	0.00199433	lincRNA	Down
RP11-407A16.4	14.1569	-1.77248	0.510275	-3.47357	0.000513586	0.00744094	lincRNA	Down
RP11-410D17.2	110.269	-1.32762	0.28889	-4.59558	4.32e-06	0.000173904	lincRNA	Down
RP11-410E4.1	50.916	-1.20678	0.338142	-3.56885	0.000358548	0.00566	lincRNA	Down
RP11-420A23.1	1232.87	-2.52953	0.516981	-4.89289	9.94e-07	5.04e-05	lincRNA	Down
RP11-429O1.1	28.8426	-1.97344	0.563019	-3.50511	0.000456417	0.0068251	lincRNA	Down
RP11-431D12.1	3.1676	-3.40907	0.870044	-3.91827	8.92e-05	0.00194309	lincRNA	Down
RP11-444D3.1	1299.12	-1.91024	0.362811	-5.26512	1.4e-07	9.94e-06	lincRNA	Down
RP11-451G4.2	78.3719	-3.33795	0.873123	-3.82301	0.000131834	0.00261412	lincRNA	Down
RP11-452C8.1	28.1687	-2.20377	0.597975	-3.68539	0.000228352	0.00401721	lincRNA	Down
RP11-454C18.1	23.515	-2.4287	0.697371	-3.48265	0.000496484	0.00726147	lincRNA	Down
RP11-466L17.1	169.424	-4.44932	0.671092	-6.62997	3.36e-11	7.84e-09	lincRNA	Down
RP11-473L15.3	36.6136	-3.81767	0.70844	-5.38884	7.09e-08	5.43e-06	lincRNA	Down
RP11-475O6.1	981.816	-3.5132	0.54525	-6.44327	1.17e-10	2.37e-08	lincRNA	Down
RP11-480D4.1	34.8583	-1.75442	0.502438	-3.49181	0.000479754	0.00708385	lincRNA	Down
RP11-480D4.2	18.6901	-2.13573	0.52771	-4.04717	5.18e-05	0.00127692	lincRNA	Down
RP11-493L12.5	57.6876	2.61593	0.484037	5.40439	6.5e-08	5.06e-06	lincRNA	Up
RP11-509J21.1	1803.36	-1.28319	0.353079	-3.6343	0.000278737	0.0046381	lincRNA	Down
RP11-552E20.4	3.6001	-3.97884	0.901772	-4.41225	1.02e-05	0.000349002	lincRNA	Down
RP11-553L6.5	339.806	-1.80546	0.506555	-3.5642	0.000364964	0.0057306	lincRNA	Down
RP11-554D14.6	20.1038	-2.33204	0.60617	-3.84717	0.000119488	0.00242413	lincRNA	Down
RP11-554I8.2	25.692	2.69465	0.692635	3.89044	0.000100064	0.002123	lincRNA	Up
RP11-556I14.1	55.9008	-1.50574	0.432966	-3.47773	0.000505678	0.00735284	lincRNA	Down
RP11-556I14.2	223.854	-2.06098	0.459472	-4.48555	7.27e-06	0.000263015	lincRNA	Down
RP11-572C15.6	383.571	-2.22474	0.581034	-3.82893	0.000128699	0.00256608	lincRNA	Down
RP11-578F21.6	67.6678	-2.1525	0.567742	-3.79133	0.000149842	0.00290101	lincRNA	Down
RP11-608O21.1	323.719	-2.39745	0.678917	-3.53128	0.000413553	0.00629508	lincRNA	Down
RP11-624A4.1	25.043	2.772	0.806963	3.4351	0.00059233	0.00824232	lincRNA	Up
RP11-631F7.2	12.069	-2.33319	0.665546	-3.50568	0.000455438	0.00681884	lincRNA	Down
RP11-647P12.1	3.32296	-3.59248	0.881089	-4.07732	4.56e-05	0.00116187	lincRNA	Down
RP11-678G14.3	12.183	-2.85761	0.83773	-3.41114	0.00064693	0.00881376	lincRNA	Down
RP11-682N22.1	225.238	-1.61148	0.452266	-3.56312	0.000366467	0.00574309	lincRNA	Down
RP11-707A18.1	110.005	-6.15406	0.697035	-8.82891	1.06e-18	1.56e-15	lincRNA	Down
RP11-719N22.2	111.819	-5.15741	0.641113	-8.04447	8.66e-16	6.11e-13	lincRNA	Down
RP11-71H9.1	18.9947	-2.50007	0.664957	-3.75975	0.000170082	0.00319948	lincRNA	Down
RP11-71H9.2	12.5724	-3.58736	0.803197	-4.46635	7.96e-06	0.000283944	lincRNA	Down
RP11-757O6.1	24.2113	-4.3111	0.640267	-6.73328	1.66e-11	4.14e-09	lincRNA	Down
RP11-761E20.1	683.336	-2.67403	0.695356	-3.84556	0.000120277	0.00243558	lincRNA	Down
RP11-768G7.2	41.7632	-5.40117	0.74065	-7.29247	3.04e-13	1.07e-10	lincRNA	Down
RP11-76I14.1	19.3725	-2.86895	0.636271	-4.50901	6.51e-06	0.00024175	lincRNA	Down
RP11-770G2.2	69.3503	-1.78144	0.482885	-3.68916	0.000224992	0.00396455	lincRNA	Down
RP11-774O3.3	60.2314	-2.2304	0.436585	-5.10874	3.24e-07	1.99e-05	lincRNA	Down
RP11-778H2.1	62.3069	-1.78766	0.459413	-3.89119	9.98e-05	0.00211981	lincRNA	Down
RP11-779P15.2	8.75061	-2.55755	0.638866	-4.00327	6.25e-05	0.00148142	lincRNA	Down
RP11-781A6.1	55.2821	-2.98848	0.7586	-3.93946	8.17e-05	0.00182328	lincRNA	Down
RP11-78C3.1	10.4469	2.99182	0.8571	3.49064	0.000481871	0.00709896	lincRNA	Up
RP11-790J24.1	11.6771	-3.43662	0.725757	-4.73521	2.19e-06	9.93e-05	lincRNA	Down
RP11-809H16.5	7.02362	-3.95809	0.767207	-5.15909	2.48e-07	1.58e-05	lincRNA	Down
RP11-80H8.4	50.7001	2.43636	0.570946	4.26724	1.98e-05	0.000598337	lincRNA	Up
RP11-81N13.1	444.67	-1.38555	0.319352	-4.33865	1.43e-05	0.000456841	lincRNA	Down
RP11-863P13.3	78.151	1.82661	0.534829	3.41532	0.000637073	0.00872379	lincRNA	Up
RP11-875H7.5	109.381	-5.58988	0.933627	-5.98727	2.13e-09	2.96e-07	lincRNA	Down
RP11-876F14.1	4.79362	-3.00598	0.837057	-3.59113	0.000329247	0.00529275	lincRNA	Down
RP11-886D15.1	14.8575	-2.43919	0.507623	-4.80512	1.55e-06	7.31e-05	lincRNA	Down
RP11-90C4.1	26.7033	-4.36771	0.734537	-5.94621	2.74e-09	3.62e-07	lincRNA	Down
RP11-91K9.1	65.5719	2.54406	0.673986	3.77464	0.000160238	0.00304696	lincRNA	Up
RP11-932O9.9	34.4348	-1.19872	0.353948	-3.38673	0.000707316	0.0094503	lincRNA	Down
RP11-95K23.6	5.30846	-3.64952	0.713047	-5.11821	3.08e-07	1.91e-05	lincRNA	Down
RP11-963H4.3	10.2048	-3.15858	0.692393	-4.56184	5.07e-06	0.000197952	lincRNA	Down
RP11-96D24.1	12.1855	-1.81036	0.483857	-3.74153	0.000182904	0.00337509	lincRNA	Down
RP11-981G7.2	14.4981	-2.06251	0.527435	-3.91046	9.21e-05	0.00199496	lincRNA	Down
RP13-631K18.5	17.6937	2.64552	0.694209	3.81084	0.000138494	0.00272288	lincRNA	Up
RP13-726E6.1	68.0818	-1.29375	0.351905	-3.67641	0.000236536	0.00412317	lincRNA	Down
RP3-337D23.3	15.8673	-1.99824	0.485841	-4.11295	3.91e-05	0.00102362	lincRNA	Down
RP3-522D1.1	31.3679	1.43006	0.408224	3.50313	0.00045982	0.00686134	lincRNA	Up
RP4-666F24.3	2.89615	-2.7819	0.810193	-3.43363	0.000595564	0.00827059	lincRNA	Down
RP4-734C18.1	99.8831	-3.18436	0.543067	-5.86365	4.53e-09	5.48e-07	lincRNA	Down
RP4-765H13.1	13.17	-3.48501	0.701988	-4.96449	6.89e-07	3.71e-05	lincRNA	Down
RP4-781K5.8	13.0752	-2.52684	0.634763	-3.98075	6.87e-05	0.00159181	lincRNA	Down
RP4-794H19.2	315.085	-1.37779	0.256679	-5.36775	7.97e-08	5.95e-06	lincRNA	Down
RP4-813D12.3	4.49369	-2.70451	0.791812	-3.4156	0.000636427	0.0087223	lincRNA	Down
RP5-1011O1.3	90.618	3.60605	0.603185	5.97835	2.25e-09	3.09e-07	lincRNA	Up
RP5-1112F19.2	56.3798	3.43194	0.807783	4.24859	2.15e-05	0.000639069	lincRNA	Up
RP5-833A20.1	102.864	-1.50122	0.443955	-3.38146	0.000721005	0.00957405	lincRNA	Down
RP5-836J3.1	53.6893	-3.65902	0.646572	-5.65911	1.52e-08	1.53e-06	lincRNA	Down
RP5-884M6.1	169.603	3.7791	0.756961	4.99246	5.96e-07	3.29e-05	lincRNA	Up
RP5-965F6.2	278.615	-3.88892	0.431122	-9.02047	1.87e-19	3.8e-16	lincRNA	Down
RP6-114E22.1	238.92	3.33667	0.606111	5.50505	3.69e-08	3.19e-06	lincRNA	Up
SNHG15	105.725	1.83979	0.437619	4.20409	2.62e-05	0.000747253	lincRNA	Up
TPTEP1	118.194	-2.17013	0.514033	-4.22177	2.42e-05	0.000702081	lincRNA	Down
ZNF503-AS1	82.6586	-2.10853	0.469461	-4.49139	7.08e-06	0.000257916	lincRNA	Down
ZNF667-AS1	70.9585	-2.28306	0.514901	-4.43398	9.25e-06	0.000323306	lincRNA	Down
MSTRG.10422.1	288.487	-1.63536	0.467893	-3.49515	0.000473794	0.00702338	lincRNA	Down
MSTRG.10424.1	419.375	-1.84966	0.488993	-3.78259	0.000155207	0.00297924	lincRNA	Down
MSTRG.10577.1	563.166	-1.74549	0.508249	-3.43432	0.000594037	0.00825998	lincRNA	Down
MSTRG.10786.3	30.9922	2.10539	0.539092	3.90544	9.41e-05	0.00202867	lincRNA	Up
MSTRG.10792.1	21723.5	-1.08658	0.245256	-4.43038	9.41e-06	0.000327416	lincRNA	Down
MSTRG.1089.3	7420.97	5.20942	0.820683	6.34766	2.19e-10	4.16e-08	lincRNA	Up
MSTRG.11006.1	798.722	-4.52935	0.770301	-5.87997	4.1e-09	5.06e-07	lincRNA	Down
MSTRG.11007.1	485.95	-4.46822	0.77781	-5.74462	9.21e-09	1.02e-06	lincRNA	Down
MSTRG.11165.1	76.4913	2.89453	0.714843	4.04918	5.14e-05	0.00126985	lincRNA	Up
MSTRG.11599.1	920.274	1.17518	0.316489	3.71318	0.000204671	0.00367962	lincRNA	Up
MSTRG.11629.1	1391.39	1.30677	0.377925	3.45776	0.000544679	0.00777017	lincRNA	Up
MSTRG.11710.1	30.4375	-1.78147	0.48245	-3.69255	0.000222014	0.00391846	lincRNA	Down
MSTRG.1232.1	4203.59	2.61507	0.749267	3.49017	0.000482713	0.00710813	lincRNA	Up
MSTRG.12998.10	69409.6	-3.27807	0.749279	-4.37497	1.21e-05	0.000401199	lincRNA	Down
MSTRG.12998.2	70017.7	-3.28095	0.745716	-4.39973	1.08e-05	0.00036436	lincRNA	Down
MSTRG.12998.21	10239.2	-2.91564	0.620306	-4.70032	2.6e-06	0.000114489	lincRNA	Down
MSTRG.12998.22	10296	-2.91052	0.617014	-4.71712	2.39e-06	0.00010748	lincRNA	Down
MSTRG.12998.7	12117.1	-3.22411	0.814121	-3.96023	7.49e-05	0.00170336	lincRNA	Down
MSTRG.12998.8	9255.75	-3.17535	0.819168	-3.87632	0.00010605	0.00222526	lincRNA	Down
MSTRG.12998.9	28708.5	-3.29394	0.806385	-4.08482	4.41e-05	0.00113166	lincRNA	Down
MSTRG.13013.1	24456.6	-3.06815	0.745347	-4.1164	3.85e-05	0.00101315	lincRNA	Down
MSTRG.13208.2	1058.3	1.08778	0.183225	5.93685	2.91e-09	3.82e-07	lincRNA	Up
MSTRG.13930.1	259.227	-4.87701	0.487709	-9.99984	1.53e-23	6.19e-20	lincRNA	Down
MSTRG.16733.24	904.831	2.24561	0.352673	6.3674	1.92e-10	3.74e-08	lincRNA	Up
MSTRG.16898.1	1014.49	1.67078	0.46692	3.5783	0.000345838	0.0054995	lincRNA	Up
MSTRG.17055.1	548.223	-2.33912	0.587236	-3.98327	6.8e-05	0.00157959	lincRNA	Down
MSTRG.17280.2	5221.15	1.46265	0.361296	4.04835	5.16e-05	0.00127246	lincRNA	Up
MSTRG.17417.1	5935.48	1.26416	0.334705	3.77694	0.00015877	0.00303148	lincRNA	Up
MSTRG.17424.1	67.1273	-2.60529	0.576906	-4.51597	6.3e-06	0.000235287	lincRNA	Down
MSTRG.17488.1	114.403	3.72232	0.875606	4.25113	2.13e-05	0.000633578	lincRNA	Up
MSTRG.17496.1	17818.8	1.7989	0.514179	3.49859	0.000467724	0.00695469	lincRNA	Up
MSTRG.17496.4	13018.7	2.15314	0.565049	3.81053	0.000138669	0.00272302	lincRNA	Up
MSTRG.17496.5	13018.5	2.15312	0.565044	3.81054	0.000138664	0.00272302	lincRNA	Up
MSTRG.17997.6	376.381	-1.69532	0.461754	-3.67147	0.000241157	0.00418798	lincRNA	Down
MSTRG.18150.1	25.0081	-3.5861	0.682405	-5.2551	1.48e-07	1.04e-05	lincRNA	Down
MSTRG.18727.1	144.364	-3.98144	0.801634	-4.96666	6.81e-07	3.67e-05	lincRNA	Down
MSTRG.18729.1	126.884	-2.98087	0.8811	-3.38312	0.000716668	0.00953964	lincRNA	Down
MSTRG.18731.1	115.152	-2.98211	0.885024	-3.36953	0.000752971	0.00990373	lincRNA	Down
MSTRG.19600.1	117.362	3.00615	0.579969	5.18329	2.18e-07	1.42e-05	lincRNA	Up
MSTRG.20327.1	92.6866	-2.56555	0.632325	-4.05733	4.96e-05	0.00123388	lincRNA	Down
MSTRG.20596.1	763.02	-2.86324	0.424118	-6.75104	1.47e-11	3.69e-09	lincRNA	Down
MSTRG.21008.1	512.006	-1.5917	0.384677	-4.13777	3.51e-05	0.000946399	lincRNA	Down
MSTRG.21429.1	1379.16	1.42603	0.370555	3.84837	0.000118905	0.00241836	lincRNA	Up
MSTRG.21801.1	438.693	-2.2445	0.606097	-3.7032	0.000212895	0.00378221	lincRNA	Down
MSTRG.21805.18	2797.3	-1.93327	0.469783	-4.11525	3.87e-05	0.00101591	lincRNA	Down
MSTRG.22106.1	181.396	3.26402	0.725194	4.50089	6.77e-06	0.000248885	lincRNA	Up
MSTRG.22484.2	705.477	6.96658	0.74019	9.41189	4.87e-21	1.22e-17	lincRNA	Up
MSTRG.23010.1	2525.81	2.51947	0.568242	4.4338	9.26e-06	0.000323306	lincRNA	Up
MSTRG.23036.2	1652.47	3.55035	0.54725	6.48762	8.72e-11	1.8e-08	lincRNA	Up
MSTRG.23973.1	80.9321	2.9243	0.718363	4.07078	4.69e-05	0.00118475	lincRNA	Up
MSTRG.23995.1	270.682	-1.78231	0.488505	-3.64849	0.000263786	0.00447086	lincRNA	Down
MSTRG.24307.1	35.549	3.31762	0.845221	3.92515	8.67e-05	0.00190367	lincRNA	Up
MSTRG.25213.15	6406.93	1.73216	0.423188	4.09312	4.26e-05	0.00110191	lincRNA	Up
MSTRG.2542.1	86.6641	-3.56036	0.779254	-4.56894	4.9e-06	0.000193451	lincRNA	Down
MSTRG.264.10	1723.84	2.68662	0.673034	3.99181	6.56e-05	0.00153249	lincRNA	Up
MSTRG.26732.11	1541.5	-5.13408	0.696607	-7.37013	1.7e-13	6.43e-11	lincRNA	Down
MSTRG.27069.1	280.987	2.81665	0.79234	3.55485	0.0003782	0.00587586	lincRNA	Up
MSTRG.27852.19	748.263	-1.83817	0.498228	-3.68941	0.000224779	0.00396294	lincRNA	Down
MSTRG.2807.1	32.9286	3.20788	0.905576	3.54236	0.000396561	0.00610268	lincRNA	Up
MSTRG.2807.2	32.1855	3.13711	0.908688	3.45235	0.000555733	0.00788495	lincRNA	Up
MSTRG.28862.1	441.028	3.06856	0.846443	3.62524	0.000288698	0.00476851	lincRNA	Up
MSTRG.29142.1	219.88	6.01481	0.729273	8.24768	1.62e-16	1.46e-13	lincRNA	Up
MSTRG.29675.11	301.215	2.83465	0.814726	3.47927	0.000502785	0.00733379	lincRNA	Up
MSTRG.29696.5	2525.37	3.57194	0.605337	5.90075	3.62e-09	4.56e-07	lincRNA	Up
MSTRG.2972.1	77.9186	4.09683	0.716226	5.72003	1.07e-08	1.15e-06	lincRNA	Up
MSTRG.30711.1	73.9321	3.13629	0.665656	4.71158	2.46e-06	0.000109831	lincRNA	Up
MSTRG.30806.1	158.645	1.80092	0.479566	3.75531	0.000173124	0.00323697	lincRNA	Up
MSTRG.4758.12	435.017	2.82101	0.41638	6.77508	1.24e-11	3.2e-09	lincRNA	Up
MSTRG.5702.10	1062.8	1.30185	0.320036	4.06783	4.75e-05	0.00119686	lincRNA	Up
MSTRG.6425.1	3967.78	-1.80161	0.359739	-5.0081	5.5e-07	3.08e-05	lincRNA	Down
MSTRG.6567.1	783.406	-1.25525	0.368182	-3.40932	0.000651249	0.00884694	lincRNA	Down
MSTRG.6953.3	32827.1	-4.19097	0.883589	-4.74312	2.1e-06	9.6e-05	lincRNA	Down
MSTRG.6953.4	18764.3	-3.79657	0.936758	-4.05288	5.06e-05	0.00125414	lincRNA	Down
MSTRG.7202.1	1134.95	4.12775	0.660116	6.25307	4.02e-10	6.87e-08	lincRNA	Up
MSTRG.7202.2	103.798	3.99147	0.643553	6.20225	5.57e-10	9.03e-08	lincRNA	Up
MSTRG.7531.1	270.836	1.53336	0.41212	3.72067	0.000198696	0.00359492	lincRNA	Up
MSTRG.7883.1	7.15792	-3.20916	0.881504	-3.64056	0.000272051	0.00455383	lincRNA	Down
MSTRG.8515.1	3806.26	5.36791	0.499656	10.7432	6.38e-27	5.17e-23	lincRNA	Up
MSTRG.8576.1	30.3426	-2.31821	0.639316	-3.62607	0.000287767	0.00475798	lincRNA	Down
MSTRG.8838.1	116.489	3.02105	0.770527	3.92076	8.83e-05	0.00193057	lincRNA	Up
MSTRG.970.1	3251.18	-1.44052	0.404003	-3.56562	0.000362997	0.00570524	lincRNA	Down
MSTRG.981.1	167.037	-1.63607	0.472257	-3.46436	0.000531488	0.00761213	lincRNA	Down

## Sheet: Table S4
Overlap_Names	Total	Gene names
OSF-vs-Normal; OSCC-vs-Normal; OSCC-vs-OSF	5	RP11-172F10.1
		RP1-34H18.1
		RP11-276H19.1
		RP11-466L17.1
		RP11-707A18.1
OSF-vs-Normal; OSCC-vs-Normal	42	AC005304.1
		AC007551.3
		AC012370.3
		AC012593.1
		AC017048.1
		AC020601.1
		AC026150.8
		AC133680.1
		LINC00277
		LINC00499
		LINC01011
		MSTRG.18150.1
		MSTRG.20327.1
		MSTRG.21801.1
		MSTRG.23995.1
		MSTRG.264.10
		MSTRG.2972.1
		MSTRG.30806.1
		MSTRG.8515.1
		RP11-1000B6.3
		RP11-111F5.3
		RP11-114G22.1
		RP11-114H21.2
		RP11-153K16.1
		RP11-172F10.1
		RP11-258C19.5
		RP11-276H19.1
		RP11-285B24.1
		RP11-2A4.3
		RP11-345M22.3
		RP11-348J24.2
		RP11-373D23.3
		RP11-378A12.1
		RP11-380D23.2
		RP11-466L17.1
		RP11-682N22.1
		RP11-707A18.1
		RP11-719N22.2
		RP11-790J24.1
		RP11-90C4.1
		RP1-34H18.1
		RP4-734C18.1
OSF-vs-Normal; OSCC-vs-OSF	8	RP11-1082L8.3
		RP11-108M12.3
		RP11-172F10.1
		RP11-276H19.1
		RP11-314N14.1
		RP11-466L17.1
		RP11-707A18.1
		RP1-34H18.1
OSCC-vs-Normal; OSCC-vs-OSF	101	AC007091.1
		AC011891.5
		AC079630.2
		AC090044.1
		AC092684.1
		AC093159.1
		AC093381.2
		AC097499.1
		AC108066.1
		CTA-384D8.34
		CTA-384D8.35
		CTB-151G24.1
		CTC-513N18.7
		CTD-2066L21.1
		CTD-2091N23.1
		CTD-2215E18.3
		CTD-3179P9.1
		CYP4F35P
		FAM66E
		FGF14-IT1
		GS1-122H1.2
		HCG22
		LINC00324
		LINC00460
		LINC00639
		LINC00958
		LINC00968
		LLNLR-249E10.1
		MSTRG.11006.1
		MSTRG.11007.1
		MSTRG.11165.1
		MSTRG.11710.1
		MSTRG.12998.10
		MSTRG.12998.2
		MSTRG.12998.21
		MSTRG.12998.22
		MSTRG.12998.7
		MSTRG.12998.8
		MSTRG.12998.9
		MSTRG.13013.1
		MSTRG.13930.1
		MSTRG.18727.1
		MSTRG.18729.1
		MSTRG.18731.1
		MSTRG.23010.1
		MSTRG.26732.11
		MSTRG.29675.11
		MSTRG.6425.1
		MSTRG.6953.3
		MSTRG.6953.4
		MSTRG.7883.1
		MSTRG.8576.1
		RP11-108K3.2
		RP11-114J13.1
		RP11-133F8.2
		RP11-136K7.2
		RP11-172F10.1
		RP11-217E22.5
		RP11-221N13.3
		RP11-25I15.3
		RP11-274B18.4
		RP11-276H19.1
		RP11-290F20.2
		RP11-292E2.4
		RP11-307P5.1
		RP11-314P15.2
		RP11-340B18.1
		RP11-346D19.1
		RP11-351J23.1
		RP11-351J23.2
		RP11-367F23.2
		RP11-384F7.2
		RP11-388K12.1
		RP11-466L17.1
		RP11-473L15.3
		RP11-475O6.1
		RP11-553L6.5
		RP11-572C15.6
		RP11-608O21.1
		RP11-624A4.1
		RP11-631F7.2
		RP11-647P12.1
		RP11-707A18.1
		RP11-71H9.2
		RP11-757O6.1
		RP11-768G7.2
		RP11-770G2.2
		RP11-774O3.3
		RP11-875H7.5
		RP11-91K9.1
		RP1-193H18.3
		RP11-981G7.2
		RP1-251M9.2
		RP1-34H18.1
		RP3-522D1.1
		RP4-765H13.1
		RP5-836J3.1
		RP5-965F6.2
		RP6-114E22.1
		TPTEP1
		ZNF667-AS1

## Sheet: Table S5-cis-acting.pairs
#lincRNA	mRNA
MIR1302-11	OR4F5
FAM138A	OR4F5
RP11-34P13.7	OR4F5
RP11-34P13.7	AL627309.1
RP11-34P13.8	OR4F5
RP11-34P13.8	AL627309.1
RP11-34P13.9	OR4F5
RP11-34P13.9	AL627309.1
RP4-669L17.10	OR4F29
RP4-669L17.2	OR4F29
RP5-857K21.15	OR4F29
RP5-857K21.1	OR4F16
RP5-857K21.2	OR4F16
RP5-857K21.3	OR4F16
MSTRG.3.2	OR4F16
RP5-857K21.4	OR4F16
MSTRG.3.4	OR4F16
MSTRG.3.5	OR4F16
MSTRG.3.6	OR4F16
MSTRG.3.7	OR4F16
MSTRG.3.9	OR4F16
MSTRG.3.8	OR4F16
RP5-857K21.5	OR4F16
MSTRG.3.10	OR4F16
MSTRG.6.4	OR4F16
MSTRG.6.3	OR4F16
MSTRG.6.5	OR4F16
MSTRG.3.11	OR4F16
MSTRG.7.1	OR4F16
RP11-206L10.3	OR4F16
RP11-206L10.3	AL669831.1
RP11-206L10.5	OR4F16
RP11-206L10.5	AL669831.1
RP11-206L10.2	OR4F16
RP11-206L10.2	AL669831.1
RP11-206L10.9	AL669831.1
FAM87B	AL669831.1
FAM87B	AL645608.2
LINC00115	AL669831.1
LINC00115	AL645608.2
LINC00115	SAMD11
LINC00115	AL645608.1
FAM41C	AL669831.1
FAM41C	AL645608.2
FAM41C	SAMD11
FAM41C	AL645608.1
FAM41C	NOC2L
FAM41C	KLHL17
FAM41C	PLEKHN1
RP11-54O7.16	AL645608.2
RP11-54O7.16	SAMD11
RP11-54O7.16	AL645608.1
RP11-54O7.16	NOC2L
RP11-54O7.16	KLHL17
RP11-54O7.16	PLEKHN1
RP11-54O7.16	C1orf170
RP11-54O7.16	HES4
RP11-54O7.1	AL645608.2
RP11-54O7.1	SAMD11
RP11-54O7.1	AL645608.1
RP11-54O7.1	NOC2L
RP11-54O7.1	KLHL17
RP11-54O7.1	PLEKHN1
RP11-54O7.1	C1orf170
RP11-54O7.1	HES4
RP11-54O7.2	AL645608.2
RP11-54O7.2	SAMD11
RP11-54O7.2	AL645608.1
RP11-54O7.2	NOC2L
RP11-54O7.2	KLHL17
RP11-54O7.2	PLEKHN1
RP11-54O7.2	C1orf170
RP11-54O7.2	HES4
RP11-54O7.2	ISG15
RP11-54O7.3	AL645608.2
RP11-54O7.3	SAMD11
RP11-54O7.3	AL645608.1
RP11-54O7.3	NOC2L
RP11-54O7.3	KLHL17
RP11-54O7.3	PLEKHN1
RP11-54O7.3	C1orf170
RP11-54O7.3	HES4
RP11-54O7.3	ISG15
RP11-54O7.17	SAMD11
RP11-54O7.17	AL645608.1
RP11-54O7.17	NOC2L
RP11-54O7.17	KLHL17
RP11-54O7.17	PLEKHN1
RP11-54O7.17	C1orf170
RP11-54O7.17	HES4
RP11-54O7.17	ISG15
RP11-54O7.17	AGRN
RP11-54O7.17	RNF223
RP11-54O7.17	C1orf159
RP11-54O7.18	KLHL17
RP11-54O7.18	PLEKHN1
RP11-54O7.18	C1orf170
RP11-54O7.18	HES4
RP11-54O7.18	ISG15
RP11-54O7.18	AGRN
RP11-54O7.18	RNF223
RP11-54O7.18	C1orf159
RP11-465B22.5	AGRN
RP11-465B22.5	RNF223
RP11-465B22.5	C1orf159
RP11-465B22.5	TTLL10
RP11-465B22.5	TNFRSF18
RP11-465B22.5	TNFRSF4
RP11-465B22.5	SDF4
RP11-465B22.5	B3GALT6
RP11-465B22.8	RNF223
RP11-465B22.8	C1orf159
RP11-465B22.8	TTLL10
RP11-465B22.8	TNFRSF18
RP11-465B22.8	TNFRSF4
RP11-465B22.8	SDF4
RP11-465B22.8	B3GALT6
RP11-465B22.8	FAM132A
RP11-465B22.8	UBE2J2
RP5-902P8.12	TTLL10
RP5-902P8.12	TNFRSF18
RP5-902P8.12	TNFRSF4
RP5-902P8.12	SDF4
RP5-902P8.12	B3GALT6
RP5-902P8.12	FAM132A
RP5-902P8.12	UBE2J2
RP5-902P8.12	SCNN1D
RP5-902P8.12	ACAP3
RP5-902P8.12	PUSL1
RP5-902P8.12	CPSF3L
RP5-902P8.12	GLTPD1
RP5-902P8.12	TAS1R3
RP5-902P8.12	DVL1
RP5-902P8.10	TTLL10
RP5-902P8.10	TNFRSF18
RP5-902P8.10	TNFRSF4
RP5-902P8.10	SDF4
RP5-902P8.10	B3GALT6
RP5-902P8.10	FAM132A
RP5-902P8.10	UBE2J2
RP5-902P8.10	SCNN1D
RP5-902P8.10	ACAP3
RP5-902P8.10	PUSL1
RP5-902P8.10	CPSF3L
RP5-902P8.10	GLTPD1
RP5-902P8.10	TAS1R3
RP5-902P8.10	DVL1
RP5-902P8.10	MXRA8
RP5-902P8.10	AURKAIP1
RP4-758J18.13	PUSL1
RP4-758J18.13	CPSF3L
RP4-758J18.13	GLTPD1
RP4-758J18.13	TAS1R3
RP4-758J18.13	DVL1
RP4-758J18.13	MXRA8
RP4-758J18.13	AURKAIP1
RP4-758J18.13	CCNL2
RP4-758J18.13	RP4-758J18.2
RP4-758J18.13	MRPL20
RP4-758J18.13	ANKRD65
RP4-758J18.13	TMEM88B
RP4-758J18.13	VWA1
RP4-758J18.13	ATAD3C
RP4-758J18.13	ATAD3B
RP4-758J18.10	TAS1R3
RP4-758J18.10	DVL1
RP4-758J18.10	MXRA8
RP4-758J18.10	AURKAIP1
RP4-758J18.10	CCNL2
RP4-758J18.10	RP4-758J18.2
RP4-758J18.10	MRPL20
RP4-758J18.10	ANKRD65
RP4-758J18.10	TMEM88B
RP4-758J18.10	VWA1
RP4-758J18.10	ATAD3C
RP4-758J18.10	ATAD3B
RP4-758J18.10	ATAD3A
RP11-181G12.5	PRKCZ
RP11-181G12.5	C1orf86
RP11-181G12.5	AL590822.2
RP11-181G12.5	AL590822.1
RP11-181G12.5	SKI
RP11-181G12.4	PRKCZ
RP11-181G12.4	C1orf86
RP11-181G12.4	AL590822.2
RP11-181G12.4	AL590822.1
RP11-181G12.4	SKI
RP3-395M20.12	PLCH2
RP3-395M20.12	PANK4
RP3-395M20.12	HES5
RP3-395M20.12	TNFRSF14
RP3-395M20.12	FAM213B
RP3-395M20.12	MMEL1
RP3-395M20.12	TTC34
RP11-740P5.2	TTC34
RP11-740P5.3	TTC34
RP11-22L13.1	PRDM16
RP11-168F9.2	PRDM16
RP11-168F9.2	ARHGEF16
RP11-168F9.2	MEGF6
RP13-15E13.1	CEP104
RP13-15E13.1	DFFB
RP13-15E13.1	C1orf174
RP1-37J18.2	AJAP1
RP11-242F24.1	THAP3
RP11-242F24.1	DNAJC11
RP11-242F24.1	CAMTA1
RP11-338N10.1	CAMTA1
RP11-338N10.1	VAMP3
RP11-338N10.1	PER3
RP11-338N10.2	CAMTA1
RP11-338N10.2	VAMP3
RP11-338N10.2	PER3
RP11-338N10.3	CAMTA1
RP11-338N10.3	VAMP3
RP11-338N10.3	PER3
MSTRG.78.1	CAMTA1
MSTRG.78.1	VAMP3
MSTRG.78.1	PER3
MSTRG.78.1	UTS2
MSTRG.78.1	TNFRSF9
RP11-431K24.1	ERRFI1
RP11-431K24.4	SLC45A1
RP4-633I8.4	RERE
RP4-633I8.4	ENO1
RP3-510D11.1	GPR157
RP3-510D11.1	H6PD
RP3-510D11.2	GPR157
RP3-510D11.2	H6PD
RP13-392I16.1	SLC25A33
RP13-392I16.1	TMEM201
MSTRG.118.1	CTNNBIP1
MSTRG.118.1	LZIC
MSTRG.118.1	NMNAT1
MSTRG.118.1	RBP7
RP1-69M21.2	PTCHD2
RP1-69M21.2	FBXO2
RP1-69M21.2	FBXO44
RP1-69M21.2	FBXO6
RP1-69M21.2	MAD2L2
RP1-69M21.2	DRAXIN
RP5-888M10.2	VPS13D
RP5-888M10.2	DHRS3
RP11-474O21.5	DHRS3
RP11-474O21.5	AADACL4
RP11-474O21.5	AADACL3
RP5-845O24.8	AADACL3
RP5-845O24.8	C1orf158
RP5-845O24.8	PRAMEF12
RP5-845O24.8	PRAMEF1
RP5-845O24.8	PRAMEF11
RP5-845O24.8	HNRNPCL1
RP5-845O24.8	PRAMEF2
RP5-845O24.8	PRAMEF4
RP5-845O24.8	PRAMEF10
RP5-845O24.8	PRAMEF7
RP13-221M14.2	PRAMEF6
RP13-221M14.2	WI2-3308P17.2
RP13-221M14.2	PRAMEF26
RP11-219C24.10	PRAMEF3
RP11-219C24.10	PRAMEF5
RP11-219C24.10	PRAMEF8
RP11-219C24.10	PRAMEF9
RP11-219C24.10	PRAMEF13
RP11-219C24.10	PRAMEF18
RP11-219C24.10	PRAMEF16
RP11-219C24.10	PRAMEF21
CTA-520D8.2	PDPN
CTA-520D8.2	PRDM2
RP3-467K16.4	FHAD1
RP3-467K16.4	EFHD2
RP3-467K16.4	CTRC
RP3-467K16.4	CELA2A
RP3-467K16.4	CELA2B
RP3-467K16.4	CASP9
RP4-680D5.9	DNAJC16
RP4-680D5.9	AGMAT
RP4-680D5.9	DDI2
RP4-680D5.9	RSC1A1
RP4-680D5.9	PLEKHM2
RP4-680D5.9	SLC25A34
RP4-680D5.9	TMEM82
RP4-680D5.9	FBLIM1
RP4-798A10.2	SZRD1
RP4-798A10.2	SPATA21
RP4-798A10.2	NECAP2
RP4-798A10.2	AL355149.2
MSTRG.227.2	SPATA21
MSTRG.227.2	NECAP2
MSTRG.227.2	AL355149.2
MSTRG.227.2	NBPF1
MSTRG.227.1	AL355149.2
MSTRG.227.1	NBPF1
RP4-798A10.7	AL355149.2
RP4-798A10.7	NBPF1
RP4-798A10.4	AL355149.2
RP4-798A10.4	NBPF1
RP5-1182A14.5	AL355149.2
RP5-1182A14.5	NBPF1
RP5-1182A14.5	AL137798.1
CROCCP2	NBPF1
CROCCP2	AL137798.1
MSTRG.249.2	CROCC
MSTRG.249.1	CROCC
RP11-108M9.1	CROCC
RP11-108M9.2	CROCC
RP11-108M9.4	CROCC
RP11-108M9.4	MFAP2
RP11-108M9.4	ATP13A2
RP11-108M9.6	CROCC
RP11-108M9.6	MFAP2
RP11-108M9.6	ATP13A2
RP11-380J14.1	PADI2
RP11-380J14.1	PADI1
RP11-380J14.1	PADI3
RP11-473A10.2	ARHGEF10L
RP11-473A10.2	ACTL8
RP11-174G17.2	IGSF21
RP11-422P22.1	IGSF21
RP11-422P22.1	KLHDC7A
MSTRG.264.10	TAS1R2
MSTRG.264.10	RP13-279N23.2
MSTRG.264.10	ALDH4A1
MSTRG.264.10	IFFO2
RP3-340N1.2	PLA2G5
RP3-340N1.2	PLA2G2D
RP3-340N1.2	PLA2G2F
RP3-340N1.2	PLA2G2C
RP3-340N1.2	UBXN10
RP3-340N1.6	PLA2G2F
RP3-340N1.6	PLA2G2C
RP3-340N1.6	UBXN10
RP3-340N1.6	VWA5B1
RP4-749H3.1	VWA5B1
RP4-749H3.2	VWA5B1
RP4-749H3.2	CAMK2N1
RP4-749H3.2	MUL1
RP11-293F5.1	ECE1
RP11-293F5.1	NBPF3
RP11-293F5.1	ALPL
RP1-224A6.3	HSPG2
RP1-224A6.3	CELA3B
RP1-224A6.3	CELA3A
RP1-224A6.3	CDC42
RP1-224A6.3	WNT4
LINC00339	HSPG2
LINC00339	CELA3B
LINC00339	CELA3A
LINC00339	CDC42
LINC00339	WNT4
RP1-224A6.9	CELA3A
RP1-224A6.9	CDC42
RP1-224A6.9	WNT4
RP1-74M1.3	EPHB2
RP1-74M1.3	LACTBL1
RP1-74M1.3	C1orf234
RP5-1057J7.6	HTR1D
RP5-1057J7.6	HNRNPR
RP5-1057J7.6	ZNF436
RP5-1057J7.6	C1orf213
RP5-1057J7.6	TCEA3
MSTRG.333.10	HNRNPR
MSTRG.333.10	ZNF436
MSTRG.333.10	C1orf213
MSTRG.333.10	TCEA3
RP5-1057J7.7	HNRNPR
RP5-1057J7.7	ZNF436
RP5-1057J7.7	C1orf213
RP5-1057J7.7	TCEA3
RP5-1057J7.7	ASAP3
RP1-150O5.3	ASAP3
RP1-150O5.3	E2F2
RP1-150O5.3	ID3
RP1-150O5.3	MDS2
RP11-10N16.2	MYOM3
RP11-10N16.2	IL22RA1
RP11-10N16.2	IFNLR1
RP4-594I10.3	NIPAL3
RP4-594I10.3	RCAN3
RP4-594I10.3	NCMAP
RP4-594I10.3	SRRM1
RP11-84D1.2	RUNX3
RP3-465N24.6	SYF2
RP3-465N24.6	C1orf63
RP3-465N24.6	RHD
RP3-465N24.6	TMEM50A
RP11-70P17.1	TMEM57
RP11-70P17.1	LDLRAP1
RP11-70P17.1	MAN1C1
RP4-752I6.1	MAP3K6
RP4-752I6.1	FCN3
RP4-752I6.1	CD164L2
RP4-752I6.1	GPR3
RP4-752I6.1	WASF2
RP4-752I6.1	AHDC1
RP11-288L9.1	AHDC1
RP11-288L9.1	FGR
RP11-288L9.1	IFI6
RP11-288L9.1	FAM76A
RP5-1092A3.5	PTAFR
RP5-1092A3.5	DNAJC8
RP5-1092A3.5	AL353354.1
RP5-1092A3.5	AL353354.2
RP5-1092A3.5	ATPIF1
RP5-1092A3.5	SESN2
RP5-1092A3.5	MED18
MSTRG.464.1	PHACTR4
MSTRG.464.1	RCC1
MSTRG.464.1	TRNAU1AP
MSTRG.464.2	PHACTR4
MSTRG.464.2	RCC1
MSTRG.464.2	TRNAU1AP
MSTRG.464.2	TAF12
MSTRG.464.2	RAB42
MSTRG.466.10	PHACTR4
MSTRG.466.10	RCC1
MSTRG.466.10	TRNAU1AP
MSTRG.466.10	TAF12
MSTRG.466.10	RAB42
RP11-442N24__B.1	TRNAU1AP
RP11-442N24__B.1	TAF12
RP11-442N24__B.1	RAB42
RP11-442N24__B.1	GMEB1
RP11-442N24__B.1	YTHDF2
RNU11	TRNAU1AP
RNU11	TAF12
RNU11	RAB42
RNU11	GMEB1
RNU11	YTHDF2
RP1-212P9.2	OPRD1
RP1-212P9.2	EPB41
RP11-242O24.3	EPB41
RP11-242O24.3	TMEM200B
RP11-242O24.3	SRSF4
RP11-242O24.3	MECR
RP11-242O24.3	PTPRU
RP3-437I16.1	PTPRU
RP5-1125N11.1	MATN1
RP5-1125N11.1	LAPTM5
RP5-1125N11.1	SDC3
RP1-65J11.1	LAPTM5
RP1-65J11.1	SDC3
RP11-439L8.3	SERINC2
RP11-439L8.3	AC114494.1
RP11-439L8.3	TINAGL1
RP11-439L8.4	SERINC2
RP11-439L8.4	AC114494.1
RP11-439L8.4	TINAGL1
RP11-439L8.4	HCRTR1
RP11-84A19.2	BAI2
RP11-84A19.2	SPOCD1
RP11-84A19.2	PTP4A2
RP11-84A19.2	AL136115.1
RP11-84A19.4	PTP4A2
RP11-84A19.4	AL136115.1
RP4-534N18.2	PTP4A2
RP4-534N18.2	AL136115.1
RP4-534N18.2	KHDRBS1
RP4-811H24.9	LCK
RP4-811H24.9	HDAC1
RP4-811H24.9	MARCKSL1
RP4-811H24.9	TSSK3
RP4-811H24.9	FAM229A
RP4-811H24.9	BSDC1
RP11-415J8.7	TRIM62
RP11-415J8.7	ZNF362
RP11-415J8.7	A3GALT2
RP11-415J8.7	PHC2
RP4-789D17.5	AGO4
RP4-789D17.5	AGO1
RP4-789D17.5	AGO3
RP5-884C9.2	UTP11L
RP5-884C9.2	POU3F1
RP4-739H11.3	RIMS3
RP4-739H11.3	NFYC
RP11-399E6.1	SCMH1
RP5-994D16.3	CCDC30
RP5-994D16.3	PPIH
RP5-994D16.3	YBX1
RP5-994D16.3	CLDN19
RP5-994D16.3	LEPRE1
RP5-994D16.3	C1orf50
SLC2A1-AS1	SLC2A1
RP5-1198O20.4	SLC6A9
RP5-1198O20.4	KLF17
MSTRG.758.15	NASP
MSTRG.758.15	CCDC17
MSTRG.758.15	GPBP1L1
MSTRG.758.15	TMEM69
MSTRG.758.15	IPP
RP5-1109J22.2	NSUN4
RP5-1109J22.2	FAAH
RP5-1109J22.2	DMBX1
RP5-1109J22.2	KNCN
LINC00505	FAAH
LINC00505	DMBX1
LINC00505	KNCN
CYP4A22-AS1	CYP4Z1
CYP4A22-AS1	CYP4A22
CYP4A22-AS1	PDZK1IP1
RP11-543D5.1	TRABD2B
RP11-543D5.1	FLJ00388
RP11-543D5.2	TRABD2B
RP11-543D5.2	FLJ00388
RP11-330M19.1	TRABD2B
RP11-330M19.1	FLJ00388
RP4-683M8.2	TRABD2B
RP4-683M8.2	AL109659.1
RP11-193P11.3	TRABD2B
RP11-193P11.3	AL109659.1
RP5-1024N4.2	SLC5A9
RP5-1024N4.2	SPATA6
RP5-850O15.4	DMRTA2
RP5-850O15.4	FAF1
RP11-296A18.3	C1orf185
RP11-296A18.3	RNF11
RP11-296A18.3	TTC39A
RP11-25O10.2	ZCCHC11
RP11-25O10.2	GPX7
RP11-25O10.2	FAM159A
RP5-1024G6.8	CPT2
RP5-1024G6.8	C1orf123
RP5-1024G6.8	MAGOH
RP5-1024G6.8	LRP8
RP4-784A16.5	MAGOH
RP4-784A16.5	LRP8
RP11-117D22.1	LRP8
RP11-117D22.2	LRP8
RP11-117D22.2	DMRTB1
RP4-758J24.5	HSPB11
RP4-758J24.5	LRRC42
RP4-758J24.5	LDLRAD1
RP4-758J24.5	TMEM59
RP4-758J24.5	TCEANC2
RP4-758J24.5	AL161915.1
RP4-705F19.1	SSBP3
RP5-866L20.1	ACOT11
RP5-866L20.1	FAM151A
RP11-101C11.1	USP24
RP4-710M16.2	PPAP2B
RP6-102O10.1	DAB1
RP11-393I23.4	DAB1
RP11-63G10.3	JUN
RP11-63G10.2	JUN
RP11-467C18.1	FGGY
RP4-782L23.1	FGGY
RP4-782L23.1	HOOK1
RP11-575B7.3	C1orf87
MSTRG.970.1	NFIA
RP5-833A20.1	NFIA
MSTRG.981.1	NFIA
RP11-430G17.3	TM2D1
RP11-430G17.3	INADL
MSTRG.990.1	INADL
RP4-771M4.3	ATG4C
RP11-182I10.3	JAK1
RP4-535B20.4	JAK1
RP4-535B20.1	AK4
MSTRG.1089.3	RPE65
MSTRG.1089.3	DEPDC1
RP11-42O15.3	ANKRD13C
RP11-42O15.3	HHLA3
RP11-42O15.3	CTH
RP11-17E13.2	C1orf173
RP11-17E13.2	CRYZ
RP11-17E13.2	TYW3
RP11-510C10.4	LHX8
RP11-510C10.4	SLC44A5
RP11-550H2.1	ASB17
RP11-550H2.1	ST6GALNAC3
RP11-550H2.2	ST6GALNAC3
RP5-1102E8.3	ST6GALNAC3
MSTRG.1183.1	LPHN2
RP5-836J3.1	TTLL7
RP11-486G15.2	TTLL7
RP11-486G15.2	PRKACB
RP11-131L23.2	DDAH1
RP11-290M5.4	DDAH1
RP11-290M5.4	CYR61
RP11-290M5.4	ZNHIT6
RP11-290M5.2	DDAH1
RP11-290M5.2	CYR61
RP11-290M5.2	ZNHIT6
RP4-604K5.3	2018-09-15
RP4-604K5.3	HS2ST1
RP4-604K5.3	RP5-1052I5.2
RP5-1052I5.1	HS2ST1
RP5-1052I5.1	RP5-1052I5.2
RP4-544H6.2	LMO4
MSTRG.1232.1	GBP5
MSTRG.1232.1	GBP4
RP5-943J3.2	LRRC8C
RP5-943J3.2	RP11-302M6.4
RP5-943J3.2	LRRC8D
MSTRG.1253.1	RP11-302M6.4
MSTRG.1253.1	LRRC8D
RP11-302M6.5	RP11-302M6.4
RP11-302M6.5	LRRC8D
RP11-302M6.5	ZNF326
RP4-665J23.2	ZNF644
RP4-665J23.4	ZNF644
RP4-621B10.8	BTBD8
RP4-621B10.8	KIAA1107
RP4-621B10.8	C1orf146
RP4-621B10.8	GLMN
RP4-561L24.3	BCAR3
RP4-561L24.3	DNTTIP2
RP4-561L24.3	GCLM
RP11-148B18.1	ARHGAP29
RP11-148B18.4	ARHGAP29
RP11-148B18.4	ABCD3
RP11-148B18.3	ARHGAP29
RP11-148B18.3	ABCD3
RP11-86H7.6	ABCD3
RP11-86H7.6	F3
RP11-86H7.7	F3
RP4-586O15.1	RP11-57H12.6
RP4-586O15.1	RWDD3
RP11-272L13.3	DPYD
RP11-490G2.2	DPYD
RP5-837M10.2	DBT
RP5-837M10.2	RTCA
RP5-837M10.2	CDC14A
RP11-84O12.4	GPR88
RP11-84O12.4	VCAM1
RP11-411H5.1	OLFM3
RP11-356N1.2	SLC25A24
RP11-483I13.2	SLC25A24
RP11-483I13.2	NBPF4
RP11-131J3.1	NBPF6
MSTRG.1406.3	WDR47
MSTRG.1406.3	TAF13
MSTRG.1406.3	TMEM167B
MSTRG.1406.3	C1orf194
MSTRG.1406.3	KIAA1324
SCARNA2	WDR47
SCARNA2	TAF13
SCARNA2	TMEM167B
SCARNA2	C1orf194
SCARNA2	KIAA1324
RP4-735C1.6	GSTM5
RP4-735C1.6	CSF1
RP11-195M16.3	CSF1
RP11-195M16.3	AHCYL1
RP11-470L19.2	SLC16A4
RP11-470L19.2	LAMTOR5
RP11-470L19.2	PROK1
RP11-470L19.2	KCNA10
RP11-284N8.3	KCNA2
RP11-284N8.3	KCNA3
RP5-836N10.1	ADORA3
RP5-836N10.1	RAP1A
RP5-836N10.1	FAM212B
MSTRG.1464.1	RAP1A
MSTRG.1464.1	FAM212B
RP11-88H9.2	KCND3
RP11-426L16.8	SLC16A1
RP3-522D1.1	SLC16A1
RP11-389O22.1	SLC16A1
RP11-389O22.1	LRIG2
RP11-31F15.2	LRIG2
RP4-666F24.3	TSHB
RP4-666F24.3	TSPAN2
RP11-12L8.1	NHLH2
RP11-12L8.1	SLC22A15
RP5-1185H19.2	SLC22A15
RP5-1185H19.2	MAB21L3
RP4-655J12.4	ATP1A1
RP4-655J12.4	AL136376.1
RP4-655J12.4	CD58
RP4-655J12.5	ATP1A1
RP4-655J12.5	AL136376.1
RP4-655J12.5	CD58
RP5-1086K13.1	ATP1A1
RP5-1086K13.1	CD58
RP5-1086K13.1	IGSF3
RP4-753F5.1	PTGFRN
RP4-753F5.1	CD101
RP11-39H13.1	MAN1A2
RP11-188D8.1	MAN1A2
RP4-712E4.1	TBX15
RP4-712E4.1	WARS2
RP4-712E4.2	TBX15
RP4-712E4.2	WARS2
RP5-834N19.1	HSD3B2
RP11-114O18.1	NOTCH2
RP11-439A17.4	FAM72B
RP11-439A17.4	FCGR1B
RP6-206I17.2	PPIAL4G
RP6-206I17.3	PPIAL4G
RP11-289H16.1	NBPF8
LINC00623	AL592284.1
LINC00623	PPIAL4B
MSTRG.1639.1	NBPF9
MSTRG.1640.1	NBPF9
RP11-458D21.6	NOTCH2NL
RP11-458D21.6	RP11-458D21.5
RP11-458D21.6	NBPF10
MSTRG.1668.1	NOTCH2NL
MSTRG.1668.1	RP11-458D21.5
MSTRG.1668.1	NBPF10
MSTRG.1668.1	HFE2
MSTRG.1665.20	NOTCH2NL
MSTRG.1665.20	RP11-458D21.5
MSTRG.1665.20	NBPF10
MSTRG.1665.20	HFE2
MSTRG.1669.1	NOTCH2NL
MSTRG.1669.1	RP11-458D21.5
MSTRG.1669.1	NBPF10
MSTRG.1669.1	HFE2
MSTRG.1670.1	NOTCH2NL
MSTRG.1670.1	RP11-458D21.5
MSTRG.1670.1	NBPF10
MSTRG.1670.1	HFE2
RP11-458D21.1	NOTCH2NL
RP11-458D21.1	RP11-458D21.5
RP11-458D21.1	NBPF10
RP11-458D21.1	HFE2
RP11-458D21.1	TXNIP
RP11-458D21.1	POLR3GL
RP11-458D21.1	ANKRD34A
RP11-94I2.4	GPR89C
RP11-94I2.4	NBPF11
MSTRG.1680.1	NBPF11
RP4-704D21.2	NBPF12
LINC00624	BCL9
RP11-533N14.3	BCL9
RP11-533N14.3	ACP6
RP11-533N14.3	GJA5
RP11-433J22.3	GJA5
RP6-74O6.2	GPR89B
MSTRG.1719.1	NBPF24
MSTRG.1719.1	BX842679.1
XXyac-YX155B6.7	NBPF24
RP6-74O6.3	NBPF24
XXyac-YX155B6.5	NBPF24
XXyac-YX155B6.5	BX842679.1
XXyac-YX155B6.6	NBPF24
XXyac-YX155B6.6	BX842679.1
RP11-89F3.2	NBPF20
MSTRG.1765.1	NBPF20
RP11-666A1.5	NBPF15
RP11-763B22.4	NBPF16
RP11-763B22.6	NBPF16
RP11-403I13.9	HIST2H3PS2
RP5-998N21.4	HIST2H3PS2
RP5-998N21.4	FAM72C
RP11-277L2.4	PPIAL4C
RP11-277L2.3	PPIAL4C
RP11-277L2.3	AL358813.2
RP11-277L2.5	PPIAL4C
RP11-277L2.5	AL358813.2
RP11-353N4.1	PPIAL4C
RP11-353N4.1	AL358813.2
RP11-353N4.5	AL358813.2
RP11-353N4.4	AL358813.2
RP11-353N4.4	FCGR1A
RP11-353N4.4	HIST2H2BF
RP11-196G18.24	FCGR1A
RP11-196G18.24	HIST2H2BF
RP11-196G18.24	HIST2H3D
RP11-196G18.24	HIST2H4A
RP11-196G18.24	HIST2H3C
RP11-196G18.24	HIST2H2AA3
RP11-196G18.24	HIST2H2AA4
RP11-196G18.24	HIST2H3A
RP11-196G18.24	HIST2H4B
RP11-196G18.24	HIST2H2BE
RP11-196G18.24	HIST2H2AC
RP11-196G18.24	HIST2H2AB
RP11-196G18.24	BOLA1
RP11-196G18.24	SV2A
RP11-196G18.24	SF3B4
RP11-196G18.24	MTMR11
RP11-196G18.24	OTUD7B
LINC00568	RPRD2
LINC00568	TARS2
LINC00568	ECM1
LINC00568	ADAMTSL4
LINC00568	AL356356.1
LINC00568	ADAMTSL4-AS1
LINC00568	MCL1
LINC00568	ENSA
RP11-126K1.9	PIP5K1A
RP11-126K1.9	PSMD4
RP11-126K1.9	RP11-126K1.2
RP11-126K1.9	ZNF687
RP11-126K1.9	PI4KB
RP11-126K1.9	RFX5
RP11-126K1.9	SELENBP1
RP11-126K1.9	PSMB4
RP11-126K1.9	POGZ
RP11-98D18.17	SNX27
RP11-98D18.17	CELF3
RP11-98D18.17	RIIAD1
RP11-98D18.17	AL589765.1
RP11-98D18.17	MRPL9
RP11-98D18.17	OAZ3
RP11-98D18.17	TDRKH
RP11-98D18.17	LINGO4
RP11-98D18.17	RORC
RP11-98D18.17	C2CD4D
RP11-98D18.17	THEM5
RP11-98D18.17	THEM4
RP11-107M16.2	TCHH
RP11-107M16.2	RPTN
RP11-107M16.2	HRNR
RP11-107M16.2	FLG
MSTRG.1895.1	RPTN
MSTRG.1895.1	HRNR
MSTRG.1895.1	FLG
MSTRG.1904.1	LCE5A
MSTRG.1904.1	CRCT1
MSTRG.1904.1	LCE3E
MSTRG.1904.1	LCE3D
MSTRG.1904.2	LCE5A
MSTRG.1904.2	CRCT1
MSTRG.1904.2	LCE3E
MSTRG.1904.2	LCE3D
MSTRG.1906.1	LCE5A
MSTRG.1906.1	CRCT1
MSTRG.1906.1	LCE3E
MSTRG.1906.1	LCE3D
MSTRG.1906.1	LCE3C
MSTRG.1906.1	LCE3B
MSTRG.1907.1	LCE5A
MSTRG.1907.1	CRCT1
MSTRG.1907.1	LCE3E
MSTRG.1907.1	LCE3D
MSTRG.1907.1	LCE3C
MSTRG.1907.1	LCE3B
MSTRG.1907.1	LCE3A
MSTRG.1907.1	LCE2D
MSTRG.1909.2	LCE3D
MSTRG.1909.2	LCE3C
MSTRG.1909.2	LCE3B
MSTRG.1909.2	LCE3A
MSTRG.1909.2	LCE2D
MSTRG.1909.2	LCE2B
MSTRG.1909.2	LCE2C
MSTRG.1909.2	LCE2A
MSTRG.1909.2	LCE4A
MSTRG.1909.2	C1orf68
LINC00302	LCE3D
LINC00302	LCE3C
LINC00302	LCE3B
LINC00302	LCE3A
LINC00302	LCE2D
LINC00302	LCE2B
LINC00302	LCE2C
LINC00302	LCE2A
LINC00302	LCE4A
LINC00302	C1orf68
MSTRG.1909.8	LCE3C
MSTRG.1909.8	LCE3B
MSTRG.1909.8	LCE3A
MSTRG.1909.8	LCE2D
MSTRG.1909.8	LCE2B
MSTRG.1909.8	LCE2C
MSTRG.1909.8	LCE2A
MSTRG.1909.8	LCE4A
MSTRG.1909.8	C1orf68
MSTRG.1909.8	KPRP
MSTRG.1909.8	LCE1F
MSTRG.1909.8	LCE1E
MSTRG.1933.1	C1orf68
MSTRG.1933.1	KPRP
MSTRG.1933.1	LCE1F
MSTRG.1933.1	LCE1E
MSTRG.1933.1	LCE1D
MSTRG.1933.1	LCE1C
MSTRG.1933.1	LCE1B
MSTRG.1933.1	LCE1A
MSTRG.1933.1	LCE6A
MSTRG.1933.1	SMCP
MSTRG.1933.1	IVL
MSTRG.1963.1	SPRR4
MSTRG.1963.1	SPRR1A
MSTRG.1963.1	SPRR3
MSTRG.1963.1	SPRR1B
MSTRG.1963.1	SPRR2D
MSTRG.1963.2	SPRR4
MSTRG.1963.2	SPRR1A
MSTRG.1963.2	SPRR3
MSTRG.1963.2	SPRR1B
MSTRG.1963.2	SPRR2D
MSTRG.1963.2	SPRR2A
MSTRG.1963.4	SPRR4
MSTRG.1963.4	SPRR1A
MSTRG.1963.4	SPRR3
MSTRG.1963.4	SPRR1B
MSTRG.1963.4	SPRR2D
MSTRG.1963.4	SPRR2A
MSTRG.1963.4	SPRR2B
MSTRG.1963.6	SPRR4
MSTRG.1963.6	SPRR1A
MSTRG.1963.6	SPRR3
MSTRG.1963.6	SPRR1B
MSTRG.1963.6	SPRR2D
MSTRG.1963.6	SPRR2A
MSTRG.1963.6	SPRR2B
MSTRG.1963.7	SPRR4
MSTRG.1963.7	SPRR1A
MSTRG.1963.7	SPRR3
MSTRG.1963.7	SPRR1B
MSTRG.1963.7	SPRR2D
MSTRG.1963.7	SPRR2A
MSTRG.1963.7	SPRR2B
MSTRG.1963.7	SPRR2E
MSTRG.1965.8	SPRR4
MSTRG.1965.8	SPRR1A
MSTRG.1965.8	SPRR3
MSTRG.1965.8	SPRR1B
MSTRG.1965.8	SPRR2D
MSTRG.1965.8	SPRR2A
MSTRG.1965.8	SPRR2B
MSTRG.1965.8	SPRR2E
MSTRG.1965.8	SPRR2F
MSTRG.1965.11	SPRR4
MSTRG.1965.11	SPRR1A
MSTRG.1965.11	SPRR3
MSTRG.1965.11	SPRR1B
MSTRG.1965.11	SPRR2D
MSTRG.1965.11	SPRR2A
MSTRG.1965.11	SPRR2B
MSTRG.1965.11	SPRR2E
MSTRG.1965.11	SPRR2F
MSTRG.1968.25	SPRR4
MSTRG.1968.25	SPRR1A
MSTRG.1968.25	SPRR3
MSTRG.1968.25	SPRR1B
MSTRG.1968.25	SPRR2D
MSTRG.1968.25	SPRR2A
MSTRG.1968.25	SPRR2B
MSTRG.1968.25	SPRR2E
MSTRG.1968.25	SPRR2F
MSTRG.1968.25	SPRR2G
MSTRG.1968.23	SPRR2D
MSTRG.1968.23	SPRR2A
MSTRG.1968.23	SPRR2B
MSTRG.1968.23	SPRR2E
MSTRG.1968.23	SPRR2F
MSTRG.1968.23	SPRR2G
MSTRG.1968.24	SPRR2A
MSTRG.1968.24	SPRR2B
MSTRG.1968.24	SPRR2E
MSTRG.1968.24	SPRR2F
MSTRG.1968.24	SPRR2G
MSTRG.1968.26	SPRR2A
MSTRG.1968.26	SPRR2B
MSTRG.1968.26	SPRR2E
MSTRG.1968.26	SPRR2F
MSTRG.1968.26	SPRR2G
MSTRG.1968.27	SPRR2A
MSTRG.1968.27	SPRR2B
MSTRG.1968.27	SPRR2E
MSTRG.1968.27	SPRR2F
MSTRG.1968.27	SPRR2G
MSTRG.1968.32	SPRR2A
MSTRG.1968.32	SPRR2B
MSTRG.1968.32	SPRR2E
MSTRG.1968.32	SPRR2F
MSTRG.1968.32	SPRR2G
RP1-140J1.1	SPRR2B
RP1-140J1.1	SPRR2E
RP1-140J1.1	SPRR2F
RP1-140J1.1	SPRR2G
RP1-140J1.1	LELP1
RP1-140J1.1	PRR9
RP1-140J1.1	LOR
RP11-422P24.11	GATAD2B
RP11-422P24.11	DENND4B
RP11-422P24.11	CRTC2
RP11-422P24.11	SLC39A1
RP11-422P24.11	CREB3L4
RP11-422P24.11	JTB
RP11-422P24.11	RAB13
RP11-422P24.11	RPS27
RP11-422P24.11	NUP210L
MSTRG.1998.2	NUP210L
MSTRG.1998.2	TPM3
MSTRG.1998.2	C1orf189
MSTRG.1998.2	C1orf43
MSTRG.1998.2	UBAP2L
MSTRG.1998.2	HAX1
RP11-307C12.13	KCNN3
RP11-307C12.13	PMVK
RP11-307C12.13	PBXIP1
RP11-307C12.13	PYGO2
RP11-307C12.13	SHC1
RP11-307C12.13	FLAD1
RP11-307C12.13	LENEP
RP11-307C12.13	ZBTB7B
RP11-307C12.13	DCST2
RP11-307C12.13	DCST1
RP11-139I14.2	C1orf85
RP11-139I14.2	VHLL
RP11-139I14.2	CCT3
RP11-139I14.2	TSACC
RP11-139I14.2	RHBG
RP11-139I14.2	C1orf61
RP11-139I14.2	MEF2D
RP11-98G7.1	CCT3
RP11-98G7.1	RHBG
RP11-98G7.1	C1orf61
RP11-98G7.1	MEF2D
RP11-98G7.1	IQGAP3
RP11-284F21.8	C1orf61
RP11-284F21.8	MEF2D
RP11-284F21.8	IQGAP3
RP11-284F21.8	TTC24
RP11-284F21.8	APOA1BP
RP11-284F21.8	GPATCH4
RP11-284F21.11	IQGAP3
RP11-284F21.11	TTC24
RP11-284F21.11	APOA1BP
RP11-284F21.11	GPATCH4
RP11-284F21.11	HAPLN2
RP11-284F21.11	BCAN
RP11-284F21.11	NES
RP11-284F21.11	CRABP2
RP11-284F21.9	IQGAP3
RP11-284F21.9	TTC24
RP11-284F21.9	APOA1BP
RP11-284F21.9	GPATCH4
RP11-284F21.9	HAPLN2
RP11-284F21.9	BCAN
RP11-284F21.9	NES
RP11-284F21.9	CRABP2
RP11-284F21.9	ISG20L2
RP11-284F21.9	RRNAD1
RP11-284F21.9	MRPL24
RP11-66D17.3	APOA1BP
RP11-66D17.3	GPATCH4
RP11-66D17.3	HAPLN2
RP11-66D17.3	BCAN
RP11-66D17.3	NES
RP11-66D17.3	CRABP2
RP11-66D17.3	ISG20L2
RP11-66D17.3	RRNAD1
RP11-66D17.3	MRPL24
RP11-66D17.3	HDGF
RP11-66D17.3	PRCC
RP11-71G12.1	ETV3L
RP11-71G12.1	ETV3
RP11-85G21.1	ETV3
RP11-404O13.1	KIRREL
RP11-404O13.1	CD1D
RP11-404O13.5	CD1D
RP11-404O13.5	CD1A
RP11-404O13.5	CD1C
MSTRG.2114.1	IFI16
MSTRG.2114.1	AIM2
MSTRG.2114.1	CADM3
RP11-180D21.3	OR10J1
RP11-180D21.3	OR10J5
RP11-48O20.4	CCDC19
RP11-48O20.4	AL590560.1
RP11-48O20.4	TAGLN2
RP11-48O20.4	IGSF9
RP11-48O20.4	SLAMF9
RP11-48O20.4	PIGM
RP11-48O20.4	KCNJ10
RP11-312J18.6	CD244
RP11-312J18.6	ITLN1
RP11-312J18.6	ITLN2
RP11-312J18.6	F11R
RP11-122G18.5	PCP4L1
RP11-122G18.5	MPZ
RP11-122G18.5	SDHC
RP11-122G18.5	C1orf192
RP11-122G18.8	PCP4L1
RP11-122G18.8	MPZ
RP11-122G18.8	SDHC
RP11-122G18.8	C1orf192
MSTRG.2174.1	SDHC
MSTRG.2174.1	C1orf192
MSTRG.2174.1	FCGR2A
MSTRG.2174.1	HSPA6
MSTRG.2174.1	FCGR3A
MSTRG.2191.1	FCGR2A
MSTRG.2191.1	HSPA6
MSTRG.2191.1	FCGR3A
MSTRG.2191.1	FCGR2B
RP11-227F8.2	ATF6
RP11-227F8.2	OLFML2B
RP11-227F8.2	NOS1AP
RP11-77M5.1	RGS5
RP11-77M5.1	NUF2
RP11-306I1.2	LRRC52
RP11-306I1.2	MGST3
RP11-306I1.2	ALDH9A1
RP11-466F5.10	MGST3
RP11-466F5.10	ALDH9A1
RP11-466F5.10	TMCO1
RP4-782G3.1	POGK
RP4-782G3.1	TADA1
RP4-782G3.1	ILDR2
RP4-782G3.1	MAEL
RP11-104L21.3	POU2F1
RP11-104L21.3	CD247
RP11-104L21.3	CREG1
RP5-968D22.3	XCL2
RP1-10C16.1	DPT
LINC00626	DPT
RP1-206D15.3	NME7
RP1-206D15.3	BLZF1
RP1-206D15.3	CCDC181
RP1-206D15.3	SLC19A2
RP1-206D15.3	F5
RP1-117P20.3	C1orf112
RP1-117P20.3	SELL
RP1-117P20.3	SELE
RP1-117P20.3	METTL18
RP1-117P20.3	SCYL3
RP11-297H3.3	METTL11B
RP11-545I10.2	GORAB
RP11-545I10.2	PRRX1
RP1-79C4.1	GORAB
RP1-79C4.1	PRRX1
MSTRG.2304.5	PRRX1
RP1-79C4.4	PRRX1
RP3-395P12.2	TNFSF4
RP11-160H22.3	RC3H1
RP11-160H22.5	RABGAP1L
RP5-1114G22.2	TNN
RP5-1114G22.2	KIAA0040
RP11-222A5.1	RFWD2
RP11-318C24.2	RFWD2
RP1-35C21.1	BRINP2
RASAL2-AS1	RASAL2
RP5-1098D14.1	RALGPS2
RP11-12M5.1	TDRD5
RP11-12M5.1	FAM163A
RP11-12M5.4	FAM163A
RP11-12M5.4	TOR1AIP2
RP11-12M5.4	IFRG15
RP11-12M5.4	TOR1AIP1
RP11-533E19.7	FAM163A
RP11-533E19.7	TOR1AIP2
RP11-533E19.7	IFRG15
RP11-533E19.7	TOR1AIP1
RP11-533E19.7	CEP350
RP11-533E19.2	TOR1AIP2
RP11-533E19.2	IFRG15
RP11-533E19.2	TOR1AIP1
RP11-533E19.2	CEP350
RP11-533E19.5	TOR1AIP2
RP11-533E19.5	IFRG15
RP11-533E19.5	TOR1AIP1
RP11-533E19.5	CEP350
RP11-502H18.2	CEP350
RP11-502H18.2	QSOX1
RP11-522D2.1	ACBD6
RP11-522D2.1	XPR1
RP11-46A10.2	XPR1
RP11-46A10.2	KIAA1614
RP11-46A10.2	AL162431.1
RP11-46A10.2	STX6
RP11-309G3.3	STX6
RP11-309G3.3	MR1
RP11-309G3.3	IER5
RP11-540K16.1	IER5
RP11-33M22.2	CACNA1E
RP11-538D16.2	ZNF648
RP11-538D16.3	ZNF648
GS1-122H1.1	ZNF648
LINC00272	TEDDM1
LINC00272	RGSL1
RP11-317P15.4	RGSL1
RP11-317P15.4	RNASEL
RP11-317P15.4	RGS16
RP11-317P15.4	RGS8
RP11-317P15.5	RGSL1
RP11-317P15.5	RNASEL
RP11-317P15.5	RGS16
RP11-317P15.5	RGS8
RP11-317P15.3	RGS8
RP11-317P15.3	NPL
RP1-127C7.6	SMG7
RP1-127C7.6	NCF2
RP1-127C7.6	ARPC5
RP1-127C7.6	RGL1
RP1-127C7.6	APOBEC4
RP11-382D12.1	C1orf21
RP11-382D12.2	C1orf21
GS1-120K12.4	FAM129A
GS1-120K12.4	RNF2
GS1-279B7.2	SWT1
GS1-279B7.2	IVNS1ABP
GS1-279B7.1	SWT1
GS1-279B7.1	IVNS1ABP
GS1-204I12.4	HMCN1
GS1-304P7.3	PDC
RP5-973M2.2	PTGS2
RP11-547I7.2	BRINP3
RP11-161I10.1	BRINP3
RP5-1011O1.3	RGS1
LINC01032	UCHL5
RP11-553K8.2	ATP6V1G3
RP11-553K8.2	PTPRC
RP11-532L16.3	ZNF281
LINC00862	ZNF281
RP11-469A15.2	ZNF281
RP11-469A15.2	KIF14
RP11-92G12.3	KIF14
RP11-92G12.3	DDX59
RP11-92G12.3	CAMSAP2
MSTRG.2603.1	CAMSAP2
MSTRG.2603.1	GPR25
MSTRG.2603.1	C1orf106
RP11-168O16.1	KIF21B
RP11-168O16.1	CACNA1S
RP11-168O16.1	ASCL5
MSTRG.2607.1	PKP1
MSTRG.2607.1	TNNT2
MSTRG.2607.1	LAD1
RP11-134G8.8	TNNT2
RP11-134G8.8	LAD1
RP11-134G8.8	TNNI1
RP11-134G8.8	PHLDA3
RP11-134G8.8	CSRP1
RPS10P7	PHLDA3
RPS10P7	CSRP1
MSTRG.2637.1	PPP1R12B
RP11-569A11.2	PPP1R12B
RP11-569A11.2	SYT2
RP11-569A11.2	KDM5B
RP11-480I12.7	KDM5B
RP11-480I12.7	RP11-480I12.4
RP11-480I12.7	RABIF
RP11-480I12.7	KLHL12
RP11-480I12.7	ADIPOR1
RP11-480I12.7	CYB5R1
MSTRG.2660.1	CHIT1
MSTRG.2660.1	BTG2
MSTRG.2660.1	FMOD
RP11-134P9.3	CHIT1
RP11-134P9.3	BTG2
RP11-134P9.3	FMOD
RP11-134P9.1	CHIT1
RP11-134P9.1	BTG2
RP11-134P9.1	FMOD
LINC00303	SOX13
LINC00303	ETNK2
RP11-430C7.5	MDM4
RP11-430C7.5	LRRN2
RP11-23I7.1	MDM4
RP11-23I7.1	LRRN2
RP11-576D8.4	LEMD1
RP11-576D8.4	CDK18
RP11-38J22.1	FAM72A
RP11-38J22.1	AVPR1B
RP11-38J22.1	C1orf186
RP11-38J22.6	AVPR1B
RP11-38J22.6	C1orf186
RP11-38J22.6	CTSE
MSTRG.2722.1	IL19
MSTRG.2722.1	IL20
MSTRG.2722.1	IL24
MSTRG.2722.1	FAIM3
MSTRG.2722.1	PIGR
MSTRG.2722.1	FCAMR
RP11-164O23.7	C4BPB
RP11-164O23.7	C4BPA
RP11-6J21.2	CD55
RP11-328D5.1	CD46
RP11-328D5.1	CD34
RP1-272L16.1	CAMK1G
RP1-272L16.1	LAMB3
RP11-543B16.3	KCNH1
RP11-543B16.3	RCOR3
RP11-318L16.6	TRAF5
RP11-318L16.6	RD3
RP11-359E8.3	RD3
RP11-359E8.3	SLC30A1
RP11-354K1.2	SLC30A1
RP11-354K1.2	NEK2
RP11-354K1.1	SLC30A1
RP11-354K1.1	NEK2
RP11-122M14.3	NEK2
RP11-122M14.3	LPGAT1
RP11-15I11.2	DTL
RP11-15I11.3	PPP2R5A
RP11-61J19.2	TMEM206
RP11-61J19.2	NENF
RP11-61J19.2	ATF3
RP11-61J19.3	ATF3
RP11-61J19.3	FAM71A
RP11-61J19.4	ATF3
RP11-61J19.4	FAM71A
RP11-338C15.3	ATF3
RP11-338C15.3	FAM71A
RP11-338C15.3	BATF3
RP11-338C15.3	NSL1
FLVCR1-AS1	NSL1
FLVCR1-AS1	TATDN3
FLVCR1-AS1	C1orf227
FLVCR1-AS1	FLVCR1
FLVCR1-AS1	VASH2
LINC00210	SPATA17
MSTRG.2807.1	C1orf143
MSTRG.2807.2	C1orf143
RP11-135J2.3	LYPLAL1
RP11-302I18.3	RAB3GAP2
RP11-302I18.3	AC096644.1
RP11-410C4.5	AC096644.1
RP11-410C4.4	AC096644.1
RP11-410C4.4	MARK1
RNU6ATAC35P	2018-03-02
RNU6ATAC35P	2018-03-01
RNU6ATAC35P	HLX
RP11-295M18.6	2018-03-02
RP11-295M18.6	2018-03-01
RP11-295M18.6	HLX
RP11-295M18.2	2018-03-02
RP11-295M18.2	2018-03-01
RP11-295M18.2	HLX
RP11-191N8.2	DUSP10
RP11-358H9.1	HHIPL2
RP11-452F19.3	FAM177B
RP11-452F19.3	DISP1
RP11-239E10.2	TLR5
RP11-239E10.2	SUSD4
RP11-239E10.3	TLR5
RP11-239E10.3	SUSD4
RP11-504P24.8	AC138393.1
RP11-504P24.4	AC138393.1
RP11-504P24.6	AC138393.1
RP11-396C23.2	SDE2
RP11-396C23.2	H3F3A
RP11-396C23.2	ACBD3
RP11-275O4.3	ZNF678
RP11-245P10.6	OBSCN
RP11-245P10.6	TRIM11
RP11-245P10.6	TRIM17
RP11-245P10.6	HIST3H3
RP11-245P10.6	HIST3H2A
RP11-245P10.6	HIST3H2BB
RP5-1061H20.4	TMEM78
RP5-1061H20.4	RAB4A
RP5-1061H20.4	SPHAR
RP5-1061H20.4	CCSAP
RP5-1068B5.3	CCSAP
RP5-1068B5.3	ACTA1
RP5-1068B5.3	NUP133
RP5-1068B5.3	ABCB10
RP11-552D4.1	GALNT2
RP11-543E8.1	COG2
RP5-858B6.1	CAPN9
RP5-858B6.1	C1orf198
RP5-858B6.1	TTC13
RP11-66A2.1	MAP10
RP11-66A2.2	MAP10
MSTRG.2972.1	KCNK1
RP5-855F14.1	TARBP1
RP5-855F14.1	IRF2BP2
RP5-855F14.2	TARBP1
RP5-855F14.2	IRF2BP2
LINC00184	IRF2BP2
RP4-781K5.9	IRF2BP2
RP4-781K5.4	IRF2BP2
RP4-781K5.5	IRF2BP2
RP4-781K5.6	IRF2BP2
RP4-597N16.4	TOMM20
RP4-597N16.4	RBM34
RP4-597N16.4	ARID4B
RP5-940F7.2	LYST
RP5-940F7.2	NID1
RP4-580N22.2	LYST
RP4-580N22.2	NID1
RP11-35L17.3	CHRM3
RP11-35L17.3	FMN2
RP11-467I20.2	FMN2
RP11-467I20.2	AL646016.1
RP11-467I20.2	GREM2
RP11-80B9.4	RGS7
RP11-527D7.1	RGS7
RP11-527D7.1	FH
RP11-261C10.2	CEP170
RP11-261C10.3	CEP170
RP11-278H7.4	AL590483.1
RP11-278H7.3	AL590483.1
RP11-11N7.4	COX20
RP11-11N7.4	HNRNPU
MSTRG.3106.1	SMYD3
RP11-690C23.2	SMYD3
RP11-690C23.2	TFB2M
RP11-690C23.2	CNST
RP11-439E19.9	CNST
RP11-439E19.9	SCCPDH
RP11-439E19.7	CNST
RP11-439E19.7	SCCPDH
RP11-488L18.10	ZNF669
RP11-488L18.10	C1orf229
RP11-488L18.10	ZNF124
RP11-488L18.8	ZNF124
RP11-488L18.8	ZNF496
XX-CR54.1	OR2T11
XX-CR54.1	OR2T35
XX-CR54.1	OR2T27
XX-CR54.1	OR14I1
XX-CR54.1	LYPD8
XX-CR54.3	OR2T11
XX-CR54.3	OR2T35
XX-CR54.3	OR2T27
XX-CR54.3	OR14I1
XX-CR54.3	LYPD8
RP11-809C18.4	DIP2C
RP11-809C18.4	PRR26
RP11-164C1.2	DIP2C
RP11-164C1.2	PRR26
RP11-164C1.2	LARP4B
LINC00200	WDR37
LINC00200	ADARB2
RP11-118K6.2	PFKP
RP11-118K6.3	PFKP
RP11-118K6.3	PITRM1
RP11-298E9.5	PFKP
RP11-298E9.5	PITRM1
RP11-298E9.6	PITRM1
RP11-195B3.1	PITRM1
RP11-464C19.2	KLF6
MSTRG.3147.1	AKR1E2
RP11-445P17.3	AKR1CL1
RP11-445P17.3	AKR1C4
RP11-445P17.8	AKR1CL1
RP11-445P17.8	AKR1C4
RP11-445P17.8	UCN3
RP13-463N16.6	CALML5
RP13-463N16.6	CALML3
RP13-463N16.6	ASB13
RP13-463N16.6	FAM208B
RP11-336A10.5	CALML3
RP11-336A10.5	ASB13
RP11-336A10.5	FAM208B
RP11-336A10.4	CALML3
RP11-336A10.4	ASB13
RP11-336A10.4	FAM208B
RP11-318E3.9	FAM208B
RP11-318E3.9	GDI2
RP11-318E3.9	ANKRD16
RP11-318E3.9	FBXO18
RP11-563J2.2	DKFZP667F0711
RP11-563J2.2	PFKFB3
PRKCQ-AS1	PRKCQ
RP11-554I8.1	PRKCQ
RP11-393K12.2	SFMBT2
RP5-1031D4.2	SFMBT2
GATA3-AS1	TAF3
GATA3-AS1	GATA3
RP11-379F12.4	TAF3
RP11-379F12.4	GATA3
RP11-379F12.3	TAF3
RP11-379F12.3	GATA3
RP1-251M9.2	CELF2
RP11-138I18.2	USP6NL
RP11-138I18.2	ECHDC3
RP11-398C13.6	CDNF
RP11-398C13.6	HSPA14
RP11-398C13.6	SUV39H2
RP11-398C13.6	DCLRE1C
RP11-398C13.6	MEIG1
RP11-406H21.2	CUBN
RP11-406H21.2	TRDMT1
RP11-406H21.2	VIM
ARL5B-AS1	NSUN6
ARL5B-AS1	RP11-139J15.7
ARL5B-AS1	ARL5B
RP11-139J15.5	NSUN6
RP11-139J15.5	RP11-139J15.7
RP11-139J15.5	ARL5B
MSTRG.3282.1	C10orf112
MSTRG.3282.1	PLXDC2
RP11-108B14.5	EBLN1
RP11-108B14.5	COMMD3
RP11-108B14.5	COMMD3-BMI1
RP11-573G6.6	EBLN1
RP11-573G6.6	COMMD3
RP11-573G6.6	COMMD3-BMI1
RP11-573G6.6	BMI1
RP11-573G6.6	SPAG6
RP11-573G6.9	COMMD3
RP11-573G6.9	COMMD3-BMI1
RP11-573G6.9	BMI1
RP11-573G6.9	SPAG6
RP11-573G6.8	COMMD3
RP11-573G6.8	COMMD3-BMI1
RP11-573G6.8	BMI1
RP11-573G6.8	SPAG6
RP11-573G6.10	COMMD3
RP11-573G6.10	COMMD3-BMI1
RP11-573G6.10	BMI1
RP11-573G6.10	SPAG6
MSTRG.3313.1	MSRB2
MSTRG.3313.1	PTF1A
MSTRG.3313.1	C10orf115
RP11-165A20.3	PRTFDC1
RP11-165A20.3	ENKUR
RP11-165A20.3	THNSL1
RP11-80K21.3	GPR158
RP11-128B16.3	APBB1IP
LINC00264	APBB1IP
LINC00202-2	APBB1IP
LINC00202-2	PDSS1
RP13-16H11.7	APBB1IP
RP13-16H11.7	PDSS1
RP13-16H11.2	PDSS1
RP13-16H11.2	ABI1
LINC00202-1	ABI1
LINC00202-1	ANKRD26
LINC00614	ABI1
LINC00614	ANKRD26
RP11-85G18.6	YME1L1
RP11-85G18.6	MASTL
RP11-85G18.6	ACBD5
RP11-748L13.6	PTCHD3
RP11-218D6.4	ARMC4
RP11-218D6.4	MPP7
RP11-351M16.3	WAC
MSTRG.3349.1	WAC
RP11-478H13.1	BAMBI
LINC00837	C10orf126
RP11-478H13.3	C10orf126
RP11-253D19.1	MAP3K8
RP11-253D19.1	LYZL2
RP11-253D19.2	LYZL2
RP11-14C22.3	LYZL2
RP11-14C22.6	LYZL2
RP11-14C22.6	ZNF438
RP11-472N13.2	ZEB1
RP11-479G22.8	C10orf68
RP11-479G22.8	ITGB1
RP11-462L8.1	ITGB1
RP11-342D11.3	NRP1
RP11-90B22.1	NRP1
MSTRG.3453.2	PARD3
MSTRG.3450.2	PARD3
MSTRG.3454.1	PARD3
RP11-324I22.2	CREM
RP11-324I22.2	CCNY
RP11-20F24.2	ANKRD30A
LINC00993	ANKRD30A
RP11-258F22.1	ZNF248
RP11-258F22.2	ZNF248
RP11-393J16.4	ZNF25
RP11-393J16.4	ZNF33A
RP11-508N22.12	ZNF33A
RP11-508N22.12	ZNF37A
RP11-508N22.13	ZNF33A
RP11-508N22.13	ZNF37A
RP11-508N22.9	ZNF37A
RP11-291L22.4	LINC00999
AL022344.4	ZNF33B
AL022344.5	ZNF33B
AL022344.5	BMS1
AL022344.7	BMS1
RP11-124O11.1	BMS1
RP11-124O11.2	RET
RP11-351D16.3	RET
RP11-351D16.3	CSGALNACT2
RP11-351D16.3	RASGEF1A
RP11-168L22.2	RASGEF1A
RP11-168L22.2	FXYD4
RP11-168L22.2	HNRNPF
RP11-517P14.2	FXYD4
RP11-517P14.2	HNRNPF
RP11-517P14.2	ZNF487
RP11-402L1.4	ZNF239
RP11-402L1.4	ZNF485
RP11-402L1.4	ZNF32
RP11-402L1.11	ZNF239
RP11-402L1.11	ZNF485
RP11-402L1.11	ZNF32
RP11-20J15.2	CXCL12
RP11-285G1.9	TMEM72
RP11-285G1.9	RASSF4
RP11-285G1.9	C10orf10
RP11-285G1.9	C10orf25
RP11-285G1.9	ZNF22
MSTRG.3521.2	ALOX5
MSTRG.3521.2	2018-03-08
RP11-38L15.8	SYT15
RP11-38L15.8	GPRIN2
RP11-38L15.2	SYT15
RP11-38L15.2	GPRIN2
LINC00842	NPY4R
MSTRG.3531.19	NPY4R
MSTRG.3531.19	ANXA8L1
MSTRG.3531.19	FAM25B
MSTRG.3531.19	AGAP10
RP11-144G6.10	AGAP10
RP11-292F22.5	ANTXRL
RP11-292F22.7	ANTXRL
RP11-292F22.7	ANXA8L2
RP11-292F22.7	AL603965.1
MSTRG.3540.10	ANTXRL
MSTRG.3540.10	ANXA8L2
MSTRG.3540.10	AL603965.1
MSTRG.3540.12	ANTXRL
MSTRG.3540.12	ANXA8L2
MSTRG.3540.12	AL603965.1
RP11-463P17.1	AGAP9
RP11-463P17.1	FAM25G
RP11-463P17.1	ANXA8
RP11-463P17.1	AL591684.1
RP11-463P17.1	ZNF488
RP11-463P17.1	RBP3
RP11-463P17.1	GDF2
MSTRG.3538.2	FAM25C
RP11-534L6.2	ARHGAP22
RP11-534L6.2	WDFY4
FAM25D	PARG
FAM25D	FAM21D
FAM25D	AGAP8
RP11-592B15.9	FAM21D
RP11-592B15.9	AGAP8
LINC00843	AGAP6
LINC00843	FAM21A
RP11-96B5.4	A1CF
RP11-96B5.4	PRKG1
RP11-598C10.2	PCDH15
RP11-598C10.1	PCDH15
RP11-598C10.1	MTRNR2L5
RP11-179B15.5	IPMK
RP11-179B15.5	CISD1
RP11-179B15.5	UBE2D1
RP11-179B15.5	TFAM
RP11-179B15.6	IPMK
RP11-179B15.6	CISD1
RP11-179B15.6	UBE2D1
RP11-179B15.6	TFAM
RP11-135D11.2	SLC16A9
LINC00948	SLC16A9
LINC00948	CCDC6
RP11-131N11.4	ANK3
RP11-131N11.4	CDK1
LINC00845	RHOBTB1
RP11-491H19.1	C10orf107
MSTRG.3683.1	ARID5B
RP11-120C12.3	RTKN2
RP11-120C12.3	ZNF365
RP11-57G10.8	DNAJC12
RP11-57G10.8	SIRT1
RP11-57G10.8	HERC4
RP11-153K11.3	MYPN
RP11-153K11.3	ATOH7
RP11-153K11.3	PBLD
RP11-153K11.3	HNRNPH3
MSTRG.3758.1	CCAR1
MSTRG.3758.1	STOX1
RP11-262I2.2	COL13A1
RP11-262I2.2	H2AFY2
RP11-432J9.3	SGPL1
RP11-432J9.3	PCBD1
RP11-432J9.6	SGPL1
RP11-432J9.6	PCBD1
RP11-472G21.2	CDH23
RP11-472G21.2	PSAP
RP11-472G21.2	CHST3
RP11-150D20.5	CHST3
RP11-150D20.5	SPOCK2
RP11-150D20.5	ASCC1
RP11-344N10.5	P4HA1
RP11-344N10.5	NUDT13
RP11-344N10.5	ECD
RP11-344N10.5	FAM149B1
RP11-344N10.5	DNAJC9
RP11-464F9.22	USP54
RP11-464F9.22	MYOZ1
RP11-464F9.22	SYNPO2L
RP11-464F9.22	AGAP5
RP11-574K11.29	USP54
RP11-574K11.29	MYOZ1
RP11-574K11.29	SYNPO2L
RP11-574K11.29	AGAP5
RP11-574K11.29	SEC24C
RP11-574K11.29	AC022400.2
RP11-574K11.29	FUT11
RP11-574K11.29	CHCHD1
RP11-574K11.29	ZSWIM8
RP11-574K11.29	RP11-574K11.31
RP11-574K11.29	NDST2
RP11-178G16.4	VCL
RP11-178G16.4	AP3M1
RP11-178G16.4	ADK
RP11-178G16.5	VCL
RP11-178G16.5	AP3M1
RP11-178G16.5	ADK
RP11-222G7.2	KAT6B
RP11-399K21.13	ZNF503
RP11-399K21.14	ZNF503
MSTRG.3933.1	POLR3A
MSTRG.3933.1	RPS24
RP11-481G8.2	ZMIZ1
MSTRG.3938.1	ZCCHC24
MSTRG.3938.1	AL133481.1
MSTRG.3938.1	EIF5AL1
MSTRG.3938.1	SFTPA2
RP11-342M3.1	ZCCHC24
RP11-342M3.1	AL133481.1
RP11-342M3.1	EIF5AL1
RP11-342M3.1	SFTPA2
RP11-589B3.6	SFTPA2
RP11-589B3.6	SFTPA1
RP11-589B3.6	NUTM2B
RP11-506M13.3	SFTPA1
RP11-506M13.3	NUTM2B
RP11-773D16.1	NUTM2E
RP11-182L21.6	NUTM2E
RP11-479O17.10	SFTPD
LINC00857	PLAC9
LINC00857	ANXA11
LINC00857	AL359195.1
LINC00857	MAT1A
RP11-36D19.8	AL359195.1
RP11-36D19.8	MAT1A
RP11-36D19.8	DYDC1
RP11-36D19.8	DYDC2
RP11-36D19.8	FAM213A
RP11-137H2.6	DYDC1
RP11-137H2.6	DYDC2
RP11-137H2.6	FAM213A
RP11-137H2.6	TSPAN14
RP11-514F8.2	SH2D4B
MSTRG.3981.1	GHITM
MSTRG.3981.1	C10orf99
MSTRG.3981.1	CDHR1
MSTRG.3981.1	LRIT2
MSTRG.3981.1	LRIT1
MSTRG.3981.1	RGR
LINC00858	CDHR1
LINC00858	LRIT2
LINC00858	LRIT1
LINC00858	RGR
LINC00858	CCSER2
MSTRG.4019.1	FAM35A
MSTRG.4019.1	NUTM2A
LINC00863	NUTM2D
LINC00864	NUTM2D
RP11-57C13.4	MINPP1
RP11-57C13.4	PAPSS2
RP11-57C13.6	PAPSS2
MSTRG.4039.1	ATAD1
MSTRG.4039.1	KLLN
MSTRG.4039.1	PTEN
MSTRG.4051.2	LIPM
MSTRG.4051.2	ANKRD22
MSTRG.4051.2	STAMBPL1
RP11-80H5.6	SLC16A12
RP11-80H5.6	PANK1
RP11-80H5.6	KIF20B
RP11-80H5.9	PANK1
RP11-80H5.9	KIF20B
RP11-80H5.7	PANK1
RP11-80H5.7	KIF20B
LINC00865	KIF20B
RP11-236B18.2	RPP30
RP11-236B18.2	ANKRD1
RP11-236B18.5	RPP30
RP11-236B18.5	ANKRD1
RP11-310E22.5	CYP2C8
RP11-310E22.5	C10orf129
RP11-310E22.5	PDLIM1
MSTRG.4153.1	LCOR
LINC00866	ZFYVE27
LINC00866	SFRP5
LINC00866	CRTAC1
LINC00866	GOLGA7B
RP11-441O15.3	CNNM1
RP11-441O15.3	GOT1
RP11-129J12.1	GOT1
RP11-129J12.1	NKX2-3
RP11-129J12.1	SLC25A28
RP11-285F16.1	PKD2L1
RP11-285F16.1	SCD
RP11-285F16.1	WNT8B
RP11-285F16.1	SEC31B
RP11-285F16.1	NDUFB8
RP11-108L7.14	FAM178A
RP11-108L7.14	MRPL43
RP11-108L7.14	SEMA4G
RP11-108L7.14	C10orf2
RP11-108L7.14	LZTS2
RP11-108L7.14	PDZD7
RP11-108L7.14	SFXN3
RP11-108L7.14	KAZALD1
RP11-108L7.15	FAM178A
RP11-108L7.15	MRPL43
RP11-108L7.15	SEMA4G
RP11-108L7.15	C10orf2
RP11-108L7.15	LZTS2
RP11-108L7.15	PDZD7
RP11-108L7.15	SFXN3
RP11-108L7.15	KAZALD1
RP11-108L7.15	TLX1NB
RP11-108L7.15	HUG1
RP11-108L7.15	TLX1
RP11-324L3.1	TLX1NB
RP11-324L3.1	HUG1
RP11-324L3.1	TLX1
RP11-324L3.1	LBX1
RP11-107I14.4	LBX1
RP11-107I14.2	LBX1
RP11-107I14.2	BTRC
RP11-107I14.5	LBX1
RP11-107I14.5	BTRC
RP11-190J1.3	DPCD
RP11-190J1.3	FBXW4
RP11-190J1.3	FGF8
RP11-190J1.3	NPM3
RP11-190J1.3	MGEA5
RP11-47A8.5	SUFU
RP11-47A8.5	TRIM8
RP11-47A8.5	ARL3
RP11-47A8.5	SFXN2
RP11-724N1.1	WBP1L
RP11-724N1.1	CYP17A1
RP11-724N1.1	C10orf32
RP11-724N1.1	C10orf32-ASMT
RP11-724N1.1	AS3MT
RP11-724N1.1	CNNM2
RP11-127L20.3	WDR96
RP11-127L20.3	GSTO1
RP11-127L20.3	GSTO2
RP11-127L20.3	ITPRIP
RP11-127L20.3	CCDC147
RP11-127O4.3	CCDC147
RP11-127O4.2	SORCS3
RP11-525A16.4	DUSP5
RP11-313D6.3	RBM20
RP11-313D6.3	PDCD4
RP11-313D6.3	BBIP1
RP11-313D6.3	SHOC2
MSTRG.4356.1	TDRD1
MSTRG.4356.1	VWA2
MSTRG.4356.1	AFAP1L2
RP11-106M7.1	ABLIM1
RP11-106M7.1	FAM160B1
RP11-383C6.2	FAM160B1
RP11-383C6.2	TRUB1
RP11-383C6.2	ATRNL1
RP11-501J20.2	KIAA1598
RP11-501J20.2	VAX1
RP11-501J20.2	KCNK18
RP11-501J20.2	SLC18A2
CTA-109P11.1	EMX2
LINC00867	FAM204A
MSTRG.4386.1	PRLHR
MSTRG.4397.1	RGS10
MSTRG.4397.1	TIAL1
MSTRG.4397.1	BAG3
RP11-95I16.2	WDR11
RP11-62L18.3	FGFR2
RP11-282I1.2	GPR26
RP13-238F13.5	OAT
RP13-238F13.5	NKX1-2
RP13-238F13.5	LHPP
RP11-383C5.3	TEX36
RP11-383C5.3	C10orf137
RP11-383C5.3	MMP21
RP11-383C5.4	TEX36
RP11-383C5.4	C10orf137
RP11-383C5.4	MMP21
RP11-383C5.4	UROS
LINC00601	ADAM12
LINC00601	C10orf90
RP11-4C20.3	CLRN3
RP11-4C20.3	PTPRE
RP11-109A6.3	MGMT
RP11-109A6.3	EBF3
LINC00959	GLRX3
RP11-432J24.2	STK32C
RP11-432J24.2	LRRC27
RP11-432J24.2	PWWP2B
RP11-432J24.2	C10orf91
RP11-432J24.5	C10orf91
RP11-432J24.5	INPP5A
RP11-432J24.5	PWWP2B
RP11-288G11.3	INPP5A
RP11-288G11.3	NKX6-2
RP11-288G11.3	TTC40
RP13-137A17.4	TTC40
RP13-137A17.5	TTC40
RP13-137A17.6	TTC40
RP11-122K13.14	KNDC1
RP11-122K13.14	UTF1
RP11-122K13.14	VENTX
RP11-122K13.14	ADAM8
RP11-122K13.14	TUBGCP2
RP11-122K13.14	ZNF511
RP11-122K13.14	CALY
RP11-122K13.14	PRAP1
RP11-122K13.14	FUOM
RP11-122K13.14	ECHS1
RP11-122K13.14	PAOX
RP11-122K13.14	AL360181.1
RP11-122K13.14	RP11-108K14.8
RP11-122K13.14	MTG1
RP11-122K13.14	SPRN
RP11-304M2.6	BET1L
RP11-304M2.6	SCGB1C1
RP11-304M2.6	ODF3
RP11-304M2.6	RIC8A
RP11-304M2.6	SIRT3
LINC01001	BET1L
LINC01001	SCGB1C1
LINC01001	ODF3
LINC01001	RIC8A
LINC01001	SIRT3
RP11-326C3.14	SIRT3
RP11-326C3.14	PSMD13
RP11-326C3.14	NLRP6
RP11-326C3.14	ATHL1
RP11-326C3.14	IFITM5
RP11-326C3.14	IFITM2
RP11-326C3.14	IFITM1
RP11-326C3.14	IFITM3
RP11-326C3.14	B4GALNT4
RP11-326C3.14	PKP3
RP11-326C3.14	SIGIRR
RP11-326C3.14	ANO9
RP11-326C3.13	SIRT3
RP11-326C3.13	PSMD13
RP11-326C3.13	NLRP6
RP11-326C3.13	ATHL1
RP11-326C3.13	IFITM5
RP11-326C3.13	IFITM2
RP11-326C3.13	IFITM1
RP11-326C3.13	IFITM3
RP11-326C3.13	B4GALNT4
RP11-326C3.13	PKP3
RP11-326C3.13	SIGIRR
RP11-326C3.13	ANO9
RP11-326C3.12	SIRT3
RP11-326C3.12	PSMD13
RP11-326C3.12	NLRP6
RP11-326C3.12	ATHL1
RP11-326C3.12	IFITM5
RP11-326C3.12	IFITM2
RP11-326C3.12	IFITM1
RP11-326C3.12	IFITM3
RP11-326C3.12	B4GALNT4
RP11-326C3.12	PKP3
RP11-326C3.12	SIGIRR
RP11-326C3.12	ANO9
RP11-326C3.15	SIRT3
RP11-326C3.15	PSMD13
RP11-326C3.15	NLRP6
RP11-326C3.15	ATHL1
RP11-326C3.15	IFITM5
RP11-326C3.15	IFITM2
RP11-326C3.15	IFITM1
RP11-326C3.15	IFITM3
RP11-326C3.15	B4GALNT4
RP11-326C3.15	PKP3
RP11-326C3.15	SIGIRR
RP11-326C3.15	ANO9
MIR210HG	PTDSS2
MIR210HG	RNH1
MIR210HG	HRAS
MIR210HG	LRRC56
MIR210HG	C11orf35
MIR210HG	RASSF7
MIR210HG	PHRF1
MIR210HG	IRF7
MIR210HG	CDHR5
MIR210HG	SCT
MIR210HG	DRD4
MIR210HG	DEAF1
RP13-870H17.3	AP2A2
RP13-870H17.3	MUC6
RP13-870H17.3	MUC2
MSTRG.4531.2	MUC5AC
MSTRG.4531.2	MUC5B
MSTRG.4531.2	TOLLIP
MSTRG.4531.2	AC136297.1
MSTRG.4532.1	MUC5AC
MSTRG.4532.1	MUC5B
MSTRG.4532.1	TOLLIP
MSTRG.4532.1	AC136297.1
AP006285.7	DUSP8
AP006285.7	KRTAP5-1
AP006285.7	KRTAP5-2
AP006285.7	KRTAP5-3
AP006285.7	KRTAP5-4
AP006285.7	KRTAP5-5
AP006285.7	KRTAP5-6
AP006285.7	IFITM10
AP006285.7	RP11-295K3.1
AP006285.7	CTSD
AP006285.6	KRTAP5-2
AP006285.6	KRTAP5-3
AP006285.6	KRTAP5-4
AP006285.6	KRTAP5-5
AP006285.6	KRTAP5-6
AP006285.6	IFITM10
AP006285.6	RP11-295K3.1
AP006285.6	CTSD
[truncated: 12,777 more rows]

## Sheet: Table S6-trans-acting.pairs
#lincRNA	mRNA	correlation
AC019118.2	NXPE2	0.971174
AC019118.2	PABPC1L2B	0.972293
AC019118.2	ERBB4	0.954146
AC019118.2	PDE4D	0.958082
AC019118.2	LPPR1	0.969704
AC019118.2	VSIG2	0.964262
AC019118.2	GOLM1	0.961416
AC019118.2	DNAJC22	0.977539
AC019118.2	GALNT4	0.962758
AC019118.2	FOXA1	0.951297
AC019118.2	C1QTNF8	0.960322
AC019118.2	B3GALT5	0.976327
AC019118.2	WIF1	0.964695
AC019118.2	CDR1	0.965703
AC019118.2	ITLN1	0.960573
AC019118.2	LRRC31	0.972051
AC019118.2	PBOV1	0.967592
AC019118.2	PTF1A	0.9626
AC019118.2	ALDH1A1	0.954549
AC019118.2	CREB3L4	0.963219
AC019118.2	MDGA2	0.974385
AC019118.2	SMIM22	0.951226
AC019118.2	POC1B-GALNT4	0.962759
AC019118.2	SCGB2A1	0.964878
AC019118.2	CLDN10	0.970748
AC019118.2	NKX3-1	0.969826
AC019118.2	B3GNT6	0.969394
AC019118.2	LDLRAD1	0.972572
AC019118.2	UGT2B28	0.95685
AC019118.2	CCDC110	0.95199
AC019118.2	PRR15L	0.980341
AC019118.2	TFF3	0.97015
AC019118.2	PAX1	0.958616
AC019118.2	GP2	0.972871
AC019118.2	TMEM178A	0.97399
AC019118.2	NKX2-6	0.962818
AC019118.2	ETV1	0.970065
AC019118.2	CAPN9	0.971417
AC019118.2	MS4A8	0.968449
AC019118.2	NXPE4	0.955089
AC019118.2	CHST9	0.956077
AC019118.2	BCAS1	0.978421
AC019118.2	PCP4	0.968713
AC019118.2	HEPACAM2	0.969105
AC019118.2	RNF183	0.965606
AC019118.2	AC138517.1	0.961879
AC019118.2	AGR2	0.97317
AC019118.2	REG4	0.973885
AC019118.2	CA10	0.974921
AC019118.2	CGREF1	0.969334
AC019118.2	GABRB1	0.964792
AC019118.2	MFSD6L	0.961942
AC019118.2	SPDEF	0.97352
AC019118.2	MFSD4	0.970642
AC019118.2	C9orf152	0.969248
AC019118.2	SYTL5	0.963176
AC019118.2	EFCAB4A	0.954744
AC019118.2	CLDN3	0.957619
AC019118.2	SLC44A4	0.973558
AC019118.2	C21orf88	0.973864
AC019118.2	SCGB3A1	0.962579
AC019118.2	ARMC3	0.971561
AC019118.2	CDH12	0.980545
AC019118.2	TFF1	0.970047
AC019118.2	MLPH	0.962554
AC019118.2	GRIA2	0.967061
AC019118.2	KIAA1324	0.955569
AC019118.2	MUC16	0.969859
AC019118.2	TFF2	0.967889
AC019118.2	FOXA3	0.970045
AC019118.2	TTC6	0.972347
AC019118.2	MUC5B	0.973194
AC019118.2	NUPR1L	0.95744
AC019118.2	GNMT	0.962715
AC019118.2	PDE8B	0.965924
AC019118.2	BPIFB2	0.971796
AC019118.2	CHRM1	0.950487
AC019118.2	SIM2	0.950824
AC019118.2	TAAR1	0.9626
AC019118.2	ST6GALNAC1	0.968787
AC019118.2	FAM177B	0.96902
AC019118.2	LRRIQ4	0.950593
AC019118.2	SSTR5	0.963844
AC019118.2	NWD1	0.973947
AC019118.2	GJB1	0.977713
AC019118.2	STAC2	0.955769
AC019118.2	KIAA1147	0.950874
AC019118.2	AQP5	0.957291
AC019118.2	PANX3	0.964334
AC019118.2	ENTPD8	0.977294
AC019118.2	TOX3	0.961721
AC019118.2	EPHA5	0.966385
AC019118.2	KIAA1244	0.97333
AC019118.2	PABPC1L2A	0.971144
AC019118.2	IGSF5	0.963768
AC019118.2	HMGCS2	0.973016
AC019118.2	CGNL1	0.954335
AC019118.2	TSPAN12	0.969061
AC019118.2	KRT7	0.964381
AC019118.2	ADAL	0.954209
AC019118.2	DACH2	0.96659
AC019118.2	TSPAN1	0.963292
AC019118.2	CXXC4	0.966162
AP000705.7	NXPH1	0.973484
AP000705.7	PSKH2	0.957974
AP000705.7	MTNR1A	0.980804
AP000705.7	RBBP8	0.979404
AP000705.7	AC008372.1	0.99321
AP000705.7	CT62	0.99112
AP000705.7	PSG4	0.967992
AP000705.7	SLC26A7	0.953555
AP000705.7	UCHL1	0.960763
RP11-142A23.1	SSH2	0.950683
RP11-16D22.2	CREB3L1	0.955184
RP11-16D22.2	NXPE2	0.996522
RP11-16D22.2	PABPC1L2B	0.998365
RP11-16D22.2	ERBB4	0.969887
RP11-16D22.2	PDE4D	0.97344
RP11-16D22.2	LPPR1	0.974109
RP11-16D22.2	VSIG2	0.993992
RP11-16D22.2	GOLM1	0.988252
RP11-16D22.2	DNAJC22	0.978518
RP11-16D22.2	SEMA3E	0.968779
RP11-16D22.2	GALNT4	0.988552
RP11-16D22.2	FOXA1	0.955916
RP11-16D22.2	C1QTNF8	0.991473
RP11-16D22.2	B3GALT5	0.997703
RP11-16D22.2	WIF1	0.990717
RP11-16D22.2	SMIM1	0.966759
RP11-16D22.2	CDR1	0.998438
RP11-16D22.2	ITLN1	0.985008
RP11-16D22.2	LRRC31	0.998004
RP11-16D22.2	PRH2	0.964094
RP11-16D22.2	PBOV1	0.981194
RP11-16D22.2	PTF1A	0.990212
RP11-16D22.2	GAL3ST2	0.965185
RP11-16D22.2	ALDH1A1	0.976533
RP11-16D22.2	CREB3L4	0.980121
RP11-16D22.2	MDGA2	0.997086
RP11-16D22.2	SMIM22	0.974572
RP11-16D22.2	POC1B-GALNT4	0.988552
RP11-16D22.2	SCGB2A1	0.991931
RP11-16D22.2	CLDN10	0.997975
RP11-16D22.2	NKX3-1	0.997339
RP11-16D22.2	B3GNT6	0.996078
RP11-16D22.2	LDLRAD1	0.993064
RP11-16D22.2	AL163636.6	0.953518
RP11-16D22.2	UGT2B28	0.972597
RP11-16D22.2	CCDC110	0.971979
RP11-16D22.2	BPIFA2	0.969933
RP11-16D22.2	PRR15L	0.991694
RP11-16D22.2	TFF3	0.996922
RP11-16D22.2	PAX1	0.972899
RP11-16D22.2	GP2	0.996647
RP11-16D22.2	TMEM178A	0.99769
RP11-16D22.2	NKX2-6	0.984819
RP11-16D22.2	ETV1	0.994465
RP11-16D22.2	AGR3	0.95915
RP11-16D22.2	VSTM2L	0.961184
RP11-16D22.2	CAPN9	0.994455
RP11-16D22.2	MS4A8	0.987687
RP11-16D22.2	NXPE4	0.984114
RP11-16D22.2	CHST9	0.967318
RP11-16D22.2	BCAS1	0.980049
RP11-16D22.2	PCP4	0.978434
RP11-16D22.2	HEPACAM2	0.989414
RP11-16D22.2	RNF183	0.992602
RP11-16D22.2	BPIFB1	0.98557
RP11-16D22.2	AC138517.1	0.989589
RP11-16D22.2	AGR2	0.998276
RP11-16D22.2	REG4	0.99552
RP11-16D22.2	CA10	0.985486
RP11-16D22.2	CGREF1	0.993758
RP11-16D22.2	DLK1	0.95293
RP11-16D22.2	GABRB1	0.980294
RP11-16D22.2	MFSD6L	0.977559
RP11-16D22.2	SPDEF	0.999005
RP11-16D22.2	MFSD4	0.972314
RP11-16D22.2	C9orf152	0.985672
RP11-16D22.2	TBX10	0.974566
RP11-16D22.2	SYTL5	0.976649
RP11-16D22.2	EFCAB4A	0.975985
RP11-16D22.2	CLDN3	0.97265
RP11-16D22.2	FAM3D	0.957787
RP11-16D22.2	RNASE4	0.951826
RP11-16D22.2	SLC44A4	0.995426
RP11-16D22.2	C21orf88	0.995729
RP11-16D22.2	SLC12A2	0.976355
RP11-16D22.2	PRH1	0.979018
RP11-16D22.2	SCGB3A1	0.987301
RP11-16D22.2	CHAD	0.961469
RP11-16D22.2	ARMC3	0.994598
RP11-16D22.2	CDH12	0.997073
RP11-16D22.2	LCN1	0.972233
RP11-16D22.2	DPY19L3	0.953493
RP11-16D22.2	TFF1	0.996952
RP11-16D22.2	EDN3	0.956844
RP11-16D22.2	PRB3	0.95382
RP11-16D22.2	MLPH	0.974537
RP11-16D22.2	GRIA2	0.991562
RP11-16D22.2	KIAA1324	0.9781
RP11-16D22.2	SCGB1D2	0.984691
RP11-16D22.2	MUC16	0.989224
RP11-16D22.2	ERN2	0.97
RP11-16D22.2	TFF2	0.995507
RP11-16D22.2	FOXA3	0.995075
RP11-16D22.2	TTC6	0.986933
RP11-16D22.2	PPP1R1B	0.95221
RP11-16D22.2	MUC5B	0.99893
RP11-16D22.2	NUPR1L	0.977609
RP11-16D22.2	GNMT	0.993148
RP11-16D22.2	PDE8B	0.987109
RP11-16D22.2	BPIFB2	0.998138
RP11-16D22.2	CHRM1	0.97002
RP11-16D22.2	SIM2	0.973873
RP11-16D22.2	TAAR1	0.990212
RP11-16D22.2	ST6GALNAC1	0.99283
RP11-16D22.2	FAM177B	0.990491
RP11-16D22.2	LRRIQ4	0.982634
RP11-16D22.2	SSTR5	0.987734
RP11-16D22.2	NWD1	0.981191
RP11-16D22.2	GJB1	0.995764
RP11-16D22.2	STAC2	0.985917
RP11-16D22.2	KIAA1147	0.950468
RP11-16D22.2	AQP5	0.974689
RP11-16D22.2	PANX3	0.990366
RP11-16D22.2	ENTPD8	0.994573
RP11-16D22.2	TOX3	0.973237
RP11-16D22.2	EPHA5	0.976347
RP11-16D22.2	KIAA1244	0.994316
RP11-16D22.2	PABPC1L2A	0.997528
RP11-16D22.2	IGSF5	0.971211
RP11-16D22.2	HMGCS2	0.997216
RP11-16D22.2	CGNL1	0.960578
RP11-16D22.2	TSPAN12	0.991821
RP11-16D22.2	KRT7	0.984433
RP11-16D22.2	ADAL	0.973793
RP11-16D22.2	DACH2	0.990018
RP11-16D22.2	DMBT1	0.969653
RP11-16D22.2	PRR15	0.953186
RP11-16D22.2	TSPAN1	0.979554
RP11-16D22.2	CXXC4	0.983934
RP13-726E6.1	NXPE2	0.973716
RP13-726E6.1	ALDH1L1	0.954783
RP13-726E6.1	CHRM3	0.950053
RP13-726E6.1	PABPC1L2B	0.963729
RP13-726E6.1	ERBB4	0.972285
RP13-726E6.1	FAM3B	0.958275
RP13-726E6.1	PDE4D	0.957383
RP13-726E6.1	LPPR1	0.963249
RP13-726E6.1	VSIG2	0.961355
RP13-726E6.1	DNAJC22	0.964823
RP13-726E6.1	SEMA3E	0.956336
RP13-726E6.1	GALNT4	0.953194
RP13-726E6.1	FOXA1	0.961256
RP13-726E6.1	B3GALT5	0.970805
RP13-726E6.1	PSG3	0.950426
RP13-726E6.1	WIF1	0.977668
RP13-726E6.1	SMIM1	0.954308
RP13-726E6.1	CDR1	0.966942
RP13-726E6.1	LRRC31	0.962888
RP13-726E6.1	PBOV1	0.967546
RP13-726E6.1	ALDH1A1	0.964063
RP13-726E6.1	CREB3L4	0.960269
RP13-726E6.1	MDGA2	0.964599
RP13-726E6.1	SMIM22	0.958807
RP13-726E6.1	POC1B-GALNT4	0.953194
RP13-726E6.1	AGFG2	0.961163
RP13-726E6.1	SCGB2A1	0.950098
RP13-726E6.1	CLDN10	0.959394
RP13-726E6.1	NKX3-1	0.959207
RP13-726E6.1	SLC26A2	0.957006
RP13-726E6.1	B3GNT6	0.961479
RP13-726E6.1	LDLRAD1	0.959386
RP13-726E6.1	AL163636.6	0.973557
RP13-726E6.1	CHPT1	0.975279
RP13-726E6.1	CCDC110	0.971205
RP13-726E6.1	PRR15L	0.969688
RP13-726E6.1	TFF3	0.959549
RP13-726E6.1	GP2	0.973373
RP13-726E6.1	TMEM178A	0.96768
RP13-726E6.1	NKX2-6	0.9716
RP13-726E6.1	ETV1	0.956772
RP13-726E6.1	CAPN9	0.976437
RP13-726E6.1	NXPE4	0.958372
RP13-726E6.1	CHST9	0.972737
RP13-726E6.1	BCAS1	0.9734
RP13-726E6.1	PCP4	0.97326
RP13-726E6.1	HEPACAM2	0.953482
RP13-726E6.1	RNF183	0.953042
RP13-726E6.1	AC138517.1	0.961509
RP13-726E6.1	AGR2	0.970819
RP13-726E6.1	REG4	0.961185
RP13-726E6.1	CA10	0.980108
RP13-726E6.1	SYCP3	0.974095
RP13-726E6.1	CGREF1	0.974289
RP13-726E6.1	RORC	0.973564
RP13-726E6.1	GABRB1	0.954801
RP13-726E6.1	MFSD6L	0.971565
RP13-726E6.1	SPDEF	0.967337
RP13-726E6.1	MFSD4	0.965735
RP13-726E6.1	C9orf152	0.978147
RP13-726E6.1	SYTL5	0.961095
RP13-726E6.1	EFCAB4A	0.966542
RP13-726E6.1	TCEAL2	0.955673
RP13-726E6.1	CLDN3	0.961734
RP13-726E6.1	FAM3D	0.974431
RP13-726E6.1	RNASE4	0.972028
RP13-726E6.1	SLC44A4	0.973196
RP13-726E6.1	PLEKHB1	0.960097
RP13-726E6.1	C21orf88	0.973106
RP13-726E6.1	GALNT12	0.971008
RP13-726E6.1	SCGB3A1	0.970148
RP13-726E6.1	CHAD	0.963669
RP13-726E6.1	ARMC3	0.960195
RP13-726E6.1	CDH12	0.972029
RP13-726E6.1	TFF1	0.959327
RP13-726E6.1	TCEA3	0.965126
RP13-726E6.1	MLPH	0.978598
RP13-726E6.1	GRIA2	0.972114
RP13-726E6.1	KIAA1324	0.968625
RP13-726E6.1	SCGB1D2	0.952307
RP13-726E6.1	MUC16	0.954695
RP13-726E6.1	ERN2	0.964494
RP13-726E6.1	TFF2	0.955856
RP13-726E6.1	FOXA3	0.9638
RP13-726E6.1	TTC6	0.980951
RP13-726E6.1	PPP1R1B	0.961548
RP13-726E6.1	MUC5B	0.966463
RP13-726E6.1	SYCP1	0.956918
RP13-726E6.1	NUPR1L	0.983106
RP13-726E6.1	GNMT	0.968265
RP13-726E6.1	PDE8B	0.974797
RP13-726E6.1	BPIFB2	0.962836
RP13-726E6.1	CHRM1	0.966854
RP13-726E6.1	ST6GALNAC1	0.959518
RP13-726E6.1	ANG	0.978962
RP13-726E6.1	FAM177B	0.978394
RP13-726E6.1	NWD1	0.953282
RP13-726E6.1	GJB1	0.972898
RP13-726E6.1	STAC2	0.950939
RP13-726E6.1	AQP5	0.967934
RP13-726E6.1	ENTPD8	0.975961
RP13-726E6.1	TOX3	0.984231
RP13-726E6.1	EPHA5	0.975583
RP13-726E6.1	KIAA1244	0.978016
RP13-726E6.1	PABPC1L2A	0.961043
RP13-726E6.1	IGSF5	0.96804
RP13-726E6.1	HMGCS2	0.967444
RP13-726E6.1	CGNL1	0.988972
RP13-726E6.1	TSPAN12	0.975723
RP13-726E6.1	KRT7	0.969245
RP13-726E6.1	CTNND2	0.963961
RP13-726E6.1	TSPAN8	0.9662
RP13-726E6.1	BEND7	0.951941
RP13-726E6.1	DMBT1	0.959888
AP000235.3	KLRF2	0.95232
AP000235.3	GLCCI1	0.95151
AP000235.3	PIM2	0.950599
AP000235.3	MZB1	0.951687
AP000235.3	CH17-132F21.1	0.957793
RP11-99H20.1	ERC2	0.965504
RP11-99H20.1	DACT2	0.957144
AC002331.1	TNIP3	0.954666
RP11-765K14.1	NIF3L1	0.956355
RP11-141J13.5	SPTB	0.96007
CTD-2619J13.13	AC012313.1	0.95651
RP11-265N7.2	C15orf54	0.969523
RP11-749H20.4	ANKRD45	0.959674
RP11-749H20.4	TMC3	0.962253
RP11-749H20.4	RP11-1070N10.3	0.953552
RP11-749H20.4	IGLL1	0.954439
RP11-749H20.4	DCC	0.951366
RP11-749H20.4	CLEC2A	0.959764
RP11-749H20.4	RP11-553A10.1	0.954072
RP11-397A16.2	NELL2	0.974398
RP11-486O13.4	ADAM20	0.979313
RP11-578F21.6	GOLGA8M	0.991284
RP11-578F21.6	C10orf112	0.956883
RP11-9G1.3	PCDH10	0.98961
LINC00992	SERPINI2	0.951358
RP11-212I21.4	RAD51AP1	0.959143
RP11-212I21.4	PPFIBP1	0.954149
RP11-212I21.4	PBX3	0.962837
RP11-497E19.1	SPECC1	0.96379
RP11-497E19.1	PTPDC1	0.958352
AC018799.1	MTNR1A	0.953929
AC018799.1	HSD17B3	0.960291
RP11-171I2.3	PTPRQ	0.982249
RP11-171I2.3	OTOGL	0.991264
RP11-171I2.3	ANKRD39	0.952348
RP11-171I2.3	C10orf71	0.955158
RP11-171I2.3	MYF6	0.950649
RP11-171I2.3	CTNNA3	0.950202
RP11-171I2.3	CSRP3	0.967039
RP11-171I2.3	TRDN	0.961197
RP11-758N13.1	GREM1	0.981136
RP11-758N13.1	CCL7	0.976764
CTC-537E7.3	NXPE2	0.986283
CTC-537E7.3	PABPC1L2B	0.988831
CTC-537E7.3	ERBB4	0.964248
CTC-537E7.3	PDE4D	0.975065
CTC-537E7.3	LPPR1	0.983029
CTC-537E7.3	VSIG2	0.982961
CTC-537E7.3	GOLM1	0.981553
CTC-537E7.3	DNAJC22	0.985209
CTC-537E7.3	SEMA3E	0.970736
CTC-537E7.3	GALNT4	0.978591
CTC-537E7.3	C1QTNF8	0.980112
CTC-537E7.3	B3GALT5	0.991242
CTC-537E7.3	WIF1	0.975082
CTC-537E7.3	SMIM1	0.981323
CTC-537E7.3	CDR1	0.989377
CTC-537E7.3	ITLN1	0.981299
CTC-537E7.3	LRRC31	0.988316
CTC-537E7.3	PBOV1	0.980124
CTC-537E7.3	PTF1A	0.982145
CTC-537E7.3	ALDH1A1	0.966912
CTC-537E7.3	CREB3L4	0.975864
CTC-537E7.3	MDGA2	0.98961
CTC-537E7.3	SMIM22	0.958279
CTC-537E7.3	POC1B-GALNT4	0.978592
CTC-537E7.3	SCGB2A1	0.984241
CTC-537E7.3	CLDN10	0.989736
CTC-537E7.3	NKX3-1	0.988187
CTC-537E7.3	SLC26A2	0.950176
CTC-537E7.3	B3GNT6	0.987247
CTC-537E7.3	LDLRAD1	0.985829
CTC-537E7.3	AL163636.6	0.953923
CTC-537E7.3	UGT2B28	0.966785
CTC-537E7.3	CHPT1	0.950672
CTC-537E7.3	CCDC110	0.980366
CTC-537E7.3	BPIFA2	0.952689
CTC-537E7.3	PRR15L	0.986885
CTC-537E7.3	TFF3	0.987751
CTC-537E7.3	PAX1	0.955849
CTC-537E7.3	GP2	0.985013
CTC-537E7.3	TMEM178A	0.989921
CTC-537E7.3	NKX2-6	0.972468
CTC-537E7.3	ETV1	0.993187
CTC-537E7.3	AGR3	0.953924
CTC-537E7.3	CAPN9	0.985195
CTC-537E7.3	MS4A8	0.978292
CTC-537E7.3	NXPE4	0.989879
CTC-537E7.3	CHST9	0.959062
CTC-537E7.3	BCAS1	0.970112
CTC-537E7.3	PCP4	0.96981
CTC-537E7.3	HEPACAM2	0.981149
CTC-537E7.3	RNF183	0.984304
CTC-537E7.3	BPIFB1	0.97067
CTC-537E7.3	AC138517.1	0.987182
CTC-537E7.3	AGR2	0.987281
CTC-537E7.3	REG4	0.986914
CTC-537E7.3	CA10	0.980195
CTC-537E7.3	CGREF1	0.982701
CTC-537E7.3	GABRB1	0.983827
CTC-537E7.3	MFSD6L	0.979929
CTC-537E7.3	SPDEF	0.988392
CTC-537E7.3	MFSD4	0.969082
CTC-537E7.3	C9orf152	0.982439
CTC-537E7.3	TBX10	0.968301
CTC-537E7.3	SYTL5	0.974653
CTC-537E7.3	EFCAB4A	0.962803
CTC-537E7.3	TCEAL2	0.950415
CTC-537E7.3	CLDN3	0.953211
CTC-537E7.3	RNASE4	0.953149
CTC-537E7.3	SLC44A4	0.984253
CTC-537E7.3	C21orf88	0.988769
CTC-537E7.3	SLC12A2	0.966529
CTC-537E7.3	PRH1	0.965968
CTC-537E7.3	GALNT12	0.950819
CTC-537E7.3	SCGB3A1	0.975225
CTC-537E7.3	ARMC3	0.985846
CTC-537E7.3	CDH12	0.993172
CTC-537E7.3	LCN1	0.955507
CTC-537E7.3	DPY19L3	0.95744
CTC-537E7.3	TFF1	0.987803
CTC-537E7.3	EDN3	0.957127
CTC-537E7.3	TCEA3	0.953659
CTC-537E7.3	MLPH	0.96553
CTC-537E7.3	GRIA2	0.980033
CTC-537E7.3	KIAA1324	0.965223
CTC-537E7.3	SCGB1D2	0.966206
CTC-537E7.3	MUC16	0.976508
CTC-537E7.3	ERN2	0.955988
CTC-537E7.3	TFF2	0.986404
CTC-537E7.3	FOXA3	0.989167
CTC-537E7.3	TTC6	0.975793
CTC-537E7.3	MUC5B	0.989032
CTC-537E7.3	NUPR1L	0.967133
CTC-537E7.3	GNMT	0.973628
CTC-537E7.3	PDE8B	0.982358
CTC-537E7.3	BPIFB2	0.988632
CTC-537E7.3	CHRM1	0.957805
CTC-537E7.3	SIM2	0.954046
CTC-537E7.3	TAAR1	0.982145
CTC-537E7.3	ST6GALNAC1	0.985919
CTC-537E7.3	ANG	0.957187
CTC-537E7.3	FAM177B	0.984432
CTC-537E7.3	LRRIQ4	0.975707
CTC-537E7.3	SSTR5	0.98415
CTC-537E7.3	NWD1	0.98063
CTC-537E7.3	GJB1	0.984245
CTC-537E7.3	STAC2	0.969729
CTC-537E7.3	KIAA1147	0.962099
CTC-537E7.3	AQP5	0.962242
CTC-537E7.3	PANX3	0.984924
CTC-537E7.3	ENTPD8	0.992848
CTC-537E7.3	TOX3	0.970867
CTC-537E7.3	EPHA5	0.967235
CTC-537E7.3	KIAA1244	0.983696
CTC-537E7.3	PABPC1L2A	0.988267
CTC-537E7.3	IGSF5	0.972729
CTC-537E7.3	HMGCS2	0.990975
CTC-537E7.3	CGNL1	0.954018
CTC-537E7.3	TSPAN12	0.986789
CTC-537E7.3	KRT7	0.97043
CTC-537E7.3	ADAL	0.968194
CTC-537E7.3	DACH2	0.985551
CTC-537E7.3	DMBT1	0.95134
CTC-537E7.3	PRR15	0.964608
CTC-537E7.3	TSPAN1	0.984115
CTC-537E7.3	CXXC4	0.993298
AC113617.1	SHC4	0.981523
AC113617.1	NTNG1	0.991602
LINC00269	KRT37	0.963401
RP11-2A4.3	LRP1B	0.976475
RP11-2A4.3	SLC4A4	0.967459
RP11-2A4.3	RP11-1102P16.1	0.982032
RP11-2A4.3	LRFN2	0.959318
RP11-2A4.3	VWC2	0.99091
RP11-2A4.3	PAK7	0.957401
RP11-2A4.3	GSTA1	0.96765
RP11-2A4.3	MAOB	0.963696
RP11-2A4.3	SGCZ	0.95511
RP11-2A4.3	DBX2	0.96572
RP11-2A4.3	FAM154A	0.957369
RP11-2A4.3	ENHO	0.963912
RP11-2A4.3	AR	0.951786
RP11-2A4.3	EDA	0.955912
RP11-2A4.3	OCA2	0.951378
RP11-2A4.3	WNK4	0.974319
RP3-340B19.3	NXPE2	0.968566
RP3-340B19.3	CHRM3	0.960349
RP3-340B19.3	PDE4D	0.950199
RP3-340B19.3	LPPR1	0.960784
RP3-340B19.3	DNAJC22	0.951315
RP3-340B19.3	B3GALT5	0.958747
RP3-340B19.3	WIF1	0.954313
RP3-340B19.3	CDR1	0.956146
RP3-340B19.3	PBOV1	0.963137
RP3-340B19.3	CREB3L4	0.950386
RP3-340B19.3	SMIM22	0.952308
RP3-340B19.3	CCDC110	0.95867
RP3-340B19.3	GP2	0.964936
RP3-340B19.3	NKX2-6	0.972142
RP3-340B19.3	CAPN9	0.966666
RP3-340B19.3	BCAS1	0.960021
RP3-340B19.3	PCP4	0.966967
RP3-340B19.3	AGR2	0.961143
RP3-340B19.3	CGREF1	0.957414
RP3-340B19.3	SPDEF	0.954972
RP3-340B19.3	C9orf152	0.958106
RP3-340B19.3	TBX10	0.95222
RP3-340B19.3	EFCAB4A	0.95612
RP3-340B19.3	FAM3D	0.962935
RP3-340B19.3	SLC44A4	0.964296
RP3-340B19.3	PLEKHB1	0.951423
RP3-340B19.3	C21orf88	0.966474
RP3-340B19.3	SCGB3A1	0.968226
RP3-340B19.3	CHAD	0.965504
RP3-340B19.3	CDH12	0.959617
RP3-340B19.3	MLPH	0.971118
RP3-340B19.3	GRIA2	0.970946
RP3-340B19.3	KIAA1324	0.971979
RP3-340B19.3	PSG8	0.967586
RP3-340B19.3	ERN2	0.967691
RP3-340B19.3	TTC6	0.966553
RP3-340B19.3	ARHGEF38	0.952568
RP3-340B19.3	PPP1R1B	0.960575
RP3-340B19.3	MUC5B	0.952651
RP3-340B19.3	NUPR1L	0.971686
RP3-340B19.3	GNMT	0.954084
RP3-340B19.3	PDE8B	0.955527
RP3-340B19.3	CHRM1	0.971902
RP3-340B19.3	CLDN22	0.952521
RP3-340B19.3	FAM177B	0.951877
RP3-340B19.3	GJB1	0.955599
RP3-340B19.3	AQP5	0.964565
RP3-340B19.3	ENTPD8	0.956474
RP3-340B19.3	TOX3	0.963052
RP3-340B19.3	EPHA5	0.951776
RP3-340B19.3	KIAA1244	0.965373
RP3-340B19.3	IGSF5	0.9691
RP3-340B19.3	CRISP3	0.961118
RP3-340B19.3	CGNL1	0.957671
RP3-340B19.3	TSPAN12	0.956486
RP3-340B19.3	KRT7	0.955816
RP3-340B19.3	DMBT1	0.968742
RP3-340B19.3	TSPAN1	0.960709
RP3-340B19.3	CXXC4	0.962775
CTB-43E15.2	IGLL5	0.963562
CTB-43E15.2	ANKRD45	0.950336
CTB-43E15.2	FAM92B	0.952139
CTB-43E15.2	MZB1	0.951002
CTB-43E15.2	TMC3	0.953158
CTB-43E15.2	C12orf55	0.967458
CTB-43E15.2	IGLL1	0.951661
CTB-43E15.2	TPTE2	0.95295
CTB-43E15.2	RP11-553A10.1	0.952825
CTB-43E15.2	ACOXL	0.971503
RP11-536N17.1	HBEGF	0.95112
RP11-536N17.1	ZFP36	0.95388
AC011891.5	SLITRK5	0.955703
AC011891.5	ALDH1A1	0.951506
AC011891.5	SLC26A2	0.969723
AC011891.5	AL163636.6	0.962114
AC011891.5	CHPT1	0.950164
AC011891.5	CA10	0.956268
AC011891.5	SYCP3	0.952742
AC011891.5	RNASE4	0.962424
AC011891.5	GALNT12	0.962186
AC011891.5	MAATS1	0.961532
AC011891.5	ANG	0.966275
AC011891.5	TSPAN8	0.950444
CTB-43E15.3	KLRF2	0.960826
CTB-43E15.3	BLOC1S5-TXNDC5	0.976803
CTB-43E15.3	IGLL5	0.986565
CTB-43E15.3	KIAA0125	0.986556
CTB-43E15.3	PIM2	0.989146
CTB-43E15.3	TXNDC11	0.95225
CTB-43E15.3	MIXL1	0.984557
CTB-43E15.3	ANKRD45	0.97204
CTB-43E15.3	IL5RA	0.965269
CTB-43E15.3	SEL1L	0.959318
CTB-43E15.3	FAM92B	0.979977
CTB-43E15.3	MZB1	0.987376
CTB-43E15.3	TNFRSF17	0.976777
CTB-43E15.3	FAM46C	0.970964
CTB-43E15.3	TMC3	0.963621
CTB-43E15.3	C12orf55	0.990644
CTB-43E15.3	POU2AF1	0.95602
CTB-43E15.3	IGLL1	0.980785
CTB-43E15.3	NLRP14	0.956952
CTB-43E15.3	AF165138.7	0.965343
CTB-43E15.3	RP11-685N3.1	0.983606
CTB-43E15.3	TXNDC5	0.97668
CTB-43E15.3	CLEC2A	0.970478
CTB-43E15.3	TPTE2	0.974831
CTB-43E15.3	FCRL5	0.98807
CTB-43E15.3	SPAG4	0.968641
CTB-43E15.3	TP53INP1	0.970511
CTB-43E15.3	PNOC	0.951083
CTB-43E15.3	RP11-553A10.1	0.971972
CTB-43E15.3	ACOXL	0.995819
CTB-43E15.3	LAX1	0.967002
CTB-43E15.3	DERL3	0.977688
CTB-43E15.3	CH17-132F21.1	0.966718
AC078941.1	MUC19	0.95224
AC078941.1	MUC7	0.953594
AC078941.1	C4orf40	0.953379
AC078941.1	HTN1	0.952807
AC078941.1	LACRT	0.95317
AC078941.1	C6orf58	0.955775
AC078941.1	PROL1	0.956054
AC018359.3	NXPE2	0.951318
AC018359.3	CHRM3	0.962743
AC018359.3	FOXA1	0.961685
AC018359.3	CHDH	0.952984
AC018359.3	GP2	0.951902
AC018359.3	NKX2-6	0.964195
AC018359.3	CAPN9	0.95519
AC018359.3	CHST9	0.954639
AC018359.3	BCAS1	0.957224
AC018359.3	PCP4	0.965936
AC018359.3	C9orf152	0.957027
AC018359.3	TBX10	0.95665
AC018359.3	EFCAB4A	0.963348
AC018359.3	FAM3D	0.95412
AC018359.3	PLEKHB1	0.9583
AC018359.3	SCGB3A1	0.954878
AC018359.3	CHAD	0.970793
AC018359.3	MLPH	0.96745
AC018359.3	GRIA2	0.956358
AC018359.3	KIAA1324	0.966854
AC018359.3	ERN2	0.963997
AC018359.3	TTC6	0.968185
AC018359.3	ARHGEF38	0.951829
AC018359.3	PPP1R1B	0.968413
AC018359.3	SYCP1	0.952079
AC018359.3	NUPR1L	0.962336
AC018359.3	CHRM1	0.967379
AC018359.3	FAM177B	0.962568
AC018359.3	AQP5	0.953699
AC018359.3	TOX3	0.967498
AC018359.3	EPHA5	0.968001
AC018359.3	KIAA1244	0.955611
AC018359.3	CRISP3	0.958594
AC018359.3	CGNL1	0.967713
AC018359.3	DMBT1	0.95123
RP11-826N14.4	PABPC1L2B	0.962134
RP11-826N14.4	VSIG2	0.966939
RP11-826N14.4	C1QTNF8	0.963108
RP11-826N14.4	B3GALT5	0.95538
RP11-826N14.4	WIF1	0.950073
RP11-826N14.4	CDR1	0.956156
RP11-826N14.4	ITLN1	0.953307
RP11-826N14.4	LRRC31	0.962342
RP11-826N14.4	PTF1A	0.966286
RP11-826N14.4	GAL3ST2	0.95521
RP11-826N14.4	ALDH1A1	0.960543
RP11-826N14.4	CREB3L4	0.96198
RP11-826N14.4	MDGA2	0.960885
RP11-826N14.4	SCGB2A1	0.965912
RP11-826N14.4	CLDN10	0.961886
RP11-826N14.4	NKX3-1	0.963132
RP11-826N14.4	SLC26A2	0.961617
RP11-826N14.4	B3GNT6	0.966424
RP11-826N14.4	LDLRAD1	0.967323
RP11-826N14.4	UGT2B28	0.971633
RP11-826N14.4	PRR15L	0.958427
RP11-826N14.4	TFF3	0.964586
RP11-826N14.4	PAX1	0.981263
RP11-826N14.4	TMEM178A	0.966838
RP11-826N14.4	ETV1	0.96598
RP11-826N14.4	MS4A8	0.964425
RP11-826N14.4	NXPE4	0.959226
RP11-826N14.4	HEPACAM2	0.965183
RP11-826N14.4	RNF183	0.966576
RP11-826N14.4	AC138517.1	0.950568
RP11-826N14.4	AGR2	0.952603
RP11-826N14.4	REG4	0.965743
RP11-826N14.4	CA10	0.961329
RP11-826N14.4	CGREF1	0.952601
RP11-826N14.4	MFSD6L	0.964584
RP11-826N14.4	SPDEF	0.957848
RP11-826N14.4	MFSD4	0.957712
RP11-826N14.4	SYTL5	0.957954
RP11-826N14.4	C21orf88	0.953319
RP11-826N14.4	ARMC3	0.966964
RP11-826N14.4	CDH12	0.95113
RP11-826N14.4	TFF1	0.964134
RP11-826N14.4	PRB3	0.958405
RP11-826N14.4	TFF2	0.965061
RP11-826N14.4	FOXA3	0.967272
RP11-826N14.4	MUC5B	0.960072
RP11-826N14.4	BPIFB2	0.962654
RP11-826N14.4	SIM2	0.975892
RP11-826N14.4	TAAR1	0.966286
RP11-826N14.4	ST6GALNAC1	0.969402
RP11-826N14.4	SSTR5	0.962583
RP11-826N14.4	PANX3	0.965796
RP11-826N14.4	ENTPD8	0.954915
RP11-826N14.4	PABPC1L2A	0.963612
RP11-826N14.4	HMGCS2	0.958881
RP11-826N14.4	TSPAN12	0.958534
RP11-826N14.4	ADAL	0.950156
RP11-826N14.4	DACH2	0.964757
RP11-711K1.8	PRB2	0.974335
RP11-711K1.8	PRB1	0.967704
RP11-526A4.1	ULK1	0.954857
RP11-526A4.1	PMFBP1	0.96564
RP11-526A4.1	SLC6A11	0.952874
RP11-526A4.1	STON2	0.955324
RP11-526A4.1	CNTN1	0.960048
CTC-559E9.4	ZNF506	0.997841
RP11-547C5.1	ITGB6	0.956255
RP11-774D14.1	RP11-1084J3.4	0.979858
RP5-1011O1.3	RGS21	0.957681
RP11-523G9.3	ERBB4	0.960649
RP11-523G9.3	ENPP5	0.961583
RP11-523G9.3	NOL4	0.956249
RP11-523G9.3	CHST9	0.957428
RP11-523G9.3	CPE	0.954568
RP11-523G9.3	GRIK3	0.962306
RP11-523G9.3	SMAD9	0.964626
RP11-523G9.3	CTNND2	0.954382
RP11-1028N23.3	SPC25	0.958973
RP1-153P14.8	PIK3CG	0.950267
RP1-153P14.8	TAGAP	0.957714
RP1-153P14.8	CYTIP	0.958417
RP1-153P14.8	GPR15	0.955463
CTD-2291D10.4	ZNF730	0.960348
AC073257.2	SLC4A4	0.959751
AC073257.2	EPHA6	0.967747
AC073257.2	ASTN1	0.961911
AC073257.2	NLGN1	0.950041
AC073257.2	SGCZ	0.963661
AC073257.2	SIAH3	0.968874
AC073257.2	GRID2	0.970947
AC073257.2	AC010368.2	0.965504
AC073257.2	FAM71A	0.952005
AC073257.2	KCNIP4	0.962169
AC073257.2	CES1	0.967489
RP11-158D2.2	FRG2	0.952641
RP11-158D2.2	PPP2R3B	0.962554
RP11-459K23.2	FAM92B	0.951908
RP11-459K23.2	TNFRSF17	0.962538
RP11-459K23.2	SPAG4	0.957002
RP4-781K5.4	ACSS2	0.951239
RP11-678G14.3	OCA2	0.958884
AC078842.4	RP11-1102P16.1	0.965386
AC078842.4	NPPC	0.954419
AC078842.4	PTN	0.99467
AC078842.4	DBX2	0.952641
AC078842.4	CTD-2049J23.3	0.95204
AC078842.4	FGF12	0.965291
AC078842.4	OCA2	0.972943
AC010090.1	SLC4A4	0.957159
AC010090.1	LRFN2	0.958997
AC010090.1	C6orf99	0.951744
AC010090.1	SGCZ	0.962066
AC010090.1	SIAH3	0.967038
AC010090.1	GRID2	0.958164
AC010090.1	AC010368.2	0.95166
AC010090.1	FAM71A	0.960127
AC123023.1	AFF3	0.954282
AC007461.2	NOL4	0.950874
CASC15	LAMB1	0.965452
CASC15	HOXC9	0.960861
RP11-781A6.1	LRP1B	0.953627
RP11-781A6.1	SLC4A4	0.975741
RP11-781A6.1	EPHA6	0.953777
RP11-781A6.1	PPAP2B	0.9582
RP11-781A6.1	GRM7	0.955826
RP11-781A6.1	NLGN1	0.962268
RP11-781A6.1	SGCZ	0.960272
RP11-781A6.1	TENM1	0.960496
RP11-781A6.1	SIAH3	0.951795
RP11-781A6.1	NCAM2	0.957194
RP11-781A6.1	GRID2	0.966373
RP11-781A6.1	AR	0.972212
RP11-781A6.1	DLGAP1	0.962797
RP11-781A6.1	WNK4	0.952918
CTA-929C8.5	LRRC3B	0.978473
CTA-929C8.5	SCN1A	0.962444
CTA-929C8.5	CD5L	0.955538
CTA-929C8.5	KRT76	0.973892
CTA-929C8.5	AC018512.1	0.987379
CTA-929C8.5	KRT3	0.972494
CTC-264K15.6	HSPB6	0.954451
CTC-264K15.6	SPTB	0.95332
CTC-264K15.6	SRL	0.96072
CTC-264K15.6	SCN4A	0.963182
CTC-264K15.6	PF4	0.96103
RP11-118B22.4	PZP	0.951855
RP11-171A24.2	AC008372.1	0.958457
RP11-171A24.2	CT62	0.955217
RP3-430N8.11	NMT1	0.958614
RP11-215N21.1	ASIC5	0.950888
RP11-215N21.1	EGFR	0.958311
RP11-215N21.1	ZNF713	0.969206
RP11-215N21.1	LANCL2	0.956593
RP11-215N21.1	SUMF2	0.961018
RP11-215N21.1	IGFL2	0.954298
RP11-215N21.1	KIAA1239	0.953734
RP11-215N21.1	LYPD8	0.982812
RP11-215N21.1	FER1L6	0.961141
RP11-215N21.1	MRPS17	0.954389
RP11-507B12.2	HOGA1	0.961727
RP11-507B12.2	B3GALT1	0.966681
RP11-507B12.2	PFKFB1	0.957254
RP11-507B12.2	LMOD2	0.970386
RP11-507B12.2	TRIM63	0.973041
RP11-507B12.2	FITM1	0.955876
RP11-507B12.2	MYL3	0.996273
RP11-507B12.2	SMCO1	0.976193
RP11-507B12.2	LAMA2	0.969754
RP11-507B12.2	PLN	0.975813
RP11-507B12.2	RASD1	0.953905
RP11-507B12.2	MYOZ1	0.953577
RP11-507B12.2	FKBP5	0.971899
RP11-507B12.2	FABP3	0.983753
RP11-507B12.2	MYL2	0.98642
RP11-507B12.2	HBB	0.971756
RP11-507B12.2	DHRS7C	0.980682
RP11-507B12.2	ASB15	0.9539
RP11-507B12.2	BPIFA1	0.974515
RP11-507B12.2	C20orf26	0.971715
RP11-507B12.2	KLF15	0.962538
RP11-507B12.2	PDK4	0.99254
RP11-507B12.2	MYLK4	0.957986
RP11-507B12.2	S100A1	0.978396
RP11-507B12.2	TECRL	0.973864
RP11-507B12.2	HBA2	0.971015
RP11-507B12.2	HEMGN	0.961554
RP11-507B12.2	HBA1	0.971944
RP11-507B12.2	ZBTB16	0.985501
RP11-507B12.2	DSCR4	0.985148
RP11-507B12.2	MYOZ2	0.959163
RP11-507B12.2	FABP7	0.97717
RP11-507B12.2	TNNC1	0.953438
RP11-507B12.2	MB	0.951668
RP11-453F18__B.1	TSPAN9	0.965094
RP11-453F18__B.1	CSMD2	0.954177
RP11-453F18__B.1	CLN5	0.958104
RP11-453F18__B.1	MMP11	0.953415
RP11-453F18__B.1	SPSB4	0.977762
RP11-453F18__B.1	SLC13A5	0.971976
RP11-453F18__B.1	PLAC1	0.95248
RP11-453F18__B.1	MYCBP2	0.96019
RP11-453F18__B.1	FBXL3	0.957447
RP11-453F18__B.1	GRM4	0.955653
RP11-453F18__B.1	EML5	0.969085
RP11-453F18__B.1	NXPH4	0.961725
RP11-453F18__B.1	ST8SIA2	0.961047
RP11-700N1.1	LMOD2	0.951751
RP11-700N1.1	MT1A	0.977183
RP11-700N1.1	MTRNR2L1	0.972176
RP11-700N1.1	TRIM63	0.952311
RP11-700N1.1	SH3BGR	0.964856
RP11-700N1.1	MT1M	0.978291
RP11-700N1.1	HBB	0.957376
RP11-700N1.1	AP002353.1	0.967126
RP11-700N1.1	ABRA	0.967662
RP11-700N1.1	MYOZ2	0.972355
LINC00492	SLCO6A1	0.986663
RP11-269F21.2	ASIC5	0.973241
RP11-269F21.2	EGFR	0.975172
RP11-269F21.2	GBAS	0.968195
RP11-269F21.2	ZNF713	0.982043
RP11-269F21.2	LANCL2	0.986562
RP11-269F21.2	GAST	0.992024
RP11-269F21.2	SUMF2	0.97155
RP11-269F21.2	KRT84	0.981826
RP11-269F21.2	ARL14	0.952982
RP11-269F21.2	CST6	0.965124
RP11-269F21.2	NDUFB3	0.961235
RP11-269F21.2	SEC61G	0.970652
RP11-269F21.2	KIAA1239	0.970198
RP11-269F21.2	CHCHD2	0.979891
RP11-269F21.2	FIGNL1	0.978237
RP11-269F21.2	LYPD8	0.985678
RP11-269F21.2	CALB1	0.991195
RP11-269F21.2	CCT6A	0.978224
RP11-269F21.2	INA	0.978479
RP11-269F21.2	FER1L6	0.969003
RP11-269F21.2	PSPH	0.954442
RP11-269F21.2	MRPS17	0.984542
RP11-518I13.1	NXPE2	0.982138
RP11-518I13.1	PABPC1L2B	0.996764
RP11-518I13.1	PDE4D	0.953423
RP11-518I13.1	LPPR1	0.958332
RP11-518I13.1	VSIG2	0.996288
RP11-518I13.1	GOLM1	0.985136
RP11-518I13.1	DNAJC22	0.966157
RP11-518I13.1	SEMA3E	0.958642
RP11-518I13.1	GALNT4	0.979764
RP11-518I13.1	C1QTNF8	0.997562
RP11-518I13.1	B3GALT5	0.991639
RP11-518I13.1	WIF1	0.978313
RP11-518I13.1	SMIM1	0.960216
RP11-518I13.1	CDR1	0.991795
RP11-518I13.1	ITLN1	0.99364
RP11-518I13.1	LRRC31	0.996974
RP11-518I13.1	PRH2	0.969392
RP11-518I13.1	PBOV1	0.966944
RP11-518I13.1	PTF1A	0.999497
RP11-518I13.1	GAL3ST2	0.971069
RP11-518I13.1	ALDH1A1	0.977286
RP11-518I13.1	CREB3L4	0.977592
RP11-518I13.1	MDGA2	0.996957
RP11-518I13.1	SMIM22	0.964537
RP11-518I13.1	POC1B-GALNT4	0.979764
RP11-518I13.1	SCGB2A1	0.999602
RP11-518I13.1	CLDN10	0.99734
RP11-518I13.1	NKX3-1	0.998308
RP11-518I13.1	B3GNT6	0.997809
RP11-518I13.1	LDLRAD1	0.997115
RP11-518I13.1	UGT2B28	0.982724
RP11-518I13.1	CCDC110	0.957365
RP11-518I13.1	BPIFA2	0.974425
RP11-518I13.1	PRR15L	0.989942
RP11-518I13.1	TFF3	0.998658
RP11-518I13.1	PAX1	0.982762
RP11-518I13.1	GP2	0.982108
RP11-518I13.1	TMEM178A	0.996523
RP11-518I13.1	NKX2-6	0.960177
RP11-518I13.1	ETV1	0.993999
RP11-518I13.1	AGR3	0.963492
RP11-518I13.1	VSTM2L	0.952176
RP11-518I13.1	CAPN9	0.977571
RP11-518I13.1	MS4A8	0.996168
RP11-518I13.1	NXPE4	0.982565
RP11-518I13.1	BCAS1	0.961258
RP11-518I13.1	PCP4	0.951532
RP11-518I13.1	HEPACAM2	0.996236
RP11-518I13.1	RNF183	0.999354
RP11-518I13.1	BPIFB1	0.988244
RP11-518I13.1	AC138517.1	0.987301
RP11-518I13.1	AGR2	0.98848
RP11-518I13.1	REG4	0.997937
RP11-518I13.1	CA10	0.978283
RP11-518I13.1	CGREF1	0.982798
RP11-518I13.1	GABRB1	0.98371
RP11-518I13.1	MFSD6L	0.976493
RP11-518I13.1	SPDEF	0.993316
RP11-518I13.1	MFSD4	0.967069
RP11-518I13.1	C9orf152	0.965841
RP11-518I13.1	TBX10	0.958511
RP11-518I13.1	SYTL5	0.976271
RP11-518I13.1	EFCAB4A	0.951058
RP11-518I13.1	CLDN3	0.951296
RP11-518I13.1	SLC44A4	0.982526
RP11-518I13.1	C21orf88	0.987133
RP11-518I13.1	SLC12A2	0.964275
RP11-518I13.1	PRH1	0.985903
RP11-518I13.1	SCGB3A1	0.96572
RP11-518I13.1	ARMC3	0.996613
RP11-518I13.1	CDH12	0.986986
RP11-518I13.1	LCN1	0.977748
RP11-518I13.1	DPY19L3	0.953479
RP11-518I13.1	TFF1	0.998495
RP11-518I13.1	PRB3	0.966523
RP11-518I13.1	GRIA2	0.971939
RP11-518I13.1	SCGB1D2	0.973624
RP11-518I13.1	MUC16	0.98208
RP11-518I13.1	TFF2	0.999272
RP11-518I13.1	FOXA3	0.997964
RP11-518I13.1	TTC6	0.965321
RP11-518I13.1	MUC5B	0.994924
RP11-518I13.1	NUPR1L	0.955791
RP11-518I13.1	GNMT	0.983967
RP11-518I13.1	PDE8B	0.972954
RP11-518I13.1	BPIFB2	0.997233
RP11-518I13.1	VIP	0.959873
RP11-518I13.1	SIM2	0.983159
RP11-518I13.1	TAAR1	0.999497
RP11-518I13.1	ST6GALNAC1	0.998044
RP11-518I13.1	FAM177B	0.976583
RP11-518I13.1	LRRIQ4	0.982735
RP11-518I13.1	SSTR5	0.997405
RP11-518I13.1	NWD1	0.978772
RP11-518I13.1	GJB1	0.98406
RP11-518I13.1	STAC2	0.981957
RP11-518I13.1	KIAA1147	0.953132
RP11-518I13.1	PANX3	0.998828
RP11-518I13.1	ENTPD8	0.989246
RP11-518I13.1	EPHA5	0.951195
RP11-518I13.1	KIAA1244	0.977807
RP11-518I13.1	PABPC1L2A	0.997997
RP11-518I13.1	IGSF5	0.952442
RP11-518I13.1	HMGCS2	0.995591
RP11-518I13.1	TSPAN12	0.982597
RP11-518I13.1	KRT7	0.965943
RP11-518I13.1	ADAL	0.986269
RP11-518I13.1	DACH2	0.998867
RP11-518I13.1	PRR15	0.957907
RP11-518I13.1	TSPAN1	0.976887
RP11-518I13.1	CXXC4	0.971559
RP11-90C4.2	SGCZ	0.953784
RP11-90C4.2	ENHO	0.954114
RP11-90C4.2	AC010368.2	0.962843
RP11-90C4.2	DLGAP1	0.952764
RP11-552E20.4	ETNK2	0.958437
RP11-1144P22.1	MRGPRX3	0.962453
CTC-254B4.1	B3GALT1	0.950485
CTC-254B4.1	LMOD2	0.97058
CTC-254B4.1	MT1A	0.964683
CTC-254B4.1	MTRNR2L1	0.980232
CTC-254B4.1	TRIM63	0.973321
CTC-254B4.1	SH3BGR	0.959803
CTC-254B4.1	LAMA2	0.958458
CTC-254B4.1	GRB14	0.95103
CTC-254B4.1	FKBP5	0.962997
CTC-254B4.1	MT1M	0.973346
CTC-254B4.1	HBB	0.956163
CTC-254B4.1	AP002353.1	0.960776
CTC-254B4.1	BPIFA1	0.968814
CTC-254B4.1	C20orf26	0.957925
CTC-254B4.1	ABRA	0.95649
CTC-254B4.1	TECRL	0.962027
CTC-254B4.1	AC026461.1	0.967694
CTC-254B4.1	C10orf10	0.954281
CTC-254B4.1	MYOZ2	0.985143
AC068491.2	PNKP	0.953205
AC068491.2	ACTN1	0.954749
AC019186.1	TCF24	0.973072
AC019186.1	POMT2	0.978625
RP4-794H19.4	GPR176	0.950223
RP4-794H19.4	IL11	0.964355
RP11-79N23.1	MBLAC2	0.950183
RP5-1051D14.1	IGLL5	0.954948
RP5-1051D14.1	KIAA0125	0.958362
RP5-1051D14.1	CD79A	0.985174
RP5-1051D14.1	SLC17A9	0.950026
RP5-1051D14.1	MEI1	0.976639
RP5-1051D14.1	FAM92B	0.958163
RP5-1051D14.1	MZB1	0.964218
RP5-1051D14.1	TNFRSF17	0.9672
RP5-1051D14.1	FAM46C	0.972865
RP5-1051D14.1	TMC3	0.96199
RP5-1051D14.1	BHLHA15	0.950539
RP5-1051D14.1	HERPUD1	0.953702
RP5-1051D14.1	RP11-685N3.1	0.950093
RP5-1051D14.1	NUGGC	0.961256
RP5-1051D14.1	FCRL5	0.969238
RP5-1051D14.1	RP11-553A10.1	0.952096
RP5-1051D14.1	CH17-132F21.1	0.958153
LINC00922	RTP3	0.959606
LINC00922	GP6	0.957683
LINC00922	UCHL3	0.951588
LINC00922	DHRSX	0.971828
LINC00922	TSPAN9	0.981058
LINC00922	CSMD2	0.978095
LINC00922	CECR2	0.970534
LINC00922	CLN5	0.956884
LINC00922	MMP11	0.982633
LINC00922	SPSB4	0.981423
LINC00922	SLC13A5	0.973089
LINC00922	PLAC1	0.953987
LINC00922	PADI3	0.957089
LINC00922	MYCBP2	0.966653
LINC00922	ITFG2	0.964371
LINC00922	AK5	0.958897
LINC00922	FRG2	0.972617
LINC00922	USP9Y	0.950723
LINC00922	FBXL3	0.963425
LINC00922	TDRD5	0.962226
LINC00922	PFKFB4	0.954831
LINC00922	AP000349.1	0.980153
LINC00922	FOXM1	0.952916
LINC00922	ZBED1	0.956958
LINC00922	GRM4	0.979126
LINC00922	CHGB	0.952915
LINC00922	NXPH4	0.973738
LINC00922	ST8SIA2	0.99426
LINC00922	PLXDC1	0.974055
LINC00922	PPP2R3B	0.968016
LINC00922	KDM5D	0.961806
RP11-160H22.3	ERCC1	0.970738
RP11-160H22.3	FOSB	0.970777
RP11-547C5.2	INPP4B	0.95612
RP11-547C5.2	AC174470.1	0.952705
RP11-553N19.1	ASTN1	0.965856
RP11-553N19.1	TMEM132C	0.983338
RP11-553N19.1	PDGFD	0.962771
RP11-553N19.1	NLGN1	0.951879
RP11-553N19.1	TIMP4	0.961988
RP11-553N19.1	PLCXD3	0.964932
RP11-553N19.1	PLIN1	0.955306
RP11-553N19.1	ASPA	0.956613
RP11-553N19.1	SLC1A7	0.950416
RP11-321C24.1	GPALPP1	0.993397
FAM224A	USP9Y	0.951174
RP11-218F4.1	CCDC129	0.986486
RP11-218F4.1	MUC19	0.982855
RP11-218F4.1	MUC7	0.978551
RP11-218F4.1	C4orf40	0.976028
RP11-218F4.1	MPO	0.990798
RP11-218F4.1	CSN3	0.959505
RP11-218F4.1	LPO	0.990566
RP11-218F4.1	UGT2B7	0.953094
RP11-218F4.1	SLC13A2	0.976286
RP11-218F4.1	HTN1	0.984473
RP11-218F4.1	ZG16B	0.993597
RP11-218F4.1	LACRT	0.975882
RP11-218F4.1	SCGB2A2	0.99352
RP11-218F4.1	PLEKHS1	0.972015
RP11-218F4.1	NPY1R	0.980543
RP11-218F4.1	ODAM	0.985461
RP11-218F4.1	LTF	0.990927
RP11-218F4.1	RALYL	0.974161
RP11-218F4.1	RP11-1220K2.2	0.964653
RP11-218F4.1	C6orf58	0.963083
RP11-218F4.1	PROL1	0.975046
RP11-218F4.1	PIP	0.991076
RP4-594I10.3	RCAN3	0.951391
RP5-836J3.1	TMEM74	0.952368
RP5-836J3.1	SERTAD4	0.95003
RP5-836J3.1	SLC27A6	0.952943
RP11-687M24.4	GPR50	0.956641
RP11-687M24.4	IL36B	0.971928
RP11-687M24.4	TREX2	0.972641
AC107399.2	SHC4	0.983512
AC107399.2	NTNG1	0.992158
CNTN4-AS2	CNTN4	0.972415
LINC01011	PITX2	0.971433
CTD-2139B15.2	BEST1	0.957971
CTD-2139B15.2	FTH1	0.952996
RP11-809H16.5	TMEM74	0.964634
RP11-809H16.5	SERTAD4	0.967302
RP11-809H16.5	SLC27A6	0.963687
RP11-404I7.2	PCDH10	0.97611
RP11-624D11.2	TULP3	0.962986
RP11-624D11.2	USP9Y	0.963217
AC006296.1	IGLL5	0.954225
AC006296.1	PIM2	0.958898
AC006296.1	MZB1	0.959956
AC006296.1	FAM46C	0.954695
AC006296.1	RP11-553A10.1	0.952037
AC006296.1	CH17-132F21.1	0.964557
RP11-175B12.2	DLEU1	0.968775
AC108463.1	FMNL3	0.959348
AC108463.1	CTHRC1	0.954292
AC108463.1	TSHZ3	0.955029
RP1-97G4.1	SLC4A4	0.98019
RP1-97G4.1	EPHA6	0.970199
RP1-97G4.1	LRFN2	0.96399
RP1-97G4.1	CRABP1	0.952489
RP1-97G4.1	GSTA1	0.96959
RP1-97G4.1	SGCZ	0.980904
RP1-97G4.1	TENM1	0.960801
RP1-97G4.1	SIAH3	0.973085
RP1-97G4.1	GRID2	0.958975
RP1-97G4.1	ENHO	0.977043
RP1-97G4.1	METTL24	0.97193
RP1-97G4.1	PCDHAC2	0.95611
RP1-97G4.1	COL28A1	0.957353
RP1-97G4.1	AC010368.2	0.960729
RP1-97G4.1	DLGAP1	0.965037
RP1-97G4.1	FAM71A	0.963707
RP1-97G4.1	KCNIP4	0.968077
RP1-97G4.1	CES1	0.960039
RP3-495K2.3	TTC34	0.952189
RP3-495K2.3	RPTN	0.957628
RP3-495K2.3	LCE2B	0.950023
RP3-495K2.3	FLG2	0.974499
RP3-495K2.3	LCE5A	0.959191
RP3-495K2.3	STS	0.972494
RP3-495K2.3	ARG1	0.970269
RP3-495K2.3	IL37	0.968269
RP3-495K2.3	LRRC38	0.95436
RP3-495K2.3	LCE6A	0.953366
RP3-495K2.3	SLC35F4	0.957065
AC012368.1	GJC2	0.951145
CTD-2643K12.2	MT4	0.955875
CTD-2643K12.2	MT1A	0.95281
CTD-2643K12.2	MT1M	0.956493
CTD-2643K12.2	SFTA2	0.971041
CTD-2643K12.2	AP002353.1	0.951412
CTD-2643K12.2	ABRA	0.956368
RP1-197B17.3	ENDOU	0.998785
LINC00160	MYH7	0.956233
LINC00160	MYH6	0.969782
LINC00160	DTNA	0.951893
LINC00917	LCE1E	0.95583
LINC00917	TTC34	0.951069
LINC00917	LCE2D	0.952543
LINC00917	LCE2B	0.982275
LINC00917	LCE2C	0.978469
LINC00917	IL37	0.967517
LINC00917	CHRM2	0.982627
LINC00917	LCE1A	0.960806
LINC00917	LCE1F	0.965633
LINC00917	LCE6A	0.977826
LINC00917	LCE2A	0.98813
LINC00917	LCE1D	0.985357
RP11-138I17.1	CNTN4	0.960322
RP11-338L18.1	ZNF146	0.951283
CTD-2240J17.1	KIAA0125	0.971482
CTD-2240J17.1	CD79A	0.95197
CTD-2240J17.1	SLC17A9	0.955234
CTD-2240J17.1	PIM2	0.96632
CTD-2240J17.1	IL5RA	0.984413
CTD-2240J17.1	MEI1	0.952088
CTD-2240J17.1	FAM92B	0.955201
CTD-2240J17.1	MZB1	0.970343
CTD-2240J17.1	FAM46C	0.967695
CTD-2240J17.1	TMC3	0.973169
CTD-2240J17.1	C12orf55	0.96086
CTD-2240J17.1	RP11-1070N10.3	0.960003
CTD-2240J17.1	POU2AF1	0.964804
CTD-2240J17.1	RP11-685N3.1	0.978399
CTD-2240J17.1	DCC	0.959586
CTD-2240J17.1	FCRL5	0.973639
CTD-2240J17.1	PNOC	0.960742
CTD-2240J17.1	ACOXL	0.960551
AC060834.3	LRRC3B	0.976503
AC060834.3	TMEM74	0.950974
AC060834.3	SCN1A	0.96995
AC060834.3	KRT76	0.963684
AC060834.3	AC018512.1	0.984488
AC060834.3	KRT3	0.9725
TTTY8	RTP3	0.953903
TTTY8	GP6	0.964773
TTTY8	UCHL3	0.975217
TTTY8	TSPAN9	0.982417
TTTY8	HTR2C	0.965983
TTTY8	CSMD2	0.960013
TTTY8	CECR2	0.987484
TTTY8	CLN5	0.963639
TTTY8	MMP11	0.956603
TTTY8	SPSB4	0.977585
TTTY8	SLC13A5	0.98084
TTTY8	PLAC1	0.976197
TTTY8	PADI3	0.989025
TTTY8	MYCBP2	0.986791
TTTY8	AK5	0.951251
TTTY8	FRG2	0.990613
TTTY8	USP9Y	0.960088
TTTY8	FBXL3	0.986297
TTTY8	TDRD5	0.987407
TTTY8	C3orf30	0.956524
TTTY8	TBC1D4	0.960485
TTTY8	AP000349.1	0.953894
TTTY8	GRM4	0.998193
TTTY8	NXPH4	0.987516
TTTY8	ST8SIA2	0.976733
TTTY8	PPP2R3B	0.95885
AC010084.1	HPSE2	0.958148
RP11-265N7.1	C15orf54	0.957861
AC004019.18	CECR2	0.988076
AC004019.18	MMP11	0.955009
AC004019.18	SPSB4	0.958649
AC004019.18	FRG2	0.955958
AC004019.18	TDRD5	0.958267
AC004019.18	GRM4	0.968631
AC004019.18	NXPH4	0.959227
AC004019.18	ST8SIA2	0.957276
TTTY7B	RTP3	0.953775
TTTY7B	GP6	0.964191
TTTY7B	UCHL3	0.976647
TTTY7B	TSPAN9	0.983748
TTTY7B	HTR2C	0.965977
TTTY7B	CSMD2	0.960508
TTTY7B	CECR2	0.988636
TTTY7B	CLN5	0.962968
TTTY7B	BTNL3	0.951052
TTTY7B	MMP11	0.955254
TTTY7B	SPSB4	0.97855
TTTY7B	SLC13A5	0.982262
TTTY7B	PLAC1	0.976757
TTTY7B	PADI3	0.989844
TTTY7B	MYCBP2	0.98854
TTTY7B	ITFG2	0.951792
TTTY7B	FRG2	0.991835
TTTY7B	USP9Y	0.961614
TTTY7B	FBXL3	0.987725
TTTY7B	TDRD5	0.986718
TTTY7B	C3orf30	0.953712
TTTY7B	TBC1D4	0.961735
TTTY7B	AP000349.1	0.951636
TTTY7B	GRM4	0.998415
TTTY7B	NXPH4	0.987456
TTTY7B	ST8SIA2	0.975862
TTTY7B	PPP2R3B	0.960247
TTTY7B	KDM5D	0.950602
RP11-498P14.4	TTC34	0.95836
RP11-498P14.4	SLC22A25	0.953125
RP11-498P14.4	KRT33B	0.960836
RP11-498P14.4	LCE5A	0.964831
RP11-498P14.4	SLC22A10	0.955885
RP11-498P14.4	IL37	0.955931
RP11-498P14.4	LRRC38	0.974495
RP11-138J23.1	RTP3	0.951149
RP11-138J23.1	GP6	0.966659
RP11-138J23.1	UCHL3	0.967923
RP11-138J23.1	TSPAN9	0.981136
RP11-138J23.1	HTR2C	0.956325
RP11-138J23.1	CSMD2	0.964481
RP11-138J23.1	CECR2	0.981256
RP11-138J23.1	CLN5	0.971504
RP11-138J23.1	MMP11	0.970011
RP11-138J23.1	SPSB4	0.975359
RP11-138J23.1	SLC13A5	0.974345
RP11-138J23.1	PLAC1	0.973633
RP11-138J23.1	PADI3	0.978676
RP11-138J23.1	MYCBP2	0.977779
RP11-138J23.1	AK5	0.960094
RP11-138J23.1	FRG2	0.982801
RP11-138J23.1	USP9Y	0.952956
RP11-138J23.1	FBXL3	0.980685
RP11-138J23.1	TDRD5	0.984002
RP11-138J23.1	C3orf30	0.952889
RP11-138J23.1	TBC1D4	0.950724
RP11-138J23.1	AP000349.1	0.970848
RP11-138J23.1	GRM4	0.991389
RP11-138J23.1	NXPH4	0.983977
RP11-138J23.1	ST8SIA2	0.983837
RP11-138J23.1	PPP2R3B	0.951993
RP11-276H19.1	EYA1	0.961387
RP11-276H19.1	MYLIP	0.951527
RP11-276H19.1	ZNF429	0.964176
RP11-276H19.1	SLC27A6	0.961783
RP11-88H10.3	TF	0.970723
RP11-88H10.3	NXPE2	0.972779
RP11-88H10.3	PABPC1L2B	0.988222
RP11-88H10.3	VSIG2	0.989061
RP11-88H10.3	GOLM1	0.97293
RP11-88H10.3	DNAJC22	0.961318
RP11-88H10.3	GALNT4	0.967888
RP11-88H10.3	C1QTNF8	0.990005
RP11-88H10.3	B3GALT5	0.980621
RP11-88H10.3	WIF1	0.969265
RP11-88H10.3	CDR1	0.982336
RP11-88H10.3	ITLN1	0.984593
RP11-88H10.3	LRRC31	0.987828
RP11-88H10.3	PRH2	0.964681
RP11-88H10.3	PBOV1	0.960404
RP11-88H10.3	PTF1A	0.991888
RP11-88H10.3	GAL3ST2	0.962226
RP11-88H10.3	ALDH1A1	0.97872
RP11-88H10.3	CREB3L4	0.976133
RP11-88H10.3	MDGA2	0.987903
RP11-88H10.3	POC1B-GALNT4	0.967888
RP11-88H10.3	SCGB2A1	0.991689
RP11-88H10.3	CLDN10	0.989067
RP11-88H10.3	NKX3-1	0.98954
RP11-88H10.3	SLC26A2	0.951401
RP11-88H10.3	B3GNT6	0.992437
RP11-88H10.3	LDLRAD1	0.990434
RP11-88H10.3	UGT2B28	0.984005
RP11-88H10.3	BPIFA2	0.969112
RP11-88H10.3	PRR15L	0.982627
RP11-88H10.3	TFF3	0.990442
RP11-88H10.3	PAX1	0.986093
RP11-88H10.3	GP2	0.971934
RP11-88H10.3	TMEM178A	0.988263
RP11-88H10.3	ETV1	0.987943
RP11-88H10.3	AGR3	0.984017
RP11-88H10.3	CAPN9	0.968761
RP11-88H10.3	MS4A8	0.98842
RP11-88H10.3	NXPE4	0.971063
RP11-88H10.3	BCAS1	0.950241
RP11-88H10.3	HEPACAM2	0.990838
RP11-88H10.3	RNF183	0.990349
RP11-88H10.3	BPIFB1	0.981969
RP11-88H10.3	AC138517.1	0.978074
RP11-88H10.3	AGR2	0.979106
RP11-88H10.3	REG4	0.989483
RP11-88H10.3	CA10	0.979689
RP11-88H10.3	CGREF1	0.974632
RP11-88H10.3	GABRB1	0.969624
RP11-88H10.3	MFSD6L	0.968757
RP11-88H10.3	SPDEF	0.984208
RP11-88H10.3	MFSD4	0.965895
RP11-88H10.3	C9orf152	0.953822
RP11-88H10.3	SYTL5	0.964666
RP11-88H10.3	SLC44A4	0.972589
RP11-88H10.3	C21orf88	0.975596
RP11-88H10.3	PRH1	0.980389
RP11-88H10.3	SCGB3A1	0.962833
RP11-88H10.3	ARMC3	0.986096
RP11-88H10.3	CDH12	0.97739
RP11-88H10.3	LCN1	0.972332
RP11-88H10.3	TFF1	0.990386
RP11-88H10.3	PRB3	0.951699
RP11-88H10.3	GRIA2	0.963192
RP11-88H10.3	SCGB1D2	0.96666
RP11-88H10.3	MUC16	0.971539
RP11-88H10.3	TFF2	0.991259
RP11-88H10.3	FOXA3	0.988914
RP11-88H10.3	TTC6	0.956581
RP11-88H10.3	MUC5B	0.986216
RP11-88H10.3	GNMT	0.967117
RP11-88H10.3	PDE8B	0.96732
RP11-88H10.3	BPIFB2	0.988786
RP11-88H10.3	VIP	0.958537
RP11-88H10.3	SIM2	0.984298
RP11-88H10.3	TAAR1	0.991888
RP11-88H10.3	ST6GALNAC1	0.99194
RP11-88H10.3	FAM177B	0.96968
RP11-88H10.3	LRRIQ4	0.978736
RP11-88H10.3	SSTR5	0.991379
RP11-88H10.3	NWD1	0.972792
RP11-88H10.3	GJB1	0.973475
RP11-88H10.3	STAC2	0.969654
RP11-88H10.3	KIAA1147	0.953923
RP11-88H10.3	PANX3	0.991206
RP11-88H10.3	ENTPD8	0.978204
RP11-88H10.3	KIAA1244	0.968787
RP11-88H10.3	PABPC1L2A	0.989626
RP11-88H10.3	HMGCS2	0.986683
RP11-88H10.3	TSPAN12	0.974854
RP11-88H10.3	KRT7	0.956626
RP11-88H10.3	ADAL	0.979465
RP11-88H10.3	DACH2	0.990748
RP11-88H10.3	PRR15	0.962004
RP11-88H10.3	TSPAN1	0.972708
RP11-88H10.3	CXXC4	0.967448
TSIX	HOGA1	0.954169
TSIX	LMOD2	0.955276
TSIX	MT1A	0.986487
TSIX	MTRNR2L1	0.993162
TSIX	TRIM63	0.963762
TSIX	SH3BGR	0.961717
TSIX	LAMA2	0.950951
TSIX	FKBP5	0.955885
TSIX	MT1M	0.991729
TSIX	HBB	0.964298
TSIX	AP002353.1	0.967807
TSIX	KRTAP3-2	0.952345
TSIX	BPIFA1	0.96339
TSIX	ABRA	0.969339
TSIX	TECRL	0.957885
TSIX	AC026461.1	0.951283
TSIX	MYOZ2	0.976976
RP4-765H13.1	ALDH1L1	0.970389
RP4-765H13.1	CHRM3	0.984855
RP4-765H13.1	ERBB4	0.963182
RP4-765H13.1	FOXA1	0.968392
RP4-765H13.1	SLC34A2	0.964975
RP4-765H13.1	PSG3	0.974193
RP4-765H13.1	CHDH	0.963581
RP4-765H13.1	PODXL2	0.958011
RP4-765H13.1	NOL4	0.952734
RP4-765H13.1	NKX2-6	0.95952
RP4-765H13.1	CHST9	0.972275
RP4-765H13.1	PCP4	0.970687
RP4-765H13.1	ICA1	0.954806
RP4-765H13.1	C9orf152	0.962547
RP4-765H13.1	EFCAB4A	0.961253
RP4-765H13.1	LRRC26	0.958555
RP4-765H13.1	FAM3D	0.961014
RP4-765H13.1	PLEKHB1	0.978058
RP4-765H13.1	SCGB3A1	0.953327
RP4-765H13.1	CHAD	0.97299
RP4-765H13.1	M1AP	0.968842
RP4-765H13.1	ACTG2	0.958561
RP4-765H13.1	MLPH	0.97715
RP4-765H13.1	GRIA2	0.952034
RP4-765H13.1	KIAA1324	0.965215
RP4-765H13.1	ERN2	0.97031
RP4-765H13.1	TTC6	0.962793
RP4-765H13.1	ARHGEF38	0.96338
RP4-765H13.1	PPP1R1B	0.986133
RP4-765H13.1	NUPR1L	0.959688
RP4-765H13.1	CHRM1	0.969919
RP4-765H13.1	WNK2	0.970027
RP4-765H13.1	ESRRG	0.96002
RP4-765H13.1	ANG	0.953884
RP4-765H13.1	PPP1R9A	0.962513
RP4-765H13.1	PIGR	0.953207
RP4-765H13.1	CHST4	0.967029
RP4-765H13.1	AQP5	0.954084
RP4-765H13.1	TOX3	0.982335
RP4-765H13.1	EPHA5	0.966095
RP4-765H13.1	IGSF5	0.95506
RP4-765H13.1	CRISP3	0.97758
RP4-765H13.1	CGNL1	0.969026
RP4-765H13.1	PLCB4	0.970464
RP4-765H13.1	CTNND2	0.979066
RP4-765H13.1	BEND7	0.976454
RP4-765H13.1	CRISP2	0.96043
RP4-765H13.1	DMBT1	0.958983
RP11-316P17.2	NUP107	0.96662
RP11-702B10.1	MRGPRX3	0.975439
CTD-2196E14.9	GLYR1	0.956949
RP11-324L3.1	ZP4	0.953234
RP11-324L3.1	PSORS1C2	0.953326
CTC-756D1.2	PNOC	0.955237
AC008592.8	TTC34	0.959933
AC008592.8	LCE2B	0.954086
AC008592.8	LCE5A	0.965799
AC008592.8	ARG1	0.951222
AC008592.8	PNMAL1	0.964568
AC008592.8	KRT34	0.952216
AC008592.8	IL37	0.961934
AC008592.8	LCE1A	0.964341
AC008592.8	LRRC38	0.954215
AC008592.8	LCE1B	0.952378
AC008592.8	SLC35F4	0.95977
RP11-252C15.1	SLC4A4	0.98296
RP11-252C15.1	EPHA6	0.976989
RP11-252C15.1	LRFN2	0.962751
RP11-252C15.1	ASTN1	0.957536
RP11-252C15.1	PPAP2B	0.966385
RP11-252C15.1	TMEM132C	0.95578
RP11-252C15.1	CDH10	0.963999
RP11-252C15.1	C6orf99	0.950498
RP11-252C15.1	NLGN1	0.964083
RP11-252C15.1	SGCZ	0.980565
RP11-252C15.1	TENM1	0.953783
RP11-252C15.1	SIAH3	0.979321
RP11-252C15.1	NCAM2	0.972076
RP11-252C15.1	GRID2	0.990283
RP11-252C15.1	ENHO	0.952135
RP11-252C15.1	AR	0.95168
RP11-252C15.1	ZNF804B	0.953819
RP11-252C15.1	AC010368.2	0.972026
RP11-252C15.1	ASPA	0.970912
RP11-252C15.1	DLGAP1	0.95407
RP11-252C15.1	FAM71A	0.97996
RP11-252C15.1	KCNIP4	0.971361
RP11-252C15.1	CES1	0.957478
CTD-2215E18.3	HES2	0.956432
RP11-388K12.1	SLC4A4	0.983266
RP11-388K12.1	EPHA6	0.984519
RP11-388K12.1	LRFN2	0.972743
RP11-388K12.1	GSTA1	0.954445
RP11-388K12.1	CDH10	0.966022
RP11-388K12.1	SGCZ	0.985112
RP11-388K12.1	TENM1	0.950883
RP11-388K12.1	SIAH3	0.985239
RP11-388K12.1	GRID2	0.981784
RP11-388K12.1	ENHO	0.977334
RP11-388K12.1	COL28A1	0.958018
RP11-388K12.1	AC010368.2	0.981845
RP11-388K12.1	ASPA	0.962702
RP11-388K12.1	FAM71A	0.975051
RP11-388K12.1	KCNIP4	0.98001
RP11-388K12.1	WNK4	0.953961
RP11-701P16.5	KIAA0125	0.957592
RP11-701P16.5	MIXL1	0.959203
RP11-701P16.5	ZBP1	0.951949
RP11-701P16.5	FAM92B	0.952962
RP11-701P16.5	MMP8	0.953235
RP11-701P16.5	FCRLB	0.95299
RP11-701P16.5	CD38	0.95792
RP11-701P16.5	AF165138.7	0.971724
RP11-701P16.5	DNAJB9	0.950248
RP11-701P16.5	TPTE2	0.952623
RP11-701P16.5	ACOXL	0.957325
RP5-968D22.3	RTP3	0.95851
RP5-968D22.3	HTR2C	0.952052
RP11-80K6.2	CCDC129	0.97722
RP11-80K6.2	MUC19	0.991477
RP11-80K6.2	MUC7	0.988604
RP11-80K6.2	C4orf40	0.98673
RP11-80K6.2	MPO	0.982971
RP11-80K6.2	CSN3	0.963101
RP11-80K6.2	LPO	0.996554
RP11-80K6.2	UGT2B7	0.958349
RP11-80K6.2	SLC13A2	0.981609
RP11-80K6.2	HTN1	0.992311
RP11-80K6.2	ZG16B	0.996822
RP11-80K6.2	LACRT	0.98673
RP11-80K6.2	SCGB2A2	0.997014
RP11-80K6.2	PLEKHS1	0.968418
RP11-80K6.2	NPY1R	0.956428
RP11-80K6.2	ODAM	0.993449
RP11-80K6.2	LTF	0.99502
RP11-80K6.2	RALYL	0.95984
RP11-80K6.2	RP11-1220K2.2	0.950009
RP11-80K6.2	C6orf58	0.972443
RP11-80K6.2	PROL1	0.986185
RP11-80K6.2	PIP	0.995757
CTA-392E5.1	PSKH2	0.955554
CTA-392E5.1	IFNL1	0.960832
CTA-392E5.1	CT62	0.952214
CTA-392E5.1	DKK1	0.955161
RP11-91G21.1	PADI3	0.950198
RP11-91G21.1	GRM4	0.952621
RP11-91G21.1	NXPH4	0.96126
RP11-734I18.1	CD5L	0.952007
RP11-191N8.2	ADAMTS12	0.955232
RP11-191N8.2	KCND2	0.956231
TTTY8B	RTP3	0.952272
TTTY8B	GP6	0.962713
TTTY8B	UCHL3	0.974048
TTTY8B	TSPAN9	0.981481
TTTY8B	HTR2C	0.965592
TTTY8B	CSMD2	0.958471
TTTY8B	CECR2	0.987477
TTTY8B	CLN5	0.961857
TTTY8B	MMP11	0.954913
TTTY8B	SPSB4	0.976863
TTTY8B	SLC13A5	0.979959
TTTY8B	PLAC1	0.974906
TTTY8B	PADI3	0.988253
TTTY8B	MYCBP2	0.986785
TTTY8B	AK5	0.951579
TTTY8B	FRG2	0.990122
TTTY8B	USP9Y	0.960384
TTTY8B	FBXL3	0.985546
TTTY8B	TDRD5	0.987858
TTTY8B	C3orf30	0.957502
TTTY8B	TBC1D4	0.962037
TTTY8B	AP000349.1	0.952067
TTTY8B	GRM4	0.998505
TTTY8B	NXPH4	0.986703
TTTY8B	ST8SIA2	0.975604
TTTY8B	PPP2R3B	0.957643
RP11-108K3.2	BOLL	0.964638
RP11-108K3.2	CYP19A1	0.972535
RP11-108K3.2	PDPN	0.957888
RP11-108K3.2	TNFAIP8L3	0.950906
RP11-6C14.1	KIAA1045	0.985268
RP11-6C14.1	CDH4	0.982477
RP11-6C14.1	GPR50	0.988333
RP11-6C14.1	MYT1	0.957757
RP11-6C14.1	TREX2	0.951198
RP11-388M20.9	CACNA1S	0.953688
RP11-388M20.9	RYR1	0.961272
RP11-388M20.9	STAC3	0.952298
RP11-388M20.9	EEF1A2	0.96937
RP11-388M20.9	BEST3	0.953714
RP11-388M20.9	HSPB7	0.950025
RP11-733O18.1	NUAK1	0.965137
RP11-733O18.1	AMIGO2	0.955909
RP11-733O18.1	ZNF532	0.964891
RP11-733O18.1	ACVR1C	0.960601
MIR155HG	LPXN	0.953654
CTD-2532K18.1	THEG	0.962034
CTD-2532K18.1	ADAMTS20	0.964935
CTD-2532K18.1	GLRA2	0.963001
CTD-2532K18.1	PPEF1	0.964519
CTD-2532K18.1	MYF5	0.960756
RP11-172E10.1	PAG1	0.952933
RP11-100L22.1	HOGA1	0.956619
RP11-100L22.1	SFTA2	0.970327
RP11-100L22.1	RCAN2	0.956721
RP11-100L22.1	MYLK4	0.970556
RP11-100L22.1	HBA2	0.958452
RP11-100L22.1	HBA1	0.960679
RP11-122C21.1	CDH4	0.959297
RP11-122C21.1	NPTX1	0.992791
RP11-122C21.1	MYT1	0.971098
RP11-122C21.1	CELSR3	0.951857
RP11-122C21.1	SUN3	0.958659
RP11-122C21.1	IL17F	0.967712
RP11-669M16.1	KLRF2	0.963454
RP11-669M16.1	BLOC1S5-TXNDC5	0.975786
RP11-669M16.1	IGLL5	0.984107
RP11-669M16.1	KIAA0125	0.990502
RP11-669M16.1	GLCCI1	0.958285
RP11-669M16.1	PIM2	0.990267
RP11-669M16.1	TXNDC11	0.967876
RP11-669M16.1	MIXL1	0.983272
RP11-669M16.1	ANKRD45	0.97571
RP11-669M16.1	IL5RA	0.971864
RP11-669M16.1	SEL1L	0.958418
RP11-669M16.1	FAM92B	0.984449
RP11-669M16.1	MZB1	0.987405
RP11-669M16.1	TNFRSF17	0.979747
RP11-669M16.1	FAM46C	0.973065
RP11-669M16.1	TMC3	0.969718
RP11-669M16.1	C12orf55	0.980895
RP11-669M16.1	KCNA3	0.952325
RP11-669M16.1	POU2AF1	0.952775
RP11-669M16.1	IGLL1	0.980611
RP11-669M16.1	NLRP14	0.965193
RP11-669M16.1	AF165138.7	0.95966
RP11-669M16.1	RP11-685N3.1	0.986938
RP11-669M16.1	TXNDC5	0.974989
RP11-669M16.1	CLEC2A	0.973273
RP11-669M16.1	TPTE2	0.973708
RP11-669M16.1	FCRL5	0.992298
RP11-669M16.1	SPAG4	0.979493
RP11-669M16.1	IRF4	0.951067
RP11-669M16.1	TP53INP1	0.965233
RP11-669M16.1	PNOC	0.965031
RP11-669M16.1	RARRES2	0.960113
RP11-669M16.1	RP11-553A10.1	0.970821
RP11-669M16.1	ACOXL	0.99197
RP11-669M16.1	LAX1	0.97947
RP11-669M16.1	DERL3	0.983872
RP11-669M16.1	CH17-132F21.1	0.963202
RP11-309I15.1	LEPRE1	0.971482
RP11-309I15.1	ADAMTS12	0.970201
RP11-309I15.1	IKBIP	0.962779
RP11-309I15.1	COL3A1	0.95498
RP11-309I15.1	COL5A2	0.968661
RP11-309I15.1	SERPINH1	0.955907
RP11-309I15.1	PPAPDC1A	0.952542
RP11-309I15.1	MMP14	0.96662
RP11-309I15.1	POSTN	0.951239
RP11-309I15.1	RFX8	0.952666
RP11-309I15.1	ZNF469	0.95043
AC104777.2	C2orf66	0.962985
AC000124.1	CCDC110	0.951456
AC000124.1	C9orf152	0.950678
AC000124.1	EPHA5	0.958351
RP6-114E22.1	WDR66	0.956368
RP6-114E22.1	OCIAD2	0.972771
CASC9	XKR9	0.973174
RP11-676F20.1	NLRP10	0.967398
RP13-379O24.2	LRRTM3	0.95092
RP13-379O24.2	SH3BGR	0.95615
RP13-379O24.2	C20orf166	0.966683
RP13-379O24.2	ACTN2	0.959248
RP13-379O24.2	VGLL2	0.963745
RP13-379O24.2	CACNG1	0.982818
RP11-449D8.5	NXPH1	0.977932
RP11-449D8.5	PSKH2	0.953294
RP11-449D8.5	MTNR1A	0.977872
RP11-449D8.5	RBBP8	0.971741
RP11-449D8.5	AC008372.1	0.991277
RP11-449D8.5	CT62	0.989806
RP11-449D8.5	PSG4	0.963365
RP11-449D8.5	UCHL1	0.959353
RP11-162G9.1	RP11-389E17.1	0.987073
CTD-3179P9.1	ABCA8	0.955209
RP11-90C4.1	SLC4A4	0.991476
RP11-90C4.1	EPHA6	0.991475
RP11-90C4.1	LRFN2	0.979982
RP11-90C4.1	GSTA1	0.961552
RP11-90C4.1	CDH10	0.963228
RP11-90C4.1	SGCZ	0.997425
RP11-90C4.1	SIAH3	0.99675
RP11-90C4.1	NCAM2	0.957663
RP11-90C4.1	GRID2	0.99087
RP11-90C4.1	ENHO	0.983216
RP11-90C4.1	AC010368.2	0.995082
RP11-90C4.1	ASPA	0.95402
RP11-90C4.1	DLGAP1	0.960398
RP11-90C4.1	FAM71A	0.980921
RP11-90C4.1	KCNIP4	0.991216
RP11-90C4.1	CES1	0.959427
RP11-90C4.1	WNK4	0.964961
RP11-214N1.1	KLRF2	0.972566
RP11-214N1.1	IGLL5	0.956697
RP11-214N1.1	ANKRD45	0.954791
RP11-214N1.1	CLEC2A	0.953878
RP11-214N1.1	RP11-553A10.1	0.958143
RP11-485M7.3	LCE1C	0.965596
RP11-485M7.3	RPTN	0.981448
RP11-485M7.3	LCE2B	0.950531
RP11-485M7.3	SMPD3	0.972897
RP11-485M7.3	LIPM	0.956656
RP11-485M7.3	FLG2	0.999229
RP11-485M7.3	HAL	0.987691
RP11-485M7.3	LCE5A	0.968994
RP11-485M7.3	STS	0.963472
RP11-485M7.3	ARG1	0.987139
RP11-485M7.3	IL37	0.963115
RP11-485M7.3	LCE6A	0.959943
RP11-485M7.3	CASP14	0.958332
RP11-485M7.3	SLC35F4	0.958028
RP11-81H14.2	GLCCI1	0.966986
RP11-81H14.2	PIM2	0.973659
RP11-81H14.2	TXNDC11	0.955934
RP11-81H14.2	MZB1	0.95974
RP11-81H14.2	TMEM156	0.976597
RP11-81H14.2	FAM46C	0.960572
RP11-81H14.2	STAP1	0.961383
RP11-81H14.2	C12orf55	0.956101
RP11-81H14.2	KCNA3	0.974743
RP11-81H14.2	RP11-685N3.1	0.957478
RP11-81H14.2	P2RY8	0.975892
RP11-81H14.2	LAX1	0.965184
RP5-1065P14.2	MUC19	0.967987
RP5-1065P14.2	MUC7	0.967856
RP5-1065P14.2	C4orf40	0.967405
RP5-1065P14.2	LPO	0.967954
RP5-1065P14.2	HTN1	0.967222
RP5-1065P14.2	ZG16B	0.962139
RP5-1065P14.2	LACRT	0.967504
RP5-1065P14.2	SCGB2A2	0.962428
RP5-1065P14.2	ODAM	0.969866
RP5-1065P14.2	LTF	0.965841
RP5-1065P14.2	C6orf58	0.951654
RP5-1065P14.2	PROL1	0.966854
RP5-1065P14.2	PIP	0.965553
RP11-768G7.2	SLC4A4	0.9584
RP11-768G7.2	TMEM132C	0.973477
RP11-768G7.2	PRSS46	0.959551
RP11-768G7.2	PDGFD	0.952871
RP11-768G7.2	NLGN1	0.956818
RP11-768G7.2	LAMB4	0.974217
RP11-768G7.2	FGF14	0.953888
RP11-768G7.2	PLCXD3	0.965505
RP11-768G7.2	GRID2	0.952885
RP11-768G7.2	COL28A1	0.952313
RP11-768G7.2	AR	0.96619
RP11-768G7.2	ARHGAP6	0.967278
RP11-768G7.2	ASPA	0.955294
CTA-363E6.2	TMEM211	0.953186
CTA-363E6.2	VAT1L	0.950991
RP11-141E13.1	SLC4A4	0.955572
RP11-141E13.1	LRFN2	0.954518
RP11-141E13.1	SGCZ	0.958158
RP11-141E13.1	SIAH3	0.961487
RP11-141E13.1	POLG2	0.952783
RP11-141E13.1	KCNIP4	0.952885
LINC00583	PDGFD	0.956302
LINC00583	HMGCLL1	0.950146
RP11-646E18.2	NXPE2	0.977297
RP11-646E18.2	PABPC1L2B	0.992228
RP11-646E18.2	PDE4D	0.953278
RP11-646E18.2	LPPR1	0.961691
RP11-646E18.2	VSIG2	0.989706
RP11-646E18.2	GOLM1	0.98357
RP11-646E18.2	DNAJC22	0.967471
RP11-646E18.2	SEMA3E	0.954822
RP11-646E18.2	GALNT4	0.975435
RP11-646E18.2	C1QTNF8	0.990882
RP11-646E18.2	B3GALT5	0.988154
RP11-646E18.2	WIF1	0.969499
RP11-646E18.2	SMIM1	0.964907
RP11-646E18.2	CDR1	0.984834
RP11-646E18.2	ITLN1	0.990988
RP11-646E18.2	LRRC31	0.99211
RP11-646E18.2	PRH2	0.958904
RP11-646E18.2	PBOV1	0.960421
RP11-646E18.2	PTF1A	0.99489
RP11-646E18.2	GAL3ST2	0.960896
RP11-646E18.2	ALDH1A1	0.96638
RP11-646E18.2	CREB3L4	0.979553
RP11-646E18.2	MDGA2	0.992863
RP11-646E18.2	SMIM22	0.961283
RP11-646E18.2	POC1B-GALNT4	0.975436
RP11-646E18.2	SCGB2A1	0.995111
RP11-646E18.2	CLDN10	0.993388
RP11-646E18.2	NKX3-1	0.993694
RP11-646E18.2	B3GNT6	0.993364
RP11-646E18.2	LDLRAD1	0.995255
RP11-646E18.2	UGT2B28	0.980836
RP11-646E18.2	CCDC110	0.955622
RP11-646E18.2	BPIFA2	0.964022
RP11-646E18.2	PRR15L	0.990622
RP11-646E18.2	TFF3	0.993888
RP11-646E18.2	PAX1	0.975048
RP11-646E18.2	GP2	0.977434
RP11-646E18.2	TMEM178A	0.992856
RP11-646E18.2	NKX2-6	0.95593
RP11-646E18.2	ETV1	0.991089
RP11-646E18.2	AGR3	0.953726
RP11-646E18.2	CAPN9	0.972642
RP11-646E18.2	MS4A8	0.989581
RP11-646E18.2	NXPE4	0.980338
RP11-646E18.2	BCAS1	0.965409
RP11-646E18.2	PCP4	0.951198
RP11-646E18.2	HEPACAM2	0.98955
RP11-646E18.2	RNF183	0.9959
RP11-646E18.2	BPIFB1	0.97957
RP11-646E18.2	AC138517.1	0.982678
RP11-646E18.2	AGR2	0.984039
RP11-646E18.2	REG4	0.995089
RP11-646E18.2	CA10	0.973287
RP11-646E18.2	CGREF1	0.974467
RP11-646E18.2	GABRB1	0.984733
RP11-646E18.2	MFSD6L	0.975796
RP11-646E18.2	SPDEF	0.988662
RP11-646E18.2	MFSD4	0.958579
RP11-646E18.2	C9orf152	0.96369
RP11-646E18.2	SYTL5	0.981128
RP11-646E18.2	SLC44A4	0.97728
RP11-646E18.2	C21orf88	0.983688
RP11-646E18.2	SLC12A2	0.960489
RP11-646E18.2	PRH1	0.977386
RP11-646E18.2	SCGB3A1	0.959908
RP11-646E18.2	ARMC3	0.991573
RP11-646E18.2	CDH12	0.986516
RP11-646E18.2	LCN1	0.967591
RP11-646E18.2	DPY19L3	0.96154
RP11-646E18.2	TFF1	0.99378
RP11-646E18.2	PRB3	0.964725
RP11-646E18.2	GRIA2	0.965784
RP11-646E18.2	SCGB1D2	0.963885
RP11-646E18.2	MUC16	0.974947
RP11-646E18.2	TFF2	0.994504
RP11-646E18.2	FOXA3	0.994716
RP11-646E18.2	TTC6	0.960176
RP11-646E18.2	MUC5B	0.990382
RP11-646E18.2	NUPR1L	0.95157
RP11-646E18.2	GNMT	0.97786
RP11-646E18.2	PDE8B	0.968828
RP11-646E18.2	BPIFB2	0.992647
RP11-646E18.2	VIP	0.961973
RP11-646E18.2	SIM2	0.973808
RP11-646E18.2	TAAR1	0.99489
RP11-646E18.2	ST6GALNAC1	0.99294
RP11-646E18.2	FAM177B	0.973733
RP11-646E18.2	LRRIQ4	0.976233
RP11-646E18.2	SSTR5	0.993657
RP11-646E18.2	NWD1	0.976851
RP11-646E18.2	GJB1	0.980355
RP11-646E18.2	STAC2	0.970257
RP11-646E18.2	KIAA1147	0.961855
RP11-646E18.2	PANX3	0.995245
RP11-646E18.2	ENTPD8	0.989293
RP11-646E18.2	EPHA5	0.952734
RP11-646E18.2	KIAA1244	0.971935
RP11-646E18.2	PABPC1L2A	0.993444
RP11-646E18.2	IGSF5	0.956935
RP11-646E18.2	HMGCS2	0.992048
RP11-646E18.2	TSPAN12	0.977166
RP11-646E18.2	KRT7	0.956224
RP11-646E18.2	ADAL	0.990429
RP11-646E18.2	DACH2	0.995866
RP11-646E18.2	PRR15	0.952357
RP11-646E18.2	TSPAN1	0.974528
RP11-646E18.2	CXXC4	0.97197
LINC00158	LANCL2	0.951295
LINC00158	ARL14	0.95521
LINC00158	SPATS2L	0.953337
LINC00158	FIGNL1	0.952939
LINC00158	IGFL3	0.958103
RP11-348J24.2	LRP1B	0.971498
RP11-348J24.2	SLC4A4	0.986893
RP11-348J24.2	EPHA6	0.979297
RP11-348J24.2	RP11-1102P16.1	0.953551
RP11-348J24.2	LRFN2	0.973312
RP11-348J24.2	VWC2	0.969202
RP11-348J24.2	GSTA1	0.992558
RP11-348J24.2	MAOB	0.951635
RP11-348J24.2	SGCZ	0.979209
RP11-348J24.2	SIAH3	0.975325
RP11-348J24.2	GRID2	0.972352
RP11-348J24.2	ENHO	0.982385
RP11-348J24.2	COL28A1	0.962996
RP11-348J24.2	AR	0.951087
RP11-348J24.2	AC010368.2	0.968743
RP11-348J24.2	KCNIP4	0.9709
RP11-348J24.2	WNK4	0.979124
RP11-733C7.1	SLC4A4	0.965804
RP11-733C7.1	EPHA6	0.970412
RP11-733C7.1	LRFN2	0.957949
RP11-733C7.1	SGCZ	0.977386
RP11-733C7.1	SIAH3	0.980528
RP11-733C7.1	NCAM2	0.962341
RP11-733C7.1	GRID2	0.965936
RP11-733C7.1	ENHO	0.960185
RP11-733C7.1	AC010368.2	0.986039
RP11-733C7.1	DLGAP1	0.951005
RP11-733C7.1	FAM71A	0.97327
RP11-733C7.1	KCNIP4	0.97382
[truncated: 7,958 more rows]

## Sheet: Table S7
Gene Name	Forward primer	Reverse primer	Product Size (bp)	TM（℃）
RP11-172F10.1	CGGAAAAGCGCAGTATTCGG	GTTGATGGCGATGTCAAAGA	144	58
RP1-34H18.1	GCTCTCAGCGGCCCAAGCAG	GGAAATCCTCAGGTTTGCGA	140	58
RP11-276H19.1	TCTTCCTGTACCTGCTGAAG	TCACCACGTAAGACATCTGG	142	58
RP11-466L17.1	CACTGGCTCATCCAGTTAAG	GCTGAGGCAGAAGCAGATTT	149	58
RP11-707A18.1	AGTCATTATCACCACATCCC	CTCAATATCTGCTGCAGAGC	162	58
RP11-367F23.2	AACCCTGAACTGGAATAAGC	GATATCCACAAGAGTTAAGT	213	58
HCG22	TGTCTCCCTCCGTGATTCTG	GCACATATAAACCCACAGCC	169	58
RP11-397A16.1	TCTCCAGCCATGTGAAACTG	GAATAGGACACACTCCCATC	168	58
LINC00271	GCGAGCTTCAGGGAACTTAG	GTGGCTGTAGGTACAGGAAA	184	58
CTD-3179P9.1	CGTGGCCTCTTTGTGTGAAG	CCCCTGAATGTCTTTGCAGT	138	58
ZNF667-AS1	GGGAGTGTCCGCCATAAAGT	CAACGAGCTTATAAGGAAGG	133	58
GAPDH	AGGTGAAGGTCGGAGTCAACG	AGGGGTCATTGATGGCAACA	102	58
